# Supplementary material for: During hormone depletion or tamoxifen treatment of breast cancer cells the estrogen receptor apoprotein supports cell cycling through the retinoic acid receptor α1 apoprotein
Source: Breast Cancer Res. 2011 Feb 7;13(1):R18. doi: 10.1186/bcr2827 (PMC3109587; doi:10.1186/bcr2827)
Supplement: Additional file 1 — Microarray - Control sample. Affymetrix DNA microarray analysis of MCF-7 cells transfected with non-targeting siRNA control and treated with vehicle. [file bcr2827-S1.XLS]

	MD31_Signal	MD31_Detection	MD31_Detection p-value	Descriptions
AFFX-BioB-5_at	332.3	P	0.000110	E. coli GEN=bioB DB_XREF=gb:J04423.1 NOTE=SIF corresponding to nucleotides 2032-2305 of gb:J04423.1 DEF=E.coli 7,8-diamino-pelargonic acid (bioA), biotin synthetase (bioB), 7-keto-8-amino-pelargonic acid synthetase (bioF), bioC protein, and dethiobiotin synthetase (bioD), complete cds.
AFFX-BioB-M_at	515.5	P	0.000044	E. coli GEN=bioB DB_XREF=gb:J04423.1 NOTE=SIF corresponding to nucleotides 2482-2739 of gb:J04423.1 DEF=E.coli 7,8-diamino-pelargonic acid (bioA), biotin synthetase (bioB), 7-keto-8-amino-pelargonic acid synthetase (bioF), bioC protein, and dethiobiotin synthetase (bioD), complete cds.
AFFX-BioB-3_at	347.3	P	0.000044	E. coli GEN=bioB DB_XREF=gb:J04423.1 NOTE=SIF corresponding to nucleotides 2755-3052 of gb:J04423.1 DEF=E.coli 7,8-diamino-pelargonic acid (bioA), biotin synthetase (bioB), 7-keto-8-amino-pelargonic acid synthetase (bioF), bioC protein, and dethiobiotin synthetase (bioD), complete cds.
AFFX-BioC-5_at	928.9	P	0.000044	E. coli GEN=bioC DB_XREF=gb:J04423.1 NOTE=SIF corresponding to nucleotides 4218-4566 of gb:J04423.1 DEF=E.coli 7,8-diamino-pelargonic acid (bioA), biotin synthetase (bioB), 7-keto-8-amino-pelargonic acid synthetase (bioF), bioC protein, and dethiobiotin synthetase (bioD), complete cds.
AFFX-BioC-3_at	1225.5	P	0.000044	E. coli GEN=bioC DB_XREF=gb:J04423.1 NOTE=SIF corresponding to nucleotides 4626-4878 of gb:J04423.1 DEF=E.coli 7,8-diamino-pelargonic acid (bioA), biotin synthetase (bioB), 7-keto-8-amino-pelargonic acid synthetase (bioF), bioC protein, and dethiobiotin synthetase (bioD), complete cds.
AFFX-BioDn-5_at	2073.0	P	0.000044	E. coli GEN=bioD DB_XREF=gb:J04423.1 NOTE=SIF corresponding to nucleotides 4980-5256 of gb:J04423.1, not 100% identical DEF=E.coli 7,8-diamino-pelargonic acid (bioA), biotin synthetase (bioB), 7-keto-8-amino-pelargonic acid synthetase (bioF), bioC protein, and dethiobiotin synthetase (bioD), complete cds.
AFFX-BioDn-3_at	4575.1	P	0.000052	E. coli GEN=bioD DB_XREF=gb:J04423.1 NOTE=SIF corresponding to nucleotides 5286-5570 of gb:J04423.1, not 100% identical DEF=E.coli 7,8-diamino-pelargonic acid (bioA), biotin synthetase (bioB), 7-keto-8-amino-pelargonic acid synthetase (bioF), bioC protein, and dethiobiotin synthetase (bioD), complete cds.
AFFX-CreX-5_at	11606.6	P	0.000052	Bacteriophage P1 GEN=cre DB_XREF=gb:X03453.1 NOTE=SIF corresponding to nucleotides 513-1047 of gb:X03453.1 DEF=Bacteriophage P1 cre gene for recombinase protein.
AFFX-CreX-3_at	12741.2	P	0.000044	Bacteriophage P1 GEN=cre DB_XREF=gb:X03453.1 NOTE=SIF corresponding to nucleotides 1089-1495 of gb:X03453.1 DEF=Bacteriophage P1 cre gene for recombinase protein.
AFFX-DapX-5_at	489.9	P	0.000052	B. subtilis GEN=dapB DB_XREF=gb:L38424.1 NOTE=SIF corresponding to nucleotides 1428-1926 of gb:L38424.1 DEF=Bacillus subtilis dihydropicolinate reductase (jojE) gene, complete cds; poly(A) polymerase (jojI) gene, complete cds; biotin acetyl-CoA-carboxylase ligase (birA) gene, complete cds; jojC, jojD, jojF, jojG, jojH genes, complete cds s.
AFFX-DapX-M_at	1007.4	P	0.000110	B. subtilis GEN=dapB, jojF DB_XREF=gb:L38424.1 NOTE=SIF corresponding to nucleotides 2020-2580 of gb:L38424.1, not 100% identical DEF=Bacillus subtilis dihydropicolinate reductase (jojE) gene, complete cds; poly(A) polymerase (jojI) gene, complete cds; biotin acetyl-CoA-carboxylase ligase (birA) gene, complete cds; jojC, jojD, jojF, jojG, jojH genes, complete cds s.
AFFX-DapX-3_at	1551.7	P	0.000044	B. subtilis GEN=jojG DB_XREF=gb:L38424.1 NOTE=SIF corresponding to nucleotides 2684-3130 of gb:L38424.1 DEF=Bacillus subtilis dihydropicolinate reductase (jojE) gene, complete cds; poly(A) polymerase (jojI) gene, complete cds; biotin acetyl-CoA-carboxylase ligase (birA) gene, complete cds; jojC, jojD, jojF, jojG, jojH genes, complete cds s.
AFFX-LysX-5_at	101.9	P	0.000169	B. subtilis GEN=lys DB_XREF=gb:X17013.1 NOTE=SIF corresponding to nucleotides 387-658 of gb:X17013.1, not 100% identical DEF=B subtilis lys gene for diaminopimelate decarboxylase (EC 4.1.1.20).
AFFX-LysX-M_at	146.5	P	0.000147	B. subtilis GEN=lys DB_XREF=gb:X17013.1 NOTE=SIF corresponding to nucleotides 720-990 of gb:X17013.1, not 100% identical DEF=B subtilis lys gene for diaminopimelate decarboxylase (EC 4.1.1.20).
AFFX-LysX-3_at	259.1	P	0.000060	B. subtilis GEN=lys DB_XREF=gb:X17013.1 NOTE=SIF corresponding to nucleotides 1061-1343 of gb:X17013.1, not 100% identical DEF=B subtilis lys gene for diaminopimelate decarboxylase (EC 4.1.1.20).
AFFX-PheX-5_at	181.3	P	0.000044	B. subtilis GEN=pheA DB_XREF=gb:M24537.1 NOTE=SIF corresponding to nucleotides 2028-2375 of gb:M24537.1, not 100% identical DEF=Bacillus subtillis sporulation protein (spoOB), GTP-binding protein (obg), phenylalanine biosynthesis associated protein (pheB), and monofunctional prephenate dehydratase (pheA) genes, complete cds.
AFFX-PheX-M_at	211.3	P	0.000044	B. subtilis GEN=pheA DB_XREF=gb:M24537.1 NOTE=SIF corresponding to nucleotides 2437-2828 of gb:M24537.1 DEF=Bacillus subtillis sporulation protein (spoOB), GTP-binding protein (obg), phenylalanine biosynthesis associated protein (pheB), and monofunctional prephenate dehydratase (pheA) genes, complete cds.
AFFX-PheX-3_at	167.8	P	0.000044	B. subtilis GEN=pheB DB_XREF=gb:M24537.1 NOTE=SIF corresponding to nucleotides 2885-3326 of gb:M24537.1, not 100% identical DEF=Bacillus subtillis sporulation protein (spoOB), GTP-binding protein (obg), phenylalanine biosynthesis associated protein (pheB), and monofunctional prephenate dehydratase (pheA) genes, complete cds.
AFFX-ThrX-5_at	96.3	P	0.000147	B. subtilis GEN=thrC DB_XREF=gb:X04603.1 NOTE=SIF corresponding to nucleotides 288-932 of gb:X04603.1 DEF=B. subtilis thrB and thrC genes for homoserine kinase and threonine synthase (EC 2.7.1.39 and EC 4.2.99.2, respectively).
AFFX-ThrX-M_at	210.9	P	0.000052	B. subtilis GEN=thrC, thrB DB_XREF=gb:X04603.1 NOTE=SIF corresponding to nucleotides 995-1562 of gb:X04603.1, not 100% identical DEF=B. subtilis thrB and thrC genes for homoserine kinase and threonine synthase (EC 2.7.1.39 and EC 4.2.99.2, respectively).
AFFX-ThrX-3_at	443.2	P	0.000044	B. subtilis GEN=thrB DB_XREF=gb:X04603.1 NOTE=SIF corresponding to nucleotides 1689-2151 of gb:X04603.1 DEF=B. subtilis thrB and thrC genes for homoserine kinase and threonine synthase (EC 2.7.1.39 and EC 4.2.99.2, respectively).
AFFX-TrpnX-5_at	11.4	P	0.026101	B. subtilis GEN=trpE, trpD DB_XREF=gb:K01391.1 NOTE=SIF corresponding to nucleotides 1953-2483 of gb:K01391.1, not 100% identical DEF=B.subtilis tryptophan (trp) operon, complete cds.
AFFX-TrpnX-M_at	2.0	A	0.852061	B. subtilis GEN=trpD, trpC DB_XREF=gb:K01391.1 NOTE=SIF corresponding to nucleotides 2880-3359 of gb:K01391.1, not 100% identical DEF=B.subtilis tryptophan (trp) operon, complete cds.
AFFX-TrpnX-3_at	0.5	A	0.976081	B. subtilis GEN=trpC, trpF DB_XREF=gb:K01391.1 NOTE=SIF corresponding to nucleotides 3790-4368 of gb:K01391.1, not 100% identical DEF=B.subtilis tryptophan (trp) operon, complete cds.
AFFX-r2-Ec-bioB-5_at	344.0	P	0.000244	E. coli GEN=bioB DB_XREF=gb:J04423.1 NOTE=SIF corresponding to nucleotides 2071-2304 of gb:J04423.1 DEF=E.coli 7,8-diamino-pelargonic acid (bioA), biotin synthetase (bioB), 7-keto-8-amino-pelargonic acid synthetase (bioF), bioC protein, and dethiobiotin synthetase (bioD), complete cds.
AFFX-r2-Ec-bioB-M_at	530.5	P	0.000244	E. coli GEN=bioB DB_XREF=gb:J04423.1 NOTE=SIF corresponding to nucleotides 2393-2682 of gb:J04423.1 DEF=E.coli 7,8-diamino-pelargonic acid (bioA), biotin synthetase (bioB), 7-keto-8-amino-pelargonic acid synthetase (bioF), bioC protein, and dethiobiotin synthetase (bioD), complete cds.
AFFX-r2-Ec-bioB-3_at	409.8	P	0.000244	E. coli GEN=bioB DB_XREF=gb:J04423.1 NOTE=SIF corresponding to nucleotides 2772-3004 of gb:J04423.1 DEF=E.coli 7,8-diamino-pelargonic acid (bioA), biotin synthetase (bioB), 7-keto-8-amino-pelargonic acid synthetase (bioF), bioC protein, and dethiobiotin synthetase (bioD), complete cds.
AFFX-r2-Ec-bioC-5_at	1265.2	P	0.000244	E. coli GEN=bioC DB_XREF=gb:J04423.1 NOTE=SIF corresponding to nucleotides 4257-4573 of gb:J04423.1 DEF=E.coli 7,8-diamino-pelargonic acid (bioA), biotin synthetase (bioB), 7-keto-8-amino-pelargonic acid synthetase (bioF), bioC protein, and dethiobiotin synthetase (bioD), complete cds.
AFFX-r2-Ec-bioC-3_at	1437.5	P	0.000244	E. coli GEN=bioC DB_XREF=gb:J04423.1 NOTE=SIF corresponding to nucleotides 4608-4883 of gb:J04423.1 DEF=E.coli 7,8-diamino-pelargonic acid (bioA), biotin synthetase (bioB), 7-keto-8-amino-pelargonic acid synthetase (bioF), bioC protein, and dethiobiotin synthetase (bioD), complete cds.
AFFX-r2-Ec-bioD-5_at	4437.8	P	0.000244	E. coli GEN=bioD DB_XREF=gb:J04423.1 NOTE=SIF corresponding to nucleotides 5024-5244 of gb:J04423.1 DEF=E.coli 7,8-diamino-pelargonic acid (bioA), biotin synthetase (bioB), 7-keto-8-amino-pelargonic acid synthetase (bioF), bioC protein, and dethiobiotin synthetase (bioD), complete cds.
AFFX-r2-Ec-bioD-3_at	5345.4	P	0.000244	E. coli GEN=bioD DB_XREF=gb:J04423.1 NOTE=SIF corresponding to nucleotides 5312-5559 of gb:J04423.1, not 100% identical DEF=E.coli 7,8-diamino-pelargonic acid (bioA), biotin synthetase (bioB), 7-keto-8-amino-pelargonic acid synthetase (bioF), bioC protein, and dethiobiotin synthetase (bioD), complete cds.
AFFX-r2-P1-cre-5_at	13321.9	P	0.000244	Bacteriophage P1 GEN=cre DB_XREF=gb:X03453.1 NOTE=SIF corresponding to nucleotides 581-1001 of gb:X03453.1 DEF=Bacteriophage P1 cre gene for recombinase protein.
AFFX-r2-P1-cre-3_at	16977.6	P	0.000244	Bacteriophage P1 GEN=cre DB_XREF=gb:X03453.1 NOTE=SIF corresponding to nucleotides 1032-1270 of gb:X03453.1 DEF=Bacteriophage P1 cre gene for recombinase protein.
AFFX-r2-Bs-dap-5_at	697.4	P	0.000244	B. subtilis GEN=dapB DB_XREF=gb:L38424.1 NOTE=SIF corresponding to nucleotides 1439-1846 of gb:L38424.1 DEF=Bacillus subtilis dihydropicolinate reductase (jojE) gene, complete cds; poly(A) polymerase (jojI) gene, complete cds; biotin acetyl-CoA-carboxylase ligase (birA) gene, complete cds; jojC, jojD, jojF, jojG, jojH genes, complete cds s.
AFFX-r2-Bs-dap-M_at	1116.1	P	0.000244	B. subtilis GEN=dapB, jojF DB_XREF=gb:L38424.1 NOTE=SIF corresponding to nucleotides 2055-2578 of gb:L38424.1, not 100% identical DEF=Bacillus subtilis dihydropicolinate reductase (jojE) gene, complete cds; poly(A) polymerase (jojI) gene, complete cds; biotin acetyl-CoA-carboxylase ligase (birA) gene, complete cds; jojC, jojD, jojF, jojG, jojH genes, complete cds s.
AFFX-r2-Bs-dap-3_at	1612.0	P	0.000244	B. subtilis GEN=jojG DB_XREF=gb:L38424.1 NOTE=SIF corresponding to nucleotides 2634-3089 of gb:L38424.1 DEF=Bacillus subtilis dihydropicolinate reductase (jojE) gene, complete cds; poly(A) polymerase (jojI) gene, complete cds; biotin acetyl-CoA-carboxylase ligase (birA) gene, complete cds; jojC, jojD, jojF, jojG, jojH genes, complete cds s.
AFFX-r2-Bs-lys-5_at	169.3	P	0.000244	B. subtilis GEN=lys DB_XREF=gb:X17013.1 NOTE=SIF corresponding to nucleotides 411-659 of gb:X17013.1, not 100% identical DEF=B subtilis lys gene for diaminopimelate decarboxylase (EC 4.1.1.20).
AFFX-r2-Bs-lys-M_at	159.5	P	0.000244	B. subtilis GEN=lys DB_XREF=gb:X17013.1 NOTE=SIF corresponding to nucleotides 673-1002 of gb:X17013.1, not 100% identical DEF=B subtilis lys gene for diaminopimelate decarboxylase (EC 4.1.1.20).
AFFX-r2-Bs-lys-3_at	127.3	P	0.000244	B. subtilis GEN=lys DB_XREF=gb:X17013.1 NOTE=SIF corresponding to nucleotides 1008-1263 of gb:X17013.1, not 100% identical DEF=B subtilis lys gene for diaminopimelate decarboxylase (EC 4.1.1.20).
AFFX-r2-Bs-phe-5_at	275.3	P	0.000244	B. subtilis GEN=pheA DB_XREF=gb:M24537.1 NOTE=SIF corresponding to nucleotides 2116-2382 of gb:M24537.1 DEF=Bacillus subtillis sporulation protein (spoOB), GTP-binding protein (obg), phenylalanine biosynthesis associated protein (pheB), and monofunctional prephenate dehydratase (pheA) genes, complete cds.
AFFX-r2-Bs-phe-M_at	250.6	P	0.000244	B. subtilis GEN=pheA DB_XREF=gb:M24537.1 NOTE=SIF corresponding to nucleotides 2484-2875 of gb:M24537.1 DEF=Bacillus subtillis sporulation protein (spoOB), GTP-binding protein (obg), phenylalanine biosynthesis associated protein (pheB), and monofunctional prephenate dehydratase (pheA) genes, complete cds.
AFFX-r2-Bs-phe-3_at	307.4	P	0.000244	B. subtilis GEN=pheB DB_XREF=gb:M24537.1 NOTE=SIF corresponding to nucleotides 2897-3200 of gb:M24537.1, not 100% identical DEF=Bacillus subtillis sporulation protein (spoOB), GTP-binding protein (obg), phenylalanine biosynthesis associated protein (pheB), and monofunctional prephenate dehydratase (pheA) genes, complete cds.
AFFX-r2-Bs-thr-3_s_at	476.0	P	0.000244	B. subtilis GEN=thrB DB_XREF=gb:X04603.1 NOTE=SIF corresponding to nucleotides 1735-2143 of gb:X04603.1 DEF=B. subtilis thrB and thrC genes for homoserine kinase and threonine synthase.
AFFX-r2-Bs-thr-M_s_at	279.0	P	0.000244	B. subtilis GEN=thrC, thrB DB_XREF=gb:X04603.1 NOTE=SIF corresponding to nucleotides 1045-1556 of gb:X04603.1 DEF=B. subtilis thrB and thrC genes for homoserine kinase and threonine synthase.
AFFX-r2-Bs-thr-5_s_at	130.3	P	0.000244	B. subtilis GEN=thrC DB_XREF=gb:X04603.1 NOTE=SIF corresponding to nucleotides 290-888 of gb:X04603.1 DEF=B. subtilis thrB and thrC genes for homoserine kinase and threonine synthase.
AFFX-HUMISGF3A/M97935_5_at	51.0	P	0.000754	M97935 Homo sapiens transcription factor ISGF-3 mRNA, complete cds (_5, _MA, MB, _3 represent transcript regions 5 prime, MiddleA, MiddleB, and 3 prime respectively)
AFFX-HUMISGF3A/M97935_MA_at	192.1	P	0.000127	M97935 Homo sapiens transcription factor ISGF-3 mRNA, complete cds (_5, _MA, MB, _3 represent transcript regions 5 prime, MiddleA, MiddleB, and 3 prime respectively)
AFFX-HUMISGF3A/M97935_MB_at	248.1	P	0.000044	M97935 Homo sapiens transcription factor ISGF-3 mRNA, complete cds (_5, _MA, MB, _3 represent transcript regions 5 prime, MiddleA, MiddleB, and 3 prime respectively)
AFFX-HUMISGF3A/M97935_3_at	2888.8	P	0.000044	M97935 Homo sapiens transcription factor ISGF-3 mRNA, complete cds (_5, _MA, MB, _3 represent transcript regions 5 prime, MiddleA, MiddleB, and 3 prime respectively)
AFFX-HUMRGE/M10098_5_at	1975.6	P	0.000044	M10098 Human 18S rRNA gene, complete (_5, _M, _3 represent transcript regions 5 prime, Middle, and 3 prime respectively)
AFFX-HUMRGE/M10098_M_at	951.8	P	0.000044	M10098 Human 18S rRNA gene, complete (_5, _M, _3 represent transcript regions 5 prime, Middle, and 3 prime respectively)
AFFX-HUMRGE/M10098_3_at	2968.8	P	0.000044	M10098 Human 18S rRNA gene, complete (_5, _M, _3 represent transcript regions 5 prime, Middle, and 3 prime respectively)
AFFX-HUMGAPDH/M33197_5_at	12370.6	P	0.000044	M33197 Human glyceraldehyde-3-phosphate dehydrogenase (GAPDH) mRNA, complete cds (_5, _M, _3 represent transcript regions 5 prime, Middle, and 3 prime respectively)
AFFX-HUMGAPDH/M33197_M_at	12270.4	P	0.000044	M33197 Human glyceraldehyde-3-phosphate dehydrogenase (GAPDH) mRNA, complete cds (_5, _M, _3 represent transcript regions 5 prime, Middle, and 3 prime respectively)
AFFX-HUMGAPDH/M33197_3_at	12123.1	P	0.000044	M33197 Human glyceraldehyde-3-phosphate dehydrogenase (GAPDH) mRNA, complete cds (_5, _M, _3 represent transcript regions 5 prime, Middle, and 3 prime respectively)
AFFX-HSAC07/X00351_5_at	6431.5	P	0.000044	X00351 Human mRNA for beta-actin (_5, _M, _3 represent transcript regions 5 prime, Middle, and 3 prime respectively)
AFFX-HSAC07/X00351_M_at	7530.7	P	0.000044	X00351 Human mRNA for beta-actin (_5, _M, _3 represent transcript regions 5 prime, Middle, and 3 prime respectively)
AFFX-HSAC07/X00351_3_at	11138.3	P	0.000044	X00351 Human mRNA for beta-actin (_5, _M, _3 represent transcript regions 5 prime, Middle, and 3 prime respectively)
AFFX-M27830_5_at	2729.7	P	0.000044	M27830 Human 28S ribosomal RNA gene, complete cds (_5, _M, _3 represent transcript regions 5 prime, Middle, and 3 prime respectively)
AFFX-M27830_M_at	1029.2	P	0.001410	M27830 Human 28S ribosomal RNA gene, complete cds (_5, _M, _3 represent transcript regions 5 prime, Middle, and 3 prime respectively)
AFFX-M27830_3_at	3.4	A	0.686307	M27830 Human 28S ribosomal RNA gene, complete cds (_5, _M, _3 represent transcript regions 5 prime, Middle, and 3 prime respectively)
AFFX-hum_alu_at	18761.9	P	0.000000	U14573 Human Alu-Sq subfamily consensus sequence.
1007_s_at	1739.2	P	0.000219	U48705 /FEATURE=mRNA /DEFINITION=HSU48705 Human receptor tyrosine kinase DDR gene, complete cds
1053_at	279.6	P	0.000322	M87338 /FEATURE= /DEFINITION=HUMA1SBU Human replication factor C, 40-kDa subunit (A1) mRNA, complete cds
117_at	20.0	A	0.175989	X51757 /FEATURE=cds /DEFINITION=HSP70B Human heat-shock protein HSP70B gene
121_at	156.2	P	0.003067	X69699 /FEATURE= /DEFINITION=HSPAX8A H.sapiens Pax8 mRNA
1255_g_at	10.2	A	0.162935	L36861 /FEATURE=expanded_cds /DEFINITION=HUMGCAPB Homo sapiens guanylate cyclase activating protein (GCAP) gene exons 1-4, complete cds
1294_at	48.8	P	0.024711	L13852 /FEATURE= /DEFINITION=HUME1URP Homo sapiens ubiquitin-activating enzyme E1 related protein mRNA, complete cds
1316_at	46.5	P	0.000805	X55005 /FEATURE=mRNA /DEFINITION=HSCERBAR Homo sapiens mRNA for thyroid hormone receptor alpha 1 THRA1, (c-erbA-1 gene)
1320_at	33.3	A	0.107263	X79510 /FEATURE=cds /DEFINITION=HSPTPD1 H.sapiens mRNA for protein-tyrosine-phosphatase D1
1405_i_at	65.2	P	0.001432	M21121 /FEATURE= /DEFINITION=HUMTCSM Human T cell-specific protein (RANTES) mRNA, complete cds
1431_at	18.9	P	0.021849	J02843 /FEATURE=cds /DEFINITION=HUMCYPIIE Human cytochrome P450IIE1 (ethanol-inducible) gene, complete cds
1438_at	12.5	A	0.541184	X75208 /FEATURE=cds /DEFINITION=HSPTKR H.sapiens HEK2 mRNA for protein tyrosine kinase receptor
1487_at	313.5	P	0.005643	L38487 /FEATURE=mRNA /DEFINITION=HUMHERRA1 Human estrogen receptor-related protein (hERRa1) mRNA, 3 end, partial cds
1494_f_at	23.7	M	0.060419	M33318 /FEATURE=mRNA /DEFINITION=HUMCPIIA3A Human cytochrome P450IIA3 (CYP2A3) mRNA, complete cds
1598_g_at	100.6	A	0.098054	L13720 /FEATURE= /DEFINITION=HUMGAS Homo sapiens growth-arrest-specific protein (gas) mRNA, complete cds
160020_at	30.1	P	0.017001	Z48481 /FEATURE=cds /DEFINITION=HSMMPM1 H.sapiens mRNA for membrane-type matrix metalloproteinase 1 /NOTE=replacement of probe set 1301_s_at
1729_at	429.0	P	0.000219	L41690 /FEATURE= /DEFINITION=HUMTRADD Homo sapiens TNF receptor-1 associated protein (TRADD) mRNA, 3 end of cds
1773_at	50.9	A	0.138725	L00635 /FEATURE= /DEFINITION=HUMFPTB Human farnesyl-protein transferase beta-subunit mRNA, complete cds
177_at	14.6	A	0.098054	U38545 /FEATURE= /DEFINITION=HSU38545 Human ARF-activated phosphatidylcholine-specific phospholipase D1a (hPLD1) mRNA, complete cds
179_at	142.5	P	0.011447	U38980 /FEATURE= /DEFINITION=U38980 Human PMS2 related (hPMSR6) mRNA, complete cds
1861_at	200.9	P	0.000562	U66879 /FEATURE= /DEFINITION=HSU66879 Human Bcl-2 binding component 6 (bbc6) mRNA, complete cds
200000_s_at	661.4	P	0.000244	gb:NM_006445.1 /DEF=Homo sapiens U5 snRNP-specific protein (220 kD), ortholog of S. cerevisiae Prp8p (PRP8), mRNA. /FEA=mRNA /GEN=PRP8 /PROD=U5 snRNP-specific protein (220 kD), ortholog ofS. cerevisiae Prp8p /DB_XREF=gi:5453983 /UG=Hs.181368 U5 snRNP-specific protein (220 kD), ortholog of S. cerevisiae Prp8p /FL=gb:AB007510.1 gb:AF092565.1 gb:NM_006445.1
200001_at	1626.7	P	0.000244	gb:NM_001749.1 /DEF=Homo sapiens calpain 4, small subunit (30K) (CAPN4), mRNA. /FEA=mRNA /GEN=CAPN4 /PROD=calpain 4 small subunit /DB_XREF=gi:4502564 /UG=Hs.74451 calpain 4, small subunit (30K) /FL=gb:BC000592.1 gb:NM_001749.1
200002_at	9294.7	P	0.000244	gb:NM_007209.1 /DEF=Homo sapiens ribosomal protein L35 (RPL35), mRNA. /FEA=mRNA /GEN=RPL35 /PROD=ribosomal protein L35 /DB_XREF=gi:6005859 /UG=Hs.182825 ribosomal protein L35 /FL=gb:BC000348.1 gb:U12465.1 gb:NM_007209.1
200003_s_at	13986.0	P	0.000244	gb:NM_000991.1 /DEF=Homo sapiens ribosomal protein L28 (RPL28), mRNA. /FEA=mRNA /GEN=RPL28 /PROD=ribosomal protein L28 /DB_XREF=gi:4506626 /UG=Hs.4437 ribosomal protein L28 /FL=gb:BC000072.1 gb:NM_000991.1 gb:U14969.1
200004_at	5018.5	P	0.000244	gb:NM_001418.1 /DEF=Homo sapiens eukaryotic translation initiation factor 4 gamma, 2 (EIF4G2), mRNA. /FEA=mRNA /GEN=EIF4G2 /PROD=eukaryotic translation initiation factor 4gamma, 2 /DB_XREF=gi:4503538 /UG=Hs.183684 eukaryotic translation initiation factor 4 gamma, 2 /FL=gb:U73824.1 gb:U76111.1 gb:NM_001418.1
200005_at	1642.9	P	0.000244	gb:NM_003753.1 /DEF=Homo sapiens eukaryotic translation initiation factor 3, subunit 7 (zeta, 6667kD) (EIF3S7), mRNA. /FEA=mRNA /GEN=EIF3S7 /PROD=eukaryotic translation initiation factor 3,subunit 7 (zeta, 6667kD) /DB_XREF=gi:4503522 /UG=Hs.55682 eukaryotic translation initiation factor 3, subunit 7 (zeta, 6667kD) /FL=gb:BC000328.1 gb:BC000469.1 gb:U54558.1 gb:NM_003753.1
200006_at	5595.5	P	0.000244	gb:NM_007262.1 /DEF=Homo sapiens RNA-binding protein regulatory subunit (DJ-1), mRNA. /FEA=mRNA /GEN=DJ-1 /PROD=RNA-binding protein regulatory subunit /DB_XREF=gi:6005748 /UG=Hs.10958 RNA-binding protein regulatory subunit /FL=gb:AF021819.1 gb:NM_007262.1 gb:D61380.1
200007_at	4151.9	P	0.000244	gb:NM_003134.1 /DEF=Homo sapiens signal recognition particle 14kD (homologous Alu RNA-binding protein) (SRP14), mRNA. /FEA=mRNA /GEN=SRP14 /PROD=signal recognition particle 14kD (homologous AluRNA-binding protein) /DB_XREF=gi:4507210 /UG=Hs.180394 signal recognition particle 14kD (homologous Alu RNA-binding protein) /FL=gb:NM_003134.1 gb:U07857.1
200008_s_at	880.8	P	0.000244	gb:D13988.1 /DEF=Human rab GDI mRNA, complete cds. /FEA=mRNA /PROD=human rab GDI /DB_XREF=gi:285974 /UG=Hs.56845 GDP dissociation inhibitor 2 /FL=gb:BC005145.1 gb:D13988.1 gb:NM_001494.2
200009_at	3546.7	P	0.000244	gb:NM_001494.2 /DEF=Homo sapiens GDP dissociation inhibitor 2 (GDI2), mRNA. /FEA=mRNA /GEN=GDI2 /PROD=GDP dissociation inhibitor 2 /DB_XREF=gi:6598322 /UG=Hs.56845 GDP dissociation inhibitor 2 /FL=gb:BC005145.1 gb:D13988.1 gb:NM_001494.2
200010_at	9368.8	P	0.000244	gb:NM_000975.1 /DEF=Homo sapiens ribosomal protein L11 (RPL11), mRNA. /FEA=mRNA /GEN=RPL11 /PROD=ribosomal protein L11 /DB_XREF=gi:4506594 /UG=Hs.179943 ribosomal protein L11 /FL=gb:L05092.1 gb:NM_000975.1
200011_s_at	2578.8	P	0.000244	gb:NM_001659.1 /DEF=Homo sapiens ADP-ribosylation factor 3 (ARF3), mRNA. /FEA=mRNA /GEN=ARF3 /PROD=ADP-ribosylation factor 3 /DB_XREF=gi:4502202 /UG=Hs.119177 ADP-ribosylation factor 3 /FL=gb:M74491.1 gb:NM_001659.1
200012_x_at	7759.1	P	0.000244	gb:NM_000982.1 /DEF=Homo sapiens ribosomal protein L21 (gene or pseudogene) (RPL21), mRNA. /FEA=mRNA /GEN=RPL21 /PROD=ribosomal protein L21 (gene or pseudogene) /DB_XREF=gi:4506610 /UG=Hs.184108 ribosomal protein L21 /FL=gb:BC001603.1 gb:NM_000982.1 gb:U14967.1 gb:U25789.1
200013_at	10402.6	P	0.000244	gb:NM_000986.1 /DEF=Homo sapiens ribosomal protein L24 (RPL24), mRNA. /FEA=mRNA /GEN=RPL24 /PROD=ribosomal protein L24 /DB_XREF=gi:4506618 /UG=Hs.184582 ribosomal protein L24 /FL=gb:BC000690.1 gb:M94314.1 gb:NM_000986.1
200014_s_at	3081.7	P	0.000244	gb:NM_004500.1 /DEF=Homo sapiens heterogeneous nuclear ribonucleoprotein C (C1C2) (HNRPC), mRNA. /FEA=mRNA /GEN=HNRPC /PROD=heterogeneous nuclear ribonucleoprotein C(C1C2) /DB_XREF=gi:4758543 /UG=Hs.182447 heterogeneous nuclear ribonucleoprotein C (C1C2) /FL=gb:BC003394.1 gb:M16342.1 gb:NM_004500.1
200015_s_at	2840.3	P	0.000732	gb:NM_004404.1 /DEF=Homo sapiens neural precursor cell expressed, developmentally down-regulated 5 (NEDD5), mRNA. /FEA=mRNA /GEN=NEDD5 /PROD=neural precursor cell expressed, developmentallydown-regulated 5 /DB_XREF=gi:4758157 /UG=Hs.155595 neural precursor cell expressed, developmentally down-regulated 5 /FL=gb:D28540.1 gb:NM_004404.1 gb:D63878.1
200016_x_at	11396.8	P	0.000244	gb:NM_002136.1 /DEF=Homo sapiens heterogeneous nuclear ribonucleoprotein A1 (HNRPA1), mRNA. /FEA=mRNA /GEN=HNRPA1 /PROD=heterogeneous nuclear ribonucleoprotein A1 /DB_XREF=gi:4504444 /UG=Hs.249495 heterogeneous nuclear ribonucleoprotein A1 /FL=gb:NM_002136.1
200017_at	11887.7	P	0.000244	gb:NM_002954.1 /DEF=Homo sapiens ribosomal protein S27a (RPS27A), mRNA. /FEA=mRNA /GEN=RPS27A /PROD=ribosomal protein S27a /DB_XREF=gi:4506712 /UG=Hs.3297 ribosomal protein S27a /FL=gb:BC001392.1 gb:BC005328.1 gb:NM_002954.1
200018_at	9627.2	P	0.000244	gb:NM_001017.1 /DEF=Homo sapiens ribosomal protein S13 (RPS13), mRNA. /FEA=mRNA /GEN=RPS13 /PROD=ribosomal protein S13 /DB_XREF=gi:4506684 /UG=Hs.165590 ribosomal protein S13 /FL=gb:BC000475.1 gb:L01124.1 gb:NM_001017.1
200019_s_at	8126.4	P	0.000244	gb:NM_001997.1 /DEF=Homo sapiens Finkel-Biskis-Reilly murine sarcoma virus (FBR-MuSV) ubiquitously expressed (fox derived); ribosomal protein S30 (FAU), mRNA. /FEA=mRNA /GEN=FAU /PROD=Finkel-Biskis-Reilly murine sarcoma virus(FBR-MuSV) ubiquitously expressed (fox derived); ribosomalprotein S30 /DB_XREF=gi:4503658 /UG=Hs.177415 Finkel-Biskis-Reilly murine sarcoma virus (FBR-MuSV) ubiquitously expr…
200020_at	1317.9	P	0.000244	gb:NM_007375.1 /DEF=Homo sapiens TAR DNA binding protein (TARDBP), mRNA. /FEA=mRNA /GEN=TARDBP /PROD=TAR DNA binding protein /DB_XREF=gi:6678270 /UG=Hs.193989 TAR DNA binding protein /FL=gb:AL050265.1 gb:NM_007375.1 gb:U23731.1
200021_at	10338.2	P	0.000732	gb:NM_005507.1 /DEF=Homo sapiens cofilin 1 (non-muscle) (CFL1), mRNA. /FEA=mRNA /GEN=CFL1 /PROD=cofilin 1 (non-muscle) /DB_XREF=gi:5031634 /UG=Hs.180370 cofilin 1 (non-muscle) /FL=gb:NM_005507.1
200022_at	10914.6	P	0.000244	gb:NM_000979.1 /DEF=Homo sapiens ribosomal protein L18 (RPL18), mRNA. /FEA=mRNA /GEN=RPL18 /PROD=ribosomal protein L18 /DB_XREF=gi:4506606 /UG=Hs.75458 ribosomal protein L18 /FL=gb:BC000374.1 gb:L11566.1 gb:NM_000979.1
200023_s_at	2927.2	P	0.000244	gb:NM_003754.1 /DEF=Homo sapiens eukaryotic translation initiation factor 3, subunit 5 (epsilon, 47kD) (EIF3S5), mRNA. /FEA=mRNA /GEN=EIF3S5 /PROD=eukaryotic translation initiation factor 3,subunit 5 (epsilon, 47kD) /DB_XREF=gi:4503518 /UG=Hs.7811 eukaryotic translation initiation factor 3, subunit 5 (epsilon, 47kD) /FL=gb:BC000490.1 gb:U94855.1 gb:NM_003754.1
200024_at	7540.6	P	0.000244	gb:NM_001009.1 /DEF=Homo sapiens ribosomal protein S5 (RPS5), mRNA. /FEA=mRNA /GEN=RPS5 /PROD=ribosomal protein S5 /DB_XREF=gi:4506728 /UG=Hs.76194 ribosomal protein S5 /FL=gb:NM_001009.1 gb:U14970.1
200025_s_at	9116.1	P	0.000244	gb:NM_000988.1 /DEF=Homo sapiens ribosomal protein L27 (RPL27), mRNA. /FEA=mRNA /GEN=RPL27 /PROD=ribosomal protein L27 /DB_XREF=gi:4506622 /UG=Hs.111611 ribosomal protein L27 /FL=gb:BC002588.1 gb:L05094.1 gb:L19527.1 gb:NM_000988.1
200026_at	9367.7	P	0.000244	gb:NM_000995.1 /DEF=Homo sapiens ribosomal protein L34 (RPL34), mRNA. /FEA=mRNA /GEN=RPL34 /PROD=ribosomal protein L34 /DB_XREF=gi:4506636 /UG=Hs.250895 ribosomal protein L34 /FL=gb:L38941.1 gb:BC001773.1 gb:NM_000995.1
200027_at	2050.4	P	0.000244	gb:NM_004539.2 /DEF=Homo sapiens asparaginyl-tRNA synthetase (NARS), mRNA. /FEA=mRNA /GEN=NARS /PROD=asparaginyl-tRNA synthetase /DB_XREF=gi:7262387 /UG=Hs.181311 asparaginyl-tRNA synthetase /FL=gb:BC001687.1 gb:D84273.1 gb:NM_004539.2
200028_s_at	2115.7	P	0.000244	gb:NM_020151.1 /DEF=Homo sapiens GTT1 protein (GTT1), mRNA. /FEA=mRNA /GEN=GTT1 /PROD=GTT1 protein /DB_XREF=gi:9910251 /UG=Hs.283722 GTT1 protein /FL=gb:AF270647.1 gb:NM_020151.1
200029_at	6568.1	P	0.000244	gb:NM_000981.1 /DEF=Homo sapiens ribosomal protein L19 (RPL19), mRNA. /FEA=mRNA /GEN=RPL19 /PROD=ribosomal protein L19 /DB_XREF=gi:4506608 /UG=Hs.252723 ribosomal protein L19 /FL=gb:BC000530.1 gb:NM_000981.1
200030_s_at	6448.2	P	0.000244	gb:NM_002635.1 /DEF=Homo sapiens solute carrier family 25 (mitochondrial carrier; phosphate carrier), member 3 (SLC25A3), nuclear gene encoding mitochondrial protein, transcript variant 1b, mRNA. /FEA=mRNA /GEN=SLC25A3 /PROD=phosphate carrier precursor isoform 1b /DB_XREF=gi:4505774 /UG=Hs.78713 solute carrier family 25 (mitochondrial carrier; phosphate carrier), member 3 /FL=gb:BC000998.1 gb:BC0…
200031_s_at	12891.0	P	0.000244	gb:NM_001015.1 /DEF=Homo sapiens ribosomal protein S11 (RPS11), mRNA. /FEA=mRNA /GEN=RPS11 /PROD=ribosomal protein S11 /DB_XREF=gi:4506680 /UG=Hs.182740 ribosomal protein S11 /FL=gb:NM_001015.1
200032_s_at	11133.8	P	0.000244	gb:NM_000661.1 /DEF=Homo sapiens ribosomal protein L9 (RPL9), mRNA. /FEA=mRNA /GEN=RPL9 /PROD=ribosomal protein L9 /DB_XREF=gi:4506664 /UG=Hs.157850 ribosomal protein L9 /FL=gb:U09953.1 gb:NM_000661.1
200033_at	9253.4	P	0.000244	gb:NM_004396.2 /DEF=Homo sapiens DEADH (Asp-Glu-Ala-AspHis) box polypeptide 5 (RNA helicase, 68kD) (DDX5), mRNA. /FEA=mRNA /GEN=DDX5 /PROD=DEADH (Asp-Glu-Ala-AspHis) box polypeptide 5 /DB_XREF=gi:13514826 /UG=Hs.76053 DEADH (Asp-Glu-Ala-AspHis) box polypeptide 5 (RNA helicase, 68kD) /FL=gb:NM_004396.2
200034_s_at	10303.6	P	0.000244	gb:NM_000970.1 /DEF=Homo sapiens ribosomal protein L6 (RPL6), mRNA. /FEA=mRNA /GEN=RPL6 /PROD=ribosomal protein L6 /DB_XREF=gi:4506656 /UG=Hs.174131 ribosomal protein L6 /FL=gb:BC004138.1 gb:D17554.1 gb:NM_000970.1 gb:AF261087.1
200035_at	220.5	P	0.010742	gb:NM_015343.1 /DEF=Homo sapiens hypothetical protein (HSA011916), mRNA. /FEA=mRNA /GEN=HSA011916 /PROD=hypothetical protein /DB_XREF=gi:7661721 /UG=Hs.84359 hypothetical protein /FL=gb:NM_015343.1
200036_s_at	7086.7	P	0.000244	gb:NM_007104.2 /DEF=Homo sapiens ribosomal protein L10a (RPL10A), mRNA. /FEA=mRNA /GEN=RPL10A /PROD=ribosomal protein L10a /DB_XREF=gi:6325471 /UG=Hs.252574 ribosomal protein L10a /FL=gb:U12404.1 gb:NM_007104.2
200037_s_at	4773.3	P	0.000244	gb:NM_016587.1 /DEF=Homo sapiens heterochromatin-like protein 1 (HECH), mRNA. /FEA=mRNA /GEN=HECH /PROD=heterochromatin-like protein 1 /DB_XREF=gi:7705406 /UG=Hs.278554 heterochromatin-like protein 1 /FL=gb:AF136630.1 gb:NM_016587.1
200038_s_at	7574.2	P	0.000244	gb:NM_000985.1 /DEF=Homo sapiens ribosomal protein L17 (RPL17), mRNA. /FEA=mRNA /GEN=RPL17 /PROD=ribosomal protein L17 /DB_XREF=gi:4506616 /UG=Hs.82202 ribosomal protein L17 /FL=gb:BC000502.1 gb:NM_000985.1
200039_s_at	2622.6	P	0.000244	gb:NM_002794.1 /DEF=Homo sapiens proteasome (prosome, macropain) subunit, beta type, 2 (PSMB2), mRNA. /FEA=mRNA /GEN=PSMB2 /PROD=proteasome (prosome, macropain) subunit, betatype, 2 /DB_XREF=gi:4506194 /UG=Hs.1390 proteasome (prosome, macropain) subunit, beta type, 2 /FL=gb:BC000268.1 gb:NM_002794.1 gb:D26599.1
200040_at	2891.5	P	0.000244	gb:NM_006559.1 /DEF=Homo sapiens GAP-associated tyrosine phosphoprotein p62 (Sam68) (SAM68), mRNA. /FEA=mRNA /GEN=SAM68 /PROD=GAP-associated tyrosine phosphoprotein p62(Sam68) /DB_XREF=gi:5730026 /UG=Hs.119537 GAP-associated tyrosine phosphoprotein p62 (Sam68) /FL=gb:BC000717.1 gb:M88108.1 gb:NM_006559.1
200041_s_at	600.1	P	0.000244	gb:NM_004640.1 /DEF=Homo sapiens HLA-B associated transcript-1 (D6S81E), mRNA. /FEA=mRNA /GEN=D6S81E /PROD=HLA-B associated transcript-1 /DB_XREF=gi:4758111 /UG=Hs.55296 HLA-B associated transcript-1 /FL=gb:BC004350.1 gb:NM_004640.1
200042_at	918.6	P	0.000244	gb:NM_014306.1 /DEF=Homo sapiens hypothetical protein (HSPC117), mRNA. /FEA=mRNA /GEN=HSPC117 /PROD=similar to C. elegens hypothetical 55.2 kDprotein F16A11.2 /DB_XREF=gi:7657014 /UG=Hs.10729 hypothetical protein /FL=gb:BC000151.1 gb:BC002970.1 gb:AF161466.1 gb:NM_014306.1 gb:AF155658.1
200043_at	7945.6	P	0.000244	gb:NM_004450.1 /DEF=Homo sapiens enhancer of rudimentary (Drosophila) homolog (ERH), mRNA. /FEA=mRNA /GEN=ERH /PROD=enhancer of rudimentary (Drosophila) homolog /DB_XREF=gi:4758301 /UG=Hs.118757 enhancer of rudimentary (Drosophila) homolog /FL=gb:D85758.1 gb:U66871.1 gb:NM_004450.1
200044_at	4334.2	P	0.000244	gb:NM_003769.1 /DEF=Homo sapiens splicing factor, arginineserine-rich 9 (SFRS9), mRNA. /FEA=mRNA /GEN=SFRS9 /PROD=splicing factor, arginineserine-rich 9 /DB_XREF=gi:4506902 /UG=Hs.77608 splicing factor, arginineserine-rich 9 /FL=gb:U30825.1 gb:NM_003769.1
200045_at	717.0	P	0.000244	gb:NM_001090.1 /DEF=Homo sapiens ATP-binding cassette, sub-family F (GCN20), member 1 (ABCF1), mRNA. /FEA=mRNA /GEN=ABCF1 /PROD=ATP-binding cassette, sub-family F, member 1 /DB_XREF=gi:10947134 /UG=Hs.9573 ATP-binding cassette, sub-family F (GCN20), member 1 /FL=gb:NM_001090.1 gb:AF027302.1
200046_at	2550.9	P	0.000244	gb:NM_001344.1 /DEF=Homo sapiens defender against cell death 1 (DAD1), mRNA. /FEA=mRNA /GEN=DAD1 /PROD=defender against cell death 1 /DB_XREF=gi:4503252 /UG=Hs.82890 defender against cell death 1 /FL=gb:NM_001344.1 gb:D15057.1
200047_s_at	4608.4	P	0.000244	gb:NM_003403.2 /DEF=Homo sapiens YY1 transcription factor (YY1), mRNA. /FEA=mRNA /GEN=YY1 /PROD=YY1 transcription factor /DB_XREF=gi:6042207 /UG=Hs.97496 YY1 transcription factor /FL=gb:M77698.1 gb:M76541.1 gb:NM_003403.2
200048_s_at	5224.9	P	0.000244	gb:NM_006694.1 /DEF=Homo sapiens jumping translocation breakpoint (JTB), mRNA. /FEA=mRNA /GEN=JTB /PROD=jumping translocation breakpoint /DB_XREF=gi:5729888 /UG=Hs.6396 jumping translocation breakpoint /FL=gb:BC000499.1 gb:BC001363.1 gb:BC000996.2 gb:BC001667.1 gb:AB016488.1 gb:AF131797.1 gb:NM_006694.1 gb:AF115850.2
200049_at	392.5	P	0.000244	gb:NM_007067.1 /DEF=Homo sapiens histone acetyltransferase (HBOA), mRNA. /FEA=mRNA /GEN=HBOA /PROD=histone acetyltransferase /DB_XREF=gi:5901961 /UG=Hs.21907 histone acetyltransferase /FL=gb:AF074606.1 gb:AF140360.1 gb:NM_007067.1
200050_at	2036.5	P	0.000732	gb:NM_007145.1 /DEF=Homo sapiens zinc finger protein 146 (ZNF146), mRNA. /FEA=mRNA /GEN=ZNF146 /PROD=zinc finger protein 146 /DB_XREF=gi:6005965 /UG=Hs.301819 zinc finger protein 146 /FL=gb:BC005154.1 gb:NM_007145.1
200051_at	460.5	P	0.000244	gb:NM_005146.1 /DEF=Homo sapiens squamous cell carcinoma antigen recognised by T cells (SART1), mRNA. /FEA=mRNA /GEN=SART1 /PROD=squamous cell carcinoma antigen recognised by Tcells /DB_XREF=gi:10863888 /UG=Hs.288319 squamous cell carcinoma antigen recognised by T cells /FL=gb:NM_005146.1 gb:BC001058.1 gb:AB006198.1
200052_s_at	2115.7	P	0.000244	gb:NM_004515.1 /DEF=Homo sapiens interleukin enhancer binding factor 2, 45kD (ILF2), mRNA. /FEA=mRNA /GEN=ILF2 /PROD=interleukin enhancer binding factor 2, 45kD /DB_XREF=gi:4758601 /UG=Hs.75117 interleukin enhancer binding factor 2, 45kD /FL=gb:BC000382.1 gb:NM_004515.1 gb:U10323.1
200053_at	753.1	P	0.000244	gb:NM_004890.1 /DEF=Homo sapiens sperm associated antigen 7 (SPAG7), mRNA. /FEA=mRNA /GEN=SPAG7 /PROD=sperm associated antigen 7 /DB_XREF=gi:4757715 /UG=Hs.90436 sperm associated antigen 7 /FL=gb:AF047437.1 gb:NM_004890.1
200054_at	230.7	P	0.000732	gb:NM_003904.1 /DEF=Homo sapiens zinc finger protein 259 (ZNF259), mRNA. /FEA=mRNA /GEN=ZNF259 /PROD=zinc finger protein 259 /DB_XREF=gi:4508020 /UG=Hs.7165 zinc finger protein 259 /FL=gb:BC004256.1 gb:AF019767.1 gb:NM_003904.1
200055_at	846.0	P	0.000244	gb:NM_006284.1 /DEF=Homo sapiens TATA box binding protein (TBP)-associated factor, RNA polymerase II, H, 30kD (TAF2H), mRNA. /FEA=mRNA /GEN=TAF2H /PROD=TATA box binding protein (TBP)-associatedfactor, RNA polymerase II, H, 30kD /DB_XREF=gi:5454105 /UG=Hs.89657 TATA box binding protein (TBP)-associated factor, RNA polymerase II, H, 30kD /FL=gb:NM_006284.1 gb:U13991.1
200056_s_at	459.5	P	0.000244	gb:NM_006333.1 /DEF=Homo sapiens nuclear DNA-binding protein (C1D), mRNA. /FEA=mRNA /GEN=C1D /PROD=nuclear DNA-binding protein /DB_XREF=gi:5453582 /UG=Hs.15164 nuclear DNA-binding protein /FL=gb:NM_006333.1
200057_s_at	3341.8	P	0.000244	gb:NM_007363.2 /DEF=Homo sapiens non-POU-domain-containing, octamer-binding (NONO), mRNA. /FEA=mRNA /GEN=NONO /PROD=non-Pou domain-containing octamer (ATGCAAAT)binding protein /DB_XREF=gi:7657382 /UG=Hs.172207 non-POU-domain-containing, octamer-binding /FL=gb:NM_007363.2
200058_s_at	2758.1	P	0.000244	gb:BC001417.1 /DEF=Homo sapiens, Similar to U5 snRNP-specific protein, 200 kDa (DEXH RNA helicase family), clone MGC:2580, mRNA, complete cds. /FEA=mRNA /PROD=Similar to U5 snRNP-specific protein, 200 kDa(DEXH RNA helicase family) /DB_XREF=gi:12655128 /UG=Hs.246112 KIAA0788 protein /FL=gb:BC001417.1 gb:AF119874.1
200059_s_at	4801.2	P	0.000244	gb:BC001360.1 /DEF=Homo sapiens, ras homolog gene family, member A, clone MGC:2330, mRNA, complete cds. /FEA=mRNA /PROD=ras homolog gene family, member A /DB_XREF=gi:12655024 /UG=Hs.77273 ras homolog gene family, member A /FL=gb:NM_001664.1 gb:BC001360.1 gb:L25080.1
200060_s_at	2101.5	P	0.000244	gb:BC001659.1 /DEF=Homo sapiens, RNA-binding protein S1, serine-rich domain, clone MGC:1125, mRNA, complete cds. /FEA=mRNA /PROD=RNA-binding protein S1, serine-rich domain /DB_XREF=gi:12804496 /UG=Hs.75104 RNA-binding protein S1, serine-rich domain /FL=gb:BC001659.1 gb:BC001838.1
200061_s_at	10341.5	P	0.000244	gb:BC000523.1 /DEF=Homo sapiens, Similar to ribosomal protein S24, clone MGC:8595, mRNA, complete cds. /FEA=mRNA /PROD=Similar to ribosomal protein S24 /DB_XREF=gi:12653502 /UG=Hs.180450 ribosomal protein S24 /FL=gb:BC000523.1 gb:BC003149.1
200062_s_at	16292.7	P	0.000244	gb:L05095.1 /DEF=Homo sapiens ribosomal protein L30 mRNA, complete cds. /FEA=mRNA /PROD=ribosomal protein L30 /DB_XREF=gi:388034 /UG=Hs.111222 ribosomal protein L30 /FL=gb:L05095.1 gb:NM_000989.1
200063_s_at	11058.8	P	0.000244	gb:BC002398.1 /DEF=Homo sapiens, nucleophosmin (nucleolar phosphoprotein B23, numatrin), clone MGC:8463, mRNA, complete cds. /FEA=mRNA /PROD=nucleophosmin (nucleolar phosphoprotein B23,numatrin) /DB_XREF=gi:12803184 /UG=Hs.9614 nucleophosmin (nucleolar phosphoprotein B23, numatrin) /FL=gb:NM_002520.1 gb:BC002398.1 gb:BC003670.1 gb:M23613.1 gb:M26697.1 gb:M28699.1
200064_at	4447.1	P	0.000244	gb:AF275719.1 /DEF=Homo sapiens isolate Liv chaperone protein HSP90 beta (HSP90BETA) mRNA, complete cds. /FEA=mRNA /GEN=HSP90BETA /PROD=chaperone protein HSP90 beta /DB_XREF=gi:9082288 /UG=Hs.74335 heat shock 90kD protein 1, beta /FL=gb:BC004928.1 gb:M16660.1 gb:NM_007355.1 gb:AF275719.1
200065_s_at	3128.5	P	0.000244	gb:AF052179.1 /DEF=Homo sapiens clone 24537 ADP-ribosylation factor 1 mRNA, complete cds. /FEA=mRNA /PROD=ADP-ribosylation factor 1 /DB_XREF=gi:3360490 /UG=Hs.74571 ADP-ribosylation factor 1 /FL=gb:M84326.1 gb:M36340.1 gb:AF055002.1 gb:AF052179.1 gb:NM_001658.2
200066_at	990.7	P	0.000244	gb:AF182645.1 /DEF=Homo sapiens chondrosarcoma-associated protein 2 (CSA2) mRNA, complete cds. /FEA=mRNA /GEN=CSA2 /PROD=chondrosarcoma-associated protein 2 /DB_XREF=gi:5901877 /UG=Hs.8024 IK cytokine, down-regulator of HLA II /FL=gb:NM_006083.2 gb:AF182645.1
200067_x_at	2175.6	P	0.000244	Consensus includes gb:AL078596 /DEF=Human DNA sequence from clone RP3-429G5 on chromosome 6q21-22.1. Contains the NR2E1 gene for nuclear receptor 2E1 (tailless, TLL, TLX, XTLL), the 3 end of the SNX3 gene for sorting nexin 3, ESTs, STSs, GSSs and four predicted CpG islands /FEA=mRNA_2 /DB_XREF=gi:6010168 /UG=Hs.12102 sorting nexin 3 /FL=gb:AF062483.1 gb:AF034546.1 gb:NM_003795.1
200068_s_at	4883.5	P	0.000244	gb:M94859.1 /DEF=Human calnexin mRNA, complete cds. /FEA=mRNA /PROD=calnexin /DB_XREF=gi:179831 /UG=Hs.155560 calnexin /FL=gb:NM_001746.1 gb:BC003552.1 gb:M94859.1 gb:M98452.1 gb:L10284.1 gb:L18887.1
200069_at	221.2	P	0.000244	Consensus includes gb:AI656011 /FEA=EST /DB_XREF=gi:4739990 /DB_XREF=est:tt42e08.x1 /CLONE=IMAGE:2243462 /UG=Hs.116875 KIAA0156 gene product /FL=gb:AB020880.1 gb:NM_014706.1 gb:D63879.1
200070_at	362.2	P	0.000732	gb:BC001393.1 /DEF=Homo sapiens, hypothetical protein, clone MGC:782, mRNA, complete cds. /FEA=mRNA /PROD=hypothetical protein /DB_XREF=gi:12655084 /UG=Hs.4973 hypothetical protein /FL=gb:BC001393.1
200071_at	979.0	P	0.000244	Consensus includes gb:BF224259 /FEA=EST /DB_XREF=gi:11131523 /DB_XREF=est:7q85c09.x1 /CLONE=IMAGE:3705208 /UG=Hs.79968 splicing factor 30, survival of motor neuron-related /FL=gb:AF083385.1 gb:AF107463.1 gb:NM_005871.1
200072_s_at	2112.0	P	0.000244	gb:AF061832.1 /DEF=Homo sapiens M4 protein deletion mutant mRNA, complete cds. /FEA=mRNA /PROD=M4 protein deletion mutant /DB_XREF=gi:3126877 /UG=Hs.79024 heterogeneous nuclear ribonucleoprotein M /FL=gb:AF061832.1
200073_s_at	3809.8	P	0.000244	gb:M94630.1 /DEF=Homo sapiens hnRNP-C like protein mRNA, complete cds. /FEA=mRNA /PROD=DNA-binding protein /DB_XREF=gi:181913 /UG=Hs.303627 heterogeneous nuclear ribonucleoprotein D (AU-rich element RNA-binding protein 1, 37kD) /FL=gb:M94630.1
200074_s_at	5919.1	P	0.000244	gb:U16738.1 /DEF=Homo sapiens CAG-isl 7 mRNA, complete cds. /FEA=mRNA /PROD=CAG-isl 7 /DB_XREF=gi:608516 /UG=Hs.738 ribosomal protein L14 /FL=gb:U16738.1
200075_s_at	1060.4	P	0.000244	gb:BC006249.1 /DEF=Homo sapiens, guanylate kinase 1, clone MGC:10618, mRNA, complete cds. /FEA=mRNA /PROD=guanylate kinase 1 /DB_XREF=gi:13623296 /FL=gb:BC006249.1
200076_s_at	386.9	P	0.000732	gb:BC006479.1 /DEF=Homo sapiens, hypothetical protein MGC2749, clone MGC:4376, mRNA, complete cds. /FEA=mRNA /PROD=hypothetical protein MGC2749 /DB_XREF=gi:13623702 /FL=gb:BC006479.1
200077_s_at	7167.4	P	0.000244	gb:D87914.1 /DEF=Human mRNA for ornithine decarboxylase antizyme, complete cds. /FEA=mRNA /GEN=hAZ-brain /PROD=ornithine decarboxylase antizyme /DB_XREF=gi:1590807 /FL=gb:D87914.1
200078_s_at	1602.1	P	0.000244	gb:BC005876.1 /DEF=Homo sapiens, ATPase, H+ transporting, lysosomal (vacuolar proton pump) 21kD, clone MGC:4498, mRNA, complete cds. /FEA=mRNA /PROD=ATPase, H+ transporting, lysosomal (vacuolarproton pump) 21kD /DB_XREF=gi:13543437 /FL=gb:BC005876.1
200079_s_at	1775.2	P	0.000244	gb:AF285758.1 /DEF=Homo sapiens lysyl-tRNA synthetase mRNA, complete cds; nuclear gene for mitochondrial product; alternatively spliced. /FEA=CDS /PROD=lysyl-tRNA synthetase /DB_XREF=gi:11095908 /UG=Hs.3100 lysyl-tRNA synthetase /FL=gb:AF285758.1
200080_s_at	11883.2	P	0.000244	Consensus includes gb:AI955655 /FEA=EST /DB_XREF=gi:5747965 /DB_XREF=est:wt36f03.x1 /CLONE=IMAGE:2509565 /UG=Hs.181307 H3 histone, family 3A
200081_s_at	9993.1	P	0.000244	Consensus includes gb:BE741754 /FEA=EST /DB_XREF=gi:10155746 /DB_XREF=est:601595220F1 /CLONE=IMAGE:3949109 /UG=Hs.241507 ribosomal protein S6
200082_s_at	10628.5	P	0.000244	Consensus includes gb:AI805587 /FEA=EST /DB_XREF=gi:5392153 /DB_XREF=est:tx97a02.x1 /CLONE=IMAGE:2277482 /UG=Hs.301547 ribosomal protein S7
200083_at	1999.1	P	0.000244	Consensus includes gb:AA621731 /FEA=EST /DB_XREF=gi:2525670 /DB_XREF=est:af54h05.s1 /CLONE=IMAGE:1035513 /UG=Hs.12064 ubiquitin specific protease 22
200084_at	1629.2	P	0.000244	Consensus includes gb:BE748698 /FEA=EST /DB_XREF=gi:10162690 /DB_XREF=est:601571740T1 /CLONE=IMAGE:3838712 /UG=Hs.78050 small acidic protein
200085_s_at	4145.1	P	0.000244	Consensus includes gb:NM_007108.1 /DEF=Homo sapiens transcription elongation factor B (SIII), polypeptide 2 (18kD, elongin B) (TCEB2), mRNA. /FEA=CDS /GEN=TCEB2 /PROD=elongin B /DB_XREF=gi:6005889 /UG=Hs.172772 transcription elongation factor B (SIII), polypeptide 2 (18kD, elongin B) /FL=gb:NM_007108.1 gb:L42856.1
200086_s_at	5044.7	P	0.000244	Consensus includes gb:AA854966 /FEA=EST /DB_XREF=gi:2942504 /DB_XREF=est:aj70d12.s1 /CLONE=IMAGE:1401815 /UG=Hs.113205 cytochrome c oxidase subunit IV
200087_s_at	3813.9	P	0.000244	Consensus includes gb:AK024976.1 /DEF=Homo sapiens cDNA: FLJ21323 fis, clone COL02374. /FEA=mRNA /DB_XREF=gi:10437405 /UG=Hs.75914 Homo sapiens cDNA: FLJ21323 fis, clone COL02374
200088_x_at	13224.6	P	0.000244	Consensus includes gb:AK026491.1 /DEF=Homo sapiens cDNA: FLJ22838 fis, clone KAIA4494, highly similar to HUML12A Human ribosomal protein L12 mRNA. /FEA=mRNA /DB_XREF=gi:10439364 /UG=Hs.182979 ribosomal protein L12
200089_s_at	8277.7	P	0.000244	Consensus includes gb:AI953886 /FEA=EST /DB_XREF=gi:5746196 /DB_XREF=est:wx70g02.x1 /CLONE=IMAGE:2549042 /UG=Hs.286 ribosomal protein L4
200090_at	1117.1	P	0.000244	Consensus includes gb:BG168896 /FEA=EST /DB_XREF=gi:12675599 /DB_XREF=est:602320235F1 /CLONE=IMAGE:4415240 /UG=Hs.138381 farnesyltransferase, CAAX box, alpha
200091_s_at	8908.4	P	0.000244	Consensus includes gb:AA888388 /FEA=EST /DB_XREF=gi:3004063 /DB_XREF=est:nw79f03.s1 /CLONE=IMAGE:1252829 /UG=Hs.113029 ribosomal protein S25
200092_s_at	12769.6	P	0.000244	Consensus includes gb:BF216701 /FEA=EST /DB_XREF=gi:11110287 /DB_XREF=est:601884615F1 /CLONE=IMAGE:4103235 /UG=Hs.179779 ribosomal protein L37
200093_s_at	3204.1	P	0.000244	Consensus includes gb:N32864 /FEA=EST /DB_XREF=gi:1153263 /DB_XREF=est:yw88d08.s1 /CLONE=IMAGE:259311 /UG=Hs.256697 histidine triad nucleotide-binding protein
200094_s_at	5961.6	P	0.000244	Consensus includes gb:AI004246 /FEA=EST /DB_XREF=gi:3213756 /DB_XREF=est:ou03g06.x1 /CLONE=IMAGE:1625242 /UG=Hs.75309 eukaryotic translation elongation factor 2
200095_x_at	15663.1	P	0.000244	Consensus includes gb:AA320764 /FEA=EST /DB_XREF=gi:1973113 /DB_XREF=est:EST23183 /UG=Hs.76230 ribosomal protein S10
200096_s_at	5693.7	P	0.000244	Consensus includes gb:AI862255 /FEA=EST /DB_XREF=gi:5526362 /DB_XREF=est:tb77d10.x1 /CLONE=IMAGE:2060371 /UG=Hs.24322 ATPase, H+ transporting, lysosomal (vacuolar proton pump) 9kD
200097_s_at	2964.2	P	0.000244	Consensus includes gb:AI701949 /FEA=EST /DB_XREF=gi:4989849 /DB_XREF=est:tq09c07.x1 /CLONE=IMAGE:2208300 /UG=Hs.129548 heterogeneous nuclear ribonucleoprotein K
200098_s_at	2013.6	P	0.000244	Consensus includes gb:T33068 /FEA=EST /DB_XREF=gi:615166 /DB_XREF=est:EST56576 /UG=Hs.7101 anaphase-promoting complex subunit 5
200099_s_at	11483.4	P	0.000244	Consensus includes gb:AL356115 /DEF=Human DNA sequence from clone RP11-486O22 on chromosome 10 Contains the 3part of a gene for KIAA1128 protein, a novel pseudogene, a gene for protein similar to RPS3A (ribosomal protein S3A), ESTs, STSs, GSSs and CpG islands /FEA=CDS_1 /DB_XREF=gi:9795038 /UG=Hs.307132 Human DNA sequence from clone RP11-486O22 on chromosome 10 Contains the 3part of a gene for KI…
200593_s_at	1302.5	P	0.000244	gb:BC003621.1 /DEF=Homo sapiens, heterogeneous nuclear ribonucleoprotein U (scaffold attachment factor A), clone MGC:1992, mRNA, complete cds. /FEA=mRNA /PROD=heterogeneous nuclear ribonucleoprotein U(scaffold attachment factor A) /DB_XREF=gi:13177672 /UG=Hs.103804 heterogeneous nuclear ribonucleoprotein U (scaffold attachment factor A) /FL=gb:BC003367.1 gb:BC003621.1 gb:NM_004501.1
200594_x_at	3672.3	P	0.000244	gb:NM_004501.1 /DEF=Homo sapiens heterogeneous nuclear ribonucleoprotein U (scaffold attachment factor A) (HNRPU), mRNA. /FEA=mRNA /GEN=HNRPU /PROD=heterogeneous nuclear ribonucleoprotein U(scaffold attachment factor A) /DB_XREF=gi:4758545 /UG=Hs.103804 heterogeneous nuclear ribonucleoprotein U (scaffold attachment factor A) /FL=gb:BC003367.1 gb:BC003621.1 gb:NM_004501.1
200595_s_at	1756.5	P	0.000244	gb:NM_003750.1 /DEF=Homo sapiens eukaryotic translation initiation factor 3, subunit 10 (theta, 150170kD) (EIF3S10), mRNA. /FEA=mRNA /GEN=EIF3S10 /PROD=eukaryotic translation initiation factor 3,subunit 10 (theta, 150170kD) /DB_XREF=gi:4503508 /UG=Hs.198899 eukaryotic translation initiation factor 3, subunit 10 (theta, 150170kD) /FL=gb:D50929.1 gb:U58046.1 gb:U78311.1 gb:NM_003750.1
200596_s_at	854.2	P	0.000244	Consensus includes gb:BE614908 /FEA=EST /DB_XREF=gi:9896507 /DB_XREF=est:601280348F1 /CLONE=IMAGE:3622499 /UG=Hs.198899 eukaryotic translation initiation factor 3, subunit 10 (theta, 150170kD) /FL=gb:D50929.1 gb:U58046.1 gb:U78311.1 gb:NM_003750.1
200597_at	272.6	P	0.000244	Consensus includes gb:AI123320 /FEA=EST /DB_XREF=gi:3539086 /DB_XREF=est:qa48a10.x1 /CLONE=IMAGE:1689978 /UG=Hs.198899 eukaryotic translation initiation factor 3, subunit 10 (theta, 150170kD) /FL=gb:D50929.1 gb:U58046.1 gb:U78311.1 gb:NM_003750.1
200598_s_at	2964.6	P	0.000244	Consensus includes gb:AI582238 /FEA=EST /DB_XREF=gi:4568135 /DB_XREF=est:tq65c10.x1 /CLONE=IMAGE:2213682 /UG=Hs.82689 tumor rejection antigen (gp96) 1 /FL=gb:NM_003299.1
200599_s_at	2542.2	P	0.000244	gb:NM_003299.1 /DEF=Homo sapiens tumor rejection antigen (gp96) 1 (TRA1), mRNA. /FEA=mRNA /GEN=TRA1 /PROD=tumor rejection antigen (gp96) 1 /DB_XREF=gi:4507676 /UG=Hs.82689 tumor rejection antigen (gp96) 1 /FL=gb:NM_003299.1
200600_at	1.0	A	0.976074	gb:NM_002444.1 /DEF=Homo sapiens moesin (MSN), mRNA. /FEA=mRNA /GEN=MSN /PROD=moesin /DB_XREF=gi:4505256 /UG=Hs.170328 moesin /FL=gb:M69066.1 gb:NM_002444.1
200601_at	281.1	P	0.000732	gb:U48734.1 /DEF=Human non-muscle alpha-actinin mRNA, complete cds. /FEA=mRNA /PROD=alpha actinin /DB_XREF=gi:3157975 /UG=Hs.182485 actinin, alpha 4 /FL=gb:NM_004924.2 gb:BC005033.1 gb:D89980.1 gb:U48734.1
200602_at	1141.8	P	0.000244	gb:NM_000484.1 /DEF=Homo sapiens amyloid beta (A4) precursor protein (protease nexin-II, Alzheimer disease) (APP), mRNA. /FEA=mRNA /GEN=APP /PROD=amyloid beta (A4) precursor protein (proteasenexin-II, Alzheimer disease) /DB_XREF=gi:4502166 /UG=Hs.177486 amyloid beta (A4) precursor protein (protease nexin-II, Alzheimer disease) /FL=gb:NM_000484.1
200603_at	6808.5	P	0.000244	Consensus includes gb:AL050038.1 /DEF=Homo sapiens mRNA; cDNA DKFZp566J0124 (from clone DKFZp566J0124). /FEA=mRNA /DB_XREF=gi:4884279 /UG=Hs.183037 protein kinase, cAMP-dependent, regulatory, type I, alpha (tissue specific extinguisher 1) /FL=gb:M18468.1 gb:M33336.1 gb:NM_002734.1
200604_s_at	1425.1	P	0.000244	gb:M18468.1 /DEF=Human cAMP-dependent protein kinase regulatory subunit type I (PRKAR1A) mRNA, complete cds. /FEA=mRNA /GEN=PRKAR1A /PROD=cAMP-dependent protein kinase regulatory subunittype 1 /DB_XREF=gi:1526988 /UG=Hs.183037 protein kinase, cAMP-dependent, regulatory, type I, alpha (tissue specific extinguisher 1) /FL=gb:M18468.1 gb:M33336.1 gb:NM_002734.1
200605_s_at	4537.6	P	0.000244	gb:NM_002734.1 /DEF=Homo sapiens protein kinase, cAMP-dependent, regulatory, type I, alpha (tissue specific extinguisher 1) (PRKAR1A), mRNA. /FEA=mRNA /GEN=PRKAR1A /PROD=protein kinase, cAMP-dependent, regulatory, typeI, alpha /DB_XREF=gi:4506062 /UG=Hs.183037 protein kinase, cAMP-dependent, regulatory, type I, alpha (tissue specific extinguisher 1) /FL=gb:M18468.1 gb:M33336.1 gb:NM_002734.1
200606_at	2943.2	P	0.000244	gb:NM_004415.1 /DEF=Homo sapiens desmoplakin (DPI, DPII) (DSP), mRNA. /FEA=mRNA /GEN=DSP /PROD=desmoplakin (DPI, DPII) /DB_XREF=gi:4758199 /UG=Hs.74316 desmoplakin (DPI, DPII) /FL=gb:M77830.3 gb:NM_004415.1
200607_s_at	650.1	P	0.000244	Consensus includes gb:BG289967 /FEA=EST /DB_XREF=gi:13046289 /DB_XREF=est:602381386F1 /CLONE=IMAGE:4499085 /UG=Hs.81848 RAD21 (S. pombe) homolog /FL=gb:D38551.1 gb:NM_006265.1
200608_s_at	2370.6	P	0.000244	gb:NM_006265.1 /DEF=Homo sapiens RAD21 (S. pombe) homolog (RAD21), mRNA. /FEA=mRNA /GEN=RAD21 /PROD=RAD21 (S. pombe) homolog /DB_XREF=gi:5453993 /UG=Hs.81848 RAD21 (S. pombe) homolog /FL=gb:D38551.1 gb:NM_006265.1
200609_s_at	1967.0	P	0.000732	gb:NM_017491.1 /DEF=Homo sapiens WD repeat domain 1 (WDR1), transcript variant 1, mRNA. /FEA=mRNA /GEN=WDR1 /PROD=WD repeat-containing protein 1, isoform 1 /DB_XREF=gi:9257256 /UG=Hs.85100 WD repeat domain 1 /FL=gb:BC000201.1 gb:BC002489.1 gb:AF020056.1 gb:AB010427.2 gb:NM_017491.1
200610_s_at	2412.6	P	0.000244	gb:NM_005381.1 /DEF=Homo sapiens nucleolin (NCL), mRNA. /FEA=mRNA /GEN=NCL /PROD=nucleolin /DB_XREF=gi:4885510 /UG=Hs.79110 nucleolin /FL=gb:NM_005381.1
200611_s_at	1088.5	P	0.000244	gb:AB010427.2 /DEF=Homo sapiens mRNA for NORI-1, complete cds. /FEA=mRNA /PROD=NORI-1 /DB_XREF=gi:5103672 /UG=Hs.85100 WD repeat domain 1 /FL=gb:BC000201.1 gb:BC002489.1 gb:AF020056.1 gb:AB010427.2 gb:NM_017491.1
200612_s_at	237.4	P	0.000244	gb:NM_001282.1 /DEF=Homo sapiens adaptor-related protein complex 2, beta 1 subunit (AP2B1), mRNA. /FEA=mRNA /GEN=AP2B1 /PROD=adaptor-related protein complex 2, beta 1subunit /DB_XREF=gi:4557468 /UG=Hs.74626 adaptor-related protein complex 2, beta 1 subunit /FL=gb:M34175.1 gb:NM_001282.1
200613_at	681.6	P	0.000244	gb:NM_004068.1 /DEF=Homo sapiens adaptor-related protein complex 2, mu 1 subunit (AP2M1), mRNA. /FEA=mRNA /GEN=AP2M1 /PROD=adaptor-related protein complex 2, mu 1 subunit /DB_XREF=gi:4757993 /UG=Hs.152936 adaptor-related protein complex 2, mu 1 subunit /FL=gb:U36188.1 gb:BC004996.1 gb:D63475.1 gb:NM_004068.1
200614_at	11971.3	P	0.000244	gb:NM_004859.1 /DEF=Homo sapiens clathrin, heavy polypeptide (Hc) (CLTC), mRNA. /FEA=mRNA /GEN=CLTC /PROD=clathrin heavy chain /DB_XREF=gi:4758011 /UG=Hs.178710 clathrin, heavy polypeptide (Hc) /FL=gb:D21260.1 gb:NM_004859.1
200615_s_at	198.6	P	0.001221	Consensus includes gb:AL567295 /FEA=EST /DB_XREF=gi:12920509 /DB_XREF=est:AL567295 /CLONE=CS0DF027YO06 (3 prime) /UG=Hs.74626 adaptor-related protein complex 2, beta 1 subunit /FL=gb:M34175.1 gb:NM_001282.1
200616_s_at	2157.2	P	0.000732	gb:BC000371.1 /DEF=Homo sapiens, KIAA0152 gene product, clone MGC:8341, mRNA, complete cds. /FEA=mRNA /PROD=KIAA0152 gene product /DB_XREF=gi:12653206 /UG=Hs.181418 KIAA0152 gene product /FL=gb:BC000371.1 gb:D63486.1 gb:NM_014730.1
200617_at	225.1	P	0.000244	gb:NM_014730.1 /DEF=Homo sapiens KIAA0152 gene product (KIAA0152), mRNA. /FEA=mRNA /GEN=KIAA0152 /PROD=KIAA0152 gene product /DB_XREF=gi:7661947 /UG=Hs.181418 KIAA0152 gene product /FL=gb:BC000371.1 gb:D63486.1 gb:NM_014730.1
200618_at	1162.8	P	0.000244	gb:NM_006148.1 /DEF=Homo sapiens LIM and SH3 protein 1 (LASP1), mRNA. /FEA=mRNA /GEN=LASP1 /PROD=LIM and SH3 protein 1 /DB_XREF=gi:5453709 /UG=Hs.75080 LIM and SH3 protein 1 /FL=gb:NM_006148.1
200619_at	1148.9	P	0.005859	gb:NM_006842.1 /DEF=Homo sapiens splicing factor 3b, subunit 2, 145kD (SF3B2), mRNA. /FEA=mRNA /GEN=SF3B2 /PROD=splicing factor 3b, subunit 2, 145kD /DB_XREF=gi:5803154 /UG=Hs.75916 splicing factor 3b, subunit 2, 145kD /FL=gb:U41371.1 gb:NM_006842.1
200620_at	2870.2	P	0.000244	gb:NM_004872.1 /DEF=Homo sapiens chromosome 1 open reading frame 8 (C1ORF8), mRNA. /FEA=mRNA /GEN=C1ORF8 /PROD=chromosome 1 open reading frame 8 /DB_XREF=gi:4758571 /UG=Hs.11441 chromosome 1 open reading frame 8 /FL=gb:BC003106.1 gb:AF290615.1 gb:AF047439.1 gb:NM_004872.1
200621_at	1185.9	P	0.000244	gb:NM_004078.1 /DEF=Homo sapiens cysteine and glycine-rich protein 1 (CSRP1), mRNA. /FEA=mRNA /GEN=CSRP1 /PROD=cysteine and glycine-rich protein 1 /DB_XREF=gi:4758085 /UG=Hs.108080 cysteine and glycine-rich protein 1 /FL=gb:M33146.1 gb:NM_004078.1
200622_x_at	494.3	P	0.001221	Consensus includes gb:AV685208 /FEA=EST /DB_XREF=gi:10287071 /DB_XREF=est:AV685208 /CLONE=GKCCXA06 /UG=Hs.141011 calmodulin 3 (phosphorylase kinase, delta) /FL=gb:BC005137.1 gb:J04046.1 gb:NM_005184.1
200623_s_at	288.5	P	0.001953	gb:NM_005184.1 /DEF=Homo sapiens calmodulin 3 (phosphorylase kinase, delta) (CALM3), mRNA. /FEA=mRNA /GEN=CALM3 /PROD=calmodulin 3 (phosphorylase kinase, delta) /DB_XREF=gi:4885108 /UG=Hs.141011 calmodulin 3 (phosphorylase kinase, delta) /FL=gb:BC005137.1 gb:J04046.1 gb:NM_005184.1
200624_s_at	1638.1	P	0.000244	Consensus includes gb:AA577695 /FEA=EST /DB_XREF=gi:2355879 /DB_XREF=est:nn22h02.s1 /CLONE=IMAGE:1084659 /UG=Hs.78825 matrin 3 /FL=gb:NM_018834.1 gb:AB018266.1
200625_s_at	1614.8	P	0.000244	gb:NM_006367.2 /DEF=Homo sapiens adenylyl cyclase-associated protein (CAP), mRNA. /FEA=mRNA /GEN=CAP /PROD=adenylyl cyclase-associated protein /DB_XREF=gi:10938021 /UG=Hs.104125 adenylyl cyclase-associated protein /FL=gb:NM_006367.2 gb:L12168.1 gb:M98474.1
200626_s_at	2864.1	P	0.000732	gb:NM_018834.1 /DEF=Homo sapiens matrin 3 (MATR3), mRNA. /FEA=mRNA /GEN=MATR3 /PROD=matrin 3 /DB_XREF=gi:10047081 /UG=Hs.78825 matrin 3 /FL=gb:NM_018834.1 gb:AB018266.1
200627_at	6342.3	P	0.000244	gb:BC003005.1 /DEF=Homo sapiens, unactive progesterone receptor, 23 kD, clone MGC:4004, mRNA, complete cds. /FEA=mRNA /PROD=unactive progesterone receptor, 23 kD /DB_XREF=gi:12804292 /UG=Hs.278270 unactive progesterone receptor, 23 kD /FL=gb:BC003005.1 gb:L24804.1 gb:NM_006601.1
200628_s_at	187.4	A	0.080566	gb:M61715.1 /DEF=Human tryptophanyl-tRNA synthetase (WRS) mRNA, complete cds. /FEA=mRNA /GEN=WARS /PROD=transfer RNA-Trp synthetase /DB_XREF=gi:340367 /UG=Hs.82030 tryptophanyl-tRNA synthetase /FL=gb:M77804.1 gb:M61715.1 gb:NM_004184.2
200629_at	819.7	P	0.000244	gb:NM_004184.2 /DEF=Homo sapiens tryptophanyl-tRNA synthetase (WARS), mRNA. /FEA=mRNA /GEN=WARS /PROD=tryptophanyl-tRNA synthetase /DB_XREF=gi:7710155 /UG=Hs.82030 tryptophanyl-tRNA synthetase /FL=gb:M77804.1 gb:M61715.1 gb:NM_004184.2
200630_x_at	6374.5	P	0.000244	Consensus includes gb:AV702810 /FEA=EST /DB_XREF=gi:10719140 /DB_XREF=est:AV702810 /CLONE=ADBDGH01 /UG=Hs.145279 SET translocation (myeloid leukemia-associated) /FL=gb:U51924.1 gb:M93651.1 gb:NM_003011.1
200631_s_at	4053.1	P	0.000244	gb:NM_003011.1 /DEF=Homo sapiens SET translocation (myeloid leukemia-associated) (SET), mRNA. /FEA=mRNA /GEN=SET /PROD=SET translocation (myeloid leukemia-associated) /DB_XREF=gi:4506890 /UG=Hs.145279 SET translocation (myeloid leukemia-associated) /FL=gb:U51924.1 gb:M93651.1 gb:NM_003011.1
200632_s_at	279.7	P	0.000732	gb:NM_006096.1 /DEF=Homo sapiens N-myc downstream regulated (NDRG1), mRNA. /FEA=mRNA /GEN=NDRG1 /PROD=N-myc downstream regulated /DB_XREF=gi:5174656 /UG=Hs.75789 N-myc downstream regulated /FL=gb:BC003175.1 gb:D87953.1 gb:AF004162.1 gb:NM_006096.1
200633_at	15652.0	P	0.000244	gb:NM_018955.1 /DEF=Homo sapiens ubiquitin B (UBB), mRNA. /FEA=mRNA /GEN=UBB /PROD=ubiquitin B /DB_XREF=gi:11024713 /UG=Hs.183842 ubiquitin B /FL=gb:NM_018955.1 gb:BC000379.1
200634_at	2564.3	P	0.000244	gb:NM_005022.1 /DEF=Homo sapiens profilin 1 (PFN1), mRNA. /FEA=mRNA /GEN=PFN1 /PROD=profilin 1 /DB_XREF=gi:4826897 /UG=Hs.75721 profilin 1 /FL=gb:BC002475.1 gb:J03191.1 gb:NM_005022.1
200635_s_at	849.5	P	0.000244	Consensus includes gb:AU145351 /FEA=EST /DB_XREF=gi:11006872 /DB_XREF=est:AU145351 /CLONE=HEMBA1004591 /UG=Hs.75216 protein tyrosine phosphatase, receptor type, F /FL=gb:NM_002840.1
200636_s_at	2391.1	P	0.000244	gb:NM_002840.1 /DEF=Homo sapiens protein tyrosine phosphatase, receptor type, F (PTPRF), mRNA. /FEA=mRNA /GEN=PTPRF /PROD=protein tyrosine phosphatase, receptor type, fpolypeptide /DB_XREF=gi:4506310 /UG=Hs.75216 protein tyrosine phosphatase, receptor type, F /FL=gb:NM_002840.1
200637_s_at	218.3	P	0.001953	Consensus includes gb:AI762627 /FEA=EST /DB_XREF=gi:5178294 /DB_XREF=est:wi56g01.x1 /CLONE=IMAGE:2394288 /UG=Hs.75216 protein tyrosine phosphatase, receptor type, F /FL=gb:NM_002840.1
200638_s_at	5152.9	P	0.000244	gb:BC003623.1 /DEF=Homo sapiens, tyrosine 3-monooxygenasetryptophan 5-monooxygenase activation protein, zeta polypeptide, clone MGC:2153, mRNA, complete cds. /FEA=mRNA /PROD=tyrosine 3-monooxygenasetryptophan5-monooxygenase activation protein, zeta polypeptide /DB_XREF=gi:13177678 /UG=Hs.75103 tyrosine 3-monooxygenasetryptophan 5-monooxygenase activation protein, zeta polypeptide /FL=gb:BC003623.…
200639_s_at	6693.7	P	0.000244	gb:NM_003406.1 /DEF=Homo sapiens tyrosine 3-monooxygenasetryptophan 5-monooxygenase activation protein, zeta polypeptide (YWHAZ), mRNA. /FEA=mRNA /GEN=YWHAZ /PROD=tyrosine 3-monooxygenasetryptophan5-monooxygenase activation protein, zeta polypeptide /DB_XREF=gi:4507952 /UG=Hs.75103 tyrosine 3-monooxygenasetryptophan 5-monooxygenase activation protein, zeta polypeptide /FL=gb:BC003623.1 gb:M86400.…
200640_at	4387.3	P	0.000244	gb:NM_003406.1 /DEF=Homo sapiens tyrosine 3-monooxygenasetryptophan 5-monooxygenase activation protein, zeta polypeptide (YWHAZ), mRNA. /FEA=mRNA /GEN=YWHAZ /PROD=tyrosine 3-monooxygenasetryptophan5-monooxygenase activation protein, zeta polypeptide /DB_XREF=gi:4507952 /UG=Hs.75103 tyrosine 3-monooxygenasetryptophan 5-monooxygenase activation protein, zeta polypeptide /FL=gb:BC003623.1 gb:M86400.…
200641_s_at	3229.4	P	0.000244	gb:U28964.1 /DEF=Homo sapiens 14-3-3 protein mRNA, complete cds. /FEA=mRNA /PROD=14-3-3 protein /DB_XREF=gi:899458 /UG=Hs.75103 tyrosine 3-monooxygenasetryptophan 5-monooxygenase activation protein, zeta polypeptide /FL=gb:BC003623.1 gb:M86400.1 gb:NM_003406.1 gb:U28964.1
200642_at	7296.8	P	0.000244	gb:NM_000454.1 /DEF=Homo sapiens superoxide dismutase 1, soluble (amyotrophic lateral sclerosis 1 (adult)) (SOD1), mRNA. /FEA=mRNA /GEN=SOD1 /PROD=superoxide dismutase 1, soluble (amyotrophiclateral sclerosis 1 (adult)) /DB_XREF=gi:4507148 /UG=Hs.75428 superoxide dismutase 1, soluble (amyotrophic lateral sclerosis 1 (adult)) /FL=gb:BC001034.1 gb:K00065.1 gb:NM_000454.1
200643_at	517.6	P	0.000732	gb:NM_005336.1 /DEF=Homo sapiens high density lipoprotein binding protein (vigilin) (HDLBP), mRNA. /FEA=mRNA /GEN=HDLBP /PROD=high density lipoprotein binding protein /DB_XREF=gi:4885408 /UG=Hs.177516 high density lipoprotein binding protein (vigilin) /FL=gb:BC001179.1 gb:M64098.1 gb:NM_005336.1
200644_at	2934.8	P	0.000244	gb:NM_023009.1 /DEF=Homo sapiens macrophage myristoylated alanine-rich C kinase substrate (MACMARCKS), mRNA. /FEA=mRNA /GEN=MACMARCKS /PROD=macrophage myristoylated alanine-rich C kinasesubstrate /DB_XREF=gi:13491173 /UG=Hs.75061 macrophage myristoylated alanine-rich C kinase substrate /FL=gb:NM_023009.1
200645_at	3339.1	P	0.000244	gb:NM_007278.1 /DEF=Homo sapiens GABA(A) receptor-associated protein (GABARAP), mRNA. /FEA=mRNA /GEN=GABARAP /PROD=GABA(A) receptor-associated protein /DB_XREF=gi:6005763 /UG=Hs.7719 GABA(A) receptor-associated protein /FL=gb:AB030711.1 gb:AF044671.1 gb:AF067171.1 gb:AF161586.1 gb:NM_007278.1 gb:AF183425.1
200646_s_at	43.0	P	0.014160	gb:NM_006184.1 /DEF=Homo sapiens nucleobindin 1 (NUCB1), mRNA. /FEA=mRNA /GEN=NUCB1 /PROD=nucleobindin 1 /DB_XREF=gi:5453817 /UG=Hs.172609 nucleobindin 1 /FL=gb:BC002356.1 gb:M96824.1 gb:NM_006184.1
200647_x_at	3714.4	P	0.000244	gb:NM_003752.2 /DEF=Homo sapiens eukaryotic translation initiation factor 3, subunit 8 (110kD) (EIF3S8), mRNA. /FEA=mRNA /GEN=EIF3S8 /PROD=eukaryotic translation initiation factor 3,subunit 8 (110kD) /DB_XREF=gi:5579457 /UG=Hs.4835 eukaryotic translation initiation factor 3, subunit 8 (110kD) /FL=gb:NM_003752.2
200648_s_at	117.9	P	0.005859	gb:NM_002065.1 /DEF=Homo sapiens glutamate-ammonia ligase (glutamine synthase) (GLUL), mRNA. /FEA=mRNA /GEN=GLUL /PROD=glutamate-ammonia ligase (glutamine synthase) /DB_XREF=gi:4504026 /UG=Hs.170171 glutamate-ammonia ligase (glutamine synthase) /FL=gb:NM_002065.1
200649_at	43.7	P	0.008057	gb:BC002356.1 /DEF=Homo sapiens, nucleobindin 1, clone MGC:8479, mRNA, complete cds. /FEA=mRNA /PROD=nucleobindin 1 /DB_XREF=gi:12803104 /UG=Hs.172609 nucleobindin 1 /FL=gb:BC002356.1 gb:M96824.1 gb:NM_006184.1
200650_s_at	5132.4	P	0.000244	gb:NM_005566.1 /DEF=Homo sapiens lactate dehydrogenase A (LDHA), mRNA. /FEA=mRNA /GEN=LDHA /PROD=LDHA /DB_XREF=gi:5031856 /UG=Hs.2795 lactate dehydrogenase A /FL=gb:BC001829.1 gb:NM_005566.1
200651_at	13942.8	P	0.000244	gb:NM_006098.1 /DEF=Homo sapiens guanine nucleotide binding protein (G protein), beta polypeptide 2-like 1 (GNB2L1), mRNA. /FEA=mRNA /GEN=GNB2L1 /PROD=guanine nucleotide binding protein (G protein),beta polypeptide 2-like 1 /DB_XREF=gi:5174446 /UG=Hs.5662 guanine nucleotide binding protein (G protein), beta polypeptide 2-like 1 /FL=gb:BC000214.1 gb:BC000366.1 gb:BC000672.1 gb:M24194.1 gb:NM_00609…
200652_at	3239.2	P	0.000244	gb:NM_003145.2 /DEF=Homo sapiens signal sequence receptor, beta (translocon-associated protein beta) (SSR2), mRNA. /FEA=mRNA /GEN=SSR2 /PROD=signal sequence receptor, beta precursor /DB_XREF=gi:6552341 /UG=Hs.74564 signal sequence receptor, beta (translocon-associated protein beta) /FL=gb:D37991.1 gb:BC000341.1 gb:NM_003145.2
200653_s_at	6869.1	P	0.000244	gb:M27319.1 /DEF=Human calmodulin mRNA, complete cds. /FEA=mRNA /PROD=calmodulin /DB_XREF=gi:179809 /UG=Hs.177656 calmodulin 1 (phosphorylase kinase, delta) /FL=gb:M27319.1 gb:NM_006888.1
200654_at	4891.6	P	0.002930	gb:J02783.1 /DEF=Human thyroid hormone binding protein (p55) mRNA, complete cds. /FEA=mRNA /GEN=P4HB /DB_XREF=gi:339646 /UG=Hs.75655 procollagen-proline, 2-oxoglutarate 4-dioxygenase (proline 4-hydroxylase), beta polypeptide (protein disulfide isomerase; thyroid hormone binding protein p55) /FL=gb:J02783.1 gb:NM_000918.1
200655_s_at	7886.8	P	0.000244	gb:NM_006888.1 /DEF=Homo sapiens calmodulin 1 (phosphorylase kinase, delta) (CALM1), mRNA. /FEA=mRNA /GEN=CALM1 /PROD=calmodulin 1 (phosphorylase kinase, delta) /DB_XREF=gi:5901911 /UG=Hs.177656 calmodulin 1 (phosphorylase kinase, delta) /FL=gb:M27319.1 gb:NM_006888.1
200656_s_at	881.7	P	0.000244	gb:NM_000918.1 /DEF=Homo sapiens procollagen-proline, 2-oxoglutarate 4-dioxygenase (proline 4-hydroxylase), beta polypeptide (protein disulfide isomerase; thyroid hormone binding protein p55) (P4HB), mRNA. /FEA=mRNA /GEN=P4HB /PROD=procollagen-proline, 2-oxoglutarate4-dioxygenase (proline 4-hydroxylase), beta polypeptide(protein disulfide isomerase; thyroid hormone bindingprotein p55) /DB_XREF=gi…
200657_at	7770.8	P	0.000244	gb:NM_001152.1 /DEF=Homo sapiens solute carrier family 25 (mitochondrial carrier; adenine nucleotide translocator), member 5 (SLC25A5), nuclear gene encoding mitochondrial protein, mRNA. /FEA=mRNA /GEN=SLC25A5 /PROD=solute carrier family 25 (mitochondrial carrier;adenine nucleotide translocator), member 5 /DB_XREF=gi:4502098 /UG=Hs.79172 solute carrier family 25 (mitochondrial carrier; adenine nu…
200658_s_at	2753.4	P	0.000244	Consensus includes gb:AL560017 /FEA=EST /DB_XREF=gi:12906073 /DB_XREF=est:AL560017 /CLONE=CS0DG004YD08 (5 prime) /UG=Hs.75323 prohibitin /FL=gb:NM_002634.2
200659_s_at	676.2	P	0.000244	gb:NM_002634.2 /DEF=Homo sapiens prohibitin (PHB), mRNA. /FEA=mRNA /GEN=PHB /PROD=prohibitin /DB_XREF=gi:6031190 /UG=Hs.75323 prohibitin /FL=gb:NM_002634.2
200660_at	5431.9	P	0.001221	gb:NM_005620.1 /DEF=Homo sapiens S100 calcium-binding protein A11 (calgizzarin) (S100A11), mRNA. /FEA=mRNA /GEN=S100A11 /PROD=S100 calcium-binding protein A11 /DB_XREF=gi:5032056 /UG=Hs.256290 S100 calcium-binding protein A11 (calgizzarin) /FL=gb:D49355.1 gb:BC001410.1 gb:D50374.1 gb:NM_005620.1 gb:D38583.1
200661_at	1264.9	P	0.000732	gb:NM_000308.1 /DEF=Homo sapiens protective protein for beta-galactosidase (galactosialidosis) (PPGB), mRNA. /FEA=mRNA /GEN=PPGB /PROD=protective protein for beta-galactosidase /DB_XREF=gi:4505988 /UG=Hs.118126 protective protein for beta-galactosidase (galactosialidosis) /FL=gb:BC000597.1 gb:M22960.1 gb:NM_000308.1
200662_s_at	3204.5	P	0.000244	gb:NM_014765.1 /DEF=Homo sapiens translocase of outer mitochondrial membrane 20 (yeast) homolog (KIAA0016), mRNA. /FEA=mRNA /GEN=KIAA0016 /PROD=translocase of outer mitochondrial membrane 20(yeast) homolog /DB_XREF=gi:7657256 /UG=Hs.75187 translocase of outer mitochondrial membrane 20 (yeast) homolog /FL=gb:BC000882.1 gb:D13641.1 gb:NM_014765.1
200663_at	6764.5	P	0.000244	gb:NM_001780.1 /DEF=Homo sapiens CD63 antigen (melanoma 1 antigen) (CD63), mRNA. /FEA=mRNA /GEN=CD63 /PROD=CD63 antigen (melanoma 1 antigen) /DB_XREF=gi:4502678 /UG=Hs.76294 CD63 antigen (melanoma 1 antigen) /FL=gb:BC002349.1 gb:M59907.1 gb:NM_001780.1
200664_s_at	519.5	P	0.000732	Consensus includes gb:BG537255 /FEA=EST /DB_XREF=gi:13529117 /DB_XREF=est:602565318F1 /CLONE=IMAGE:4689748 /UG=Hs.82646 DnaJ (Hsp40) homolog, subfamily B, member 1 /FL=gb:BC002352.1 gb:NM_006145.1 gb:D49547.1
200665_s_at	1.3	A	0.919434	gb:NM_003118.1 /DEF=Homo sapiens secreted protein, acidic, cysteine-rich (osteonectin) (SPARC), mRNA. /FEA=mRNA /GEN=SPARC /PROD=secreted protein, acidic, cysteine-rich(osteonectin) /DB_XREF=gi:4507170 /UG=Hs.111779 secreted protein, acidic, cysteine-rich (osteonectin) /FL=gb:BC004974.1 gb:J03040.1 gb:NM_003118.1
200666_s_at	1081.1	P	0.000244	gb:NM_006145.1 /DEF=Homo sapiens heat shock 40kD protein 1 (HSPF1), mRNA. /FEA=mRNA /GEN=HSPF1 /PROD=heat shock 40kD protein 1 /DB_XREF=gi:5453689 /UG=Hs.82646 DnaJ (Hsp40) homolog, subfamily B, member 1 /FL=gb:BC002352.1 gb:NM_006145.1 gb:D49547.1
200667_at	1164.8	P	0.000244	Consensus includes gb:BF448062 /FEA=EST /DB_XREF=gi:11513123 /DB_XREF=est:7q97h09.x1 /CLONE=IMAGE:3706600 /UG=Hs.118797 ubiquitin-conjugating enzyme E2D 3 (homologous to yeast UBC45) /FL=gb:U39318.1 gb:BC003395.1 gb:NM_003340.1
200668_s_at	3079.5	P	0.000244	gb:BC003395.1 /DEF=Homo sapiens, ubiquitin-conjugating enzyme E2D 3 (homologous to yeast UBC45), clone MGC:5416, mRNA, complete cds. /FEA=mRNA /PROD=ubiquitin-conjugating enzyme E2D 3 (homologousto yeast UBC45) /DB_XREF=gi:13097281 /UG=Hs.118797 ubiquitin-conjugating enzyme E2D 3 (homologous to yeast UBC45) /FL=gb:U39318.1 gb:BC003395.1 gb:NM_003340.1
200669_s_at	2446.3	P	0.000244	gb:NM_003340.1 /DEF=Homo sapiens ubiquitin-conjugating enzyme E2D 3 (homologous to yeast UBC45) (UBE2D3), mRNA. /FEA=mRNA /GEN=UBE2D3 /PROD=ubiquitin-conjugating enzyme E2D 3 (homologousto yeast UBC45) /DB_XREF=gi:4507776 /UG=Hs.118797 ubiquitin-conjugating enzyme E2D 3 (homologous to yeast UBC45) /FL=gb:U39318.1 gb:BC003395.1 gb:NM_003340.1
200670_at	4003.0	P	0.000244	gb:NM_005080.1 /DEF=Homo sapiens X-box binding protein 1 (XBP1), mRNA. /FEA=mRNA /GEN=XBP1 /PROD=X-box binding protein 1 /DB_XREF=gi:4827057 /UG=Hs.149923 X-box binding protein 1 /FL=gb:BC000938.1 gb:M31627.1 gb:NM_005080.1
200671_s_at	17.6	A	0.246094	Consensus includes gb:N92501 /FEA=EST /DB_XREF=gi:1264810 /DB_XREF=est:zb28a07.s1 /CLONE=IMAGE:304884 /UG=Hs.107164 spectrin, beta, non-erythrocytic 1 /FL=gb:M96803.1 gb:NM_003128.1
200672_x_at	95.1	P	0.004150	gb:NM_003128.1 /DEF=Homo sapiens spectrin, beta, non-erythrocytic 1 (SPTBN1), mRNA. /FEA=mRNA /GEN=SPTBN1 /PROD=spectrin, beta, non-erythrocytic 1 /DB_XREF=gi:4507194 /UG=Hs.107164 spectrin, beta, non-erythrocytic 1 /FL=gb:M96803.1 gb:NM_003128.1
200673_at	5081.3	P	0.000244	gb:NM_014713.2 /DEF=Homo sapiens lysosomal-associated protein transmembrane 4 alpha (MBNT), mRNA. /FEA=mRNA /GEN=MBNT /PROD=lysosomal-associated protein transmembrane 4alpha /DB_XREF=gi:13518239 /UG=Hs.111894 lysosomal-associated protein transmembrane 4 alpha /FL=gb:BC000421.1 gb:BC003158.1 gb:NM_014713.2 gb:D14696.1
200674_s_at	11371.5	P	0.000244	gb:NM_000994.1 /DEF=Homo sapiens ribosomal protein L32 (RPL32), mRNA. /FEA=mRNA /GEN=RPL32 /PROD=ribosomal protein L32 /DB_XREF=gi:4506634 /UG=Hs.169793 ribosomal protein L32 /FL=gb:NM_000994.1
200675_at	1358.3	P	0.000244	gb:NM_004356.1 /DEF=Homo sapiens CD81 antigen (target of antiproliferative antibody 1) (CD81), mRNA. /FEA=mRNA /GEN=CD81 /PROD=CD81 antigen (target of antiproliferativeantibody 1) /DB_XREF=gi:4757943 /UG=Hs.54457 CD81 antigen (target of antiproliferative antibody 1) /FL=gb:BC002978.1 gb:M33680.1 gb:NM_004356.1
200676_s_at	41.1	P	0.002930	gb:NM_003347.1 /DEF=Homo sapiens ubiquitin-conjugating enzyme E2L 3 (UBE2L3), mRNA. /FEA=mRNA /GEN=UBE2L3 /PROD=ubiquitin-conjugating enzyme E2L 3 /DB_XREF=gi:4507788 /UG=Hs.108104 ubiquitin-conjugating enzyme E2L 3 /FL=gb:NM_003347.1
200677_at	4899.5	P	0.000244	gb:NM_004339.2 /DEF=Homo sapiens pituitary tumor-transforming 1 interacting protein (PTTG1IP), mRNA. /FEA=mRNA /GEN=PTTG1IP /PROD=pituitary tumor-transforming protein1-interacting protein precursor /DB_XREF=gi:11038670 /UG=Hs.111126 pituitary tumor-transforming 1 interacting protein /FL=gb:NM_004339.2 gb:BC000415.1 gb:AF149785.1
200678_x_at	1350.3	P	0.000732	gb:NM_002087.1 /DEF=Homo sapiens granulin (GRN), mRNA. /FEA=mRNA /GEN=GRN /PROD=granulin /DB_XREF=gi:4504150 /UG=Hs.180577 granulin /FL=gb:M75161.1 gb:AF055008.1 gb:NM_002087.1
200679_x_at	4799.3	P	0.000244	Consensus includes gb:BE311760 /FEA=EST /DB_XREF=gi:9148272 /DB_XREF=est:601143587F1 /CLONE=IMAGE:3507284 /UG=Hs.274472 high-mobility group (nonhistone chromosomal) protein 1 /FL=gb:BC003378.1 gb:NM_002128.1 gb:D63874.1
200680_x_at	8946.3	P	0.000244	gb:NM_002128.1 /DEF=Homo sapiens high-mobility group (nonhistone chromosomal) protein 1 (HMG1), mRNA. /FEA=mRNA /GEN=HMG1 /PROD=high-mobility group (nonhistone chromosomal)protein 1 /DB_XREF=gi:4504424 /UG=Hs.274472 high-mobility group (nonhistone chromosomal) protein 1 /FL=gb:BC003378.1 gb:NM_002128.1 gb:D63874.1
200681_at	2682.4	P	0.000244	gb:NM_006708.1 /DEF=Homo sapiens glyoxalase I (GLO1), mRNA. /FEA=mRNA /GEN=GLO1 /PROD=glyoxalase I /DB_XREF=gi:5729841 /UG=Hs.75207 glyoxalase I /FL=gb:BC001741.1 gb:L07837.1 gb:NM_006708.1
200682_s_at	3004.5	P	0.000244	Consensus includes gb:BG531983 /FEA=EST /DB_XREF=gi:13523521 /DB_XREF=est:602561007F1 /CLONE=IMAGE:4699176 /UG=Hs.108104 ubiquitin-conjugating enzyme E2L 3 /FL=gb:NM_003347.1
200683_s_at	503.2	P	0.000244	Consensus includes gb:BE964689 /FEA=EST /DB_XREF=gi:11768267 /DB_XREF=est:601658226R1 /CLONE=IMAGE:3885630 /UG=Hs.108104 ubiquitin-conjugating enzyme E2L 3 /FL=gb:NM_003347.1
200684_s_at	138.8	P	0.000732	Consensus includes gb:AI819709 /FEA=EST /DB_XREF=gi:5438788 /DB_XREF=est:wj77c07.x1 /CLONE=IMAGE:2408844 /UG=Hs.108104 ubiquitin-conjugating enzyme E2L 3 /FL=gb:NM_003347.1
200685_at	108.9	P	0.000244	Consensus includes gb:AU146237 /FEA=EST /DB_XREF=gi:11007758 /DB_XREF=est:AU146237 /CLONE=HEMBA1007233 /UG=Hs.11482 splicing factor, arginineserine-rich 11 /FL=gb:M74002.1 gb:NM_004768.1
200686_s_at	1821.5	P	0.000244	gb:NM_004768.1 /DEF=Homo sapiens splicing factor, arginineserine-rich 11 (SFRS11), mRNA. /FEA=mRNA /GEN=SFRS11 /PROD=splicing factor, arginineserine-rich 11 /DB_XREF=gi:4759099 /UG=Hs.11482 splicing factor, arginineserine-rich 11 /FL=gb:M74002.1 gb:NM_004768.1
200687_s_at	823.1	P	0.000244	gb:NM_012426.1 /DEF=Homo sapiens splicing factor 3b, subunit 3, 130kD (SF3B3), mRNA. /FEA=mRNA /GEN=SF3B3 /PROD=splicing factor 3b, subunit 3, 130kD /DB_XREF=gi:11034822 /UG=Hs.195614 splicing factor 3b, subunit 3, 130kD /FL=gb:NM_012426.1 gb:BC000463.1 gb:BC003146.1 gb:D13642.1 gb:D87686.1
200688_at	136.8	P	0.018555	gb:D13642.1 /DEF=Human mRNA for KIAA0017 gene, complete cds. /FEA=mRNA /GEN=KIAA0017 /DB_XREF=gi:285998 /UG=Hs.195614 splicing factor 3b, subunit 3, 130kD /FL=gb:NM_012426.1 gb:BC000463.1 gb:BC003146.1 gb:D13642.1 gb:D87686.1
200689_x_at	9109.0	P	0.000244	gb:NM_001404.1 /DEF=Homo sapiens eukaryotic translation elongation factor 1 gamma (EEF1G), mRNA. /FEA=mRNA /GEN=EEF1G /PROD=eukaryotic translation elongation factor 1gamma /DB_XREF=gi:4503480 /UG=Hs.2186 eukaryotic translation elongation factor 1 gamma /FL=gb:BC000384.1 gb:BC004189.1 gb:BC004215.1 gb:NM_001404.1
200690_at	144.9	P	0.001953	Consensus includes gb:AA927701 /FEA=EST /DB_XREF=gi:3076521 /DB_XREF=est:om72d09.s1 /CLONE=IMAGE:1552721 /UG=Hs.3069 heat shock 70kD protein 9B (mortalin-2) /FL=gb:BC000478.1 gb:L15189.1 gb:NM_004134.1
200691_s_at	2238.8	P	0.000244	gb:BC000478.1 /DEF=Homo sapiens, heat shock 70kD protein 9B (mortalin-2), clone MGC:8684, mRNA, complete cds. /FEA=mRNA /PROD=heat shock 70kD protein 9B (mortalin-2) /DB_XREF=gi:12653414 /UG=Hs.3069 heat shock 70kD protein 9B (mortalin-2) /FL=gb:BC000478.1 gb:L15189.1 gb:NM_004134.1
200692_s_at	1406.0	P	0.000244	gb:NM_004134.1 /DEF=Homo sapiens heat shock 70kD protein 9B (mortalin-2) (HSPA9B), mRNA. /FEA=mRNA /GEN=HSPA9B /PROD=heat shock 70kD protein 9B (mortalin-2) /DB_XREF=gi:4758569 /UG=Hs.3069 heat shock 70kD protein 9B (mortalin-2) /FL=gb:BC000478.1 gb:L15189.1 gb:NM_004134.1
200693_at	3448.7	P	0.000244	gb:NM_006826.1 /DEF=Homo sapiens tyrosine 3-monooxygenasetryptophan 5-monooxygenase activation protein, theta polypeptide (YWHAQ), mRNA. /FEA=mRNA /GEN=YWHAQ /PROD=tyrosine 3-monooxygenasetryptophan5-monooxygenase activation protein, theta polypeptide /DB_XREF=gi:5803226 /UG=Hs.74405 tyrosine 3-monooxygenasetryptophan 5-monooxygenase activation protein, theta polypeptide /FL=gb:NM_006826.1
200694_s_at	1611.8	P	0.000244	gb:NM_020414.2 /DEF=Homo sapiens DEADH (Asp-Glu-Ala-AspHis) box polypeptide 24 (DDX24), mRNA. /FEA=mRNA /GEN=DDX24 /PROD=DEADH (Asp-Glu-Ala-AspHis) box polypeptide 24 /DB_XREF=gi:13787212 /UG=Hs.155986 DEADH (Asp-Glu-Ala-AspHis) box polypeptide 24 /FL=gb:AL136886.1 gb:NM_020414.2 gb:AF214731.1
200695_at	174.4	P	0.010742	gb:NM_014225.1 /DEF=Homo sapiens protein phosphatase 2 (formerly 2A), regulatory subunit A (PR 65), alpha isoform (PPP2R1A), mRNA. /FEA=mRNA /GEN=PPP2R1A /PROD=protein phosphatase 2 (formerly 2A), regulatorysubunit A (PR 65), alpha isoform /DB_XREF=gi:7657474 /UG=Hs.173902 protein phosphatase 2 (formerly 2A), regulatory subunit A (PR 65), alpha isoform /FL=gb:J02902.1 gb:NM_014225.1
200696_s_at	1486.3	P	0.000244	gb:NM_000177.1 /DEF=Homo sapiens gelsolin (amyloidosis, Finnish type) (GSN), mRNA. /FEA=mRNA /GEN=GSN /PROD=gelsolin (amyloidosis, Finnish type) /DB_XREF=gi:4504164 /UG=Hs.290070 gelsolin (amyloidosis, Finnish type) /FL=gb:NM_000177.1
200697_at	1120.4	P	0.000732	gb:NM_000188.1 /DEF=Homo sapiens hexokinase 1 (HK1), nuclear gene encoding mitochondrial protein, mRNA. /FEA=mRNA /GEN=HK1 /PROD=hexokinase 1 /DB_XREF=gi:4504390 /UG=Hs.118625 hexokinase 1 /FL=gb:M75126.1 gb:NM_000188.1
200698_at	1565.4	P	0.000244	Consensus includes gb:AL542253 /FEA=EST /DB_XREF=gi:12874115 /DB_XREF=est:AL542253 /CLONE=CS0DE008YC08 (3 prime) /UG=Hs.118778 KDEL (Lys-Asp-Glu-Leu) endoplasmic reticulum protein retention receptor 2 /FL=gb:NM_006854.2
200699_at	711.9	P	0.000244	Consensus includes gb:BE962456 /FEA=EST /DB_XREF=gi:11765376 /DB_XREF=est:601655751R1 /CLONE=IMAGE:3846156 /UG=Hs.118778 KDEL (Lys-Asp-Glu-Leu) endoplasmic reticulum protein retention receptor 2 /FL=gb:NM_006854.2
200700_s_at	3960.5	P	0.000244	gb:NM_006854.2 /DEF=Homo sapiens KDEL (Lys-Asp-Glu-Leu) endoplasmic reticulum protein retention receptor 2 (KDELR2), mRNA. /FEA=mRNA /GEN=KDELR2 /PROD=KDEL receptor 2 /DB_XREF=gi:8051609 /UG=Hs.118778 KDEL (Lys-Asp-Glu-Leu) endoplasmic reticulum protein retention receptor 2 /FL=gb:NM_006854.2
200701_at	2359.5	P	0.000732	gb:NM_006432.1 /DEF=Homo sapiens epididymal secretory protein (19.5kD) (HE1), mRNA. /FEA=mRNA /GEN=HE1 /PROD=epididymal secretory protein (19.5kD) /DB_XREF=gi:5453677 /UG=Hs.119529 epididymal secretory protein (19.5kD) /FL=gb:BC002532.1 gb:NM_006432.1
200702_s_at	1020.2	P	0.000244	Consensus includes gb:BG421209 /FEA=EST /DB_XREF=gi:13327715 /DB_XREF=est:602451696F1 /CLONE=IMAGE:4590215 /UG=Hs.155986 DEADH (Asp-Glu-Ala-AspHis) box polypeptide 24 /FL=gb:AL136886.1 gb:NM_020414.2 gb:AF214731.1
200703_at	2865.4	P	0.000244	gb:NM_003746.1 /DEF=Homo sapiens dynein, cytoplasmic, light polypeptide (PIN), mRNA. /FEA=mRNA /GEN=PIN /PROD=dynein, cytoplasmic, light polypeptide /DB_XREF=gi:4505812 /UG=Hs.5120 dynein, cytoplasmic, light polypeptide /FL=gb:U32944.1 gb:NM_003746.1
200704_at	2275.8	P	0.000244	gb:AB034747.1 /DEF=Homo sapiens SIMPLE mRNA for small integral membrane protein of lysosomelate endosome, complete cds. /FEA=mRNA /GEN=SIMPLE /PROD=small integral membrane protein of lysosomelateendosome /DB_XREF=gi:12862475 /UG=Hs.76507 LPS-induced TNF-alpha factor /FL=gb:AB034747.1 gb:U77396.1 gb:AF010312.1 gb:NM_004862.1
200705_s_at	5827.4	P	0.000244	gb:NM_001959.1 /DEF=Homo sapiens eukaryotic translation elongation factor 1 beta 2 (EEF1B2), mRNA. /FEA=mRNA /GEN=EEF1B2 /PROD=eukaryotic translation elongation factor 1 beta2 /DB_XREF=gi:4503476 /UG=Hs.275959 eukaryotic translation elongation factor 1 beta 2 /FL=gb:BC004931.1 gb:NM_001959.1
200706_s_at	1553.8	P	0.000244	gb:NM_004862.1 /DEF=Homo sapiens LPS-induced TNF-alpha factor (PIG7), mRNA. /FEA=mRNA /GEN=PIG7 /PROD=LPS-induced TNF-alpha factor /DB_XREF=gi:4758913 /UG=Hs.76507 LPS-induced TNF-alpha factor /FL=gb:AB034747.1 gb:U77396.1 gb:AF010312.1 gb:NM_004862.1
200707_at	100.3	P	0.001953	gb:NM_002743.1 /DEF=Homo sapiens protein kinase C substrate 80K-H (PRKCSH), mRNA. /FEA=mRNA /GEN=PRKCSH /PROD=protein kinase C substrate 80K-H /DB_XREF=gi:4506076 /UG=Hs.1432 protein kinase C substrate 80K-H /FL=gb:J03075.1 gb:NM_002743.1 gb:AF144075.1
200708_at	697.5	P	0.000244	gb:NM_002080.1 /DEF=Homo sapiens glutamic-oxaloacetic transaminase 2, mitochondrial (aspartate aminotransferase 2) (GOT2), nuclear gene encoding mitochondrial protein, mRNA. /FEA=mRNA /GEN=GOT2 /PROD=aspartate aminotransferase 2 precursor /DB_XREF=gi:4504068 /UG=Hs.170197 glutamic-oxaloacetic transaminase 2, mitochondrial (aspartate aminotransferase 2) /FL=gb:BC000525.1 gb:M22632.1 gb:NM_002080.1
200709_at	364.3	P	0.000732	gb:NM_000801.1 /DEF=Homo sapiens FK506-binding protein 1A (12kD) (FKBP1A), mRNA. /FEA=mRNA /GEN=FKBP1A /PROD=FK506-binding protein 1A (12kD) /DB_XREF=gi:4503724 /UG=Hs.752 FK506-binding protein 1A (12kD) /FL=gb:BC001925.1 gb:M34539.1 gb:NM_000801.1
200710_at	762.3	P	0.000244	gb:NM_000018.1 /DEF=Homo sapiens acyl-Coenzyme A dehydrogenase, very long chain (ACADVL), nuclear gene encoding mitochondrial protein, mRNA. /FEA=mRNA /GEN=ACADVL /PROD=acyl-Coenzyme A dehydrogenase, very long chainprecursor /DB_XREF=gi:4557234 /UG=Hs.82208 acyl-Coenzyme A dehydrogenase, very long chain /FL=gb:D43682.1 gb:BC000399.1 gb:NM_000018.1
200711_s_at	1359.0	P	0.000244	gb:NM_003197.2 /DEF=Homo sapiens transcription elongation factor B (SIII), polypeptide 1-like (TCEB1L), mRNA. /FEA=mRNA /GEN=TCEB1L /PROD=transcription elongation factor B polypeptide1-like /DB_XREF=gi:6006030 /UG=Hs.171626 transcription elongation factor B (SIII), polypeptide 1-like /FL=gb:NM_003197.2
200712_s_at	298.3	P	0.000244	Consensus includes gb:AI633566 /FEA=EST /DB_XREF=gi:4684896 /DB_XREF=est:th68f09.x1 /CLONE=IMAGE:2123849 /UG=Hs.234279 microtubule-associated protein, RPEB family, member 1 /FL=gb:NM_012325.1 gb:U24166.1
200713_s_at	1409.8	P	0.000244	gb:NM_012325.1 /DEF=Homo sapiens microtubule-associated protein, RPEB family, member 1 (MAPRE1), mRNA. /FEA=mRNA /GEN=MAPRE1 /PROD=microtubule-associated protein, RPEB family,member 1 /DB_XREF=gi:6912493 /UG=Hs.234279 microtubule-associated protein, RPEB family, member 1 /FL=gb:NM_012325.1 gb:U24166.1
200714_x_at	609.2	P	0.000732	gb:NM_006812.1 /DEF=Homo sapiens amplified in osteosarcoma (OS-9), mRNA. /FEA=mRNA /GEN=OS-9 /PROD=amplified in osteosarcoma /DB_XREF=gi:5803108 /UG=Hs.76228 amplified in osteosarcoma /FL=gb:U41635.1 gb:AB002806.1 gb:NM_006812.1
200715_x_at	6319.1	P	0.000244	gb:BC000514.1 /DEF=Homo sapiens, ribosomal protein L13a, clone MGC:8547, mRNA, complete cds. /FEA=mRNA /PROD=ribosomal protein L13a /DB_XREF=gi:12653484 /UG=Hs.119122 ribosomal protein L13a /FL=gb:BC000514.1 gb:NM_012423.1
200716_x_at	12992.8	P	0.000244	gb:NM_012423.1 /DEF=Homo sapiens ribosomal protein L13a (RPL13A), mRNA. /FEA=mRNA /GEN=RPL13A /PROD=ribosomal protein L13a /DB_XREF=gi:6912633 /UG=Hs.119122 ribosomal protein L13a /FL=gb:BC000514.1 gb:NM_012423.1
200717_x_at	13768.5	P	0.000244	gb:NM_000971.1 /DEF=Homo sapiens ribosomal protein L7 (RPL7), mRNA. /FEA=mRNA /GEN=RPL7 /PROD=ribosomal protein L7 /DB_XREF=gi:4506658 /UG=Hs.153 ribosomal protein L7 /FL=gb:L16558.1 gb:NM_000971.1
200718_s_at	10083.8	P	0.000244	Consensus includes gb:AA927664 /FEA=EST /DB_XREF=gi:3076484 /DB_XREF=est:om71h10.s1 /CLONE=IMAGE:1552675 /UG=Hs.171626 transcription elongation factor B (SIII), polypeptide 1-like /FL=gb:NM_003197.2
200719_at	226.6	P	0.000244	Consensus includes gb:BE964043 /FEA=EST /DB_XREF=gi:11767371 /DB_XREF=est:601657616R1 /CLONE=IMAGE:3875955 /UG=Hs.171626 transcription elongation factor B (SIII), polypeptide 1-like /FL=gb:NM_003197.2
200720_s_at	256.5	P	0.000244	Consensus includes gb:AL532341 /FEA=EST /DB_XREF=gi:12795834 /DB_XREF=est:AL532341 /CLONE=CS0DM014YJ21 (5 prime) /UG=Hs.153961 ARP1 (actin-related protein 1, yeast) homolog A (centractin alpha) /FL=gb:BC000693.1 gb:NM_005736.2
200721_s_at	260.2	P	0.000732	gb:NM_005736.2 /DEF=Homo sapiens ARP1 (actin-related protein 1, yeast) homolog A (centractin alpha) (ACTR1A), mRNA. /FEA=mRNA /GEN=ACTR1A /PROD=actin-related protein 1A /DB_XREF=gi:13325058 /UG=Hs.153961 ARP1 (actin-related protein 1, yeast) homolog A (centractin alpha) /FL=gb:BC000693.1 gb:NM_005736.2
200722_s_at	238.9	P	0.000244	Consensus includes gb:BG258784 /FEA=EST /DB_XREF=gi:12768600 /DB_XREF=est:602378049F1 /CLONE=IMAGE:4508820 /UG=Hs.278672 membrane component, chromosome 11, surface marker 1 /FL=gb:BC001731.1 gb:NM_005898.1
200723_s_at	1786.3	P	0.000244	gb:NM_005898.1 /DEF=Homo sapiens membrane component, chromosome 11, surface marker 1 (M11S1), mRNA. /FEA=mRNA /GEN=M11S1 /PROD=membrane component, chromosome 11, surfacemarker 1 /DB_XREF=gi:5174502 /UG=Hs.278672 membrane component, chromosome 11, surface marker 1 /FL=gb:BC001731.1 gb:NM_005898.1
200724_at	36.9	P	0.018555	gb:BC003358.1 /DEF=Homo sapiens, ribosomal protein L10, clone MGC:5189, mRNA, complete cds. /FEA=mRNA /PROD=ribosomal protein L10 /DB_XREF=gi:13097176 /UG=Hs.29797 ribosomal protein L10 /FL=gb:BC003358.1 gb:M73791.1 gb:M64241.1 gb:NM_006013.1
200725_x_at	9054.8	P	0.000244	gb:NM_006013.1 /DEF=Homo sapiens ribosomal protein L10 (RPL10), mRNA. /FEA=mRNA /GEN=RPL10 /PROD=ribosomal protein L10 /DB_XREF=gi:5174430 /UG=Hs.29797 ribosomal protein L10 /FL=gb:BC003358.1 gb:M73791.1 gb:M64241.1 gb:NM_006013.1
200726_at	2737.1	P	0.000244	gb:NM_002710.1 /DEF=Homo sapiens protein phosphatase 1, catalytic subunit, gamma isoform (PPP1CC), mRNA. /FEA=mRNA /GEN=PPP1CC /PROD=protein phosphatase 1, catalytic subunit, gammaisoform /DB_XREF=gi:4506006 /UG=Hs.79081 protein phosphatase 1, catalytic subunit, gamma isoform /FL=gb:NM_002710.1
200727_s_at	254.1	P	0.000244	Consensus includes gb:AA699583 /FEA=EST /DB_XREF=gi:2703730 /DB_XREF=est:zi42g07.s1 /CLONE=IMAGE:433500 /UG=Hs.42915 ARP2 (actin-related protein 2, yeast) homolog /FL=gb:AF006082.1 gb:NM_005722.1
200728_at	4131.1	P	0.000244	Consensus includes gb:BE566290 /FEA=EST /DB_XREF=gi:9810010 /DB_XREF=est:601339864F1 /CLONE=IMAGE:3682406 /UG=Hs.42915 ARP2 (actin-related protein 2, yeast) homolog /FL=gb:AF006082.1 gb:NM_005722.1
200729_s_at	2771.5	P	0.000244	gb:NM_005722.1 /DEF=Homo sapiens ARP2 (actin-related protein 2, yeast) homolog (ACTR2), mRNA. /FEA=mRNA /GEN=ACTR2 /PROD=ARP2 (actin-related protein 2, yeast) homolog /DB_XREF=gi:5031570 /UG=Hs.42915 ARP2 (actin-related protein 2, yeast) homolog /FL=gb:AF006082.1 gb:NM_005722.1
200730_s_at	782.7	P	0.000244	Consensus includes gb:BF576710 /FEA=EST /DB_XREF=gi:11650422 /DB_XREF=est:602135085F1 /CLONE=IMAGE:4290141 /UG=Hs.227777 protein tyrosine phosphatase type IVA, member 1 /FL=gb:U48296.1 gb:NM_003463.1
200731_s_at	1026.8	P	0.000244	Consensus includes gb:AW165960 /FEA=EST /DB_XREF=gi:6397485 /DB_XREF=est:xf43a12.x1 /CLONE=IMAGE:2620798 /UG=Hs.227777 protein tyrosine phosphatase type IVA, member 1 /FL=gb:U48296.1 gb:NM_003463.1
200732_s_at	1849.7	P	0.000244	Consensus includes gb:AL578310 /FEA=EST /DB_XREF=gi:12942259 /DB_XREF=est:AL578310 /CLONE=CS0DK010YM06 (3 prime) /UG=Hs.227777 protein tyrosine phosphatase type IVA, member 1 /FL=gb:U48296.1 gb:NM_003463.1
200733_s_at	1637.2	P	0.000732	gb:U48296.1 /DEF=Homo sapiens protein tyrosine phosphatase PTPCAAX1 (hPTPCAAX1) mRNA, complete cds. /FEA=mRNA /GEN=hPTPCAAX1 /PROD=protein tyrosine phosphatase PTPCAAX1 /DB_XREF=gi:1777754 /UG=Hs.227777 protein tyrosine phosphatase type IVA, member 1 /FL=gb:U48296.1 gb:NM_003463.1
200734_s_at	1114.1	P	0.000244	Consensus includes gb:BG341906 /FEA=EST /DB_XREF=gi:13148344 /DB_XREF=est:602463246F1 /CLONE=IMAGE:4576258 /UG=Hs.119177 ADP-ribosylation factor 3 /FL=gb:M74491.1 gb:NM_001659.1
200735_x_at	11568.1	P	0.000244	gb:NM_005594.1 /DEF=Homo sapiens nascent-polypeptide-associated complex alpha polypeptide (NACA), mRNA. /FEA=mRNA /GEN=NACA /PROD=nascent-polypeptide-associated complex alphapolypeptide /DB_XREF=gi:5031930 /UG=Hs.32916 nascent-polypeptide-associated complex alpha polypeptide /FL=gb:AF054187.1 gb:NM_005594.1
200736_s_at	0.6	A	0.969727	gb:NM_000581.1 /DEF=Homo sapiens glutathione peroxidase 1 (GPX1), mRNA. /FEA=mRNA /GEN=GPX1 /PROD=glutathione peroxidase 1 /DB_XREF=gi:10834975 /UG=Hs.76686 glutathione peroxidase 1 /FL=gb:NM_000581.1 gb:BC000742.1 gb:M21304.1
200737_at	1051.1	P	0.000244	gb:NM_000291.1 /DEF=Homo sapiens phosphoglycerate kinase 1 (PGK1), mRNA. /FEA=mRNA /GEN=PGK1 /PROD=phosphoglycerate kinase 1 /DB_XREF=gi:4505762 /UG=Hs.78771 phosphoglycerate kinase 1 /FL=gb:NM_000291.1
200738_s_at	5961.2	P	0.000244	gb:NM_000291.1 /DEF=Homo sapiens phosphoglycerate kinase 1 (PGK1), mRNA. /FEA=mRNA /GEN=PGK1 /PROD=phosphoglycerate kinase 1 /DB_XREF=gi:4505762 /UG=Hs.78771 phosphoglycerate kinase 1 /FL=gb:NM_000291.1
200739_s_at	628.9	P	0.000244	Consensus includes gb:BG338532 /FEA=EST /DB_XREF=gi:13144970 /DB_XREF=est:602436260F1 /CLONE=IMAGE:4554278 /UG=Hs.85119 SMT3 (suppressor of mif two 3, yeast) homolog 1 /FL=gb:BC000036.1 gb:NM_006936.1
200740_s_at	5060.9	P	0.000244	gb:NM_006936.1 /DEF=Homo sapiens SMT3 (suppressor of mif two 3, yeast) homolog 1 (SMT3H1), mRNA. /FEA=mRNA /GEN=SMT3H1 /PROD=SMT3 (suppressor of mif two 3, yeast) homolog 1 /DB_XREF=gi:5902095 /UG=Hs.85119 SMT3 (suppressor of mif two 3, yeast) homolog 1 /FL=gb:BC000036.1 gb:NM_006936.1
200741_s_at	13149.9	P	0.000244	gb:NM_001030.1 /DEF=Homo sapiens ribosomal protein S27 (metallopanstimulin 1) (RPS27), mRNA. /FEA=mRNA /GEN=RPS27 /PROD=ribosomal protein S27 (metallopanstimulin 1) /DB_XREF=gi:4506710 /UG=Hs.195453 ribosomal protein S27 (metallopanstimulin 1) /FL=gb:U57847.1 gb:L19739.1 gb:NM_001030.1
200742_s_at	108.2	P	0.000244	Consensus includes gb:BG231932 /FEA=EST /DB_XREF=gi:12727071 /DB_XREF=est:naf34b12.x1 /CLONE=IMAGE:4142926 /UG=Hs.20478 ceroid-lipofuscinosis, neuronal 2, late infantile (Jansky-Bielschowsky disease) /FL=gb:AF017456.1 gb:NM_000391.2
200743_s_at	352.8	P	0.000244	gb:NM_000391.2 /DEF=Homo sapiens ceroid-lipofuscinosis, neuronal 2, late infantile (Jansky-Bielschowsky disease) (CLN2), mRNA. /FEA=mRNA /GEN=CLN2 /PROD=ceroid-lipofuscinosis, neuronal 2, lateinfantile (Jansky-Bielschowsky disease) /DB_XREF=gi:5597012 /UG=Hs.20478 ceroid-lipofuscinosis, neuronal 2, late infantile (Jansky-Bielschowsky disease) /FL=gb:AF017456.1 gb:NM_000391.2
200744_s_at	1038.2	P	0.000244	Consensus includes gb:AI741124 /FEA=EST /DB_XREF=gi:5109412 /DB_XREF=est:wg19c04.x1 /CLONE=IMAGE:2365542 /UG=Hs.215595 guanine nucleotide binding protein (G protein), beta polypeptide 1 /FL=gb:NM_002074.1 gb:BC004186.1
200745_s_at	875.5	P	0.000244	Consensus includes gb:AF070603.1 /DEF=Homo sapiens clone 24584 beta-subunit signal transducing proteins GSGI mRNA, partial cds. /FEA=mRNA /PROD=beta-subunit signal transducing proteins GSGI /DB_XREF=gi:3387983 /UG=Hs.215595 guanine nucleotide binding protein (G protein), beta polypeptide 1 /FL=gb:NM_002074.1 gb:BC004186.1
200746_s_at	1362.8	P	0.000244	gb:NM_002074.1 /DEF=Homo sapiens guanine nucleotide binding protein (G protein), beta polypeptide 1 (GNB1), mRNA. /FEA=mRNA /GEN=GNB1 /PROD=guanine nucleotide binding protein (G protein),beta polypeptide 1 /DB_XREF=gi:11321584 /UG=Hs.215595 guanine nucleotide binding protein (G protein), beta polypeptide 1 /FL=gb:NM_002074.1 gb:BC004186.1
200747_s_at	591.1	P	0.000732	gb:NM_006185.1 /DEF=Homo sapiens nuclear mitotic apparatus protein 1 (NUMA1), mRNA. /FEA=mRNA /GEN=NUMA1 /PROD=nuclear mitotic apparatus protein 1 /DB_XREF=gi:5453819 /UG=Hs.301512 nuclear mitotic apparatus protein 1 /FL=gb:NM_006185.1
200748_s_at	16849.8	P	0.000244	gb:NM_002032.1 /DEF=Homo sapiens ferritin, heavy polypeptide 1 (FTH1), mRNA. /FEA=mRNA /GEN=FTH1 /PROD=ferritin, heavy polypeptide 1 /DB_XREF=gi:4503794 /UG=Hs.62954 ferritin, heavy polypeptide 1 /FL=gb:BC000857.1 gb:BC001399.1 gb:M11146.1 gb:M12937.1 gb:M97164.1 gb:NM_002032.1 gb:L20941.1
200749_at	1271.8	P	0.000244	Consensus includes gb:BF112006 /FEA=EST /DB_XREF=gi:10941619 /DB_XREF=est:7l37e05.x1 /CLONE=IMAGE:3523665 /UG=Hs.10842 RAN, member RAS oncogene family /FL=gb:BC000852.1 gb:BC004272.1 gb:M31469.1 gb:AF052578.1 gb:AF054183.1 gb:NM_006325.2
200750_s_at	6783.3	P	0.000244	gb:AF054183.1 /DEF=Homo sapiens GTP binding protein mRNA, complete cds. /FEA=mRNA /PROD=GTP binding protein /DB_XREF=gi:4092053 /UG=Hs.10842 RAN, member RAS oncogene family /FL=gb:BC000852.1 gb:BC004272.1 gb:M31469.1 gb:AF052578.1 gb:AF054183.1 gb:NM_006325.2
200751_s_at	6058.7	P	0.000244	Consensus includes gb:BE898861 /FEA=EST /DB_XREF=gi:10365758 /DB_XREF=est:601682157F1 /CLONE=IMAGE:3952046 /UG=Hs.182447 heterogeneous nuclear ribonucleoprotein C (C1C2) /FL=gb:BC003394.1 gb:M16342.1 gb:NM_004500.1
200752_s_at	114.5	P	0.002930	gb:NM_005186.2 /DEF=Homo sapiens calpain 1, (muI) large subunit (CAPN1), mRNA. /FEA=mRNA /GEN=CAPN1 /PROD=calpain 1, large subunit /DB_XREF=gi:12408655 /UG=Hs.2575 calpain 1, (muI) large subunit /FL=gb:NM_005186.2
200753_x_at	942.9	P	0.000244	Consensus includes gb:BE866585 /FEA=EST /DB_XREF=gi:10315361 /DB_XREF=est:601678773F1 /CLONE=IMAGE:3961243 /UG=Hs.73965 splicing factor, arginineserine-rich 2 /FL=gb:BC000339.1 gb:BC001303.1 gb:M90104.1 gb:NM_003016.1
200754_x_at	3133.0	P	0.000244	gb:NM_003016.1 /DEF=Homo sapiens splicing factor, arginineserine-rich 2 (SFRS2), mRNA. /FEA=mRNA /GEN=SFRS2 /PROD=splicing factor, arginineserine-rich 2 /DB_XREF=gi:4506898 /UG=Hs.73965 splicing factor, arginineserine-rich 2 /FL=gb:BC000339.1 gb:BC001303.1 gb:M90104.1 gb:NM_003016.1
200755_s_at	238.3	P	0.000244	Consensus includes gb:BF939365 /FEA=EST /DB_XREF=gi:12356685 /DB_XREF=est:nad87h04.x1 /CLONE=IMAGE:3410551 /UG=Hs.7753 calumenin /FL=gb:U67280.1 gb:AF013759.1 gb:NM_001219.2
200756_x_at	173.7	P	0.005859	gb:U67280.1 /DEF=Homo sapiens calumenin mRNA, complete cds. /FEA=mRNA /PROD=calumenin /DB_XREF=gi:2809323 /UG=Hs.7753 calumenin /FL=gb:U67280.1 gb:AF013759.1 gb:NM_001219.2
200757_s_at	643.1	P	0.000244	gb:NM_001219.2 /DEF=Homo sapiens calumenin (CALU), mRNA. /FEA=mRNA /GEN=CALU /PROD=calumenin precursor /DB_XREF=gi:6005991 /UG=Hs.7753 calumenin /FL=gb:U67280.1 gb:AF013759.1 gb:NM_001219.2
200758_s_at	852.8	P	0.000244	Consensus includes gb:AI361227 /FEA=EST /DB_XREF=gi:4112848 /DB_XREF=est:qy12a07.x1 /CLONE=IMAGE:2011764 /UG=Hs.83469 nuclear factor (erythroid-derived 2)-like 1 /FL=gb:NM_003204.1 gb:U08853.1
200759_x_at	1404.6	P	0.000732	gb:NM_003204.1 /DEF=Homo sapiens nuclear factor (erythroid-derived 2)-like 1 (NFE2L1), mRNA. /FEA=mRNA /GEN=NFE2L1 /PROD=transcription factor 11 (basic leucine zippertype) /DB_XREF=gi:4505378 /UG=Hs.83469 nuclear factor (erythroid-derived 2)-like 1 /FL=gb:NM_003204.1 gb:U08853.1
200760_s_at	1536.6	P	0.000244	Consensus includes gb:N92494 /FEA=EST /DB_XREF=gi:1264803 /DB_XREF=est:zb12h11.s1 /CLONE=IMAGE:301893 /UG=Hs.92384 vitamin A responsive; cytoskeleton related /FL=gb:BC005143.1 gb:AF070523.1 gb:AF125530.1 gb:AF161476.1 gb:NM_006407.2
200761_s_at	1674.2	P	0.000244	gb:NM_006407.2 /DEF=Homo sapiens vitamin A responsive; cytoskeleton related (JWA), mRNA. /FEA=mRNA /GEN=JWA /PROD=vitamin A responsive; cytoskeleton related /DB_XREF=gi:7669496 /UG=Hs.92384 vitamin A responsive; cytoskeleton related /FL=gb:BC005143.1 gb:AF070523.1 gb:AF125530.1 gb:AF161476.1 gb:NM_006407.2
200762_at	214.0	P	0.000244	gb:NM_001386.1 /DEF=Homo sapiens dihydropyrimidinase-like 2 (DPYSL2), mRNA. /FEA=mRNA /GEN=DPYSL2 /PROD=dihydropyrimidinase-like 2 /DB_XREF=gi:4503376 /UG=Hs.173381 dihydropyrimidinase-like 2 /FL=gb:U17279.1 gb:D78013.1 gb:U97105.1 gb:NM_001386.1
200763_s_at	11838.4	P	0.000244	gb:NM_001003.1 /DEF=Homo sapiens ribosomal protein, large, P1 (RPLP1), mRNA. /FEA=mRNA /GEN=RPLP1 /PROD=ribosomal protein, large, P1 /DB_XREF=gi:4506668 /UG=Hs.177592 ribosomal protein, large, P1 /FL=gb:BC003369.1 gb:M17886.1 gb:NM_001003.1
200764_s_at	843.8	P	0.000244	Consensus includes gb:AI826881 /FEA=EST /DB_XREF=gi:5447552 /DB_XREF=est:wk75f03.x1 /CLONE=IMAGE:2421245 /UG=Hs.178452 catenin (cadherin-associated protein), alpha 1 (102kD) /FL=gb:L23805.1 gb:NM_001903.1
200765_x_at	2083.9	P	0.000244	gb:NM_001903.1 /DEF=Homo sapiens catenin (cadherin-associated protein), alpha 1 (102kD) (CTNNA1), mRNA. /FEA=mRNA /GEN=CTNNA1 /PROD=catenin (cadherin-associated protein), alpha 1(102kD) /DB_XREF=gi:4503126 /UG=Hs.178452 catenin (cadherin-associated protein), alpha 1 (102kD) /FL=gb:L23805.1 gb:NM_001903.1
200766_at	145.3	P	0.000244	gb:NM_001909.1 /DEF=Homo sapiens cathepsin D (lysosomal aspartyl protease) (CTSD), mRNA. /FEA=mRNA /GEN=CTSD /PROD=cathepsin D (lysosomal aspartyl protease) /DB_XREF=gi:4503142 /UG=Hs.79572 cathepsin D (lysosomal aspartyl protease) /FL=gb:M11233.1 gb:NM_001909.1
200767_s_at	426.6	P	0.000244	gb:NM_014612.1 /DEF=Homo sapiens C9orf10 protein (C9orf10), mRNA. /FEA=mRNA /GEN=C9orf10 /PROD=C9orf10 protein /DB_XREF=gi:8922113 /UG=Hs.76666 C9orf10 protein /FL=gb:AF214737.1 gb:NM_014612.1
200768_s_at	1492.1	P	0.000244	gb:BC001686.1 /DEF=Homo sapiens, methionine adenosyltransferase II, alpha, clone MGC:2907, mRNA, complete cds. /FEA=mRNA /PROD=methionine adenosyltransferase II, alpha /DB_XREF=gi:12804546 /UG=Hs.77502 methionine adenosyltransferase II, alpha /FL=gb:BC001686.1 gb:BC001854.1 gb:NM_005911.1
200769_s_at	130.0	P	0.008057	gb:NM_005911.1 /DEF=Homo sapiens methionine adenosyltransferase II, alpha (MAT2A), mRNA. /FEA=mRNA /GEN=MAT2A /PROD=methionine adenosyltransferase II, alpha /DB_XREF=gi:5174528 /UG=Hs.77502 methionine adenosyltransferase II, alpha /FL=gb:BC001686.1 gb:BC001854.1 gb:NM_005911.1
200770_s_at	310.8	P	0.000244	gb:J03202.1 /DEF=Human laminin B2 chain mRNA, complete cds. /FEA=mRNA /GEN=LAMB2 /DB_XREF=gi:186916 /UG=Hs.214982 laminin, gamma 1 (formerly LAMB2) /FL=gb:J03202.1 gb:NM_002293.2
200771_at	494.4	P	0.000244	gb:NM_002293.2 /DEF=Homo sapiens laminin, gamma 1 (formerly LAMB2) (LAMC1), mRNA. /FEA=mRNA /GEN=LAMC1 /PROD=laminin, gamma 1 precursor /DB_XREF=gi:9845497 /UG=Hs.214982 laminin, gamma 1 (formerly LAMB2) /FL=gb:J03202.1 gb:NM_002293.2
200772_x_at	10437.4	P	0.000244	Consensus includes gb:BF686442 /FEA=EST /DB_XREF=gi:11971850 /DB_XREF=est:602143234F1 /CLONE=IMAGE:4304193 /UG=Hs.250655 prothymosin, alpha (gene sequence 28) /FL=gb:BC003510.1 gb:M26708.1 gb:M14630.1 gb:NM_002823.1
200773_x_at	8440.0	P	0.000244	gb:NM_002823.1 /DEF=Homo sapiens prothymosin, alpha (gene sequence 28) (PTMA), mRNA. /FEA=mRNA /GEN=PTMA /PROD=prothymosin, alpha (gene sequence 28) /DB_XREF=gi:4506276 /UG=Hs.250655 prothymosin, alpha (gene sequence 28) /FL=gb:BC003510.1 gb:M26708.1 gb:M14630.1 gb:NM_002823.1
200774_at	5671.6	P	0.000244	Consensus includes gb:BE963765 /FEA=EST /DB_XREF=gi:11767182 /DB_XREF=est:601657412R1 /CLONE=IMAGE:3875738 /UG=Hs.76666 C9orf10 protein /FL=gb:AF214737.1 gb:NM_014612.1
200775_s_at	5279.4	P	0.000244	gb:BC000355.1 /DEF=Homo sapiens, heterogeneous nuclear ribonucleoprotein K, clone MGC:8660, mRNA, complete cds. /FEA=mRNA /PROD=heterogeneous nuclear ribonucleoprotein K /DB_XREF=gi:12653174 /UG=Hs.129548 heterogeneous nuclear ribonucleoprotein K /FL=gb:BC000355.1 gb:NM_002140.1
200776_s_at	934.9	P	0.000244	Consensus includes gb:AL518328 /FEA=EST /DB_XREF=gi:12781821 /DB_XREF=est:AL518328 /CLONE=CS0DA009YK18 (3 prime) /UG=Hs.155291 KIAA0005 gene product /FL=gb:D13630.1 gb:NM_014670.1
200777_s_at	2670.1	P	0.000244	gb:NM_014670.1 /DEF=Homo sapiens KIAA0005 gene product (KIAA0005), mRNA. /FEA=mRNA /GEN=KIAA0005 /PROD=KIAA0005 gene product /DB_XREF=gi:7661849 /UG=Hs.155291 KIAA0005 gene product /FL=gb:D13630.1 gb:NM_014670.1
200778_s_at	1401.5	P	0.000244	Consensus includes gb:AI191427 /FEA=EST /DB_XREF=gi:3742636 /DB_XREF=est:qe48g03.x1 /CLONE=IMAGE:1742260 /UG=Hs.155595 neural precursor cell expressed, developmentally down-regulated 5 /FL=gb:D28540.1 gb:NM_004404.1 gb:D63878.1
200779_at	2822.1	P	0.000244	gb:NM_001675.1 /DEF=Homo sapiens activating transcription factor 4 (tax-responsive enhancer element B67) (ATF4), mRNA. /FEA=mRNA /GEN=ATF4 /PROD=activating transcription factor 4 /DB_XREF=gi:4502264 /UG=Hs.181243 activating transcription factor 4 (tax-responsive enhancer element B67) /FL=gb:M86842.1 gb:NM_001675.1
200780_x_at	13648.4	P	0.000244	gb:NM_000516.2 /DEF=Homo sapiens guanine nucleotide binding protein (G protein), alpha stimulating activity polypeptide 1 (GNAS1), mRNA. /FEA=mRNA /GEN=GNAS1 /PROD=guanine nucleotide binding protein (G protein),alpha stimulating activity polypeptide 1 /DB_XREF=gi:8659565 /UG=Hs.273385 guanine nucleotide binding protein (G protein), alpha stimulating activity polypeptide 1 /FL=gb:BC002722.1 gb:AF0…
200781_s_at	11518.1	P	0.000244	gb:NM_001019.1 /DEF=Homo sapiens ribosomal protein S15a (RPS15A), mRNA. /FEA=mRNA /GEN=RPS15A /PROD=ribosomal protein S15a /DB_XREF=gi:4506688 /UG=Hs.2953 ribosomal protein S15a /FL=gb:BC001697.1 gb:NM_001019.1
200782_at	1060.9	P	0.000244	gb:NM_001154.2 /DEF=Homo sapiens annexin A5 (ANXA5), mRNA. /FEA=mRNA /GEN=ANXA5 /PROD=annexin V /DB_XREF=gi:4809273 /UG=Hs.300711 annexin A5 /FL=gb:BC001429.1 gb:BC004993.1 gb:M18366.1 gb:J03745.1 gb:M21731.1 gb:M19384.1 gb:D00172.1 gb:NM_001154.2
200783_s_at	524.9	P	0.000732	gb:NM_005563.2 /DEF=Homo sapiens leukemia-associated phosphoprotein p18 (stathmin) (LAP18), mRNA. /FEA=mRNA /GEN=LAP18 /PROD=leukemia-associated phosphoprotein p18 /DB_XREF=gi:13518023 /UG=Hs.81915 leukemia-associated phosphoprotein p18 (stathmin) /FL=gb:NM_005563.2 gb:J04991.1
200784_s_at	9.0	A	0.780518	Consensus includes gb:BF304759 /FEA=EST /DB_XREF=gi:11251657 /DB_XREF=est:601888339F1 /CLONE=IMAGE:4122417 /UG=Hs.89137 low density lipoprotein-related protein 1 (alpha-2-macroglobulin receptor) /FL=gb:NM_002332.1
200785_s_at	9.7	A	0.366211	gb:NM_002332.1 /DEF=Homo sapiens low density lipoprotein-related protein 1 (alpha-2-macroglobulin receptor) (LRP1), mRNA. /FEA=mRNA /GEN=LRP1 /PROD=low density lipoprotein-related protein 1(alpha-2-macroglobulin receptor) /DB_XREF=gi:4758685 /UG=Hs.89137 low density lipoprotein-related protein 1 (alpha-2-macroglobulin receptor) /FL=gb:NM_002332.1
200786_at	3055.2	P	0.000244	gb:NM_002799.1 /DEF=Homo sapiens proteasome (prosome, macropain) subunit, beta type, 7 (PSMB7), mRNA. /FEA=mRNA /GEN=PSMB7 /PROD=proteasome (prosome, macropain) subunit, betatype, 7 /DB_XREF=gi:4506202 /UG=Hs.118065 proteasome (prosome, macropain) subunit, beta type, 7 /FL=gb:BC000509.1 gb:D38048.1 gb:NM_002799.1
200787_s_at	74.7	P	0.000244	gb:BC002426.1 /DEF=Homo sapiens, phosphoprotein enriched in astrocytes 15, clone MGC:1685, mRNA, complete cds. /FEA=mRNA /PROD=phosphoprotein enriched in astrocytes 15 /DB_XREF=gi:12803230 /UG=Hs.194673 phosphoprotein enriched in astrocytes 15 /FL=gb:BC002426.1 gb:NM_003768.1
200788_s_at	515.7	P	0.000732	gb:NM_003768.1 /DEF=Homo sapiens phosphoprotein enriched in astrocytes 15 (PEA15), mRNA. /FEA=mRNA /GEN=PEA15 /PROD=phosphoprotein enriched in astrocytes 15 /DB_XREF=gi:4505704 /UG=Hs.194673 phosphoprotein enriched in astrocytes 15 /FL=gb:BC002426.1 gb:NM_003768.1
200789_at	1891.8	P	0.002930	gb:NM_001398.1 /DEF=Homo sapiens enoyl Coenzyme A hydratase 1, peroxisomal (ECH1), mRNA. /FEA=mRNA /GEN=ECH1 /PROD=peroxisomal enoyl-coenzyme A hydratase-likeprotein /DB_XREF=gi:4503446 /UG=Hs.196176 enoyl Coenzyme A hydratase 1, peroxisomal /FL=gb:NM_001398.1 gb:U16660.1
200790_at	1316.4	P	0.000244	gb:NM_002539.1 /DEF=Homo sapiens ornithine decarboxylase 1 (ODC1) mRNA. /FEA=mRNA /GEN=ODC1 /PROD=ornithine decarboxylase 1 /DB_XREF=gi:4505488 /UG=Hs.75212 ornithine decarboxylase 1 /FL=gb:M16650.1 gb:NM_002539.1
200791_s_at	1471.0	P	0.000244	gb:NM_003870.1 /DEF=Homo sapiens IQ motif containing GTPase activating protein 1 (IQGAP1), mRNA. /FEA=mRNA /GEN=IQGAP1 /PROD=IQ motif containing GTPase activating protein 1 /DB_XREF=gi:4506786 /UG=Hs.1742 IQ motif containing GTPase activating protein 1 /FL=gb:NM_003870.1 gb:L33075.1
200792_at	1486.2	P	0.000244	gb:NM_001469.1 /DEF=Homo sapiens thyroid autoantigen 70kD (Ku antigen) (G22P1), mRNA. /FEA=mRNA /GEN=G22P1 /PROD=thyroid autoantigen 70kD (Ku antigen) /DB_XREF=gi:4503840 /UG=Hs.197345 thyroid autoantigen 70kD (Ku antigen) /FL=gb:J04611.1 gb:M32865.1 gb:J04607.1 gb:NM_001469.1
200793_s_at	174.8	P	0.008057	gb:NM_001098.1 /DEF=Homo sapiens aconitase 2, mitochondrial (ACO2), nuclear gene encoding mitochondrial protein, mRNA. /FEA=mRNA /GEN=ACO2 /PROD=aconitase 2 /DB_XREF=gi:4501866 /UG=Hs.300463 aconitase 2, mitochondrial /FL=gb:U80040.1 gb:NM_001098.1
200794_x_at	6193.5	P	0.000244	gb:NM_014764.1 /DEF=Homo sapiens DAZ associated protein 2 (DAZAP2), mRNA. /FEA=mRNA /GEN=DAZAP2 /PROD=DAZ associated protein 2 /DB_XREF=gi:7661885 /UG=Hs.75416 DAZ associated protein 2 /FL=gb:BC002334.1 gb:D31767.1 gb:NM_014764.1
200795_at	2.5	A	0.500000	gb:NM_004684.1 /DEF=Homo sapiens SPARC-like 1 (mast9, hevin) (SPARCL1), mRNA. /FEA=mRNA /GEN=SPARCL1 /PROD=SPARC-like 1 /DB_XREF=gi:4758521 /UG=Hs.75445 SPARC-like 1 (mast9, hevin) /FL=gb:NM_004684.1
200796_s_at	72.9	P	0.008057	Consensus includes gb:BF594446 /FEA=EST /DB_XREF=gi:11686770 /DB_XREF=est:7i06c12.x1 /CLONE=IMAGE:3324694 /UG=Hs.86386 myeloid cell leukemia sequence 1 (BCL2-related) /FL=gb:NM_021960.1 gb:AF118124.1
200797_s_at	4650.1	P	0.000244	Consensus includes gb:AI275690 /FEA=EST /DB_XREF=gi:3897964 /DB_XREF=est:qw03a03.x1 /CLONE=IMAGE:1989964 /UG=Hs.86386 myeloid cell leukemia sequence 1 (BCL2-related) /FL=gb:NM_021960.1 gb:AF118124.1
200798_x_at	1247.8	P	0.000244	gb:NM_021960.1 /DEF=Homo sapiens myeloid cell leukemia sequence 1 (BCL2-related) (MCL1), mRNA. /FEA=mRNA /GEN=MCL1 /PROD=myeloid cell leukemia sequence 1 (BCL2-related) /DB_XREF=gi:11386164 /UG=Hs.86386 myeloid cell leukemia sequence 1 (BCL2-related) /FL=gb:NM_021960.1 gb:AF118124.1
200799_at	6254.9	P	0.000244	gb:NM_005345.3 /DEF=Homo sapiens heat shock 70kD protein 1A (HSPA1A), mRNA. /FEA=mRNA /GEN=HSPA1A /PROD=heat shock 70kD protein 1A /DB_XREF=gi:5579469 /UG=Hs.8997 heat shock 70kD protein 1A /FL=gb:BC002453.1 gb:NM_005345.3
200800_s_at	2274.2	P	0.000244	gb:NM_005345.3 /DEF=Homo sapiens heat shock 70kD protein 1A (HSPA1A), mRNA. /FEA=mRNA /GEN=HSPA1A /PROD=heat shock 70kD protein 1A /DB_XREF=gi:5579469 /UG=Hs.8997 heat shock 70kD protein 1A /FL=gb:BC002453.1 gb:NM_005345.3
200801_x_at	12955.7	P	0.000244	gb:NM_001101.2 /DEF=Homo sapiens actin, beta (ACTB), mRNA. /FEA=mRNA /GEN=ACTB /PROD=beta actin /DB_XREF=gi:5016088 /UG=Hs.288061 actin, beta /FL=gb:BC001301.1 gb:BC002409.1 gb:BC004251.1 gb:NM_001101.2
200802_at	1467.3	P	0.000244	gb:NM_006513.1 /DEF=Homo sapiens seryl-tRNA synthetase (SARS), mRNA. /FEA=mRNA /GEN=SARS /PROD=seryl-tRNA synthetase /DB_XREF=gi:5730028 /UG=Hs.4888 seryl-tRNA synthetase /FL=gb:BC000716.1 gb:NM_006513.1 gb:D49914.1
200803_s_at	5441.1	P	0.000244	gb:AF033095.1 /DEF=Homo sapiens testis enhanced gene transcript protein (TEGT) mRNA, complete cds. /FEA=mRNA /GEN=TEGT /PROD=testis enhanced gene transcript protein /DB_XREF=gi:2645728 /UG=Hs.74637 testis enhanced gene transcript (BAX inhibitor 1) /FL=gb:BC000916.1 gb:AF033095.1 gb:NM_003217.1
200804_at	4688.6	P	0.000244	gb:NM_003217.1 /DEF=Homo sapiens testis enhanced gene transcript (TEGT), mRNA. /FEA=mRNA /GEN=TEGT /PROD=testis enhanced gene transcript /DB_XREF=gi:4507432 /UG=Hs.74637 testis enhanced gene transcript (BAX inhibitor 1) /FL=gb:BC000916.1 gb:AF033095.1 gb:NM_003217.1
200805_at	1003.4	P	0.000244	gb:NM_006816.1 /DEF=Homo sapiens endoplasmic reticulum glycoprotein (GP36B), mRNA. /FEA=mRNA /GEN=GP36B /PROD=endoplasmic reticulum glycoprotein /DB_XREF=gi:5803022 /UG=Hs.75864 endoplasmic reticulum glycoprotein /FL=gb:U10362.1 gb:NM_006816.1
200806_s_at	3725.6	P	0.000244	Consensus includes gb:BE256479 /FEA=EST /DB_XREF=gi:9126938 /DB_XREF=est:601111293F1 /CLONE=IMAGE:3352031 /UG=Hs.79037 heat shock 60kD protein 1 (chaperonin) /FL=gb:BC002676.1 gb:BC003030.1 gb:M34664.1 gb:M22382.1 gb:NM_002156.1
200807_s_at	8705.2	P	0.000244	gb:NM_002156.1 /DEF=Homo sapiens heat shock 60kD protein 1 (chaperonin) (HSPD1), mRNA. /FEA=mRNA /GEN=HSPD1 /PROD=heat shock 60kD protein 1 (chaperonin) /DB_XREF=gi:4504520 /UG=Hs.79037 heat shock 60kD protein 1 (chaperonin) /FL=gb:BC002676.1 gb:BC003030.1 gb:M34664.1 gb:M22382.1 gb:NM_002156.1
200808_s_at	89.2	P	0.002930	gb:NM_003461.1 /DEF=Homo sapiens zyxin (ZYX), mRNA. /FEA=mRNA /GEN=ZYX /PROD=zyxin /DB_XREF=gi:4508046 /UG=Hs.75873 zyxin /FL=gb:NM_003461.1
200809_x_at	10770.2	P	0.000244	gb:NM_000976.1 /DEF=Homo sapiens ribosomal protein L12 (RPL12), mRNA. /FEA=mRNA /GEN=RPL12 /PROD=ribosomal protein L12 /DB_XREF=gi:4506596 /UG=Hs.182979 ribosomal protein L12 /FL=gb:L06505.1 gb:NM_000976.1
200810_s_at	2822.9	P	0.000244	gb:NM_001280.1 /DEF=Homo sapiens cold inducible RNA-binding protein (CIRBP), mRNA. /FEA=mRNA /GEN=CIRBP /PROD=cold inducible RNA-binding protein /DB_XREF=gi:4502846 /UG=Hs.119475 cold inducible RNA-binding protein /FL=gb:D78134.1 gb:BC000403.1 gb:BC000901.1 gb:AF021336.1 gb:NM_001280.1
200811_at	1511.1	P	0.000732	gb:NM_001280.1 /DEF=Homo sapiens cold inducible RNA-binding protein (CIRBP), mRNA. /FEA=mRNA /GEN=CIRBP /PROD=cold inducible RNA-binding protein /DB_XREF=gi:4502846 /UG=Hs.119475 cold inducible RNA-binding protein /FL=gb:D78134.1 gb:BC000403.1 gb:BC000901.1 gb:AF021336.1 gb:NM_001280.1
200812_at	2236.8	P	0.000244	gb:NM_006429.1 /DEF=Homo sapiens chaperonin containing TCP1, subunit 7 (eta) (CCT7), mRNA. /FEA=mRNA /GEN=CCT7 /PROD=chaperonin containing TCP1, subunit 7 (eta) /DB_XREF=gi:5453606 /UG=Hs.108809 chaperonin containing TCP1, subunit 7 (eta) /FL=gb:AF026292.1 gb:NM_006429.1
200813_s_at	162.0	P	0.001221	Consensus includes gb:BE256969 /FEA=EST /DB_XREF=gi:9127437 /DB_XREF=est:601112157F1 /CLONE=IMAGE:3352623 /UG=Hs.77318 platelet-activating factor acetylhydrolase, isoform Ib, alpha subunit (45kD) /FL=gb:L13385.1 gb:L13386.1 gb:NM_000430.2
200814_at	4478.3	P	0.000244	gb:NM_006263.1 /DEF=Homo sapiens proteasome (prosome, macropain) activator subunit 1 (PA28 alpha) (PSME1), mRNA. /FEA=mRNA /GEN=PSME1 /PROD=proteasome (prosome, macropain) activatorsubunit 1 (PA28 alpha) /DB_XREF=gi:5453989 /UG=Hs.75348 proteasome (prosome, macropain) activator subunit 1 (PA28 alpha) /FL=gb:BC000352.1 gb:L07633.1 gb:NM_006263.1
200815_s_at	478.2	P	0.000244	gb:L13386.1 /DEF=Homo sapiens (clone 47) Miller-Dieker lissencephaly protein (LIS1) mRNA, complete cds. /FEA=mRNA /GEN=LIS1 /PROD=Miller-Dieker lissencephaly protein /DB_XREF=gi:349825 /UG=Hs.77318 platelet-activating factor acetylhydrolase, isoform Ib, alpha subunit (45kD) /FL=gb:L13385.1 gb:L13386.1 gb:NM_000430.2
200816_s_at	717.2	P	0.000244	gb:NM_000430.2 /DEF=Homo sapiens platelet-activating factor acetylhydrolase, isoform Ib, alpha subunit (45kD) (PAFAH1B1), mRNA. /FEA=mRNA /GEN=PAFAH1B1 /PROD=platelet-activating factor acetylhydrolase,isoform Ib, alpha subunit (45kD) /DB_XREF=gi:6031206 /UG=Hs.77318 platelet-activating factor acetylhydrolase, isoform Ib, alpha subunit (45kD) /FL=gb:L13385.1 gb:L13386.1 gb:NM_000430.2
200817_x_at	16112.4	P	0.000244	gb:NM_001014.1 /DEF=Homo sapiens ribosomal protein S10 (RPS10), mRNA. /FEA=mRNA /GEN=RPS10 /PROD=ribosomal protein S10 /DB_XREF=gi:4506678 /UG=Hs.76230 ribosomal protein S10 /FL=gb:BC001032.1 gb:BC001955.1 gb:BC005012.1 gb:NM_001014.1 gb:U14972.1
200818_at	2703.1	P	0.000244	gb:NM_001697.1 /DEF=Homo sapiens ATP synthase, H+ transporting, mitochondrial F1 complex, O subunit (oligomycin sensitivity conferring protein) (ATP5O), mRNA. /FEA=mRNA /GEN=ATP5O /PROD=ATP synthase, H+ transporting, mitochondrial F1complex, O subunit (oligomycin sensitivity conferringprotein) /DB_XREF=gi:4502302 /UG=Hs.76572 ATP synthase, H+ transporting, mitochondrial F1 complex, O subunit (oli…
200819_s_at	8235.0	P	0.000244	gb:NM_001018.1 /DEF=Homo sapiens ribosomal protein S15 (RPS15), mRNA. /FEA=mRNA /GEN=RPS15 /PROD=ribosomal protein S15 /DB_XREF=gi:4506686 /UG=Hs.133230 ribosomal protein S15 /FL=gb:J02984.1 gb:NM_001018.1
200820_at	1836.9	P	0.000244	gb:NM_002812.1 /DEF=Homo sapiens proteasome (prosome, macropain) 26S subunit, non-ATPase, 8 (PSMD8), mRNA. /FEA=mRNA /GEN=PSMD8 /PROD=proteasome (prosome, macropain) 26S subunit,non-ATPase, 8 /DB_XREF=gi:4506232 /UG=Hs.78466 proteasome (prosome, macropain) 26S subunit, non-ATPase, 8 /FL=gb:D38047.1 gb:BC001164.1 gb:NM_002812.1
200821_at	1096.0	P	0.000732	gb:NM_013995.1 /DEF=Homo sapiens lysosomal-associated membrane protein 2 (LAMP2), transcript variant LAMP2B, mRNA. /FEA=mRNA /GEN=LAMP2 /PROD=lysosomal-associated membrane protein 2precursor /DB_XREF=gi:7669502 /UG=Hs.8262 lysosomal-associated membrane protein 2 /FL=gb:U36336.1 gb:BC002965.1 gb:NM_013995.1
200822_x_at	3979.0	P	0.000244	gb:NM_000365.1 /DEF=Homo sapiens triosephosphate isomerase 1 (TPI1), mRNA. /FEA=mRNA /GEN=TPI1 /PROD=triosephosphate isomerase 1 /DB_XREF=gi:4507644 /UG=Hs.83848 triosephosphate isomerase 1 /FL=gb:BC004230.1 gb:NM_000365.1
200823_x_at	5965.0	P	0.000244	gb:NM_000992.1 /DEF=Homo sapiens ribosomal protein L29 (RPL29), mRNA. /FEA=mRNA /GEN=RPL29 /PROD=ribosomal protein L29 /DB_XREF=gi:4506628 /UG=Hs.183698 ribosomal protein L29 /FL=gb:U49083.1 gb:NM_000992.1 gb:U10248.1
200824_at	30.4	P	0.037598	gb:NM_000852.2 /DEF=Homo sapiens glutathione S-transferase pi (GSTP1), mRNA. /FEA=mRNA /GEN=GSTP1 /PROD=glutathione transferase /DB_XREF=gi:6552334 /UG=Hs.226795 glutathione S-transferase pi /FL=gb:U62589.1 gb:U30897.1 gb:NM_000852.2
200825_s_at	429.9	P	0.000244	gb:NM_006389.2 /DEF=Homo sapiens oxygen regulated protein (150kD) (ORP150), mRNA. /FEA=mRNA /GEN=ORP150 /PROD=oxygen regulated protein precursor /DB_XREF=gi:13699861 /UG=Hs.277704 oxygen regulated protein (150kD) /FL=gb:NM_006389.2 gb:U65785.1
200826_at	4486.3	P	0.000244	gb:NM_004597.3 /DEF=Homo sapiens small nuclear ribonucleoprotein D2 polypeptide (16.5kD) (SNRPD2), mRNA. /FEA=mRNA /GEN=SNRPD2 /PROD=small nuclear ribonucleoprotein D2 polypeptide(16.5kD) /DB_XREF=gi:7242206 /UG=Hs.53125 small nuclear ribonucleoprotein D2 polypeptide (16.5kD) /FL=gb:BC000486.1 gb:BC001930.1 gb:U15008.1 gb:NM_004597.3
200827_at	107.8	P	0.004150	gb:NM_000302.1 /DEF=Homo sapiens procollagen-lysine, 2-oxoglutarate 5-dioxygenase (lysine hydroxylase, Ehlers-Danlos syndrome type VI) (PLOD), mRNA. /FEA=mRNA /GEN=PLOD /PROD=procollagen-lysine 5-dioxygenase /DB_XREF=gi:4557836 /UG=Hs.75093 procollagen-lysine, 2-oxoglutarate 5-dioxygenase (lysine hydroxylase, Ehlers-Danlos syndrome type VI) /FL=gb:L06419.1 gb:NM_000302.1
200828_s_at	1527.6	P	0.000244	Consensus includes gb:BE871379 /FEA=EST /DB_XREF=gi:10320155 /DB_XREF=est:601449306F1 /CLONE=IMAGE:3853200 /UG=Hs.62112 zinc finger protein 207 /FL=gb:AF046001.1 gb:NM_003457.1
200829_x_at	1278.0	P	0.000244	gb:NM_003457.1 /DEF=Homo sapiens zinc finger protein 207 (ZNF207), mRNA. /FEA=mRNA /GEN=ZNF207 /PROD=zinc finger protein 207 /DB_XREF=gi:4508016 /UG=Hs.62112 zinc finger protein 207 /FL=gb:AF046001.1 gb:NM_003457.1
200830_at	1610.2	P	0.000244	gb:NM_002808.1 /DEF=Homo sapiens proteasome (prosome, macropain) 26S subunit, non-ATPase, 2 (PSMD2), mRNA. /FEA=mRNA /GEN=PSMD2 /PROD=proteasome (prosome, macropain) 26S subunit,non-ATPase, 2 /DB_XREF=gi:4506226 /UG=Hs.74619 proteasome (prosome, macropain) 26S subunit, non-ATPase, 2 /FL=gb:D78151.1 gb:BC002368.1 gb:BC002997.1 gb:NM_002808.1 gb:U18247.1 gb:U12596.1
200831_s_at	129.9	P	0.005859	Consensus includes gb:AA678241 /FEA=EST /DB_XREF=gi:2658763 /DB_XREF=est:zi27a06.s1 /CLONE=IMAGE:431986 /UG=Hs.119597 stearoyl-CoA desaturase (delta-9-desaturase) /FL=gb:AF097514.1 gb:NM_005063.1 gb:AB032261.1
200832_s_at	909.5	P	0.000244	gb:AB032261.1 /DEF=Homo sapiens Scd mRNA for stearoyl-CoA desaturase, complete cds. /FEA=mRNA /GEN=Scd /PROD=stearoyl-CoA desaturase /DB_XREF=gi:7415720 /UG=Hs.119597 stearoyl-CoA desaturase (delta-9-desaturase) /FL=gb:AF097514.1 gb:NM_005063.1 gb:AB032261.1
200833_s_at	2494.4	P	0.000244	gb:NM_015646.1 /DEF=Homo sapiens RAP1B, member of RAS oncogene family (RAP1B), mRNA. /FEA=mRNA /GEN=RAP1B /PROD=DKFZP586H0723 protein /DB_XREF=gi:7661677 /UG=Hs.156764 RAP1B, member of RAS oncogene family /FL=gb:BC000176.2 gb:NM_015646.1
200834_s_at	13991.0	P	0.000244	gb:NM_001024.1 /DEF=Homo sapiens ribosomal protein S21 (RPS21), mRNA. /FEA=mRNA /GEN=RPS21 /PROD=ribosomal protein S21 /DB_XREF=gi:4506698 /UG=Hs.1948 ribosomal protein S21 /FL=gb:L04483.1 gb:NM_001024.1
200835_s_at	138.9	P	0.018555	Consensus includes gb:AI553791 /FEA=EST /DB_XREF=gi:4486154 /DB_XREF=est:tn29a04.x1 /CLONE=IMAGE:2169006 /UG=Hs.239298 microtubule-associated protein 4 /FL=gb:M64571.1 gb:NM_002375.1 gb:U19727.1
200836_s_at	167.4	M	0.056152	gb:NM_002375.1 /DEF=Homo sapiens microtubule-associated protein 4 (MAP4), mRNA. /FEA=mRNA /GEN=MAP4 /PROD=microtubule-associated protein 4 /DB_XREF=gi:4505098 /UG=Hs.239298 microtubule-associated protein 4 /FL=gb:M64571.1 gb:NM_002375.1 gb:U19727.1
200837_at	3272.1	P	0.000244	gb:NM_005745.3 /DEF=Homo sapiens accessory proteins BAP31BAP29 (DXS1357E), mRNA. /FEA=mRNA /GEN=DXS1357E /PROD=accessory proteins BAP31BAP29 /DB_XREF=gi:10047078 /UG=Hs.291904 accessory proteins BAP31BAP29 /FL=gb:NM_005745.3
200838_at	562.2	P	0.000244	gb:NM_001908.1 /DEF=Homo sapiens cathepsin B (CTSB), mRNA. /FEA=mRNA /GEN=CTSB /PROD=cathepsin B /DB_XREF=gi:4503138 /UG=Hs.297939 cathepsin B /FL=gb:M14221.1 gb:L16510.1 gb:NM_001908.1
200839_s_at	770.5	P	0.000244	gb:NM_001908.1 /DEF=Homo sapiens cathepsin B (CTSB), mRNA. /FEA=mRNA /GEN=CTSB /PROD=cathepsin B /DB_XREF=gi:4503138 /UG=Hs.297939 cathepsin B /FL=gb:M14221.1 gb:L16510.1 gb:NM_001908.1
200840_at	5959.5	P	0.000244	gb:NM_005548.1 /DEF=Homo sapiens lysyl-tRNA synthetase (KARS), mRNA. /FEA=mRNA /GEN=KARS /PROD=lysyl-tRNA synthetase /DB_XREF=gi:5031814 /UG=Hs.3100 lysyl-tRNA synthetase /FL=gb:BC004132.1 gb:D32053.1 gb:NM_005548.1
200841_s_at	73.3	P	0.000244	Consensus includes gb:AI142677 /FEA=EST /DB_XREF=gi:3659036 /DB_XREF=est:ok33h03.s1 /CLONE=IMAGE:1509653 /UG=Hs.55921 glutamyl-prolyl-tRNA synthetase /FL=gb:NM_004446.1
200842_s_at	1049.0	P	0.000244	Consensus includes gb:AI475965 /FEA=EST /DB_XREF=gi:4329010 /DB_XREF=est:tl96a09.x1 /CLONE=IMAGE:2154904 /UG=Hs.55921 glutamyl-prolyl-tRNA synthetase /FL=gb:NM_004446.1
200843_s_at	716.8	P	0.000244	gb:NM_004446.1 /DEF=Homo sapiens glutamyl-prolyl-tRNA synthetase (EPRS), mRNA. /FEA=mRNA /GEN=EPRS /PROD=glutamyl-prolyl tRNA synthetase /DB_XREF=gi:4758293 /UG=Hs.55921 glutamyl-prolyl-tRNA synthetase /FL=gb:NM_004446.1
200844_s_at	3541.1	P	0.000244	Consensus includes gb:BE869583 /FEA=EST /DB_XREF=gi:10318463 /DB_XREF=est:601445695F1 /CLONE=IMAGE:3849815 /UG=Hs.120 anti-oxidant protein 2 (non-selenium glutathione peroxidase, acidic calcium-independent phospholipase A2) /FL=gb:D14662.1 gb:NM_004905.1
200845_s_at	3095.2	P	0.000244	gb:NM_004905.1 /DEF=Homo sapiens anti-oxidant protein 2 (non-selenium glutathione peroxidase, acidic calcium-independent phospholipase A2) (KIAA0106), mRNA. /FEA=mRNA /GEN=KIAA0106 /PROD=anti-oxidant protein 2 (non-selenium glutathioneperoxidase, acidic calcium-independent phospholipase A2) /DB_XREF=gi:4758637 /UG=Hs.120 anti-oxidant protein 2 (non-selenium glutathione peroxidase, acidic calcium-…
200846_s_at	3079.5	P	0.000244	gb:NM_002708.1 /DEF=Homo sapiens protein phosphatase 1, catalytic subunit, alpha isoform (PPP1CA), mRNA. /FEA=mRNA /GEN=PPP1CA /PROD=protein phosphatase 1, catalytic subunit, alphaisoform /DB_XREF=gi:4506002 /UG=Hs.183994 protein phosphatase 1, catalytic subunit, alpha isoform /FL=gb:BC001888.1 gb:BC004482.1 gb:M63960.1 gb:NM_002708.1
200847_s_at	2098.1	P	0.000244	gb:NM_016127.1 /DEF=Homo sapiens HSPC035 protein (LOC51669), mRNA. /FEA=mRNA /GEN=LOC51669 /PROD=HSPC035 protein /DB_XREF=gi:7706384 /UG=Hs.279921 HSPC035 protein /FL=gb:AF100748.1 gb:AF078855.1 gb:NM_016127.1
200848_at	840.9	P	0.000244	Consensus includes gb:AA479488 /FEA=EST /DB_XREF=gi:2208044 /DB_XREF=est:zv21c09.s1 /CLONE=IMAGE:754288 /UG=Hs.4113 S-adenosylhomocysteine hydrolase-like 1 /FL=gb:U82761.1 gb:NM_006621.1
200849_s_at	1199.4	P	0.000244	Consensus includes gb:AI589266 /FEA=EST /DB_XREF=gi:4598314 /DB_XREF=est:tr58c06.x2 /CLONE=IMAGE:2222506 /UG=Hs.4113 S-adenosylhomocysteine hydrolase-like 1 /FL=gb:U82761.1 gb:NM_006621.1
200850_s_at	1690.2	P	0.000244	gb:NM_006621.1 /DEF=Homo sapiens S-adenosylhomocysteine hydrolase-like 1 (AHCYL1), mRNA. /FEA=mRNA /GEN=AHCYL1 /PROD=S-adenosylhomocysteine hydrolase-like 1 /DB_XREF=gi:5729723 /UG=Hs.4113 S-adenosylhomocysteine hydrolase-like 1 /FL=gb:U82761.1 gb:NM_006621.1
200851_s_at	2293.1	P	0.000244	gb:NM_014761.1 /DEF=Homo sapiens KIAA0174 gene product (KIAA0174), mRNA. /FEA=mRNA /GEN=KIAA0174 /PROD=KIAA0174 gene product /DB_XREF=gi:7661971 /UG=Hs.75824 KIAA0174 gene product /FL=gb:D79996.1 gb:BC000430.1 gb:BC004359.1 gb:NM_014761.1
200852_x_at	1581.1	P	0.002930	gb:NM_005273.1 /DEF=Homo sapiens guanine nucleotide binding protein (G protein), beta polypeptide 2 (GNB2), mRNA. /FEA=mRNA /GEN=GNB2 /PROD=guanine nucleotide binding protein (G protein),beta polypeptide 2 /DB_XREF=gi:4885282 /UG=Hs.91299 guanine nucleotide binding protein (G protein), beta polypeptide 2 /FL=gb:M16538.1 gb:M36429.1 gb:NM_005273.1
200853_at	5964.2	P	0.000244	gb:NM_002106.1 /DEF=Homo sapiens H2A histone family, member Z (H2AFZ), mRNA. /FEA=mRNA /GEN=H2AFZ /PROD=H2A histone family, member Z /DB_XREF=gi:4504254 /UG=Hs.119192 H2A histone family, member Z /FL=gb:M37583.1 gb:NM_002106.1
200854_at	419.8	P	0.000244	Consensus includes gb:AB028970.1 /DEF=Homo sapiens mRNA for KIAA1047 protein, partial cds. /FEA=mRNA /GEN=KIAA1047 /PROD=KIAA1047 protein /DB_XREF=gi:5689430 /UG=Hs.144904 nuclear receptor co-repressor 1 /FL=gb:AF044209.1 gb:NM_006311.1
200855_at	95.2	P	0.005859	Consensus includes gb:AW771910 /FEA=EST /DB_XREF=gi:7703971 /DB_XREF=est:hn66c11.x1 /CLONE=IMAGE:3032852 /UG=Hs.144904 nuclear receptor co-repressor 1 /FL=gb:AF044209.1 gb:NM_006311.1
200856_x_at	115.6	P	0.000244	Consensus includes gb:BF437948 /FEA=EST /DB_XREF=gi:11450465 /DB_XREF=est:7q63b10.x1 /CLONE=IMAGE:3702882 /UG=Hs.144904 nuclear receptor co-repressor 1 /FL=gb:AF044209.1 gb:NM_006311.1
200857_s_at	255.5	P	0.008057	gb:NM_006311.1 /DEF=Homo sapiens nuclear receptor co-repressor 1 (NCOR1), mRNA. /FEA=mRNA /GEN=NCOR1 /PROD=nuclear receptor co-repressor 1 /DB_XREF=gi:5454137 /UG=Hs.144904 nuclear receptor co-repressor 1 /FL=gb:AF044209.1 gb:NM_006311.1
200858_s_at	9139.6	P	0.000244	gb:NM_001012.1 /DEF=Homo sapiens ribosomal protein S8 (RPS8), mRNA. /FEA=mRNA /GEN=RPS8 /PROD=ribosomal protein S8 /DB_XREF=gi:4506742 /UG=Hs.151604 ribosomal protein S8 /FL=gb:NM_001012.1
200859_x_at	440.7	P	0.001953	gb:NM_001456.1 /DEF=Homo sapiens filamin A, alpha (actin-binding protein-280) (FLNA), mRNA. /FEA=mRNA /GEN=FLNA /PROD=filamin 1 (actin-binding protein-280) /DB_XREF=gi:4503744 /UG=Hs.195464 filamin A, alpha (actin-binding protein-280) /FL=gb:NM_001456.1
200860_s_at	1006.9	P	0.000244	gb:BC000779.1 /DEF=Homo sapiens, Similar to KIAA1007 protein, clone MGC:692, mRNA, complete cds. /FEA=mRNA /PROD=Similar to KIAA1007 protein /DB_XREF=gi:12653966 /UG=Hs.279949 KIAA1007 protein /FL=gb:BC000779.1 gb:AF110778.1 gb:NM_016284.1
200861_at	63.1	P	0.000732	gb:NM_016284.1 /DEF=Homo sapiens KIAA1007 protein (KIAA1007), mRNA. /FEA=mRNA /GEN=KIAA1007 /PROD=KIAA1007 protein /DB_XREF=gi:7706213 /UG=Hs.279949 KIAA1007 protein /FL=gb:BC000779.1 gb:AF110778.1 gb:NM_016284.1
200862_at	948.0	P	0.000244	gb:NM_014762.1 /DEF=Homo sapiens seladin-1 (KIAA0018), mRNA. /FEA=mRNA /GEN=KIAA0018 /PROD=seladin-1 /DB_XREF=gi:13375617 /UG=Hs.75616 seladin-1 /FL=gb:AF261758.1 gb:BC004375.1 gb:NM_014762.1
200863_s_at	3677.4	P	0.000244	Consensus includes gb:AI215102 /FEA=EST /DB_XREF=gi:3778703 /DB_XREF=est:qg69g05.x1 /CLONE=IMAGE:1840472 /UG=Hs.75618 RAB11A, member RAS oncogene family /FL=gb:AF000231.1 gb:NM_004663.1
200864_s_at	536.8	P	0.000244	gb:NM_004663.1 /DEF=Homo sapiens RAB11A, member RAS oncogene family (RAB11A), mRNA. /FEA=mRNA /GEN=RAB11A /PROD=RAB11A, member RAS oncogene family /DB_XREF=gi:4758983 /UG=Hs.75618 RAB11A, member RAS oncogene family /FL=gb:AF000231.1 gb:NM_004663.1
200865_at	1.1	A	0.805420	Consensus includes gb:AI001896 /FEA=EST /DB_XREF=gi:3202367 /DB_XREF=est:ot42a05.s1 /CLONE=IMAGE:1619408 /UG=Hs.7811 eukaryotic translation initiation factor 3, subunit 5 (epsilon, 47kD) /FL=gb:BC000490.1 gb:U94855.1 gb:NM_003754.1
200866_s_at	492.1	P	0.000732	gb:M32221.1 /DEF=Human saposin proteins A-D mRNA, complete cds. /FEA=mRNA /GEN=PSAP /DB_XREF=gi:337761 /UG=Hs.78575 prosaposin (variant Gaucher disease and variant metachromatic leukodystrophy) /FL=gb:NM_002778.1 gb:BC004275.1 gb:J03077.1 gb:D00422.1 gb:M60255.1 gb:M32221.1 gb:M60257.1 gb:M60258.1 gb:M81355.1
200867_at	1113.8	P	0.000244	Consensus includes gb:AL031685 /DEF=Human DNA sequence from clone RP5-963K23 on chromosome 20q13.11-13.2 Contains a KRT18 (Keratin type I, Cytoskeletal 18 (Cytokeratin 18, CK18,CYK18)) pseudogene, a gene for a novel protein, the gene for spermatogenesis associated protein PD1 (KIAA0... /FEA=mRNA_2 /DB_XREF=gi:9368423 /UG=Hs.10590 zinc finger protein 313 /FL=gb:AF265215.1 gb:NM_018683.1
200868_s_at	2032.7	P	0.000244	gb:NM_018683.1 /DEF=Homo sapiens zinc finger protein 313 (ZNF313), mRNA. /FEA=mRNA /GEN=ZNF313 /PROD=zinc finger protein 313 /DB_XREF=gi:8923897 /UG=Hs.10590 zinc finger protein 313 /FL=gb:AF265215.1 gb:NM_018683.1
200869_at	9981.2	P	0.000244	gb:NM_000980.1 /DEF=Homo sapiens ribosomal protein L18a (RPL18A), mRNA. /FEA=mRNA /GEN=RPL18A /PROD=ribosomal protein L18a /DB_XREF=gi:11415025 /UG=Hs.163593 ribosomal protein L18a /FL=gb:NM_000980.1 gb:L05093.1
200870_at	2427.8	P	0.000244	gb:NM_007178.1 /DEF=Homo sapiens unr-interacting protein (UNRIP), mRNA. /FEA=mRNA /GEN=UNRIP /PROD=unr-interacting protein /DB_XREF=gi:6005931 /UG=Hs.3727 unr-interacting protein /FL=gb:BC000162.1 gb:AB024327.1 gb:NM_007178.1 gb:AL136691.1 gb:AF161496.1
200871_s_at	3500.6	P	0.000244	gb:NM_002778.1 /DEF=Homo sapiens prosaposin (variant Gaucher disease and variant metachromatic leukodystrophy) (PSAP), mRNA. /FEA=mRNA /GEN=PSAP /PROD=prosaposin (variant Gaucher disease and variantmetachromatic leukodystrophy) /DB_XREF=gi:11386146 /UG=Hs.78575 prosaposin (variant Gaucher disease and variant metachromatic leukodystrophy) /FL=gb:NM_002778.1 gb:BC004275.1 gb:J03077.1 gb:D00422.1 gb…
200872_at	6405.4	P	0.000244	gb:NM_002966.1 /DEF=Homo sapiens S100 calcium-binding protein A10 (annexin II ligand, calpactin I, light polypeptide (p11)) (S100A10), mRNA. /FEA=mRNA /GEN=S100A10 /PROD=S100 calcium-binding protein A10 /DB_XREF=gi:4506760 /UG=Hs.119301 S100 calcium-binding protein A10 (annexin II ligand, calpactin I, light polypeptide (p11)) /FL=gb:M81457.1 gb:M38591.1 gb:NM_002966.1
200873_s_at	2747.4	P	0.000244	gb:NM_006585.1 /DEF=Homo sapiens chaperonin containing TCP1, subunit 8 (theta) (CCT8), mRNA. /FEA=mRNA /GEN=CCT8 /PROD=chaperonin containing TCP1, subunit 8 (theta) /DB_XREF=gi:6005726 /UG=Hs.15071 chaperonin containing TCP1, subunit 8 (theta) /FL=gb:D13627.1 gb:NM_006585.1
200874_s_at	248.5	P	0.000244	Consensus includes gb:BE796327 /FEA=EST /DB_XREF=gi:10217525 /DB_XREF=est:601591928F1 /CLONE=IMAGE:3946015 /UG=Hs.296585 nucleolar protein (KKED repeat) /FL=gb:NM_006392.1
200875_s_at	1064.7	P	0.000244	gb:NM_006392.1 /DEF=Homo sapiens nucleolar protein (KKED repeat) (NOP56), mRNA. /FEA=mRNA /GEN=NOP56 /PROD=nucleolar protein (KKED repeat) /DB_XREF=gi:5453793 /UG=Hs.296585 nucleolar protein (KKED repeat) /FL=gb:NM_006392.1
200876_s_at	5906.3	P	0.000732	gb:NM_002793.1 /DEF=Homo sapiens proteasome (prosome, macropain) subunit, beta type, 1 (PSMB1), mRNA. /FEA=mRNA /GEN=PSMB1 /PROD=proteasome (prosome, macropain) subunit, betatype, 1 /DB_XREF=gi:4506192 /UG=Hs.75748 proteasome (prosome, macropain) subunit, beta type, 1 /FL=gb:BC000508.1 gb:NM_002793.1
200877_at	3743.8	P	0.000244	gb:NM_006430.1 /DEF=Homo sapiens chaperonin containing TCP1, subunit 4 (delta) (CCT4), mRNA. /FEA=mRNA /GEN=CCT4 /PROD=chaperonin containing TCP1, subunit 4 (delta) /DB_XREF=gi:5453604 /UG=Hs.79150 chaperonin containing TCP1, subunit 4 (delta) /FL=gb:U38846.1 gb:AF026291.1 gb:NM_006430.1
200878_at	2627.7	P	0.000244	Consensus includes gb:AF052094.1 /DEF=Homo sapiens clone 23698 mRNA sequence. /FEA=mRNA /DB_XREF=gi:3360400 /UG=Hs.8136 endothelial PAS domain protein 1 /FL=gb:U51626.1 gb:U81984.1 gb:NM_001430.1
200879_s_at	9.3	A	0.303711	gb:NM_001430.1 /DEF=Homo sapiens endothelial PAS domain protein 1 (EPAS1), mRNA. /FEA=mRNA /GEN=EPAS1 /PROD=endothelial PAS domain protein 1 /DB_XREF=gi:4503576 /UG=Hs.8136 endothelial PAS domain protein 1 /FL=gb:U51626.1 gb:U81984.1 gb:NM_001430.1
200880_at	1307.8	P	0.000244	Consensus includes gb:AL534104 /FEA=EST /DB_XREF=gi:12797597 /DB_XREF=est:AL534104 /CLONE=CS0DF005YF01 (3 prime) /UG=Hs.94 DnaJ (Hsp40) homolog, subfamily A, member 1 /FL=gb:D13388.1 gb:L08069.1 gb:NM_001539.1
200881_s_at	4398.2	P	0.000244	gb:NM_001539.1 /DEF=Homo sapiens heat shock protein, DNAJ-like 2 (HSJ2), mRNA. /FEA=mRNA /GEN=HSJ2 /PROD=heat shock protein, DNAJ-like 2 /DB_XREF=gi:4504510 /UG=Hs.94 DnaJ (Hsp40) homolog, subfamily A, member 1 /FL=gb:D13388.1 gb:L08069.1 gb:NM_001539.1
200882_s_at	3927.4	P	0.000244	gb:NM_002810.1 /DEF=Homo sapiens proteasome (prosome, macropain) 26S subunit, non-ATPase, 4 (PSMD4), mRNA. /FEA=mRNA /GEN=PSMD4 /PROD=proteasome (prosome, macropain) 26S subunit,non-ATPase, 4 /DB_XREF=gi:5292160 /UG=Hs.148495 proteasome (prosome, macropain) 26S subunit, non-ATPase, 4 /FL=gb:BC002365.1 gb:U24704.1 gb:NM_002810.1
200883_at	1657.8	P	0.000244	gb:NM_003366.1 /DEF=Homo sapiens ubiquinol-cytochrome c reductase core protein II (UQCRC2), mRNA. /FEA=mRNA /GEN=UQCRC2 /PROD=ubiquinol-cytochrome c reductase core proteinII /DB_XREF=gi:4507842 /UG=Hs.173554 ubiquinol-cytochrome c reductase core protein II /FL=gb:BC000484.1 gb:BC003136.1 gb:J04973.1 gb:NM_003366.1
200884_at	377.1	P	0.002930	gb:NM_001823.1 /DEF=Homo sapiens creatine kinase, brain (CKB), mRNA. /FEA=mRNA /GEN=CKB /PROD=creatine kinase, brain /DB_XREF=gi:4502850 /UG=Hs.173724 creatine kinase, brain /FL=gb:L47647.1 gb:BC001190.1 gb:BC004914.1 gb:M16364.1 gb:M16451.1 gb:NM_001823.1
200885_at	1530.9	P	0.000732	gb:NM_005167.1 /DEF=Homo sapiens ras homolog gene family, member C (ARHC), mRNA. /FEA=mRNA /GEN=ARHC /PROD=ras homolog gene family, member C /DB_XREF=gi:4885066 /UG=Hs.179735 ras homolog gene family, member C /FL=gb:L25081.1 gb:NM_005167.1
200886_s_at	5288.1	P	0.000244	gb:NM_002629.1 /DEF=Homo sapiens phosphoglycerate mutase 1 (brain) (PGAM1), mRNA. /FEA=mRNA /GEN=PGAM1 /PROD=phosphoglycerate mutase 1 (brain) /DB_XREF=gi:4505752 /UG=Hs.181013 phosphoglycerate mutase 1 (brain) /FL=gb:BC000455.1 gb:NM_002629.1 gb:J04173.1
200887_s_at	4735.0	P	0.000244	gb:NM_007315.1 /DEF=Homo sapiens signal transducer and activator of transcription 1, 91kD (STAT1), mRNA. /FEA=mRNA /GEN=STAT1 /PROD=signal transducer and activator of transcription1, 91kD /DB_XREF=gi:6274551 /UG=Hs.21486 signal transducer and activator of transcription 1, 91kD /FL=gb:M97935.1 gb:NM_007315.1
200888_s_at	4069.7	P	0.000244	gb:NM_000978.1 /DEF=Homo sapiens ribosomal protein L23 (RPL23), mRNA. /FEA=mRNA /GEN=RPL23 /PROD=ribosomal protein L23 /DB_XREF=gi:4506604 /UG=Hs.234518 ribosomal protein L23 /FL=gb:NM_000978.1
200889_s_at	865.4	P	0.000244	Consensus includes gb:AI016620 /FEA=EST /DB_XREF=gi:3230956 /DB_XREF=est:ov30e10.x1 /CLONE=IMAGE:1638858 /UG=Hs.250773 signal sequence receptor, alpha (translocon-associated protein alpha) /FL=gb:AF156965.1 gb:NM_003144.2
200890_s_at	404.6	P	0.000244	Consensus includes gb:AW006345 /FEA=EST /DB_XREF=gi:5855123 /DB_XREF=est:wt04d05.x1 /CLONE=IMAGE:2506473 /UG=Hs.250773 signal sequence receptor, alpha (translocon-associated protein alpha) /FL=gb:AF156965.1 gb:NM_003144.2
200891_s_at	3112.2	P	0.000244	gb:NM_003144.2 /DEF=Homo sapiens signal sequence receptor, alpha (translocon-associated protein alpha) (SSR1), mRNA. /FEA=mRNA /GEN=SSR1 /PROD=signal sequence receptor, alpha /DB_XREF=gi:6552340 /UG=Hs.250773 signal sequence receptor, alpha (translocon-associated protein alpha) /FL=gb:AF156965.1 gb:NM_003144.2
200892_s_at	1606.9	P	0.000244	gb:BC000451.1 /DEF=Homo sapiens, splicing factor, arginineserine-rich (transformer 2 Drosophila homolog) 10, clone MGC:8454, mRNA, complete cds. /FEA=mRNA /PROD=splicing factor, arginineserine-rich(transformer 2 Drosophila homolog) 10 /DB_XREF=gi:12653362 /UG=Hs.30035 splicing factor, arginineserine-rich (transformer 2 Drosophila homolog) 10 /FL=gb:BC000160.1 gb:BC000451.1 gb:U61267.1 gb:U68063.1…
200893_at	3470.9	P	0.000244	gb:NM_004593.1 /DEF=Homo sapiens splicing factor, arginineserine-rich (transformer 2 Drosophila homolog) 10 (SFRS10), mRNA. /FEA=mRNA /GEN=SFRS10 /PROD=splicing factor, arginineserine-rich(transformer 2 Drosophila homolog) 10 /DB_XREF=gi:4759097 /UG=Hs.30035 splicing factor, arginineserine-rich (transformer 2 Drosophila homolog) 10 /FL=gb:BC000160.1 gb:BC000451.1 gb:U61267.1 gb:U68063.1 gb:NM_004…
200894_s_at	383.5	P	0.000732	Consensus includes gb:AA894574 /FEA=EST /DB_XREF=gi:3030975 /DB_XREF=est:of91h10.s1 /CLONE=IMAGE:1437763 /UG=Hs.848 FK506-binding protein 4 (59kD) /FL=gb:BC001786.1 gb:M88279.1 gb:NM_002014.1
200895_s_at	728.6	P	0.001221	gb:NM_002014.1 /DEF=Homo sapiens FK506-binding protein 4 (59kD) (FKBP4), mRNA. /FEA=mRNA /GEN=FKBP4 /PROD=FK506-binding protein 4 (59kD) /DB_XREF=gi:4503728 /UG=Hs.848 FK506-binding protein 4 (59kD) /FL=gb:BC001786.1 gb:M88279.1 gb:NM_002014.1
200896_x_at	3718.4	P	0.000244	gb:NM_004494.1 /DEF=Homo sapiens hepatoma-derived growth factor (high-mobility group protein 1-like) (HDGF), mRNA. /FEA=mRNA /GEN=HDGF /PROD=hepatoma-derived growth factor (high-mobilitygroup protein 1-like) /DB_XREF=gi:4758515 /UG=Hs.89525 hepatoma-derived growth factor (high-mobility group protein 1-like) /FL=gb:NM_004494.1 gb:D16431.1
200897_s_at	1159.7	P	0.000244	gb:NM_016081.1 /DEF=Homo sapiens palladin (KIAA0992), mRNA. /FEA=mRNA /GEN=KIAA0992 /PROD=palladin /DB_XREF=gi:7706354 /UG=Hs.194431 palladin /FL=gb:AF077041.1 gb:AF151909.1 gb:NM_016081.1
200898_s_at	232.7	P	0.000732	Consensus includes gb:AK002091.1 /DEF=Homo sapiens cDNA FLJ11229 fis, clone PLACE1008356, highly similar to Homo sapiens mRNA for KIAA0679 protein. /FEA=mRNA /DB_XREF=gi:7023763 /UG=Hs.5734 meningioma expressed antigen 5 (hyaluronidase) /FL=gb:AF036144.2 gb:NM_012215.1
200899_s_at	676.7	P	0.000244	gb:NM_012215.1 /DEF=Homo sapiens meningioma expressed antigen 5 (hyaluronidase) (MGEA5), mRNA. /FEA=mRNA /GEN=MGEA5 /PROD=meningioma expressed antigen 5 (hyaluronidase) /DB_XREF=gi:11024697 /UG=Hs.5734 meningioma expressed antigen 5 (hyaluronidase) /FL=gb:AF036144.2 gb:NM_012215.1
200900_s_at	783.3	P	0.000244	Consensus includes gb:AI583537 /FEA=EST /DB_XREF=gi:4569434 /DB_XREF=est:ts12d03.x1 /CLONE=IMAGE:2228357 /UG=Hs.75709 mannose-6-phosphate receptor (cation dependent) /FL=gb:NM_002355.2 gb:M16985.1
200901_s_at	628.2	P	0.000244	gb:NM_002355.2 /DEF=Homo sapiens mannose-6-phosphate receptor (cation dependent) (M6PR), mRNA. /FEA=mRNA /GEN=M6PR /PROD=cation-dependent mannose-6-phosphate receptorprecursor /DB_XREF=gi:10947032 /UG=Hs.75709 mannose-6-phosphate receptor (cation dependent) /FL=gb:NM_002355.2 gb:M16985.1
200902_at	1452.3	P	0.000244	gb:NM_004261.1 /DEF=Homo sapiens 15 kDa selenoprotein (SEP15), mRNA. /FEA=mRNA /GEN=SEP15 /PROD=15 kDa selenoprotein /DB_XREF=gi:4759095 /UG=Hs.90606 15 kDa selenoprotein /FL=gb:AF288991.1 gb:BC005294.1 gb:AF051894.1 gb:NM_004261.1
200903_s_at	962.6	P	0.000244	gb:NM_000687.1 /DEF=Homo sapiens S-adenosylhomocysteine hydrolase (AHCY), mRNA. /FEA=mRNA /GEN=AHCY /PROD=S-adenosylhomocysteine hydrolase /DB_XREF=gi:9951914 /UG=Hs.172673 S-adenosylhomocysteine hydrolase /FL=gb:M61832.1 gb:NM_000687.1
200904_at	456.2	P	0.000244	Consensus includes gb:X56841.1 /DEF=H.sapiens HLA-E gene. /FEA=mRNA /GEN=HLA-E /PROD=HLA-E /DB_XREF=gi:433491 /UG=Hs.181392 major histocompatibility complex, class I, E /FL=gb:BC002578.1 gb:NM_005516.1
200905_x_at	3175.6	P	0.000244	gb:NM_005516.1 /DEF=Homo sapiens major histocompatibility complex, class I, E (HLA-E), mRNA. /FEA=mRNA /GEN=HLA-E /PROD=major histocompatibility complex, class I, E /DB_XREF=gi:5031744 /UG=Hs.181392 major histocompatibility complex, class I, E /FL=gb:BC002578.1 gb:NM_005516.1
200906_s_at	407.9	P	0.000244	Consensus includes gb:AK025843.1 /DEF=Homo sapiens cDNA: FLJ22190 fis, clone HRC01053. /FEA=mRNA /DB_XREF=gi:10438481 /UG=Hs.194431 palladin /FL=gb:AF077041.1 gb:AF151909.1 gb:NM_016081.1
200907_s_at	705.6	P	0.000244	Consensus includes gb:AU157932 /FEA=EST /DB_XREF=gi:11019453 /DB_XREF=est:AU157932 /CLONE=PLACE1010217 /UG=Hs.194431 palladin /FL=gb:AF077041.1 gb:AF151909.1 gb:NM_016081.1
200908_s_at	52.6	A	0.246094	Consensus includes gb:BC005354.1 /DEF=Homo sapiens, ribosomal protein, large P2, clone MGC:12453, mRNA, complete cds. /FEA=mRNA /PROD=ribosomal protein, large P2 /DB_XREF=gi:13529169 /UG=Hs.119500 ribosomal protein, large P2 /FL=gb:BC005354.1 gb:M17887.1 gb:NM_001004.1
200909_s_at	7707.8	P	0.000244	gb:NM_001004.1 /DEF=Homo sapiens ribosomal protein, large P2 (RPLP2), mRNA. /FEA=mRNA /GEN=RPLP2 /PROD=ribosomal protein, large P2 /DB_XREF=gi:4506670 /UG=Hs.119500 ribosomal protein, large P2 /FL=gb:BC005354.1 gb:M17887.1 gb:NM_001004.1
200910_at	4082.5	P	0.000244	gb:NM_005998.1 /DEF=Homo sapiens chaperonin containing TCP1, subunit 3 (gamma) (CCT3), mRNA. /FEA=mRNA /GEN=CCT3 /PROD=chaperonin containing TCP1, subunit 3 (gamma) /DB_XREF=gi:5174726 /UG=Hs.1708 chaperonin containing TCP1, subunit 3 (gamma) /FL=gb:NM_005998.1
200911_s_at	443.7	P	0.014160	gb:NM_006283.1 /DEF=Homo sapiens transforming, acidic coiled-coil containing protein 1 (TACC1), mRNA. /FEA=mRNA /GEN=TACC1 /PROD=transforming, acidic coiled-coil containingprotein 1 /DB_XREF=gi:5454099 /UG=Hs.173159 transforming, acidic coiled-coil containing protein 1 /FL=gb:AF049910.1 gb:NM_006283.1
200912_s_at	5753.7	P	0.000244	gb:NM_001967.2 /DEF=Homo sapiens eukaryotic translation initiation factor 4A, isoform 2 (EIF4A2), mRNA. /FEA=mRNA /GEN=EIF4A2 /PROD=eukaryotic translation initiation factor 4A,isoform 2 /DB_XREF=gi:9945313 /UG=Hs.173912 eukaryotic translation initiation factor 4A, isoform 2 /FL=gb:D30655.1 gb:NM_001967.2
200913_at	783.3	P	0.000244	gb:NM_002707.1 /DEF=Homo sapiens protein phosphatase 1G (formerly 2C), magnesium-dependent, gamma isoform (PPM1G), mRNA. /FEA=mRNA /GEN=PPM1G /PROD=protein phosphatase 1G (formerly 2C),magnesium-dependent, gamma isoform /DB_XREF=gi:4505998 /UG=Hs.17883 protein phosphatase 1G (formerly 2C), magnesium-dependent, gamma isoform /FL=gb:BC000057.1 gb:NM_002707.1
200914_x_at	1910.5	P	0.000244	Consensus includes gb:BF589024 /FEA=EST /DB_XREF=gi:11681348 /DB_XREF=est:naa40c08.x1 /CLONE=IMAGE:3258639 /UG=Hs.211577 kinectin 1 (kinesin receptor) /FL=gb:D13629.1 gb:L25616.1 gb:NM_004986.1
200915_x_at	2573.3	P	0.000244	gb:NM_004986.1 /DEF=Homo sapiens kinectin 1 (kinesin receptor) (KTN1), mRNA. /FEA=mRNA /GEN=KTN1 /PROD=kinectin 1 (kinesin receptor) /DB_XREF=gi:4826813 /UG=Hs.211577 kinectin 1 (kinesin receptor) /FL=gb:D13629.1 gb:L25616.1 gb:NM_004986.1
200916_at	1346.9	P	0.000244	gb:NM_003564.1 /DEF=Homo sapiens transgelin 2 (TAGLN2), mRNA. /FEA=mRNA /GEN=TAGLN2 /PROD=transgelin 2 /DB_XREF=gi:4507356 /UG=Hs.75725 transgelin 2 /FL=gb:D21261.1 gb:NM_003564.1
200917_s_at	34.2	A	0.095215	Consensus includes gb:BG474541 /FEA=EST /DB_XREF=gi:13406818 /DB_XREF=est:602517313F1 /CLONE=IMAGE:4649162 /UG=Hs.75730 signal recognition particle receptor (docking protein) /FL=gb:BC001162.1 gb:NM_003139.1
200918_s_at	234.9	P	0.000244	gb:NM_003139.1 /DEF=Homo sapiens signal recognition particle receptor (docking protein) (SRPR), mRNA. /FEA=mRNA /GEN=SRPR /PROD=signal recognition particle receptor (dockingprotein) /DB_XREF=gi:4507222 /UG=Hs.75730 signal recognition particle receptor (docking protein) /FL=gb:BC001162.1 gb:NM_003139.1
200919_at	632.7	P	0.001953	gb:NM_004427.1 /DEF=Homo sapiens early development regulator 2 (homolog of polyhomeotic 2) (EDR2), mRNA. /FEA=mRNA /GEN=EDR2 /PROD=early development regulator 2 /DB_XREF=gi:4758241 /UG=Hs.75878 early development regulator 2 (homolog of polyhomeotic 2) /FL=gb:U89278.1 gb:NM_004427.1
200920_s_at	2155.0	P	0.000244	Consensus includes gb:AL535380 /FEA=EST /DB_XREF=gi:12798873 /DB_XREF=est:AL535380 /CLONE=CS0DF009YN13 (5 prime) /UG=Hs.77054 B-cell translocation gene 1, anti-proliferative /FL=gb:NM_001731.1
200921_s_at	1611.1	P	0.000244	gb:NM_001731.1 /DEF=Homo sapiens B-cell translocation gene 1, anti-proliferative (BTG1), mRNA. /FEA=mRNA /GEN=BTG1 /PROD=B-cell translocation protein 1 /DB_XREF=gi:4502472 /UG=Hs.77054 B-cell translocation gene 1, anti-proliferative /FL=gb:NM_001731.1
200922_at	329.7	P	0.000244	gb:NM_006801.1 /DEF=Homo sapiens KDEL (Lys-Asp-Glu-Leu) endoplasmic reticulum protein retention receptor 1 (KDELR1), mRNA. /FEA=mRNA /GEN=KDELR1 /PROD=KDEL receptor 1 /DB_XREF=gi:5803047 /UG=Hs.78040 KDEL (Lys-Asp-Glu-Leu) endoplasmic reticulum protein retention receptor 1 /FL=gb:NM_006801.1
200923_at	639.9	P	0.001953	gb:NM_005567.2 /DEF=Homo sapiens lectin, galactoside-binding, soluble, 3 binding protein (galectin 6 binding protein) (LGALS3BP), mRNA. /FEA=mRNA /GEN=LGALS3BP /PROD=galectin 6 binding protein /DB_XREF=gi:6006016 /UG=Hs.79339 lectin, galactoside-binding, soluble, 3 binding protein (galectin 6 binding protein) /FL=gb:BC002403.1 gb:BC002998.1 gb:L13210.1 gb:NM_005567.2
200924_s_at	557.1	P	0.000732	gb:NM_002394.1 /DEF=Homo sapiens solute carrier family 3 (activators of dibasic and neutral amino acid transport), member 2 (SLC3A2), mRNA. /FEA=mRNA /GEN=SLC3A2 /PROD=antigen identified by monoclonal antibodies 4F2,TRA1.10, TROP4, and T43 /DB_XREF=gi:4505140 /UG=Hs.79748 solute carrier family 3 (activators of dibasic and neutral amino acid transport), member 2 /FL=gb:BC001061.1 gb:J02769.1 gb:J0…
200925_at	7382.8	P	0.000244	gb:NM_004373.1 /DEF=Homo sapiens cytochrome c oxidase subunit VIa polypeptide 1 (COX6A1), mRNA. /FEA=mRNA /GEN=COX6A1 /PROD=cytochrome c oxidase subunit VIa polypeptide 1 /DB_XREF=gi:10047079 /UG=Hs.180714 cytochrome c oxidase subunit VIa polypeptide 1 /FL=gb:NM_004373.1
200926_at	16680.0	P	0.000244	gb:NM_001025.1 /DEF=Homo sapiens ribosomal protein S23 (RPS23), mRNA. /FEA=mRNA /GEN=RPS23 /PROD=ribosomal protein S23 /DB_XREF=gi:4506700 /UG=Hs.3463 ribosomal protein S23 /FL=gb:D14530.1 gb:NM_001025.1
200927_s_at	685.3	P	0.000244	Consensus includes gb:AA919115 /FEA=EST /DB_XREF=gi:3059005 /DB_XREF=est:ol85g11.s1 /CLONE=IMAGE:1536452 /UG=Hs.5807 GTPase Rab14 /FL=gb:AF152463.1 gb:AF203689.1 gb:AL162081.1 gb:NM_016322.1
200928_s_at	23.2	P	0.001221	gb:AL162081.1 /DEF=Homo sapiens mRNA; cDNA DKFZp762K0911 (from clone DKFZp762K0911); complete cds. /FEA=mRNA /GEN=DKFZp762K0911 /PROD=hypothetical protein /DB_XREF=gi:7328165 /UG=Hs.5807 GTPase Rab14 /FL=gb:AF152463.1 gb:AF203689.1 gb:AL162081.1 gb:NM_016322.1
200929_at	4240.0	P	0.000244	gb:NM_006827.1 /DEF=Homo sapiens transmembrane trafficking protein (TMP21), mRNA. /FEA=mRNA /GEN=TMP21 /PROD=transmembrane trafficking protein /DB_XREF=gi:5803200 /UG=Hs.74137 transmembrane trafficking protein /FL=gb:BC001825.1 gb:NM_006827.1
200930_s_at	15.8	A	0.398926	Consensus includes gb:AA156675 /FEA=EST /DB_XREF=gi:1728354 /DB_XREF=est:zl18h03.s1 /CLONE=IMAGE:502325 /UG=Hs.75350 vinculin /FL=gb:NM_014000.1
200931_s_at	785.7	P	0.000244	gb:NM_014000.1 /DEF=Homo sapiens vinculin (VCL), transcript variant meta-VCL, mRNA. /FEA=mRNA /GEN=VCL /PROD=VCL isoform meta-VCL /DB_XREF=gi:7669549 /UG=Hs.75350 vinculin /FL=gb:NM_014000.1
200932_s_at	1146.9	P	0.000244	gb:NM_006400.2 /DEF=Homo sapiens dynactin 2 (p50) (DCTN2), mRNA. /FEA=mRNA /GEN=DCTN2 /PROD=dynactin 2 /DB_XREF=gi:13259506 /UG=Hs.84153 dynactin 2 (p50) /FL=gb:U50733.1 gb:BC000718.1 gb:NM_006400.2
200933_x_at	14427.9	P	0.000244	gb:NM_001007.1 /DEF=Homo sapiens ribosomal protein S4, X-linked (RPS4X), mRNA. /FEA=mRNA /GEN=RPS4X /PROD=ribosomal protein S4, X-linked /DB_XREF=gi:4506724 /UG=Hs.108124 ribosomal protein S4, X-linked /FL=gb:BC000472.1 gb:BC002569.1 gb:M58458.1 gb:M22146.1 gb:NM_001007.1
200934_at	1603.5	P	0.000244	gb:NM_003472.1 /DEF=Homo sapiens DEK oncogene (DNA binding) (DEK), mRNA. /FEA=mRNA /GEN=DEK /PROD=DEK oncogene (DNA binding) /DB_XREF=gi:4503248 /UG=Hs.110713 DEK oncogene (DNA binding) /FL=gb:NM_003472.1
200935_at	28.5	P	0.002930	gb:NM_004343.2 /DEF=Homo sapiens calreticulin (CALR), mRNA. /FEA=mRNA /GEN=CALR /PROD=calreticulin precursor /DB_XREF=gi:5921996 /UG=Hs.16488 calreticulin /FL=gb:BC002500.1 gb:M84739.1 gb:M32294.1 gb:NM_004343.2
200936_at	12444.3	P	0.000244	gb:NM_000973.1 /DEF=Homo sapiens ribosomal protein L8 (RPL8), mRNA. /FEA=mRNA /GEN=RPL8 /PROD=ribosomal protein L8 /DB_XREF=gi:4506662 /UG=Hs.178551 ribosomal protein L8 /FL=gb:BC000077.1 gb:NM_000973.1
200937_s_at	5368.1	P	0.000244	gb:NM_000969.1 /DEF=Homo sapiens ribosomal protein L5 (RPL5), mRNA. /FEA=mRNA /GEN=RPL5 /PROD=ribosomal protein L5 /DB_XREF=gi:4506654 /UG=Hs.180946 ribosomal protein L5 /FL=gb:AF113210.1 gb:NM_000969.1 gb:U14966.1
200938_s_at	13.2	A	0.194580	Consensus includes gb:AI920976 /FEA=EST /DB_XREF=gi:5656940 /DB_XREF=est:wo16h05.x1 /CLONE=IMAGE:2455545 /UG=Hs.194369 arginine-glutamic acid dipeptide (RE) repeats /FL=gb:AF118275.1 gb:NM_012102.1 gb:AB036737.1
200939_s_at	21.9	P	0.037598	gb:NM_012102.1 /DEF=Homo sapiens arginine-glutamic acid dipeptide (RE) repeats (RERE), mRNA. /FEA=mRNA /GEN=RERE /PROD=arginine-glutamic acid dipeptide (RE) repeats /DB_XREF=gi:6912253 /UG=Hs.194369 arginine-glutamic acid dipeptide (RE) repeats /FL=gb:AF118275.1 gb:NM_012102.1 gb:AB036737.1
200940_s_at	344.8	P	0.000244	gb:AB036737.1 /DEF=Homo sapiens mRNA for RERE, complete cds. /FEA=mRNA /PROD=RERE /DB_XREF=gi:8096339 /UG=Hs.194369 arginine-glutamic acid dipeptide (RE) repeats /FL=gb:AF118275.1 gb:NM_012102.1 gb:AB036737.1
200941_at	1510.9	P	0.000244	Consensus includes gb:AK026575.1 /DEF=Homo sapiens cDNA: FLJ22922 fis, clone KAT06722. /FEA=mRNA /DB_XREF=gi:10439459 /UG=Hs.250899 heat shock factor binding protein 1 /FL=gb:AF068754.1 gb:NM_001537.1
200942_s_at	4790.2	P	0.000244	gb:NM_001537.1 /DEF=Homo sapiens heat shock factor binding protein 1 (HSBP1), mRNA. /FEA=mRNA /GEN=HSBP1 /PROD=heat shock factor binding protein 1 /DB_XREF=gi:4557646 /UG=Hs.250899 heat shock factor binding protein 1 /FL=gb:AF068754.1 gb:NM_001537.1
200943_at	9897.5	P	0.000244	gb:NM_004965.1 /DEF=Homo sapiens high-mobility group (nonhistone chromosomal) protein 14 (HMG14), mRNA. /FEA=mRNA /GEN=HMG14 /PROD=high-mobility group (nonhistone chromosomal)protein 14 /DB_XREF=gi:4826757 /UG=Hs.251064 high-mobility group (nonhistone chromosomal) protein 14 /FL=gb:BC000075.1 gb:J02621.1 gb:NM_004965.1
200944_s_at	8760.2	P	0.000244	gb:NM_004965.1 /DEF=Homo sapiens high-mobility group (nonhistone chromosomal) protein 14 (HMG14), mRNA. /FEA=mRNA /GEN=HMG14 /PROD=high-mobility group (nonhistone chromosomal)protein 14 /DB_XREF=gi:4826757 /UG=Hs.251064 high-mobility group (nonhistone chromosomal) protein 14 /FL=gb:BC000075.1 gb:J02621.1 gb:NM_004965.1
200945_s_at	1217.4	P	0.000244	gb:NM_014933.1 /DEF=Homo sapiens yeast Sec31p homolog (KIAA0905), mRNA. /FEA=mRNA /GEN=KIAA0905 /PROD=yeast Sec31p homolog /DB_XREF=gi:7662369 /UG=Hs.70266 yeast Sec31p homolog /FL=gb:AB018359.1 gb:NM_014933.1 gb:AF139184.1
200946_x_at	415.7	P	0.000732	Consensus includes gb:AI339331 /FEA=EST /DB_XREF=gi:4076258 /DB_XREF=est:qt01g12.x1 /CLONE=IMAGE:1946374 /UG=Hs.77508 glutamate dehydrogenase 1 /FL=gb:J03248.1 gb:M37154.1 gb:M20867.1 gb:NM_005271.1
200947_s_at	590.6	P	0.000732	gb:NM_005271.1 /DEF=Homo sapiens glutamate dehydrogenase 1 (GLUD1), mRNA. /FEA=mRNA /GEN=GLUD1 /PROD=glutamate dehydrogenase 1 /DB_XREF=gi:4885280 /UG=Hs.77508 glutamate dehydrogenase 1 /FL=gb:J03248.1 gb:M37154.1 gb:M20867.1 gb:NM_005271.1
200948_at	408.3	P	0.000244	gb:NM_005439.1 /DEF=Homo sapiens myeloid leukemia factor 2 (MLF2), mRNA. /FEA=mRNA /GEN=MLF2 /PROD=myeloid leukemia factor 2 /DB_XREF=gi:4885486 /UG=Hs.79026 myeloid leukemia factor 2 /FL=gb:BC000898.1 gb:BC002340.1 gb:U57342.1 gb:AF070539.1 gb:NM_005439.1
200949_x_at	7946.0	P	0.000244	gb:NM_001023.1 /DEF=Homo sapiens ribosomal protein S20 (RPS20), mRNA. /FEA=mRNA /GEN=RPS20 /PROD=ribosomal protein S20 /DB_XREF=gi:4506696 /UG=Hs.8102 ribosomal protein S20 /FL=gb:L06498.1 gb:NM_001023.1
200950_at	2427.7	P	0.000244	gb:NM_006409.1 /DEF=Homo sapiens actin related protein 23 complex, subunit 1A (41 kD) (ARPC1A), mRNA. /FEA=mRNA /GEN=ARPC1A /PROD=actin related protein 23 complex, subunit 1A(41 kD) /DB_XREF=gi:5454077 /UG=Hs.90370 actin related protein 23 complex, subunit 1A (41 kD) /FL=gb:NM_006409.1
200951_s_at	1.6	A	0.943848	Consensus includes gb:AW026491 /FEA=EST /DB_XREF=gi:5880021 /DB_XREF=est:wv14b06.x1 /CLONE=IMAGE:2529491 /UG=Hs.75586 cyclin D2 /FL=gb:M90813.1 gb:D13639.1 gb:NM_001759.1
200952_s_at	1.0	A	0.953857	Consensus includes gb:AI635187 /FEA=EST /DB_XREF=gi:4686517 /DB_XREF=est:tz22b10.x1 /CLONE=IMAGE:2289307 /UG=Hs.75586 cyclin D2 /FL=gb:M90813.1 gb:D13639.1 gb:NM_001759.1
200953_s_at	13.5	A	0.398926	gb:NM_001759.1 /DEF=Homo sapiens cyclin D2 (CCND2), mRNA. /FEA=mRNA /GEN=CCND2 /PROD=cyclin D2 /DB_XREF=gi:4502616 /UG=Hs.75586 cyclin D2 /FL=gb:M90813.1 gb:D13639.1 gb:NM_001759.1
200954_at	468.7	A	0.111572	gb:NM_001694.1 /DEF=Homo sapiens ATPase, H+ transporting, lysosomal (vacuolar proton pump) 16kD (ATP6L), mRNA. /FEA=mRNA /GEN=ATP6L /PROD=ATPase, H+ transporting, lysosomal (vacuolarproton pump) 16kD /DB_XREF=gi:4502312 /UG=Hs.76159 ATPase, H+ transporting, lysosomal (vacuolar proton pump) 16kD /FL=gb:BC004537.1 gb:M62762.1 gb:NM_001694.1
200955_at	1035.6	P	0.000244	gb:NM_006839.1 /DEF=Homo sapiens inner membrane protein, mitochondrial (mitofilin) (IMMT), mRNA. /FEA=mRNA /GEN=IMMT /PROD=inner membrane protein, mitochondrial(mitofilin) /DB_XREF=gi:5803114 /UG=Hs.78504 inner membrane protein, mitochondrial (mitofilin) /FL=gb:L42572.1 gb:BC002412.1 gb:D21094.1 gb:NM_006839.1
200956_s_at	191.7	P	0.001221	Consensus includes gb:BE795648 /FEA=EST /DB_XREF=gi:10216846 /DB_XREF=est:601590631F1 /CLONE=IMAGE:3945006 /UG=Hs.79162 structure specific recognition protein 1 /FL=gb:BC005116.1 gb:M86737.1 gb:NM_003146.1
200957_s_at	279.4	P	0.000732	gb:NM_003146.1 /DEF=Homo sapiens structure specific recognition protein 1 (SSRP1), mRNA. /FEA=mRNA /GEN=SSRP1 /PROD=structure specific recognition protein 1 /DB_XREF=gi:4507240 /UG=Hs.79162 structure specific recognition protein 1 /FL=gb:BC005116.1 gb:M86737.1 gb:NM_003146.1
200958_s_at	3139.4	P	0.000244	gb:NM_005625.1 /DEF=Homo sapiens syndecan binding protein (syntenin) (SDCBP), mRNA. /FEA=mRNA /GEN=SDCBP /PROD=syndecan binding protein (syntenin) /DB_XREF=gi:5032082 /UG=Hs.8180 syndecan binding protein (syntenin) /FL=gb:AF000652.1 gb:NM_005625.1
200959_at	3432.1	P	0.000244	gb:NM_004960.1 /DEF=Homo sapiens fusion, derived from t(12;16) malignant liposarcoma (FUS), mRNA. /FEA=mRNA /GEN=FUS /PROD=fusion, derived from t(12;16) malignantliposarcoma /DB_XREF=gi:4826733 /UG=Hs.99969 fusion, derived from t(12;16) malignant liposarcoma /FL=gb:BC000402.1 gb:BC002459.1 gb:NM_004960.1
200960_x_at	3130.2	P	0.001953	gb:NM_007096.1 /DEF=Homo sapiens clathrin, light polypeptide (Lca) (CLTA), transcript variant brain-specific, mRNA. /FEA=mRNA /GEN=CLTA /PROD=clathrin, light polypeptide A (Lca) isoform b /DB_XREF=gi:6005992 /UG=Hs.104143 clathrin, light polypeptide (Lca) /FL=gb:M20471.1 gb:NM_007096.1
200961_at	2708.6	P	0.000244	gb:NM_012248.1 /DEF=Homo sapiens selenophosphate synthetase 2 (SPS2), mRNA. /FEA=mRNA /GEN=SPS2 /PROD=selenophosphate synthetase 2 /DB_XREF=gi:7657612 /UG=Hs.118725 selenophosphate synthetase 2 /FL=gb:BC002381.1 gb:U43286.1 gb:NM_012248.1
200962_at	183.0	P	0.001953	Consensus includes gb:AI348010 /FEA=EST /DB_XREF=gi:4085216 /DB_XREF=est:qp61b10.x1 /CLONE=IMAGE:1927483 /UG=Hs.184014 ribosomal protein L31 /FL=gb:NM_000993.1
200963_x_at	12656.6	P	0.000244	gb:NM_000993.1 /DEF=Homo sapiens ribosomal protein L31 (RPL31), mRNA. /FEA=mRNA /GEN=RPL31 /PROD=ribosomal protein L31 /DB_XREF=gi:4506632 /UG=Hs.184014 ribosomal protein L31 /FL=gb:NM_000993.1
200964_at	565.7	P	0.000244	gb:NM_003334.1 /DEF=Homo sapiens ubiquitin-activating enzyme E1 (A1S9T and BN75 temperature sensitivity complementing) (UBE1), mRNA. /FEA=mRNA /GEN=UBE1 /PROD=ubiquitin-activating enzyme E1 (A1S9T and BN75temperature sensitivity complementing) /DB_XREF=gi:4507762 /UG=Hs.2055 ubiquitin-activating enzyme E1 (A1S9T and BN75 temperature sensitivity complementing) /FL=gb:M58028.1 gb:NM_003334.1
200965_s_at	533.8	P	0.000244	gb:NM_006720.1 /DEF=Homo sapiens actin binding LIM protein 1 (ABLIM), transcript variant ABLIM-s, mRNA. /FEA=mRNA /GEN=ABLIM /PROD=actin-binding LIM protein 1, isoform s /DB_XREF=gi:5921987 /UG=Hs.158203 actin binding LIM protein 1 /FL=gb:D31883.1 gb:NM_006720.1
200966_x_at	7961.0	P	0.000244	gb:NM_000034.1 /DEF=Homo sapiens aldolase A, fructose-bisphosphate (ALDOA), mRNA. /FEA=mRNA /GEN=ALDOA /PROD=aldolase A /DB_XREF=gi:4557304 /UG=Hs.273415 aldolase A, fructose-bisphosphate /FL=gb:BC004333.1 gb:M11560.1 gb:NM_000034.1
200967_at	4727.7	P	0.000244	gb:NM_000942.1 /DEF=Homo sapiens peptidylprolyl isomerase B (cyclophilin B) (PPIB), mRNA. /FEA=mRNA /GEN=PPIB /PROD=peptidylprolyl isomerase B (cyclophilin B) /DB_XREF=gi:4758949 /UG=Hs.699 peptidylprolyl isomerase B (cyclophilin B) /FL=gb:BC001125.1 gb:M60857.1 gb:M63573.1 gb:NM_000942.1
200968_s_at	3419.6	P	0.000244	gb:NM_000942.1 /DEF=Homo sapiens peptidylprolyl isomerase B (cyclophilin B) (PPIB), mRNA. /FEA=mRNA /GEN=PPIB /PROD=peptidylprolyl isomerase B (cyclophilin B) /DB_XREF=gi:4758949 /UG=Hs.699 peptidylprolyl isomerase B (cyclophilin B) /FL=gb:BC001125.1 gb:M60857.1 gb:M63573.1 gb:NM_000942.1
200969_at	1119.2	P	0.000244	Consensus includes gb:BG107676 /FEA=EST /DB_XREF=gi:12601522 /DB_XREF=est:602277844F1 /CLONE=IMAGE:4365370 /UG=Hs.76698 stress-associated endoplasmic reticulum protein 1; ribosome associated membrane protein 4 /FL=gb:AL136807.1 gb:AF136975.1 gb:AB022427.1 gb:NM_014445.1
200970_s_at	821.3	P	0.001221	gb:AL136807.1 /DEF=Homo sapiens mRNA; cDNA DKFZp434L1621 (from clone DKFZp434L1621); complete cds. /FEA=mRNA /GEN=DKFZp434L1621 /PROD=hypothetical protein /DB_XREF=gi:12053124 /UG=Hs.76698 stress-associated endoplasmic reticulum protein 1; ribosome associated membrane protein 4 /FL=gb:AL136807.1 gb:AF136975.1 gb:AB022427.1 gb:NM_014445.1
200971_s_at	3053.3	P	0.000244	gb:NM_014445.1 /DEF=Homo sapiens stress-associated endoplasmic reticulum protein 1; ribosome associated membrane protein 4 (SERP1), mRNA. /FEA=mRNA /GEN=SERP1 /PROD=stress-associated endoplasmic reticulum protein1; ribosome associated membrane protein 4 /DB_XREF=gi:7657551 /UG=Hs.76698 stress-associated endoplasmic reticulum protein 1; ribosome associated membrane protein 4 /FL=gb:AL136807.1 gb:A…
200972_at	2224.7	P	0.000244	gb:BC000704.1 /DEF=Homo sapiens, tetraspan 3, clone MGC:965, mRNA, complete cds. /FEA=mRNA /PROD=tetraspan 3 /DB_XREF=gi:12653830 /UG=Hs.100090 tetraspan 3 /FL=gb:BC000704.1 gb:BC004280.1 gb:AF054840.1 gb:NM_005724.1 gb:AF133423.1
200973_s_at	1154.4	P	0.000244	gb:NM_005724.1 /DEF=Homo sapiens tetraspan 3 (TSPAN-3), mRNA. /FEA=mRNA /GEN=TSPAN-3 /PROD=tetraspan 3 /DB_XREF=gi:5032200 /UG=Hs.100090 tetraspan 3 /FL=gb:BC000704.1 gb:BC004280.1 gb:AF054840.1 gb:NM_005724.1 gb:AF133423.1
200974_at	84.1	P	0.004150	gb:NM_001613.1 /DEF=Homo sapiens actin, alpha 2, smooth muscle, aorta (ACTA2), mRNA. /FEA=mRNA /GEN=ACTA2 /PROD=alpha 2 actin /DB_XREF=gi:4501882 /UG=Hs.195851 actin, alpha 2, smooth muscle, aorta /FL=gb:J05192.1 gb:NM_001613.1
200975_at	2407.0	P	0.000244	gb:NM_000310.1 /DEF=Homo sapiens palmitoyl-protein thioesterase 1 (ceroid-lipofuscinosis, neuronal 1, infantile) (PPT1), mRNA. /FEA=mRNA /GEN=PPT1 /PROD=palmitoyl-protein thioesterase 1(ceroid-lipofuscinosis, neuronal 1, infantile) /DB_XREF=gi:4506030 /UG=Hs.3873 palmitoyl-protein thioesterase 1 (ceroid-lipofuscinosis, neuronal 1, infantile) /FL=gb:U44772.1 gb:NM_000310.1
200976_s_at	1804.3	P	0.000244	gb:NM_006024.2 /DEF=Homo sapiens Tax1 (human T-cell leukemia virus type I) binding protein 1 (TAX1BP1), mRNA. /FEA=mRNA /GEN=TAX1BP1 /PROD=Tax1 (human T-cell leukemia virus type I)binding protein 1 /DB_XREF=gi:5803188 /UG=Hs.5437 Tax1 (human T-cell leukemia virus type I) binding protein 1 /FL=gb:U33821.2 gb:NM_006024.2 gb:AF090891.1 gb:AF268075.1
200977_s_at	1946.4	P	0.000244	gb:AF090891.1 /DEF=Homo sapiens clone HQ0105 PRO0105 mRNA, complete cds. /FEA=mRNA /PROD=PRO0105 /DB_XREF=gi:6690159 /UG=Hs.5437 Tax1 (human T-cell leukemia virus type I) binding protein 1 /FL=gb:U33821.2 gb:NM_006024.2 gb:AF090891.1 gb:AF268075.1
200978_at	3323.7	P	0.000244	gb:NM_005917.1 /DEF=Homo sapiens malate dehydrogenase 1, NAD (soluble) (MDH1), mRNA. /FEA=mRNA /GEN=MDH1 /PROD=malate dehydrogenase 1, NAD (soluble) /DB_XREF=gi:5174538 /UG=Hs.75375 malate dehydrogenase 1, NAD (soluble) /FL=gb:D55654.1 gb:U20352.1 gb:NM_005917.1
200979_at	105.6	P	0.000244	Consensus includes gb:BF739979 /FEA=EST /DB_XREF=gi:12066655 /DB_XREF=est:7o41g06.x1 /CLONE=IMAGE:3576778 /UG=Hs.1023 pyruvate dehydrogenase (lipoamide) alpha 1 /FL=gb:L48690.1 gb:BC002406.1 gb:J03575.1 gb:M24848.1 gb:L13318.1 gb:NM_000284.1
200980_s_at	1619.9	P	0.005859	gb:NM_000284.1 /DEF=Homo sapiens pyruvate dehydrogenase (lipoamide) alpha 1 (PDHA1), mRNA. /FEA=mRNA /GEN=PDHA1 /PROD=pyruvate dehydrogenase (lipoamide) alpha 1 /DB_XREF=gi:4505684 /UG=Hs.1023 pyruvate dehydrogenase (lipoamide) alpha 1 /FL=gb:L48690.1 gb:BC002406.1 gb:J03575.1 gb:M24848.1 gb:L13318.1 gb:NM_000284.1
200981_x_at	13143.3	P	0.000244	gb:NM_016592.1 /DEF=Homo sapiens neuroendocrine secretory protein 55 (NESP55), mRNA. /FEA=mRNA /GEN=NESP55 /PROD=neuroendocrine secretory protein 55 /DB_XREF=gi:7706588 /UG=Hs.113368 neuroendocrine secretory protein 55 /FL=gb:AF105253.1 gb:NM_016592.1
200982_s_at	76.9	P	0.001953	gb:NM_001155.2 /DEF=Homo sapiens annexin A6 (ANXA6), transcript variant 1, mRNA. /FEA=mRNA /GEN=ANXA6 /PROD=annexin VI isoform 1 /DB_XREF=gi:4809274 /UG=Hs.118796 annexin A6 /FL=gb:J03578.1 gb:D00510.1 gb:NM_001155.2
200983_x_at	1819.1	P	0.000244	Consensus includes gb:BF983379 /FEA=EST /DB_XREF=gi:12386191 /DB_XREF=est:602305270F1 /CLONE=IMAGE:4396576 /UG=Hs.119663 CD59 antigen p18-20 (antigen identified by monoclonal antibodies 16.3A5, EJ16, EJ30, EL32 and G344) /FL=gb:NM_000611.1 gb:M34671.1
200984_s_at	1123.8	P	0.000244	Consensus includes gb:X16447.1 /DEF=Human mRNA for CD59, an LY-6-like protein regulating complement membrane attack. /FEA=mRNA /PROD=precursor polypeptide (AA -25 to 103) /DB_XREF=gi:29805 /UG=Hs.119663 CD59 antigen p18-20 (antigen identified by monoclonal antibodies 16.3A5, EJ16, EJ30, EL32 and G344) /FL=gb:NM_000611.1 gb:M34671.1
200985_s_at	1643.4	P	0.000244	gb:NM_000611.1 /DEF=Homo sapiens CD59 antigen p18-20 (antigen identified by monoclonal antibodies 16.3A5, EJ16, EJ30, EL32 and G344) (CD59), mRNA. /FEA=mRNA /GEN=CD59 /PROD=CD59 antigen p18-20 (antigen identified bymonoclonal antibodies 16.3A5, EJ16, EJ30, EL32 and G344) /DB_XREF=gi:10835164 /UG=Hs.119663 CD59 antigen p18-20 (antigen identified by monoclonal antibodies 16.3A5, EJ16, EJ30, EL32 an…
200986_at	3.6	A	0.533936	gb:NM_000062.1 /DEF=Homo sapiens serine (or cysteine) proteinase inhibitor, clade G (C1 inhibitor), member 1 (SERPING1), mRNA. /FEA=mRNA /GEN=SERPING1 /PROD=complement component 1 inhibitor precursor /DB_XREF=gi:4557378 /UG=Hs.151242 serine (or cysteine) proteinase inhibitor, clade G (C1 inhibitor), member 1 /FL=gb:M13690.1 gb:M13656.1 gb:NM_000062.1
200987_x_at	294.5	P	0.000732	Consensus includes gb:AA758755 /FEA=EST /DB_XREF=gi:2806618 /DB_XREF=est:ah80c08.s1 /CLONE=1321934 /UG=Hs.152978 proteasome (prosome, macropain) activator subunit 3 (PA28 gamma; Ki) /FL=gb:NM_005789.1 gb:U11292.1
200988_s_at	54.4	P	0.000244	gb:NM_005789.1 /DEF=Homo sapiens proteasome (prosome, macropain) activator subunit 3 (PA28 gamma; Ki) (PSME3), mRNA. /FEA=mRNA /GEN=PSME3 /PROD=proteasome (prosome, macropain) activatorsubunit 3 (PA28 gamma; Ki) /DB_XREF=gi:5031996 /UG=Hs.152978 proteasome (prosome, macropain) activator subunit 3 (PA28 gamma; Ki) /FL=gb:NM_005789.1 gb:U11292.1
200989_at	3634.6	P	0.000244	gb:NM_001530.1 /DEF=Homo sapiens hypoxia-inducible factor 1, alpha subunit (basic helix-loop-helix transcription factor) (HIF1A), mRNA. /FEA=mRNA /GEN=HIF1A /PROD=hypoxia-inducible factor 1, alpha subunit (basichelix-loop-helix transcription factor) /DB_XREF=gi:4504384 /UG=Hs.197540 hypoxia-inducible factor 1, alpha subunit (basic helix-loop-helix transcription factor) /FL=gb:U29165.1 gb:AF304431…
200990_at	500.7	P	0.000732	gb:NM_005762.1 /DEF=Homo sapiens KRAB-associated protein 1 (TIF1B), mRNA. /FEA=mRNA /GEN=TIF1B /PROD=KRAB-associated protein 1 /DB_XREF=gi:5032178 /UG=Hs.228059 KRAB-associated protein 1 /FL=gb:BC004978.1 gb:U78773.1 gb:U95040.1 gb:NM_005762.1
200991_s_at	615.0	P	0.000732	gb:NM_014748.1 /DEF=Homo sapiens KIAA0064 gene product (KIAA0064), mRNA. /FEA=mRNA /GEN=KIAA0064 /PROD=KIAA0064 gene product /DB_XREF=gi:7661889 /UG=Hs.278569 sorting nexin 17 /FL=gb:BC002524.1 gb:BC002610.1 gb:D31764.1 gb:NM_014748.1
200992_at	1077.2	P	0.000244	Consensus includes gb:AL137335.1 /DEF=Homo sapiens mRNA; cDNA DKFZp434A179 (from clone DKFZp434A179); partial cds. /FEA=mRNA /GEN=DKFZp434A179 /PROD=hypothetical protein /DB_XREF=gi:6807827 /UG=Hs.5151 RAN binding protein 7 /FL=gb:AF098799.1 gb:NM_006391.1
200993_at	1034.5	P	0.000244	Consensus includes gb:AA939270 /FEA=EST /DB_XREF=gi:3099183 /DB_XREF=est:oq31b02.s1 /CLONE=IMAGE:1587915 /UG=Hs.5151 RAN binding protein 7 /FL=gb:AF098799.1 gb:NM_006391.1
200994_at	902.1	P	0.000244	Consensus includes gb:BG291787 /FEA=EST /DB_XREF=gi:13050002 /DB_XREF=est:602386007F1 /CLONE=IMAGE:4515240 /UG=Hs.5151 RAN binding protein 7 /FL=gb:AF098799.1 gb:NM_006391.1
200995_at	236.6	P	0.001221	Consensus includes gb:AI741392 /FEA=EST /DB_XREF=gi:5109680 /DB_XREF=est:wg27b08.x1 /CLONE=IMAGE:2366295 /UG=Hs.5151 RAN binding protein 7 /FL=gb:AF098799.1 gb:NM_006391.1
200996_at	2802.1	P	0.000244	gb:NM_005721.2 /DEF=Homo sapiens ARP3 (actin-related protein 3, yeast) homolog (ACTR3), mRNA. /FEA=mRNA /GEN=ACTR3 /PROD=ARP3 (actin-related protein 3, yeast) homolog /DB_XREF=gi:7262289 /UG=Hs.5321 ARP3 (actin-related protein 3, yeast) homolog /FL=gb:AF006083.1 gb:NM_005721.2
200997_at	1857.5	P	0.000244	gb:NM_002896.1 /DEF=Homo sapiens RNA binding motif protein 4 (RBM4), mRNA. /FEA=mRNA /GEN=RBM4 /PROD=RNA binding motif protein 4 /DB_XREF=gi:4506444 /UG=Hs.6106 RNA binding motif protein 4 /FL=gb:BC000307.1 gb:U89505.1 gb:NM_002896.1
200998_s_at	524.1	P	0.000244	Consensus includes gb:AW029619 /FEA=EST /DB_XREF=gi:5888375 /DB_XREF=est:wx14e05.x1 /CLONE=IMAGE:2543648 /UG=Hs.74368 transmembrane protein (63kD), endoplasmic reticulumGolgi intermediate compartment /FL=gb:NM_006825.1
200999_s_at	1533.6	P	0.000244	gb:NM_006825.1 /DEF=Homo sapiens transmembrane protein (63kD), endoplasmic reticulumGolgi intermediate compartment (P63), mRNA. /FEA=mRNA /GEN=P63 /PROD=transmembrane protein (63kD), endoplasmicreticulumGolgi intermediate compartment /DB_XREF=gi:5803112 /UG=Hs.74368 transmembrane protein (63kD), endoplasmic reticulumGolgi intermediate compartment /FL=gb:NM_006825.1
201000_at	1228.0	P	0.000244	gb:NM_001605.1 /DEF=Homo sapiens alanyl-tRNA synthetase (AARS), mRNA. /FEA=mRNA /GEN=AARS /PROD=alanyl-tRNA synthetase /DB_XREF=gi:4501840 /UG=Hs.75102 alanyl-tRNA synthetase /FL=gb:D32050.1 gb:NM_001605.1
201001_s_at	1991.0	P	0.000244	Consensus includes gb:BG164064 /FEA=EST /DB_XREF=gi:12670767 /DB_XREF=est:602341091F1 /CLONE=IMAGE:4449022 /UG=Hs.75875 ubiquitin-conjugating enzyme E2 variant 1 /FL=gb:U39361.1 gb:NM_003349.2 gb:BC000468.1
201002_s_at	2608.3	P	0.000244	gb:U39361.1 /DEF=Homo sapiens DNA-binding protein (CROC-1B) mRNA, complete cds. /FEA=mRNA /GEN=CROC-1B /PROD=DNA-binding protein /DB_XREF=gi:1066081 /UG=Hs.75875 ubiquitin-conjugating enzyme E2 variant 1 /FL=gb:U39361.1 gb:NM_003349.2 gb:BC000468.1
201003_x_at	486.9	P	0.000244	gb:NM_003349.2 /DEF=Homo sapiens ubiquitin-conjugating enzyme E2 variant 1 (UBE2V1), transcript variant 2, mRNA. /FEA=mRNA /GEN=UBE2V1 /PROD=ubiquitin-conjugating enzyme E2 variant 1,isoform b /DB_XREF=gi:12025659 /UG=Hs.75875 ubiquitin-conjugating enzyme E2 variant 1 /FL=gb:U39361.1 gb:NM_003349.2 gb:BC000468.1
201004_at	5229.7	P	0.000244	gb:NM_006280.1 /DEF=Homo sapiens signal sequence receptor, delta (translocon-associated protein delta) (SSR4), mRNA. /FEA=mRNA /GEN=SSR4 /PROD=signal sequence receptor, delta /DB_XREF=gi:5454089 /UG=Hs.102135 signal sequence receptor, delta (translocon-associated protein delta) /FL=gb:BC003371.1 gb:NM_006280.1
201005_at	5408.0	P	0.000244	gb:NM_001769.1 /DEF=Homo sapiens CD9 antigen (p24) (CD9), mRNA. /FEA=mRNA /GEN=CD9 /PROD=CD9 antigen (p24) /DB_XREF=gi:4502692 /UG=Hs.1244 CD9 antigen (p24) /FL=gb:M38690.1 gb:NM_001769.1 gb:L34068.1
201006_at	61.7	P	0.046143	gb:NM_005809.1 /DEF=Homo sapiens peroxiredoxin 2 (PRDX2), mRNA. /FEA=mRNA /GEN=PRDX2 /PROD=peroxiredoxin 2 /DB_XREF=gi:5902725 /UG=Hs.146354 peroxiredoxin 2 /FL=gb:BC000452.1 gb:BC003022.1 gb:NM_005809.1
201007_at	2224.5	P	0.000732	gb:NM_000183.1 /DEF=Homo sapiens hydroxyacyl-Coenzyme A dehydrogenase3-ketoacyl-Coenzyme A thiolaseenoyl-Coenzyme A hydratase (trifunctional protein), beta subunit (HADHB), mRNA. /FEA=mRNA /GEN=HADHB /PROD=hydroxyacyl-Coenzyme Adehydrogenase3-ketoacyl-Coenzyme Athiolaseenoyl-Coenzyme A hydratase (trifunctionalprotein), beta subunit /DB_XREF=gi:4504326 /UG=Hs.146812 hydroxyacyl-Coenzyme A dehydrog…
201008_s_at	908.2	P	0.000244	Consensus includes gb:AA812232 /FEA=EST /DB_XREF=gi:2881843 /DB_XREF=est:ob84h09.s1 /CLONE=IMAGE:1338113 /UG=Hs.179526 upregulated by 1,25-dihydroxyvitamin D-3 /FL=gb:NM_006472.1 gb:S73591.1
201009_s_at	797.4	P	0.000244	Consensus includes gb:AI439556 /FEA=EST /DB_XREF=gi:4305149 /DB_XREF=est:tc90c12.x1 /CLONE=IMAGE:2073430 /UG=Hs.179526 upregulated by 1,25-dihydroxyvitamin D-3 /FL=gb:NM_006472.1 gb:S73591.1
201010_s_at	1957.5	P	0.000244	gb:NM_006472.1 /DEF=Homo sapiens upregulated by 1,25-dihydroxyvitamin D-3 (VDUP1), mRNA. /FEA=mRNA /GEN=VDUP1 /PROD=upregulated by 1,25-dihydroxyvitamin D-3 /DB_XREF=gi:5454161 /UG=Hs.179526 upregulated by 1,25-dihydroxyvitamin D-3 /FL=gb:NM_006472.1 gb:S73591.1
201011_at	1175.2	P	0.000244	gb:NM_002950.1 /DEF=Homo sapiens ribophorin I (RPN1), mRNA. /FEA=mRNA /GEN=RPN1 /PROD=ribophorin I /DB_XREF=gi:4506674 /UG=Hs.2280 ribophorin I /FL=gb:NM_002950.1
201012_at	16.6	P	0.000732	gb:NM_000700.1 /DEF=Homo sapiens annexin A1 (ANXA1), mRNA. /FEA=mRNA /GEN=ANXA1 /PROD=annexin I /DB_XREF=gi:4502100 /UG=Hs.78225 annexin A1 /FL=gb:BC001275.1 gb:NM_000700.1
201013_s_at	1344.9	P	0.000244	Consensus includes gb:AA902652 /FEA=EST /DB_XREF=gi:3037775 /DB_XREF=est:ok71a12.s1 /CLONE=IMAGE:1519390 /UG=Hs.117950 multifunctional polypeptide similar to SAICAR synthetase and AIR carboxylase /FL=gb:NM_006452.1
201014_s_at	473.7	P	0.000244	gb:NM_006452.1 /DEF=Homo sapiens multifunctional polypeptide similar to SAICAR synthetase and AIR carboxylase (ADE2H1), mRNA. /FEA=mRNA /GEN=ADE2H1 /PROD=multifunctional polypeptide similar to SAICARsynthetase and AIR carboxylase /DB_XREF=gi:5453538 /UG=Hs.117950 multifunctional polypeptide similar to SAICAR synthetase and AIR carboxylase /FL=gb:NM_006452.1
201015_s_at	1326.0	P	0.000244	gb:NM_021991.1 /DEF=Homo sapiens junction plakoglobin (JUP), transcript variant 2, mRNA. /FEA=mRNA /GEN=JUP /PROD=junction plakoglobin, isoform 1 /DB_XREF=gi:12056467 /UG=Hs.2340 junction plakoglobin /FL=gb:NM_021991.1 gb:BC000441.1
201016_at	553.8	P	0.000732	Consensus includes gb:BE542684 /FEA=EST /DB_XREF=gi:9771329 /DB_XREF=est:601067180F1 /CLONE=IMAGE:3453571 /UG=Hs.4310 eukaryotic translation initiation factor 1A /FL=gb:BC000793.1 gb:L18960.1 gb:NM_001412.1
201017_at	274.5	P	0.000244	Consensus includes gb:BG149698 /FEA=EST /DB_XREF=gi:12661728 /DB_XREF=est:nad32e01.x1 /CLONE=IMAGE:3367368 /UG=Hs.4310 eukaryotic translation initiation factor 1A /FL=gb:BC000793.1 gb:L18960.1 gb:NM_001412.1
201018_at	243.8	P	0.000244	Consensus includes gb:AL079283.1 /DEF=Homo sapiens mRNA full length insert cDNA clone EUROIMAGE 39515. /FEA=mRNA /DB_XREF=gi:5102744 /UG=Hs.4310 eukaryotic translation initiation factor 1A /FL=gb:BC000793.1 gb:L18960.1 gb:NM_001412.1
201019_s_at	1461.2	P	0.000244	gb:NM_001412.1 /DEF=Homo sapiens eukaryotic translation initiation factor 1A (EIF1A), mRNA. /FEA=mRNA /GEN=EIF1A /PROD=eukaryotic translation initiation factor 1A /DB_XREF=gi:4503498 /UG=Hs.4310 eukaryotic translation initiation factor 1A /FL=gb:BC000793.1 gb:L18960.1 gb:NM_001412.1
201020_at	707.9	P	0.000244	gb:NM_003405.1 /DEF=Homo sapiens tyrosine 3-monooxygenasetryptophan 5-monooxygenase activation protein, eta polypeptide (YWHAH), mRNA. /FEA=mRNA /GEN=YWHAH /PROD=tyrosine 3-monooxygenasetryptophan5-monooxygenase activation protein, eta polypeptide /DB_XREF=gi:4507950 /UG=Hs.75544 tyrosine 3-monooxygenasetryptophan 5-monooxygenase activation protein, eta polypeptide /FL=gb:BC003047.1 gb:L20422.1 g…
201021_s_at	3427.0	P	0.000244	Consensus includes gb:BF697964 /FEA=EST /DB_XREF=gi:11983372 /DB_XREF=est:602130050F1 /CLONE=IMAGE:4286556 /UG=Hs.82306 destrin (actin depolymerizing factor) /FL=gb:NM_006870.2
201022_s_at	6528.9	P	0.000244	gb:NM_006870.2 /DEF=Homo sapiens destrin (actin depolymerizing factor) (ADF), mRNA. /FEA=mRNA /GEN=ADF /PROD=destrin (actin depolymerizing factor) /DB_XREF=gi:6466447 /UG=Hs.82306 destrin (actin depolymerizing factor) /FL=gb:NM_006870.2
201023_at	2070.1	P	0.000244	gb:NM_005642.1 /DEF=Homo sapiens TATA box binding protein (TBP)-associated factor, RNA polymerase II, F, 55kD (TAF2F), mRNA. /FEA=mRNA /GEN=TAF2F /PROD=TATA box binding protein (TBP)-associatedfactor, RNA polymerase II, F, 55kD /DB_XREF=gi:5032148 /UG=Hs.155188 TATA box binding protein (TBP)-associated factor, RNA polymerase II, F, 55kD /FL=gb:NM_005642.1 gb:U18062.1
201024_x_at	1586.8	P	0.000244	Consensus includes gb:BG261322 /FEA=EST /DB_XREF=gi:12771138 /DB_XREF=est:602373079F1 /CLONE=IMAGE:4484563 /UG=Hs.158688 KIAA0741 gene product /FL=gb:AB018284.1 gb:AF078035.1 gb:NM_015904.1
201025_at	186.9	P	0.000244	Consensus includes gb:AB018284.1 /DEF=Homo sapiens mRNA for KIAA0741 protein, complete cds. /FEA=mRNA /GEN=KIAA0741 /PROD=KIAA0741 protein /DB_XREF=gi:3882202 /UG=Hs.158688 KIAA0741 gene product /FL=gb:AB018284.1 gb:AF078035.1 gb:NM_015904.1
201026_at	232.7	P	0.000732	Consensus includes gb:AB018284.1 /DEF=Homo sapiens mRNA for KIAA0741 protein, complete cds. /FEA=mRNA /GEN=KIAA0741 /PROD=KIAA0741 protein /DB_XREF=gi:3882202 /UG=Hs.158688 KIAA0741 gene product /FL=gb:AB018284.1 gb:AF078035.1 gb:NM_015904.1
201027_s_at	292.3	P	0.000732	gb:NM_015904.1 /DEF=Homo sapiens KIAA0741 gene product (IF2), mRNA. /FEA=mRNA /GEN=IF2 /PROD=translation initiation factor IF2 /DB_XREF=gi:7706231 /UG=Hs.158688 KIAA0741 gene product /FL=gb:AB018284.1 gb:AF078035.1 gb:NM_015904.1
201028_s_at	127.9	P	0.001221	gb:U82164.1 /DEF=Human transmembrane protein CD99 type II mRNA, complete cds. /FEA=mRNA /GEN=CD99 /PROD=CD99 typeII /DB_XREF=gi:2149134 /UG=Hs.177543 antigen identified by monoclonal antibodies 12E7, F21 and O13 /FL=gb:BC002584.1 gb:BC003147.1 gb:M16279.1 gb:U82164.1 gb:NM_002414.1
201029_s_at	453.5	P	0.000244	gb:NM_002414.1 /DEF=Homo sapiens antigen identified by monoclonal antibodies 12E7, F21 and O13 (MIC2), mRNA. /FEA=mRNA /GEN=MIC2 /PROD=antigen identified by monoclonal antibodies12E7, F21 and O13 /DB_XREF=gi:4505182 /UG=Hs.177543 antigen identified by monoclonal antibodies 12E7, F21 and O13 /FL=gb:BC002584.1 gb:BC003147.1 gb:M16279.1 gb:U82164.1 gb:NM_002414.1
201030_x_at	13.1	A	0.171387	gb:NM_002300.1 /DEF=Homo sapiens lactate dehydrogenase B (LDHB), mRNA. /FEA=mRNA /GEN=LDHB /PROD=lactate dehydrogenase B /DB_XREF=gi:4557031 /UG=Hs.234489 lactate dehydrogenase B /FL=gb:BC002362.1 gb:NM_002300.1
201031_s_at	5209.7	P	0.000244	gb:NM_005520.1 /DEF=Homo sapiens heterogeneous nuclear ribonucleoprotein H1 (H) (HNRPH1), mRNA. /FEA=mRNA /GEN=HNRPH1 /PROD=heterogeneous nuclear ribonucleoprotein H1 (H) /DB_XREF=gi:5031752 /UG=Hs.245710 heterogeneous nuclear ribonucleoprotein H1 (H) /FL=gb:BC001348.1 gb:L22009.1 gb:NM_005520.1
201032_at	561.9	P	0.000244	gb:NM_006698.1 /DEF=Homo sapiens bladder cancer associated protein (BLCAP), mRNA. /FEA=mRNA /GEN=BLCAP /PROD=bladder cancer associated protein /DB_XREF=gi:5729737 /UG=Hs.5300 bladder cancer associated protein /FL=gb:AF053470.1 gb:NM_006698.1
201033_x_at	12570.9	P	0.000244	gb:NM_001002.1 /DEF=Homo sapiens ribosomal protein, large, P0 (RPLP0), mRNA. /FEA=mRNA /GEN=RPLP0 /PROD=ribosomal protein, large, P0 /DB_XREF=gi:4506666 /UG=Hs.73742 ribosomal protein, large, P0 /FL=gb:BC000345.1 gb:BC000752.1 gb:BC001127.1 gb:AF274958.1 gb:BC001834.1 gb:M17885.1 gb:NM_001002.1
201034_at	135.6	P	0.000732	Consensus includes gb:BE545756 /FEA=EST /DB_XREF=gi:9774401 /DB_XREF=est:601076920F1 /CLONE=IMAGE:3462940 /UG=Hs.8110 L-3-hydroxyacyl-Coenzyme A dehydrogenase, short chain /FL=gb:BC000306.1 gb:NM_005327.1
201035_s_at	283.7	P	0.000244	gb:BC000306.1 /DEF=Homo sapiens, L-3-hydroxyacyl-Coenzyme A dehydrogenase, short chain, clone MGC:8392, mRNA, complete cds. /FEA=mRNA /PROD=L-3-hydroxyacyl-Coenzyme A dehydrogenase, shortchain /DB_XREF=gi:12653080 /UG=Hs.8110 L-3-hydroxyacyl-Coenzyme A dehydrogenase, short chain /FL=gb:BC000306.1 gb:NM_005327.1
201036_s_at	735.7	P	0.000244	gb:NM_005327.1 /DEF=Homo sapiens L-3-hydroxyacyl-Coenzyme A dehydrogenase, short chain (HADHSC), mRNA. /FEA=mRNA /GEN=HADHSC /PROD=L-3-hydroxyacyl-Coenzyme A dehydrogenase, shortchain /DB_XREF=gi:4885386 /UG=Hs.8110 L-3-hydroxyacyl-Coenzyme A dehydrogenase, short chain /FL=gb:BC000306.1 gb:NM_005327.1
201037_at	1441.7	P	0.000244	gb:NM_002627.1 /DEF=Homo sapiens phosphofructokinase, platelet (PFKP), mRNA. /FEA=mRNA /GEN=PFKP /PROD=phosphofructokinase, platelet /DB_XREF=gi:11321600 /UG=Hs.99910 phosphofructokinase, platelet /FL=gb:NM_002627.1 gb:BC002536.1 gb:M64784.1 gb:D25328.1
201038_s_at	501.8	P	0.000244	Consensus includes gb:T67821 /FEA=EST /DB_XREF=gi:678969 /DB_XREF=est:yc39d08.s1 /CLONE=IMAGE:83055 /UG=Hs.285013 putative human HLA class II associated protein I /FL=gb:U60823.1 gb:U73477.1 gb:AF025684.1 gb:NM_006305.1
201039_s_at	499.6	P	0.000732	Consensus includes gb:BF572938 /FEA=EST /DB_XREF=gi:11646661 /DB_XREF=est:602078949F2 /CLONE=IMAGE:4253100 /UG=Hs.180455 RAD23 (S. cerevisiae) homolog A /FL=gb:NM_005053.1 gb:D21235.1
201040_at	139.0	P	0.001221	gb:NM_002070.1 /DEF=Homo sapiens guanine nucleotide binding protein (G protein), alpha inhibiting activity polypeptide 2 (GNAI2), mRNA. /FEA=mRNA /GEN=GNAI2 /PROD=guanine nucleotide binding protein (G protein),alpha inhibiting activity polypeptide 2 /DB_XREF=gi:4504040 /UG=Hs.77269 guanine nucleotide binding protein (G protein), alpha inhibiting activity polypeptide 2 /FL=gb:J03004.1 gb:NM_002070…
201041_s_at	2168.2	P	0.000244	gb:NM_004417.2 /DEF=Homo sapiens dual specificity phosphatase 1 (DUSP1), mRNA. /FEA=mRNA /GEN=DUSP1 /PROD=dual specificity phosphatase 1 /DB_XREF=gi:7108342 /UG=Hs.171695 dual specificity phosphatase 1 /FL=gb:NM_004417.2
201042_at	32.8	A	0.219482	Consensus includes gb:AL031651 /DEF=Human DNA sequence from clone RP5-1054A22 on chromosome 20q11.22-12 Contains two isoforms of the gene for TGM2 (transglutaminase 2 (C polypeptide, protein-glutamine-gamma-glutamyltransferase), ESTs, STSs, GSSs and a CpG island /FEA=mRNA_1 /DB_XREF=gi:6065866 /UG=Hs.8265 transglutaminase 2 (C polypeptide, protein-glutamine-gamma-glutamyltransferase) /FL=gb:M5515…
201043_s_at	543.7	P	0.000244	gb:NM_006305.1 /DEF=Homo sapiens putative human HLA class II associated protein I (PHAP1), mRNA. /FEA=mRNA /GEN=PHAP1 /PROD=putative human HLA class II associated proteinI /DB_XREF=gi:5453879 /UG=Hs.285013 putative human HLA class II associated protein I /FL=gb:U60823.1 gb:U73477.1 gb:AF025684.1 gb:NM_006305.1
201044_x_at	62.4	P	0.005859	Consensus includes gb:AA530892 /FEA=EST /DB_XREF=gi:2273598 /DB_XREF=est:ni97d11.s1 /CLONE=IMAGE:984789 /UG=Hs.171695 dual specificity phosphatase 1 /FL=gb:NM_004417.2
201045_s_at	32.0	A	0.149658	Consensus includes gb:BF513857 /FEA=EST /DB_XREF=gi:11599036 /DB_XREF=est:UI-H-BW1-amz-e-01-0-UI.s1 /CLONE=IMAGE:3071689 /UG=Hs.5636 RAB6A, member RAS oncogene family /FL=gb:BC003617.1 gb:NM_002869.1 gb:AF130986.1 gb:AF130122.1 gb:M28212.1 gb:AF119836.1 gb:AF198616.1
201046_s_at	479.7	P	0.001953	gb:NM_005053.1 /DEF=Homo sapiens RAD23 (S. cerevisiae) homolog A (RAD23A), mRNA. /FEA=mRNA /GEN=RAD23A /PROD=RAD23 (S. cerevisiae) homolog A /DB_XREF=gi:4826963 /UG=Hs.180455 RAD23 (S. cerevisiae) homolog A /FL=gb:NM_005053.1 gb:D21235.1
201047_x_at	1424.4	P	0.000244	gb:BC003617.1 /DEF=Homo sapiens, RAB6, member RAS oncogene family, clone MGC:1654, mRNA, complete cds. /FEA=mRNA /PROD=RAB6, member RAS oncogene family /DB_XREF=gi:13177663 /UG=Hs.5636 RAB6A, member RAS oncogene family /FL=gb:BC003617.1 gb:NM_002869.1 gb:AF130986.1 gb:AF130122.1 gb:M28212.1 gb:AF119836.1 gb:AF198616.1
201048_x_at	41.3	A	0.274170	gb:NM_002869.1 /DEF=Homo sapiens RAB6, member RAS oncogene family (RAB6), mRNA. /FEA=mRNA /GEN=RAB6 /PROD=RAB6, member RAS oncogene family /DB_XREF=gi:4506372 /UG=Hs.5636 RAB6A, member RAS oncogene family /FL=gb:BC003617.1 gb:NM_002869.1 gb:AF130986.1 gb:AF130122.1 gb:M28212.1 gb:AF119836.1 gb:AF198616.1
201049_s_at	12396.9	P	0.000244	gb:NM_022551.1 /DEF=Homo sapiens ribosomal protein S18 (RPS18), mRNA. /FEA=mRNA /GEN=RPS18 /PROD=ribosomal protein S18 /DB_XREF=gi:11968181 /UG=Hs.275865 ribosomal protein S18 /FL=gb:NM_022551.1
201050_at	90.3	P	0.023926	gb:NM_012268.1 /DEF=Homo sapiens similar to vaccinia virus HindIII K4L ORF (HU-K4), mRNA. /FEA=mRNA /GEN=HU-K4 /PROD=similar to vaccinia virus HindIII K4L ORF /DB_XREF=gi:7110640 /UG=Hs.74573 similar to vaccinia virus HindIII K4L ORF /FL=gb:BC000553.1 gb:U60644.1 gb:NM_012268.1
201051_at	1443.8	P	0.000244	Consensus includes gb:BE560202 /FEA=EST /DB_XREF=gi:9803834 /DB_XREF=est:601347428F1 /CLONE=IMAGE:3688350 /UG=Hs.285013 putative human HLA class II associated protein I /FL=gb:U60823.1 gb:U73477.1 gb:AF025684.1 gb:NM_006305.1
201052_s_at	314.3	P	0.000244	Consensus includes gb:BG029917 /FEA=EST /DB_XREF=gi:12419014 /DB_XREF=est:602297261F1 /CLONE=IMAGE:4391534 /UG=Hs.75925 proteasome (prosome, macropain) inhibitor subunit 1 (PI31) /FL=gb:D88378.1 gb:NM_006814.1
201053_s_at	541.8	P	0.000244	gb:NM_006814.1 /DEF=Homo sapiens proteasome (prosome, macropain) inhibitor subunit 1 (PI31) (PSMF1), mRNA. /FEA=mRNA /GEN=PSMF1 /PROD=proteasome inhibitor /DB_XREF=gi:5803122 /UG=Hs.75925 proteasome (prosome, macropain) inhibitor subunit 1 (PI31) /FL=gb:D88378.1 gb:NM_006814.1
201054_at	1756.9	P	0.000244	Consensus includes gb:BE966599 /FEA=EST /DB_XREF=gi:11772191 /DB_XREF=est:601660283R1 /CLONE=IMAGE:3906044 /UG=Hs.77492 heterogeneous nuclear ribonucleoprotein A0 /FL=gb:BC001008.1 gb:NM_006805.1 gb:U23803.1
201055_s_at	1123.2	P	0.000244	gb:NM_006805.1 /DEF=Homo sapiens heterogeneous nuclear ribonucleoprotein A0 (HNRPA0), mRNA. /FEA=mRNA /GEN=HNRPA0 /PROD=heterogeneous nuclear ribonucleoprotein A0 /DB_XREF=gi:5803035 /UG=Hs.77492 heterogeneous nuclear ribonucleoprotein A0 /FL=gb:BC001008.1 gb:NM_006805.1 gb:U23803.1
201056_at	150.0	P	0.001221	Consensus includes gb:N53479 /FEA=EST /DB_XREF=gi:1194645 /DB_XREF=est:yv42c11.s1 /CLONE=IMAGE:245396 /UG=Hs.7844 golgi autoantigen, golgin subfamily b, macrogolgin (with transmembrane signal), 1 /FL=gb:NM_004487.1
201057_s_at	847.2	P	0.000244	gb:NM_004487.1 /DEF=Homo sapiens golgi autoantigen, golgin subfamily b, macrogolgin (with transmembrane signal), 1 (GOLGB1), mRNA. /FEA=mRNA /GEN=GOLGB1 /PROD=golgi autoantigen, golgin subfamily b,macrogolgin (with transmembrane signal), 1 /DB_XREF=gi:4758453 /UG=Hs.7844 golgi autoantigen, golgin subfamily b, macrogolgin (with transmembrane signal), 1 /FL=gb:NM_004487.1
201058_s_at	6.4	A	0.888428	gb:NM_006097.1 /DEF=Homo sapiens myosin regulatory light chain 2, smooth muscle isoform (MYRL2), mRNA. /FEA=mRNA /GEN=MYRL2 /PROD=myosin regulatory light chain 2, smooth muscleisoform /DB_XREF=gi:5174602 /UG=Hs.9615 myosin regulatory light chain 2, smooth muscle isoform /FL=gb:J02854.1 gb:NM_006097.1
201059_at	3313.3	P	0.001221	gb:NM_005231.1 /DEF=Homo sapiens ems1 sequence (mammary tumor and squamous cell carcinoma-associated (p8085 src substrate) (EMS1), mRNA. /FEA=mRNA /GEN=EMS1 /PROD=cortactin /DB_XREF=gi:4885204 /UG=Hs.119257 ems1 sequence (mammary tumor and squamous cell carcinoma-associated (p8085 src substrate) /FL=gb:M98343.1 gb:NM_005231.1
201060_x_at	573.2	P	0.001221	Consensus includes gb:AI537887 /FEA=EST /DB_XREF=gi:4452022 /DB_XREF=est:tp32g06.x1 /CLONE=IMAGE:2189530 /UG=Hs.160483 erythrocyte membrane protein band 7.2 (stomatin) /FL=gb:M81635.1 gb:NM_004099.1
201061_s_at	933.1	P	0.000732	gb:M81635.1 /DEF=Homo sapiens erythrocyte membrane protein mRNA, complete cds. /FEA=mRNA /GEN=stomatin peptide /PROD=stomatin peptide /DB_XREF=gi:181183 /UG=Hs.160483 erythrocyte membrane protein band 7.2 (stomatin) /FL=gb:M81635.1 gb:NM_004099.1
201062_at	0.7	A	0.625732	gb:M81635.1 /DEF=Homo sapiens erythrocyte membrane protein mRNA, complete cds. /FEA=mRNA /GEN=stomatin peptide /PROD=stomatin peptide /DB_XREF=gi:181183 /UG=Hs.160483 erythrocyte membrane protein band 7.2 (stomatin) /FL=gb:M81635.1 gb:NM_004099.1
201063_at	129.6	P	0.000244	gb:NM_002901.1 /DEF=Homo sapiens reticulocalbin 1, EF-hand calcium binding domain (RCN1), mRNA. /FEA=mRNA /GEN=RCN1 /PROD=reticulocalbin 1 precursor /DB_XREF=gi:4506454 /UG=Hs.167791 reticulocalbin 1, EF-hand calcium binding domain /FL=gb:D42073.1 gb:NM_002901.1
201064_s_at	1333.6	P	0.000244	gb:NM_003819.2 /DEF=Homo sapiens poly(A)-binding protein, cytoplasmic 4 (inducible form) (PABPC4), mRNA. /FEA=mRNA /GEN=PABPC4 /PROD=poly(A)-binding protein, cytoplasmic 4(inducible form) /DB_XREF=gi:6552335 /UG=Hs.169900 poly(A)-binding protein, cytoplasmic 4 (inducible form) /FL=gb:NM_003819.2
201065_s_at	2103.8	P	0.000244	gb:NM_001518.1 /DEF=Homo sapiens general transcription factor II, i (GTF2I), mRNA. /FEA=mRNA /GEN=GTF2I /PROD=general transcription factor II, i /DB_XREF=gi:4504202 /UG=Hs.278589 general transcription factor II, i /FL=gb:U77948.1 gb:AF015553.1 gb:AF038969.1 gb:NM_001518.1
201066_at	2582.5	P	0.004150	gb:NM_001916.1 /DEF=Homo sapiens cytochrome c-1 (CYC1), mRNA. /FEA=mRNA /GEN=CYC1 /PROD=cytochrome c-1 /DB_XREF=gi:4503184 /UG=Hs.289271 cytochrome c-1 /FL=gb:BC001006.1 gb:NM_001916.1
201067_at	322.1	P	0.001221	Consensus includes gb:BF215487 /FEA=EST /DB_XREF=gi:11109176 /DB_XREF=est:601881048F1 /CLONE=IMAGE:4093691 /UG=Hs.61153 proteasome (prosome, macropain) 26S subunit, ATPase, 2 /FL=gb:BC002589.1 gb:D11094.1 gb:NM_002803.1
201068_s_at	4064.0	P	0.000244	gb:NM_002803.1 /DEF=Homo sapiens proteasome (prosome, macropain) 26S subunit, ATPase, 2 (PSMC2), mRNA. /FEA=mRNA /GEN=PSMC2 /PROD=proteasome (prosome, macropain) 26S subunit,ATPase, 2 /DB_XREF=gi:4506208 /UG=Hs.61153 proteasome (prosome, macropain) 26S subunit, ATPase, 2 /FL=gb:BC002589.1 gb:D11094.1 gb:NM_002803.1
201069_at	29.3	P	0.008057	gb:NM_004530.1 /DEF=Homo sapiens matrix metalloproteinase 2 (gelatinase A, 72kD gelatinase, 72kD type IV collagenase) (MMP2), mRNA. /FEA=mRNA /GEN=MMP2 /PROD=matrix metalloproteinase 2 preproprotein /DB_XREF=gi:11342665 /UG=Hs.111301 matrix metalloproteinase 2 (gelatinase A, 72kD gelatinase, 72kD type IV collagenase) /FL=gb:NM_004530.1 gb:BC002576.1
201070_x_at	724.4	P	0.000244	Consensus includes gb:AI739389 /FEA=EST /DB_XREF=gi:5101370 /DB_XREF=est:wi29f09.x1 /CLONE=IMAGE:2391689 /UG=Hs.13453 splicing factor 3b, subunit 1, 155kD /FL=gb:AF054284.1 gb:NM_012433.1
201071_x_at	3076.1	P	0.000244	gb:NM_012433.1 /DEF=Homo sapiens splicing factor 3b, subunit 1, 155kD (SF3B1), mRNA. /FEA=mRNA /GEN=SF3B1 /PROD=splicing factor 3b, subunit 1, 155kD /DB_XREF=gi:6912653 /UG=Hs.13453 splicing factor 3b, subunit 1, 155kD /FL=gb:AF054284.1 gb:NM_012433.1
201072_s_at	513.7	P	0.000244	Consensus includes gb:AW152160 /FEA=EST /DB_XREF=gi:6200058 /DB_XREF=est:xf75e01.x1 /CLONE=IMAGE:2623896 /UG=Hs.172280 SWISNF related, matrix associated, actin dependent regulator of chromatin, subfamily c, member 1 /FL=gb:U66615.1 gb:NM_003074.1
201073_s_at	119.8	P	0.000732	Consensus includes gb:AL040633 /FEA=EST /DB_XREF=gi:5409580 /DB_XREF=est:DKFZp434M2414_s1 /CLONE=DKFZp434M2414 /UG=Hs.172280 SWISNF related, matrix associated, actin dependent regulator of chromatin, subfamily c, member 1 /FL=gb:U66615.1 gb:NM_003074.1
201074_at	890.7	P	0.000244	Consensus includes gb:AA593983 /FEA=EST /DB_XREF=gi:2409333 /DB_XREF=est:nn16d01.s1 /CLONE=IMAGE:1084033 /UG=Hs.172280 SWISNF related, matrix associated, actin dependent regulator of chromatin, subfamily c, member 1 /FL=gb:U66615.1 gb:NM_003074.1
201075_s_at	311.1	P	0.000244	gb:NM_003074.1 /DEF=Homo sapiens SWISNF related, matrix associated, actin dependent regulator of chromatin, subfamily c, member 1 (SMARCC1), mRNA. /FEA=mRNA /GEN=SMARCC1 /PROD=SWISNF related, matrix associated, actindependent regulator of chromatin, subfamily c, member 1 /DB_XREF=gi:4507078 /UG=Hs.172280 SWISNF related, matrix associated, actin dependent regulator of chromatin, subfamily c, membe…
201076_at	368.8	P	0.000244	gb:NM_005008.1 /DEF=Homo sapiens non-histone chromosome protein 2 (S. cerevisiae)-like 1 (NHP2L1), mRNA. /FEA=mRNA /GEN=NHP2L1 /PROD=non-histone chromosome protein 2 (S.cerevisiae)-like 1 /DB_XREF=gi:4826859 /UG=Hs.182255 non-histone chromosome protein 2 (S. cerevisiae)-like 1 /FL=gb:BC005358.1 gb:D50420.1 gb:AF091076.1 gb:NM_005008.1 gb:AF155235.1
201077_s_at	1855.1	P	0.000244	gb:AF155235.1 /DEF=Homo sapiens 15.5 kD RNA binding protein mRNA, complete cds. /FEA=mRNA /PROD=15.5 kD RNA binding protein /DB_XREF=gi:6318598 /UG=Hs.182255 non-histone chromosome protein 2 (S. cerevisiae)-like 1 /FL=gb:BC005358.1 gb:D50420.1 gb:AF091076.1 gb:NM_005008.1 gb:AF155235.1
201078_at	1608.1	P	0.000244	gb:NM_004800.1 /DEF=Homo sapiens transmembrane 9 superfamily member 2 (TM9SF2), mRNA. /FEA=mRNA /GEN=TM9SF2 /PROD=transmembrane 9 superfamily member 2 /DB_XREF=gi:4758873 /UG=Hs.28757 transmembrane 9 superfamily member 2 /FL=gb:U81006.1 gb:NM_004800.1
201079_at	1974.1	P	0.000244	gb:NM_004710.1 /DEF=Homo sapiens synaptogyrin 2 (SYNGR2), mRNA. /FEA=mRNA /GEN=SYNGR2 /PROD=synaptogyrin 2 /DB_XREF=gi:4759201 /UG=Hs.5097 synaptogyrin 2 /FL=gb:BC000407.1 gb:NM_004710.1
201080_at	88.4	P	0.001221	Consensus includes gb:BF338509 /FEA=EST /DB_XREF=gi:11284912 /DB_XREF=est:602034176F2 /CLONE=IMAGE:4182187 /UG=Hs.6335 phosphatidylinositol-4-phosphate 5-kinase, type II, beta /FL=gb:U85245.1 gb:NM_003559.1
201081_s_at	41.7	P	0.005859	gb:NM_003559.1 /DEF=Homo sapiens phosphatidylinositol-4-phosphate 5-kinase, type II, beta (PIP5K2B), mRNA. /FEA=mRNA /GEN=PIP5K2B /PROD=phosphatidylinositol-4-phosphate 5-kinase, typeII, beta /DB_XREF=gi:4505818 /UG=Hs.6335 phosphatidylinositol-4-phosphate 5-kinase, type II, beta /FL=gb:U85245.1 gb:NM_003559.1
201082_s_at	53.8	P	0.000244	gb:NM_004082.2 /DEF=Homo sapiens dynactin 1 (p150, Glued (Drosophila) homolog) (DCTN1), transcript variant 1, mRNA. /FEA=mRNA /GEN=DCTN1 /PROD=dynactin 1, isoform 1 /DB_XREF=gi:13259509 /UG=Hs.74617 dynactin 1 (p150, Glued (Drosophila) homolog) /FL=gb:NM_023019.1 gb:NM_004082.2
201083_s_at	336.6	P	0.000244	Consensus includes gb:AA740754 /FEA=EST /DB_XREF=gi:2779346 /DB_XREF=est:nz03b05.s1 /CLONE=IMAGE:1286673 /UG=Hs.80338 KIAA0164 gene product /FL=gb:D79986.1 gb:NM_014739.1
201084_s_at	2405.3	P	0.000244	gb:NM_014739.1 /DEF=Homo sapiens KIAA0164 gene product (KIAA0164), mRNA. /FEA=mRNA /GEN=KIAA0164 /PROD=KIAA0164 gene product /DB_XREF=gi:7661957 /UG=Hs.80338 KIAA0164 gene product /FL=gb:D79986.1 gb:NM_014739.1
201085_s_at	268.7	P	0.000244	Consensus includes gb:AA664291 /FEA=EST /DB_XREF=gi:2618282 /DB_XREF=est:ac08d09.s1 /CLONE=IMAGE:855857 /UG=Hs.92909 SON DNA binding protein /FL=gb:NM_003103.1
201086_x_at	1194.5	P	0.000244	gb:NM_003103.1 /DEF=Homo sapiens SON DNA binding protein (SON), mRNA. /FEA=mRNA /GEN=SON /PROD=SON DNA binding protein /DB_XREF=gi:4507152 /UG=Hs.92909 SON DNA binding protein /FL=gb:NM_003103.1
201087_at	287.3	P	0.001221	gb:NM_002859.1 /DEF=Homo sapiens paxillin (PXN), mRNA. /FEA=mRNA /GEN=PXN /PROD=paxillin /DB_XREF=gi:4506344 /UG=Hs.102497 paxillin /FL=gb:NM_002859.1 gb:U14588.1
201088_at	3876.9	P	0.000244	gb:NM_002266.1 /DEF=Homo sapiens karyopherin alpha 2 (RAG cohort 1, importin alpha 1) (KPNA2), mRNA. /FEA=mRNA /GEN=KPNA2 /PROD=karyopherin alpha 2 /DB_XREF=gi:4504896 /UG=Hs.159557 karyopherin alpha 2 (RAG cohort 1, importin alpha 1) /FL=gb:NM_002266.1 gb:U09559.1 gb:U28386.1
201089_at	276.6	P	0.000732	gb:NM_001693.1 /DEF=Homo sapiens ATPase, H+ transporting, lysosomal (vacuolar proton pump), beta polypeptide, 5658kD, isoform 2 (ATP6B2), mRNA. /FEA=mRNA /GEN=ATP6B2 /PROD=ATPase, H+ transporting, lysosomal (vacuolarproton pump), beta polypeptide, 5658kD, isoform 2 /DB_XREF=gi:4502310 /UG=Hs.1697 ATPase, H+ transporting, lysosomal (vacuolar proton pump), beta polypeptide, 5658kD, isoform 2 /FL=gb…
201090_x_at	9062.0	P	0.023926	gb:NM_006082.1 /DEF=Homo sapiens tubulin, alpha, ubiquitous (K-ALPHA-1), mRNA. /FEA=mRNA /GEN=K-ALPHA-1 /PROD=tubulin, alpha, ubiquitous /DB_XREF=gi:5174476 /UG=Hs.278242 tubulin, alpha, ubiquitous /FL=gb:BC000696.1 gb:BC001128.1 gb:BC001209.1 gb:K00558.1 gb:AF081484.1 gb:NM_006082.1
201091_s_at	1630.2	P	0.000244	Consensus includes gb:BE748755 /FEA=EST /DB_XREF=gi:10162747 /DB_XREF=est:601571933T1 /CLONE=IMAGE:3838737 /UG=Hs.278554 heterochromatin-like protein 1 /FL=gb:AF136630.1 gb:NM_016587.1
201092_at	1902.8	P	0.000244	gb:NM_002893.2 /DEF=Homo sapiens retinoblastoma-binding protein 7 (RBBP7), mRNA. /FEA=mRNA /GEN=RBBP7 /PROD=retinoblastoma-binding protein 7 /DB_XREF=gi:13259504 /UG=Hs.31314 retinoblastoma-binding protein 7 /FL=gb:U35143.1 gb:NM_002893.2
201093_x_at	1459.0	P	0.000244	gb:NM_004168.1 /DEF=Homo sapiens succinate dehydrogenase complex, subunit A, flavoprotein (Fp) (SDHA), nuclear gene encoding mitochondrial protein, mRNA. /FEA=mRNA /GEN=SDHA /PROD=succinate dehydrogenase complex, subunit A,flavoprotein precursor /DB_XREF=gi:4759079 /UG=Hs.469 succinate dehydrogenase complex, subunit A, flavoprotein (Fp) /FL=gb:BC001380.1 gb:L21936.1 gb:NM_004168.1 gb:D30648.1
201094_at	12670.7	P	0.000244	gb:NM_001032.1 /DEF=Homo sapiens ribosomal protein S29 (RPS29), mRNA. /FEA=mRNA /GEN=RPS29 /PROD=ribosomal protein S29 /DB_XREF=gi:4506716 /UG=Hs.539 ribosomal protein S29 /FL=gb:L31610.1 gb:NM_001032.1 gb:U14973.1
201095_at	461.1	P	0.000244	gb:NM_004394.1 /DEF=Homo sapiens death-associated protein (DAP), mRNA. /FEA=mRNA /GEN=DAP /PROD=death-associated protein /DB_XREF=gi:4758119 /UG=Hs.75189 death-associated protein /FL=gb:BC002726.1 gb:NM_004394.1
201096_s_at	1372.0	P	0.000244	Consensus includes gb:AL537042 /FEA=EST /DB_XREF=gi:12800535 /DB_XREF=est:AL537042 /CLONE=CS0DF017YF17 (5 prime) /UG=Hs.75290 ADP-ribosylation factor 4 /FL=gb:BC003364.1 gb:M36341.1 gb:NM_001660.2
201097_s_at	1891.9	P	0.000244	gb:NM_001660.2 /DEF=Homo sapiens ADP-ribosylation factor 4 (ARF4), mRNA. /FEA=mRNA /GEN=ARF4 /PROD=ADP-ribosylation factor 4 /DB_XREF=gi:6995998 /UG=Hs.75290 ADP-ribosylation factor 4 /FL=gb:BC003364.1 gb:M36341.1 gb:NM_001660.2
201098_at	2043.5	P	0.000244	gb:NM_004766.1 /DEF=Homo sapiens coatomer protein complex, subunit beta 2 (beta prime) (COPB2), mRNA. /FEA=mRNA /GEN=COPB2 /PROD=coatomer protein complex, subunit beta 2 (betaprime) /DB_XREF=gi:4758031 /UG=Hs.75724 coatomer protein complex, subunit beta 2 (beta prime) /FL=gb:BC000326.1 gb:NM_004766.1
201099_at	772.4	P	0.000244	Consensus includes gb:AA824386 /FEA=EST /DB_XREF=gi:2896270 /DB_XREF=est:aj29c05.s1 /CLONE=1391720 /UG=Hs.77578 ubiquitin specific protease 9, X chromosome (Drosophila fat facets related) /FL=gb:NM_004652.2
201100_s_at	1476.5	P	0.000244	gb:NM_004652.2 /DEF=Homo sapiens ubiquitin specific protease 9, X chromosome (Drosophila fat facets related) (USP9X), transcript variant 1, mRNA. /FEA=mRNA /GEN=USP9X /PROD=Drosophila fat facets related, X-linked, isoform1 /DB_XREF=gi:11641424 /UG=Hs.77578 ubiquitin specific protease 9, X chromosome (Drosophila fat facets related) /FL=gb:NM_004652.2
201101_s_at	1418.5	P	0.000244	Consensus includes gb:BE963370 /FEA=EST /DB_XREF=gi:11766788 /DB_XREF=est:601657132R1 /CLONE=IMAGE:3866335 /UG=Hs.80338 KIAA0164 gene product /FL=gb:D79986.1 gb:NM_014739.1
201102_s_at	127.2	P	0.000244	gb:NM_002626.1 /DEF=Homo sapiens phosphofructokinase, liver (PFKL), mRNA. /FEA=mRNA /GEN=PFKL /PROD=phosphofructokinase, liver /DB_XREF=gi:4505746 /UG=Hs.155455 phosphofructokinase, liver /FL=gb:BC004920.1 gb:X15573.1 gb:NM_002626.1
201103_x_at	3867.4	P	0.000244	Consensus includes gb:BE299495 /FEA=EST /DB_XREF=gi:9183243 /DB_XREF=est:600944774T1 /CLONE=IMAGE:2960610 /UG=Hs.218329 hypothetical protein /FL=gb:NM_015383.1
201104_x_at	883.6	P	0.000244	gb:NM_015383.1 /DEF=Homo sapiens hypothetical protein (DJ328E19.C1.1), mRNA. /FEA=mRNA /GEN=DJ328E19.C1.1 /PROD=hypothetical protein /DB_XREF=gi:7657016 /UG=Hs.218329 hypothetical protein /FL=gb:NM_015383.1
201105_at	1001.7	P	0.000244	gb:NM_002305.2 /DEF=Homo sapiens lectin, galactoside-binding, soluble, 1 (galectin 1) (LGALS1), mRNA. /FEA=mRNA /GEN=LGALS1 /PROD=beta-galactosidase binding lectin precursor /DB_XREF=gi:6006015 /UG=Hs.227751 lectin, galactoside-binding, soluble, 1 (galectin 1) /FL=gb:BC001693.1 gb:J04456.1 gb:NM_002305.2
201106_at	2334.9	P	0.000244	gb:NM_002085.1 /DEF=Homo sapiens glutathione peroxidase 4 (phospholipid hydroperoxidase) (GPX4), mRNA. /FEA=mRNA /GEN=GPX4 /PROD=glutathione peroxidase 4 /DB_XREF=gi:4504106 /UG=Hs.2706 glutathione peroxidase 4 (phospholipid hydroperoxidase) /FL=gb:NM_002085.1
201107_s_at	2.0	A	0.828613	Consensus includes gb:AI812030 /FEA=EST /DB_XREF=gi:5398596 /DB_XREF=est:tw46c12.x1 /CLONE=IMAGE:2262742 /UG=Hs.87409 thrombospondin 1 /FL=gb:NM_003246.1
201108_s_at	212.4	P	0.000732	Consensus includes gb:BF055462 /FEA=EST /DB_XREF=gi:10809358 /DB_XREF=est:7j80e06.x1 /CLONE=IMAGE:3392770 /UG=Hs.87409 thrombospondin 1 /FL=gb:NM_003246.1
201109_s_at	371.9	P	0.000244	Consensus includes gb:AV726673 /FEA=EST /DB_XREF=gi:10836094 /DB_XREF=est:AV726673 /CLONE=HTCBGC12 /UG=Hs.87409 thrombospondin 1 /FL=gb:NM_003246.1
201110_s_at	1364.3	P	0.000244	gb:NM_003246.1 /DEF=Homo sapiens thrombospondin 1 (THBS1), mRNA. /FEA=mRNA /GEN=THBS1 /PROD=thrombospondin 1 /DB_XREF=gi:4507484 /UG=Hs.87409 thrombospondin 1 /FL=gb:NM_003246.1
201111_at	794.2	P	0.000244	gb:AF053641.1 /DEF=Homo sapiens brain cellular apoptosis susceptibility protein (CSE1) mRNA, complete cds. /FEA=mRNA /GEN=CSE1 /PROD=cellular apoptosis susceptibility protein /DB_XREF=gi:3560556 /UG=Hs.90073 chromosome segregation 1 (yeast homolog)-like /FL=gb:U33286.1 gb:AF053641.1 gb:NM_001316.1
201112_s_at	2155.1	P	0.000244	gb:NM_001316.1 /DEF=Homo sapiens chromosome segregation 1 (yeast homolog)-like (CSE1L), mRNA. /FEA=mRNA /GEN=CSE1L /PROD=chromosome segregation 1 (yeast homolog)-like /DB_XREF=gi:4503072 /UG=Hs.90073 chromosome segregation 1 (yeast homolog)-like /FL=gb:U33286.1 gb:AF053641.1 gb:NM_001316.1
201113_at	2085.9	P	0.000244	gb:NM_003321.1 /DEF=Homo sapiens Tu translation elongation factor, mitochondrial (TUFM), mRNA. /FEA=mRNA /GEN=TUFM /PROD=Tu translation elongation factor, mitochondrial /DB_XREF=gi:4507732 /UG=Hs.12084 Tu translation elongation factor, mitochondrial /FL=gb:BC001633.1 gb:NM_003321.1 gb:L38995.1
201114_x_at	6911.2	P	0.000244	gb:NM_002792.1 /DEF=Homo sapiens proteasome (prosome, macropain) subunit, alpha type, 7 (PSMA7), mRNA. /FEA=mRNA /GEN=PSMA7 /PROD=proteasome (prosome, macropain) subunit, alphatype, 7 /DB_XREF=gi:4506188 /UG=Hs.233952 proteasome (prosome, macropain) subunit, alpha type, 7 /FL=gb:BC004427.1 gb:AF022815.1 gb:AF054185.1 gb:NM_002792.1
201115_at	340.6	P	0.000732	gb:NM_006230.1 /DEF=Homo sapiens polymerase (DNA directed), delta 2, regulatory subunit (50kD) (POLD2), mRNA. /FEA=mRNA /GEN=POLD2 /PROD=polymerase (DNA directed), delta 2, regulatorysubunit (50kD) /DB_XREF=gi:5453923 /UG=Hs.74598 polymerase (DNA directed), delta 2, regulatory subunit (50kD) /FL=gb:U21090.1 gb:BC000459.1 gb:NM_006230.1
201116_s_at	219.8	P	0.018555	Consensus includes gb:AI922855 /FEA=EST /DB_XREF=gi:5658819 /DB_XREF=est:wo14h05.x1 /CLONE=IMAGE:2455353 /UG=Hs.75360 carboxypeptidase E /FL=gb:NM_001873.1
201117_s_at	160.5	P	0.000732	gb:NM_001873.1 /DEF=Homo sapiens carboxypeptidase E (CPE), mRNA. /FEA=mRNA /GEN=CPE /PROD=carboxypeptidase E precursor /DB_XREF=gi:4503008 /UG=Hs.75360 carboxypeptidase E /FL=gb:NM_001873.1
201118_at	2698.6	P	0.000244	gb:NM_002631.1 /DEF=Homo sapiens phosphogluconate dehydrogenase (PGD), mRNA. /FEA=mRNA /GEN=PGD /PROD=phosphogluconate dehydrogenase /DB_XREF=gi:4505758 /UG=Hs.75888 phosphogluconate dehydrogenase /FL=gb:BC000368.1 gb:NM_002631.1 gb:U30255.1
201119_s_at	4437.8	P	0.000244	gb:NM_004074.1 /DEF=Homo sapiens cytochrome c oxidase subunit VIII (COX8), nuclear gene encoding mitochondrial protein, mRNA. /FEA=mRNA /GEN=COX8 /PROD=cytochrome c oxidase subunit VIII /DB_XREF=gi:4758043 /UG=Hs.81097 cytochrome c oxidase subunit VIII /FL=gb:NM_004074.1
201120_s_at	1569.9	P	0.000732	Consensus includes gb:AL547946 /FEA=EST /DB_XREF=gi:12882489 /DB_XREF=est:AL547946 /CLONE=CS0DI035YB22 (5 prime) /UG=Hs.90061 progesterone binding protein /FL=gb:NM_006667.2
201121_s_at	2608.2	P	0.000244	gb:NM_006667.2 /DEF=Homo sapiens progesterone binding protein (HPR6.6), mRNA. /FEA=mRNA /GEN=HPR6.6 /PROD=progesterone binding protein /DB_XREF=gi:6857798 /UG=Hs.90061 progesterone binding protein /FL=gb:NM_006667.2
201122_x_at	1064.0	P	0.002930	gb:BC000751.1 /DEF=Homo sapiens, eukaryotic translation initiation factor 5A, clone MGC:2453, mRNA, complete cds. /FEA=mRNA /PROD=eukaryotic translation initiation factor 5A /DB_XREF=gi:12653914 /UG=Hs.119140 eukaryotic translation initiation factor 5A /FL=gb:BC000751.1 gb:BC001832.1 gb:M23419.1 gb:NM_001970.1
201123_s_at	2868.6	P	0.000244	gb:NM_001970.1 /DEF=Homo sapiens eukaryotic translation initiation factor 5A (EIF5A), mRNA. /FEA=mRNA /GEN=EIF5A /PROD=eukaryotic translation initiation factor 5A /DB_XREF=gi:4503544 /UG=Hs.119140 eukaryotic translation initiation factor 5A /FL=gb:BC000751.1 gb:BC001832.1 gb:M23419.1 gb:NM_001970.1
201124_at	80.9	P	0.000244	Consensus includes gb:AL048423 /FEA=EST /DB_XREF=gi:5936493 /DB_XREF=est:DKFZp586H2324_s1 /CLONE=DKFZp586H2324 /UG=Hs.149846 integrin, beta 5 /FL=gb:M35011.1 gb:J05633.1 gb:NM_002213.1
201125_s_at	1025.4	P	0.000244	gb:NM_002213.1 /DEF=Homo sapiens integrin, beta 5 (ITGB5), mRNA. /FEA=mRNA /GEN=ITGB5 /PROD=integrin, beta 5 /DB_XREF=gi:4504772 /UG=Hs.149846 integrin, beta 5 /FL=gb:M35011.1 gb:J05633.1 gb:NM_002213.1
201126_s_at	223.1	P	0.000244	gb:NM_002406.2 /DEF=Homo sapiens mannosyl (alpha-1,3-)-glycoprotein beta-1,2-N-acetylglucosaminyltransferase (MGAT1), mRNA. /FEA=mRNA /GEN=MGAT1 /PROD=mannosyl (alpha-1,3-)-glycoproteinbeta-1,2-N-acetylglucosaminyltransferase /DB_XREF=gi:6031182 /UG=Hs.151513 mannosyl (alpha-1,3-)-glycoprotein beta-1,2-N-acetylglucosaminyltransferase /FL=gb:M55621.1 gb:NM_002406.2
201127_s_at	169.2	P	0.004150	Consensus includes gb:AI971281 /FEA=EST /DB_XREF=gi:5768107 /DB_XREF=est:wr27d10.x1 /CLONE=IMAGE:2488915 /UG=Hs.174140 ATP citrate lyase /FL=gb:NM_001096.1
201128_s_at	1482.5	P	0.000244	gb:NM_001096.1 /DEF=Homo sapiens ATP citrate lyase (ACLY), mRNA. /FEA=mRNA /GEN=ACLY /PROD=ATP citrate lyase /DB_XREF=gi:4501864 /UG=Hs.174140 ATP citrate lyase /FL=gb:NM_001096.1
201129_at	450.9	P	0.000244	gb:NM_006276.2 /DEF=Homo sapiens splicing factor, arginineserine-rich 7 (35kD) (SFRS7), mRNA. /FEA=mRNA /GEN=SFRS7 /PROD=splicing factor, arginineserine-rich 7 (35kD) /DB_XREF=gi:6857827 /UG=Hs.184167 splicing factor, arginineserine-rich 7 (35kD) /FL=gb:BC000997.2 gb:L22253.1 gb:NM_006276.2
201130_s_at	25.7	P	0.000732	gb:L08599.1 /DEF=Human uvomorulin (E-cadherin) (UVO) mRNA, complete cds. /FEA=mRNA /GEN=UVO /PROD=uvomorulin /DB_XREF=gi:340184 /UG=Hs.194657 cadherin 1, type 1, E-cadherin (epithelial) /FL=gb:L08599.1 gb:NM_004360.1
201131_s_at	5712.7	P	0.000244	gb:NM_004360.1 /DEF=Homo sapiens cadherin 1, type 1, E-cadherin (epithelial) (CDH1), mRNA. /FEA=mRNA /GEN=CDH1 /PROD=cadherin 1, type 1, E-cadherin (epithelial) /DB_XREF=gi:4757959 /UG=Hs.194657 cadherin 1, type 1, E-cadherin (epithelial) /FL=gb:L08599.1 gb:NM_004360.1
201132_at	1883.5	P	0.000244	gb:NM_019597.1 /DEF=Homo sapiens heterogeneous nuclear ribonucleoprotein H2 (H) (HNRPH2), mRNA. /FEA=mRNA /GEN=HNRPH2 /PROD=heterogeneous nuclear ribonucleoprotein H2 (H) /DB_XREF=gi:9624997 /UG=Hs.278857 heterogeneous nuclear ribonucleoprotein H2 (H) /FL=gb:NM_019597.1
201133_s_at	540.2	P	0.000244	Consensus includes gb:AA142966 /FEA=EST /DB_XREF=gi:1712344 /DB_XREF=est:zl43b05.s1 /CLONE=IMAGE:504657 /UG=Hs.279849 KIAA0438 gene product /FL=gb:AB007898.1 gb:NM_014819.1
201134_x_at	8257.4	P	0.000244	gb:NM_001867.1 /DEF=Homo sapiens cytochrome c oxidase subunit VIIc (COX7C), mRNA. /FEA=mRNA /GEN=COX7C /PROD=cytochrome c oxidase subunit VIIc /DB_XREF=gi:4502992 /UG=Hs.3462 cytochrome c oxidase subunit VIIc /FL=gb:BC001005.1 gb:NM_001867.1
201135_at	3056.1	P	0.000244	gb:NM_004092.2 /DEF=Homo sapiens enoyl Coenzyme A hydratase, short chain, 1, mitochondrial (ECHS1), nuclear gene encoding mitochondrial protein, mRNA. /FEA=mRNA /GEN=ECHS1 /PROD=mitochondrial short-chain enoyl-coenzyme Ahydratase 1 precursor /DB_XREF=gi:12707569 /UG=Hs.76394 enoyl Coenzyme A hydratase, short chain, 1, mitochondrial /FL=gb:NM_004092.2 gb:D13900.1
201136_at	504.3	P	0.000244	gb:NM_002668.1 /DEF=Homo sapiens proteolipid protein 2 (colonic epithelium-enriched) (PLP2), mRNA. /FEA=mRNA /GEN=PLP2 /PROD=proteolipid protein 2 (colonicepithelium-enriched) /DB_XREF=gi:4505892 /UG=Hs.77422 proteolipid protein 2 (colonic epithelium-enriched) /FL=gb:L09604.1 gb:NM_002668.1
201137_s_at	25.3	A	0.194580	gb:NM_002121.1 /DEF=Homo sapiens major histocompatibility complex, class II, DP beta 1 (HLA-DPB1), mRNA. /FEA=mRNA /GEN=HLA-DPB1 /PROD=major histocompatibility complex, class II, DPbeta 1 /DB_XREF=gi:4504404 /UG=Hs.814 major histocompatibility complex, class II, DP beta 1 /FL=gb:J03041.1 gb:M57466.1 gb:M83664.1 gb:NM_002121.1 gb:M28200.1 gb:M28202.1
201138_s_at	1478.5	P	0.000244	Consensus includes gb:BG532929 /FEA=EST /DB_XREF=gi:13524468 /DB_XREF=est:602580582F1 /CLONE=IMAGE:4718180 /UG=Hs.83715 Sjogren syndrome antigen B (autoantigen La) /FL=gb:NM_003142.1 gb:BC001289.1 gb:J04205.1
201139_s_at	1153.7	P	0.000244	gb:NM_003142.1 /DEF=Homo sapiens Sjogren syndrome antigen B (autoantigen La) (SSB), mRNA. /FEA=mRNA /GEN=SSB /PROD=autoantigen La /DB_XREF=gi:10835066 /UG=Hs.83715 Sjogren syndrome antigen B (autoantigen La) /FL=gb:NM_003142.1 gb:BC001289.1 gb:J04205.1
201140_s_at	235.6	P	0.000244	gb:NM_004583.1 /DEF=Homo sapiens RAB5C, member RAS oncogene family (RAB5C), mRNA. /FEA=mRNA /GEN=RAB5C /PROD=RAB5C, member RAS oncogene family /DB_XREF=gi:4759019 /UG=Hs.479 RAB5C, member RAS oncogene family /FL=gb:NM_004583.1 gb:U11293.1 gb:U18420.1 gb:AF141304.1
201141_at	34.3	P	0.001221	gb:NM_002510.1 /DEF=Homo sapiens glycoprotein (transmembrane) nmb (GPNMB), mRNA. /FEA=mRNA /GEN=GPNMB /PROD=glycoprotein (transmembrane) nmb /DB_XREF=gi:4505404 /UG=Hs.82226 glycoprotein (transmembrane) nmb /FL=gb:AF322909.1 gb:NM_002510.1
201142_at	1499.1	P	0.000244	Consensus includes gb:AA577698 /FEA=EST /DB_XREF=gi:2355882 /DB_XREF=est:nn22h05.s1 /CLONE=IMAGE:1084665 /UG=Hs.151777 eukaryotic translation initiation factor 2, subunit 1 (alpha, 35kD ) /FL=gb:BC002513.1 gb:J02645.1 gb:NM_004094.1
201143_s_at	1236.5	P	0.000244	gb:BC002513.1 /DEF=Homo sapiens, eukaryotic translation initiation factor 2, subunit 1 (alpha, 35kD ), clone MGC:1511, mRNA, complete cds. /FEA=mRNA /PROD=eukaryotic translation initiation factor 2,subunit 1 (alpha, 35kD ) /DB_XREF=gi:12803384 /UG=Hs.151777 eukaryotic translation initiation factor 2, subunit 1 (alpha, 35kD ) /FL=gb:BC002513.1 gb:J02645.1 gb:NM_004094.1
201144_s_at	2452.4	P	0.000244	gb:NM_004094.1 /DEF=Homo sapiens eukaryotic translation initiation factor 2, subunit 1 (alpha, 35kD ) (EIF2S1), mRNA. /FEA=mRNA /GEN=EIF2S1 /PROD=eukaryotic translation initiation factor 2,subunit 1 (alpha, 35kD ) /DB_XREF=gi:4758255 /UG=Hs.151777 eukaryotic translation initiation factor 2, subunit 1 (alpha, 35kD ) /FL=gb:BC002513.1 gb:J02645.1 gb:NM_004094.1
201145_at	1288.8	P	0.000244	gb:NM_006118.2 /DEF=Homo sapiens HS1 binding protein (HAX1), mRNA. /FEA=mRNA /GEN=HAX1 /PROD=HS1 binding protein /DB_XREF=gi:13435355 /UG=Hs.15318 HS1 binding protein /FL=gb:NM_006118.2 gb:BC005240.1 gb:U68566.1
201146_at	1751.2	P	0.000244	gb:NM_006164.1 /DEF=Homo sapiens nuclear factor (erythroid-derived 2)-like 2 (NFE2L2), mRNA. /FEA=mRNA /GEN=NFE2L2 /PROD=nuclear factor (erythroid-derived 2)-like 2 /DB_XREF=gi:5453775 /UG=Hs.155396 nuclear factor (erythroid-derived 2)-like 2 /FL=gb:NM_006164.1
201147_s_at	342.9	P	0.000244	Consensus includes gb:BF347089 /FEA=EST /DB_XREF=gi:11294684 /DB_XREF=est:602020842F1 /CLONE=IMAGE:4156354 /UG=Hs.245188 tissue inhibitor of metalloproteinase 3 (Sorsby fundus dystrophy, pseudoinflammatory) /FL=gb:U67195.1 gb:U02571.1 gb:U14394.1 gb:NM_000362.2
201148_s_at	203.6	P	0.005859	Consensus includes gb:AW338933 /FEA=EST /DB_XREF=gi:6835559 /DB_XREF=est:ha68g07.x1 /CLONE=IMAGE:2878908 /UG=Hs.245188 tissue inhibitor of metalloproteinase 3 (Sorsby fundus dystrophy, pseudoinflammatory) /FL=gb:U67195.1 gb:U02571.1 gb:U14394.1 gb:NM_000362.2
201149_s_at	424.7	P	0.000244	gb:U67195.1 /DEF=Human tissue inhibitor of metalloproteinase-3 mRNA, complete cds. /FEA=mRNA /PROD=tissue inhibitor of metalloproteinase-3 /DB_XREF=gi:1519557 /UG=Hs.245188 tissue inhibitor of metalloproteinase 3 (Sorsby fundus dystrophy, pseudoinflammatory) /FL=gb:U67195.1 gb:U02571.1 gb:U14394.1 gb:NM_000362.2
201150_s_at	682.0	P	0.000244	gb:NM_000362.2 /DEF=Homo sapiens tissue inhibitor of metalloproteinase 3 (Sorsby fundus dystrophy, pseudoinflammatory) (TIMP3), mRNA. /FEA=mRNA /GEN=TIMP3 /PROD=tissue inhibitor of metalloproteinase 3precursor /DB_XREF=gi:9257248 /UG=Hs.245188 tissue inhibitor of metalloproteinase 3 (Sorsby fundus dystrophy, pseudoinflammatory) /FL=gb:U67195.1 gb:U02571.1 gb:U14394.1 gb:NM_000362.2
201151_s_at	247.3	P	0.000244	Consensus includes gb:BF512200 /FEA=EST /DB_XREF=gi:11597379 /DB_XREF=est:UI-H-BI3-alq-d-11-0-UI.s1 /CLONE=IMAGE:3068228 /UG=Hs.28578 muscleblind (Drosophila)-like /FL=gb:NM_021038.1 gb:AB007888.1
201152_s_at	1021.6	P	0.000244	Consensus includes gb:N31913 /FEA=EST /DB_XREF=gi:1152312 /DB_XREF=est:yy21f10.s1 /CLONE=IMAGE:271915 /UG=Hs.28578 muscleblind (Drosophila)-like /FL=gb:NM_021038.1 gb:AB007888.1
201153_s_at	525.6	P	0.000244	gb:NM_021038.1 /DEF=Homo sapiens muscleblind (Drosophila)-like (MBNL), mRNA. /FEA=mRNA /GEN=MBNL /PROD=muscleblind (Drosophila)-like /DB_XREF=gi:10518339 /UG=Hs.28578 muscleblind (Drosophila)-like /FL=gb:NM_021038.1 gb:AB007888.1
201154_x_at	8656.5	P	0.000244	gb:NM_000968.1 /DEF=Homo sapiens ribosomal protein L4 (RPL4), mRNA. /FEA=mRNA /GEN=RPL4 /PROD=ribosomal protein L4 /DB_XREF=gi:4506652 /UG=Hs.286 ribosomal protein L4 /FL=gb:BC001365.1 gb:L20868.1 gb:D23660.1 gb:NM_000968.1
201155_s_at	374.7	P	0.001953	gb:NM_014874.1 /DEF=Homo sapiens KIAA0214 gene product (KIAA0214), mRNA. /FEA=mRNA /GEN=KIAA0214 /PROD=KIAA0214 gene product /DB_XREF=gi:7662003 /UG=Hs.3363 KIAA0214 gene product /FL=gb:D86987.1 gb:AF036536.1 gb:NM_014874.1
201156_s_at	325.6	P	0.000244	Consensus includes gb:AF141304.1 /DEF=Homo sapiens small GTPase (RAB5C) mRNA, complete cds. /FEA=CDS /GEN=RAB5C /PROD=small GTPase /DB_XREF=gi:7672664 /UG=Hs.479 RAB5C, member RAS oncogene family /FL=gb:NM_004583.1 gb:U11293.1 gb:U18420.1 gb:AF141304.1
201157_s_at	528.8	P	0.000244	Consensus includes gb:AF020500.1 /DEF=Homo sapiens myristoyl CoA:protein N-myristoyltransferase mRNA, complete cds. /FEA=CDS /PROD=myristoyl CoA:protein N-myristoyltransferase /DB_XREF=gi:2760893 /UG=Hs.111039 N-myristoyltransferase 1 /FL=gb:NM_021079.1 gb:AF020500.1 gb:AF043324.1
201158_at	225.2	P	0.000732	Consensus includes gb:AI570834 /FEA=EST /DB_XREF=gi:4534208 /DB_XREF=est:tr67g09.x1 /CLONE=IMAGE:2223424 /UG=Hs.111039 N-myristoyltransferase 1 /FL=gb:NM_021079.1 gb:AF020500.1 gb:AF043324.1
201159_s_at	5.2	A	0.780518	gb:NM_021079.1 /DEF=Homo sapiens N-myristoyltransferase 1 (NMT1), mRNA. /FEA=mRNA /GEN=NMT1 /PROD=N-myristoyltransferase 1 /DB_XREF=gi:10835072 /UG=Hs.111039 N-myristoyltransferase 1 /FL=gb:NM_021079.1 gb:AF020500.1 gb:AF043324.1
201160_s_at	3299.4	P	0.000244	Consensus includes gb:AL556190 /FEA=EST /DB_XREF=gi:12898634 /DB_XREF=est:AL556190 /CLONE=CS0DK011YH09 (5 prime) /UG=Hs.1139 cold shock domain protein A /FL=gb:NM_003651.1
201161_s_at	1124.5	P	0.000244	gb:NM_003651.1 /DEF=Homo sapiens cold shock domain protein A (CSDA), mRNA. /FEA=mRNA /GEN=CSDA /PROD=cold shock domain protein A /DB_XREF=gi:4503070 /UG=Hs.1139 cold shock domain protein A /FL=gb:NM_003651.1
201162_at	5.0	A	0.919434	gb:NM_001553.1 /DEF=Homo sapiens insulin-like growth factor binding protein 7 (IGFBP7), mRNA. /FEA=mRNA /GEN=IGFBP7 /PROD=insulin-like growth factor binding protein 7 /DB_XREF=gi:4504618 /UG=Hs.119206 insulin-like growth factor binding protein 7 /FL=gb:L19182.1 gb:NM_001553.1
201163_s_at	1.3	A	0.466064	gb:NM_001553.1 /DEF=Homo sapiens insulin-like growth factor binding protein 7 (IGFBP7), mRNA. /FEA=mRNA /GEN=IGFBP7 /PROD=insulin-like growth factor binding protein 7 /DB_XREF=gi:4504618 /UG=Hs.119206 insulin-like growth factor binding protein 7 /FL=gb:L19182.1 gb:NM_001553.1
201164_s_at	823.5	P	0.000244	Consensus includes gb:BG474429 /FEA=EST /DB_XREF=gi:13406706 /DB_XREF=est:602517152F1 /CLONE=IMAGE:4648765 /UG=Hs.153834 pumilio (Drosophila) homolog 1 /FL=gb:AF315592.1 gb:NM_014676.1
201165_s_at	696.9	P	0.000244	Consensus includes gb:BE670915 /FEA=EST /DB_XREF=gi:10031456 /DB_XREF=est:7e43a09.x1 /CLONE=IMAGE:3285208 /UG=Hs.153834 pumilio (Drosophila) homolog 1 /FL=gb:AF315592.1 gb:NM_014676.1
201166_s_at	2004.0	P	0.000244	gb:NM_014676.1 /DEF=Homo sapiens pumilio (Drosophila) homolog 1 (PUM1), mRNA. /FEA=mRNA /GEN=PUM1 /PROD=pumilio (Drosophila) homolog 1 /DB_XREF=gi:13491165 /UG=Hs.153834 pumilio (Drosophila) homolog 1 /FL=gb:AF315592.1 gb:NM_014676.1
201167_x_at	39.3	A	0.149658	gb:D13989.1 /DEF=Human rho GDI mRNA, complete cds. /FEA=mRNA /PROD=human rho GDI /DB_XREF=gi:285978 /UG=Hs.159161 Rho GDP dissociation inhibitor (GDI) alpha /FL=gb:D13989.1 gb:M97579.1 gb:NM_004309.1
201168_x_at	127.3	P	0.001221	gb:NM_004309.1 /DEF=Homo sapiens Rho GDP dissociation inhibitor (GDI) alpha (ARHGDIA), mRNA. /FEA=mRNA /GEN=ARHGDIA /PROD=Rho GDP dissociation inhibitor (GDI) alpha /DB_XREF=gi:4757767 /UG=Hs.159161 Rho GDP dissociation inhibitor (GDI) alpha /FL=gb:D13989.1 gb:M97579.1 gb:NM_004309.1
201169_s_at	21.6	A	0.129639	Consensus includes gb:BG326045 /FEA=EST /DB_XREF=gi:13132482 /DB_XREF=est:602424821F1 /CLONE=IMAGE:4562789 /UG=Hs.171825 basic helix-loop-helix domain containing, class B, 2 /FL=gb:AB004066.1 gb:NM_003670.1
201170_s_at	803.9	P	0.000244	gb:NM_003670.1 /DEF=Homo sapiens basic helix-loop-helix domain containing, class B, 2 (BHLHB2), mRNA. /FEA=mRNA /GEN=BHLHB2 /PROD=differentiated embryo chondrocyte expressed gene1 /DB_XREF=gi:4503298 /UG=Hs.171825 basic helix-loop-helix domain containing, class B, 2 /FL=gb:AB004066.1 gb:NM_003670.1
201171_at	183.4	P	0.000244	Consensus includes gb:NM_003945.1 /DEF=Homo sapiens ATPase, H+ transporting, lysosomal (vacuolar proton pump) 9kD (ATP6H), mRNA. /FEA=mRNA /GEN=ATP6H /PROD=ATPase, H+ transporting, lysosomal (vacuolarproton pump) 9kD /DB_XREF=gi:4502318 /UG=Hs.24322 ATPase, H+ transporting, lysosomal (vacuolar proton pump) 9kD /FL=gb:NM_003945.1
201172_x_at	5696.5	P	0.000244	gb:NM_003945.1 /DEF=Homo sapiens ATPase, H+ transporting, lysosomal (vacuolar proton pump) 9kD (ATP6H), mRNA. /FEA=mRNA /GEN=ATP6H /PROD=ATPase, H+ transporting, lysosomal (vacuolarproton pump) 9kD /DB_XREF=gi:4502318 /UG=Hs.24322 ATPase, H+ transporting, lysosomal (vacuolar proton pump) 9kD /FL=gb:NM_003945.1
201173_x_at	1068.9	P	0.000244	gb:NM_006600.1 /DEF=Homo sapiens nuclear distribution gene C (A.nidulans) homolog (NUDC), mRNA. /FEA=mRNA /GEN=NUDC /PROD=nuclear distribution gene C (A.nidulans)homolog /DB_XREF=gi:5729952 /UG=Hs.263812 nuclear distribution gene C (A.nidulans) homolog /FL=gb:BC002399.1 gb:BC003132.1 gb:AB019408.1 gb:AF130736.1 gb:AF125465.1 gb:AF100760.1 gb:NM_006600.1
201174_s_at	1021.6	P	0.000244	gb:NM_018975.1 /DEF=Homo sapiens TRF2-interacting telomeric RAP1 protein (RAP1), mRNA. /FEA=mRNA /GEN=RAP1 /PROD=TRF2-interacting telomeric RAP1 protein /DB_XREF=gi:9507032 /UG=Hs.274428 TRF2-interacting telomeric RAP1 protein /FL=gb:BC004465.1 gb:AF262988.1 gb:NM_018975.1
201175_at	838.9	P	0.000244	gb:NM_015959.1 /DEF=Homo sapiens CGI-31 protein (LOC51075), mRNA. /FEA=mRNA /GEN=LOC51075 /PROD=CGI-31 protein /DB_XREF=gi:7705725 /UG=Hs.279861 CGI-31 protein /FL=gb:AF059753.1 gb:BC000666.1 gb:AF132965.1 gb:NM_015959.1
201176_s_at	1088.7	P	0.000244	gb:NM_001655.2 /DEF=Homo sapiens archain 1 (ARCN1), mRNA. /FEA=mRNA /GEN=ARCN1 /PROD=archain /DB_XREF=gi:11863153 /UG=Hs.33642 archain 1 /FL=gb:NM_001655.2
201177_s_at	1498.8	P	0.000244	gb:NM_005499.1 /DEF=Homo sapiens SUMO-1 activating enzyme subunit 2 (UBA2), mRNA. /FEA=mRNA /GEN=UBA2 /PROD=SUMO-1 activating enzyme subunit 2 /DB_XREF=gi:4885648 /UG=Hs.4311 SUMO-1 activating enzyme subunit 2 /FL=gb:BC003153.1 gb:U35832.1 gb:AF090384.1 gb:AF079566.1 gb:AF110957.1 gb:NM_005499.1 gb:AL136905.1
201178_at	805.3	P	0.000244	gb:NM_012179.1 /DEF=Homo sapiens F-box only protein 7 (FBXO7), mRNA. /FEA=mRNA /GEN=FBXO7 /PROD=F-box only protein 7 /DB_XREF=gi:7106310 /UG=Hs.5912 F-box only protein 7 /FL=gb:AF129537.1 gb:NM_012179.1 gb:AF233225.1
201179_s_at	435.0	P	0.001953	gb:J03005.1 /DEF=Human alternative guanine nucleotide-binding regulatory protein (G) alpha-inhibitory-subunit mRNA, complete cds. /FEA=mRNA /GEN=GNAI1 /DB_XREF=gi:183183 /UG=Hs.73799 guanine nucleotide binding protein (G protein), alpha inhibiting activity polypeptide 3 /FL=gb:J03005.1 gb:J03198.1 gb:M27543.1 gb:J03238.1 gb:NM_006496.1
201180_s_at	1347.8	P	0.000244	gb:J03198.1 /DEF=Human stimulatory G protein (of receptor-regulated K+ channels) alpha subunit mRNA, complete cds. /FEA=mRNA /DB_XREF=gi:183224 /UG=Hs.73799 guanine nucleotide binding protein (G protein), alpha inhibiting activity polypeptide 3 /FL=gb:J03005.1 gb:J03198.1 gb:M27543.1 gb:J03238.1 gb:NM_006496.1
201181_at	159.9	P	0.001221	gb:NM_006496.1 /DEF=Homo sapiens guanine nucleotide binding protein (G protein), alpha inhibiting activity polypeptide 3 (GNAI3), mRNA. /FEA=mRNA /GEN=GNAI3 /PROD=guanine nucleotide binding protein (G protein),alpha inhibiting activity polypeptide 3 /DB_XREF=gi:5729849 /UG=Hs.73799 guanine nucleotide binding protein (G protein), alpha inhibiting activity polypeptide 3 /FL=gb:J03005.1 gb:J03198.1 …
201182_s_at	460.9	P	0.000244	Consensus includes gb:AI761771 /FEA=EST /DB_XREF=gi:5177362 /DB_XREF=est:wi62b06.x1 /CLONE=IMAGE:2394803 /UG=Hs.74441 chromodomain helicase DNA binding protein 4 /FL=gb:NM_001273.1
201183_s_at	337.0	P	0.000244	Consensus includes gb:AI613273 /FEA=EST /DB_XREF=gi:4622440 /DB_XREF=est:ty35e03.x1 /CLONE=IMAGE:2281084 /UG=Hs.74441 chromodomain helicase DNA binding protein 4 /FL=gb:NM_001273.1
201184_s_at	966.9	P	0.010742	gb:NM_001273.1 /DEF=Homo sapiens chromodomain helicase DNA binding protein 4 (CHD4), mRNA. /FEA=mRNA /GEN=CHD4 /PROD=chromodomain helicase DNA binding protein 4 /DB_XREF=gi:4557452 /UG=Hs.74441 chromodomain helicase DNA binding protein 4 /FL=gb:NM_001273.1
201185_at	165.8	P	0.000732	gb:NM_002775.1 /DEF=Homo sapiens protease, serine, 11 (IGF binding) (PRSS11), mRNA. /FEA=mRNA /GEN=PRSS11 /PROD=protease, serine, 11 (IGF binding) /DB_XREF=gi:4506140 /UG=Hs.75111 protease, serine, 11 (IGF binding) /FL=gb:D87258.1 gb:NM_002775.1
201186_at	919.0	P	0.000244	gb:NM_002337.1 /DEF=Homo sapiens low density lipoprotein-related protein-associated protein 1 (alpha-2-macroglobulin receptor-associated protein 1) (LRPAP1), mRNA. /FEA=mRNA /GEN=LRPAP1 /PROD=low density lipoprotein-relatedprotein-associated protein 1 (alpha-2-macroglobulinreceptor-associated protein 1) /DB_XREF=gi:4505020 /UG=Hs.75140 low density lipoprotein-related protein-associated protein 1 …
201187_s_at	4.1	A	0.601074	Consensus includes gb:BF001241 /FEA=EST /DB_XREF=gi:10701516 /DB_XREF=est:7g96c02.x1 /CLONE=IMAGE:3314306 /UG=Hs.77515 inositol 1,4,5-triphosphate receptor, type 3 /FL=gb:D26351.1 gb:NM_002224.1 gb:U01062.1
201188_s_at	61.1	A	0.171387	gb:D26351.1 /DEF=Human mRNA for type 3 inositol 1,4,5-trisphosphate receptor, complete cds. /FEA=mRNA /PROD=human type 3 inositol 1,4,5-trisphosphatereceptor /DB_XREF=gi:450470 /UG=Hs.77515 inositol 1,4,5-triphosphate receptor, type 3 /FL=gb:D26351.1 gb:NM_002224.1 gb:U01062.1
201189_s_at	422.2	P	0.000244	gb:NM_002224.1 /DEF=Homo sapiens inositol 1,4,5-triphosphate receptor, type 3 (ITPR3), mRNA. /FEA=mRNA /GEN=ITPR3 /PROD=inositol 1,4,5-triphosphate receptor, type 3 /DB_XREF=gi:4504794 /UG=Hs.77515 inositol 1,4,5-triphosphate receptor, type 3 /FL=gb:D26351.1 gb:NM_002224.1 gb:U01062.1
201190_s_at	685.4	P	0.000244	Consensus includes gb:H15647 /FEA=EST /DB_XREF=gi:880467 /DB_XREF=est:ym27b09.s1 /CLONE=IMAGE:49287 /UG=Hs.79709 phosphotidylinositol transfer protein /FL=gb:D30036.1 gb:M73704.1 gb:NM_006224.1
201191_at	281.4	P	0.002930	Consensus includes gb:H15647 /FEA=EST /DB_XREF=gi:880467 /DB_XREF=est:ym27b09.s1 /CLONE=IMAGE:49287 /UG=Hs.79709 phosphotidylinositol transfer protein /FL=gb:D30036.1 gb:M73704.1 gb:NM_006224.1
201192_s_at	488.8	P	0.000244	gb:NM_006224.1 /DEF=Homo sapiens phosphotidylinositol transfer protein (PITPN), mRNA. /FEA=mRNA /GEN=PITPN /PROD=phosphotidylinositol transfer protein /DB_XREF=gi:5453907 /UG=Hs.79709 phosphotidylinositol transfer protein /FL=gb:D30036.1 gb:M73704.1 gb:NM_006224.1
201193_at	2820.2	P	0.000244	gb:NM_005896.1 /DEF=Homo sapiens isocitrate dehydrogenase 1 (NADP+), soluble (IDH1), mRNA. /FEA=mRNA /GEN=IDH1 /PROD=isocitrate dehydrogenase 1 (NADP+), soluble /DB_XREF=gi:5174470 /UG=Hs.11223 isocitrate dehydrogenase 1 (NADP+), soluble /FL=gb:AF020038.1 gb:AF113917.1 gb:NM_005896.1 gb:AL136702.1
201194_at	934.5	P	0.000732	gb:NM_003009.1 /DEF=Homo sapiens selenoprotein W, 1 (SEPW1), mRNA. /FEA=mRNA /GEN=SEPW1 /PROD=selenoprotein W, 1 /DB_XREF=gi:4506886 /UG=Hs.14231 selenoprotein W, 1 /FL=gb:U67171.1 gb:AF015283.1 gb:NM_003009.1
201195_s_at	421.3	P	0.000244	gb:AB018009.1 /DEF=Homo sapiens mRNA for L-type amino acid transporter 1, complete cds. /FEA=mRNA /GEN=hLAT1 /PROD=L-type amino acid transporter 1 /DB_XREF=gi:5926731 /UG=Hs.184601 solute carrier family 7 (cationic amino acid transporter, y+ system), member 5 /FL=gb:AF077866.1 gb:AB018542.1 gb:AF104032.1 gb:NM_003486.1 gb:AB017908.1 gb:AB018009.1
201196_s_at	334.4	P	0.000244	gb:M21154.1 /DEF=Human S-adenosylmethionine decarboxylase mRNA, complete cds. /FEA=mRNA /GEN=AMD2 /DB_XREF=gi:178517 /UG=Hs.262476 S-adenosylmethionine decarboxylase 1 /FL=gb:BC000171.2 gb:M21154.1 gb:NM_001634.3
201197_at	736.8	P	0.000732	gb:NM_001634.3 /DEF=Homo sapiens S-adenosylmethionine decarboxylase 1 (AMD1), mRNA. /FEA=mRNA /GEN=AMD1 /PROD=S-adenosylmethionine decarboxylase 1 precursor /DB_XREF=gi:5209326 /UG=Hs.262476 S-adenosylmethionine decarboxylase 1 /FL=gb:BC000171.2 gb:M21154.1 gb:NM_001634.3
201198_s_at	918.2	P	0.000244	Consensus includes gb:AI860431 /FEA=EST /DB_XREF=gi:5514047 /DB_XREF=est:wl13h07.x1 /CLONE=IMAGE:2424829 /UG=Hs.3887 proteasome (prosome, macropain) 26S subunit, non-ATPase, 1 /FL=gb:D44466.1 gb:NM_002807.1
201199_s_at	1066.7	P	0.000244	gb:NM_002807.1 /DEF=Homo sapiens proteasome (prosome, macropain) 26S subunit, non-ATPase, 1 (PSMD1), mRNA. /FEA=mRNA /GEN=PSMD1 /PROD=proteasome (prosome, macropain) 26S subunit,non-ATPase, 1 /DB_XREF=gi:4506224 /UG=Hs.3887 proteasome (prosome, macropain) 26S subunit, non-ATPase, 1 /FL=gb:D44466.1 gb:NM_002807.1
201200_at	1091.4	P	0.000244	gb:NM_003851.1 /DEF=Homo sapiens cellular repressor of E1A-stimulated genes (CREG), mRNA. /FEA=mRNA /GEN=CREG /PROD=cellular repressor of E1A-stimulated genes /DB_XREF=gi:4503036 /UG=Hs.5710 cellular repressor of E1A-stimulated genes /FL=gb:AF084523.1 gb:NM_003851.1
201201_at	7783.0	P	0.000244	gb:NM_000100.1 /DEF=Homo sapiens cystatin B (stefin B) (CSTB), mRNA. /FEA=mRNA /GEN=CSTB /PROD=cystatin B (stefin B) /DB_XREF=gi:4503116 /UG=Hs.695 cystatin B (stefin B) /FL=gb:BC003370.1 gb:L03558.1 gb:NM_000100.1
201202_at	1452.1	P	0.000244	gb:NM_002592.1 /DEF=Homo sapiens proliferating cell nuclear antigen (PCNA), mRNA. /FEA=mRNA /GEN=PCNA /PROD=proliferating cell nuclear antigen /DB_XREF=gi:4505640 /UG=Hs.78996 proliferating cell nuclear antigen /FL=gb:BC000491.1 gb:M15796.1 gb:NM_002592.1
201203_s_at	29.5	A	0.303711	Consensus includes gb:AI921320 /FEA=EST /DB_XREF=gi:5657284 /DB_XREF=est:wo23c10.x1 /CLONE=IMAGE:2456178 /UG=Hs.98614 ribosome binding protein 1 (dog 180kD homolog) /FL=gb:AF006751.1 gb:NM_004587.1
201204_s_at	646.6	P	0.000244	Consensus includes gb:AA706065 /FEA=EST /DB_XREF=gi:2715983 /DB_XREF=est:zf44f12.s1 /CLONE=IMAGE:379823 /UG=Hs.98614 ribosome binding protein 1 (dog 180kD homolog) /FL=gb:AF006751.1 gb:NM_004587.1
201205_at	40.2	P	0.046143	Consensus includes gb:AF006751.1 /DEF=Homo sapiens ES130 mRNA, complete cds. /FEA=mRNA /PROD=ES130 /DB_XREF=gi:3299884 /UG=Hs.98614 ribosome binding protein 1 (dog 180kD homolog) /FL=gb:AF006751.1 gb:NM_004587.1
201206_s_at	389.9	P	0.000244	gb:NM_004587.1 /DEF=Homo sapiens ribosome binding protein 1 (dog 180kD homolog) (RRBP1), mRNA. /FEA=mRNA /GEN=RRBP1 /PROD=ribosome binding protein 1 /DB_XREF=gi:4759055 /UG=Hs.98614 ribosome binding protein 1 (dog 180kD homolog) /FL=gb:AF006751.1 gb:NM_004587.1
201207_at	585.8	P	0.000244	gb:NM_021137.1 /DEF=Homo sapiens tumor necrosis factor, alpha-induced protein 1 (endothelial) (TNFAIP1), mRNA. /FEA=mRNA /GEN=TNFAIP1 /PROD=tumor necrosis factor, alpha-induced protein 1(endothelial) /DB_XREF=gi:10863936 /UG=Hs.76090 tumor necrosis factor, alpha-induced protein 1 (endothelial) /FL=gb:NM_021137.1 gb:BC001643.1 gb:BC001949.1 gb:BC003694.1 gb:M80783.1
201208_s_at	99.7	P	0.014160	gb:BC001643.1 /DEF=Homo sapiens, tumor necrosis factor, alpha-induced protein 1 (endothelial), clone MGC:2317, mRNA, complete cds. /FEA=mRNA /PROD=tumor necrosis factor, alpha-induced protein 1(endothelial) /DB_XREF=gi:12804470 /UG=Hs.76090 tumor necrosis factor, alpha-induced protein 1 (endothelial) /FL=gb:NM_021137.1 gb:BC001643.1 gb:BC001949.1 gb:BC003694.1 gb:M80783.1
201209_at	2670.1	P	0.000244	gb:NM_004964.2 /DEF=Homo sapiens histone deacetylase 1 (HDAC1), mRNA. /FEA=mRNA /GEN=HDAC1 /PROD=histone deacetylase 1 /DB_XREF=gi:13128859 /UG=Hs.88556 histone deacetylase 1 /FL=gb:BC000301.1 gb:U50079.1 gb:NM_004964.2 gb:D50405.1
201210_at	5093.6	P	0.000244	gb:NM_001356.2 /DEF=Homo sapiens DEADH (Asp-Glu-Ala-AspHis) box polypeptide 3 (DDX3), transcript variant 2, mRNA. /FEA=mRNA /GEN=DDX3 /PROD=DEADH (Asp-Glu-Ala-AspHis) box polypeptide 3 /DB_XREF=gi:13514812 /UG=Hs.147916 DEADH (Asp-Glu-Ala-AspHis) box polypeptide 3 /FL=gb:NM_001356.2 gb:U50553.1 gb:AF000982.1 gb:AF061337.1
201211_s_at	79.3	P	0.001953	gb:AF061337.1 /DEF=Homo sapiens DEAD box RNA helicase DDX3 (DDX3) mRNA, complete cds. /FEA=mRNA /GEN=DDX3 /PROD=DEAD box RNA helicase DDX3 /DB_XREF=gi:3523149 /UG=Hs.147916 DEADH (Asp-Glu-Ala-AspHis) box polypeptide 3 /FL=gb:NM_001356.2 gb:U50553.1 gb:AF000982.1 gb:AF061337.1
201212_at	282.6	P	0.002930	gb:D55696.1 /DEF=Homo sapiens mRNA for cysteine protease, complete cds. /FEA=mRNA /PROD=cysteine protease /DB_XREF=gi:1890049 /UG=Hs.18069 protease, cysteine, 1 (legumain) /FL=gb:BC003061.1 gb:D55696.1 gb:NM_005606.1
201213_at	61.1	P	0.001953	Consensus includes gb:AI090331 /FEA=EST /DB_XREF=gi:3429390 /DB_XREF=est:oy81f08.s1 /CLONE=IMAGE:1672263 /UG=Hs.36587 protein phosphatase 1, regulatory subunit 7 /FL=gb:BC000910.1 gb:NM_002712.1
201214_s_at	933.3	P	0.000244	gb:NM_002712.1 /DEF=Homo sapiens protein phosphatase 1, regulatory subunit 7 (PPP1R7), mRNA. /FEA=mRNA /GEN=PPP1R7 /PROD=protein phosphatase 1, regulatory subunit 7 /DB_XREF=gi:4506012 /UG=Hs.36587 protein phosphatase 1, regulatory subunit 7 /FL=gb:BC000910.1 gb:NM_002712.1
201215_at	15.8	P	0.037598	gb:NM_005032.2 /DEF=Homo sapiens plastin 3 (T isoform) (PLS3), mRNA. /FEA=mRNA /GEN=PLS3 /PROD=plastin 3 precursor /DB_XREF=gi:7549808 /UG=Hs.4114 plastin 3 (T isoform) /FL=gb:M22299.1 gb:NM_005032.2
201216_at	2069.9	P	0.000244	gb:NM_006817.2 /DEF=Homo sapiens endoplasmic reticulum lumenal protein (ERP28), mRNA. /FEA=mRNA /GEN=ERP28 /PROD=endoplasmic reticulum lumenal protein ERp28precursor /DB_XREF=gi:13124889 /UG=Hs.75841 endoplasmic reticulum lumenal protein /FL=gb:NM_006817.2
201217_x_at	11035.1	P	0.000244	gb:NM_000967.1 /DEF=Homo sapiens ribosomal protein L3 (RPL3), mRNA. /FEA=mRNA /GEN=RPL3 /PROD=ribosomal protein L3 /DB_XREF=gi:4506648 /UG=Hs.119598 ribosomal protein L3 /FL=gb:BC002408.1 gb:BC004323.1 gb:NM_000967.1
201218_at	2516.4	P	0.000244	Consensus includes gb:N23018 /FEA=EST /DB_XREF=gi:1137168 /DB_XREF=est:yx65d12.s1 /CLONE=IMAGE:266615 /UG=Hs.171391 C-terminal binding protein 2 /FL=gb:AF016507.1 gb:NM_001329.1
201219_at	507.7	P	0.000244	Consensus includes gb:AW269836 /FEA=EST /DB_XREF=gi:6656866 /DB_XREF=est:xv45h03.x1 /CLONE=IMAGE:2816117 /UG=Hs.171391 C-terminal binding protein 2 /FL=gb:AF016507.1 gb:NM_001329.1
201220_x_at	2618.7	P	0.000244	gb:NM_001329.1 /DEF=Homo sapiens C-terminal binding protein 2 (CTBP2), transcript variant 1, mRNA. /FEA=mRNA /GEN=CTBP2 /PROD=C-terminal binding protein 2, isoform 1 /DB_XREF=gi:4557498 /UG=Hs.171391 C-terminal binding protein 2 /FL=gb:AF016507.1 gb:NM_001329.1
201221_s_at	579.8	P	0.000244	gb:NM_003089.1 /DEF=Homo sapiens small nuclear ribonucleoprotein 70kD polypeptide (RNP antigen) (SNRP70), mRNA. /FEA=mRNA /GEN=SNRP70 /PROD=small nuclear ribonucleoprotein 70kD polypeptide(RNP antigen) /DB_XREF=gi:4507118 /UG=Hs.174051 small nuclear ribonucleoprotein 70kD polypeptide (RNP antigen) /FL=gb:BC000342.1 gb:M22636.1 gb:NM_003089.1
201222_s_at	4656.4	P	0.000244	Consensus includes gb:AL527365 /FEA=EST /DB_XREF=gi:12790858 /DB_XREF=est:AL527365 /CLONE=CS0DC021YG08 (5 prime) /UG=Hs.178658 RAD23 (S. cerevisiae) homolog B /FL=gb:NM_002874.1 gb:D21090.1
201223_s_at	1720.2	P	0.000244	gb:NM_002874.1 /DEF=Homo sapiens RAD23 (S. cerevisiae) homolog B (RAD23B), mRNA. /FEA=mRNA /GEN=RAD23B /PROD=RAD23 (S. cerevisiae) homolog B /DB_XREF=gi:4506386 /UG=Hs.178658 RAD23 (S. cerevisiae) homolog B /FL=gb:NM_002874.1 gb:D21090.1
201224_s_at	216.4	P	0.000732	Consensus includes gb:AU147713 /FEA=EST /DB_XREF=gi:11009234 /DB_XREF=est:AU147713 /CLONE=MAMMA1001474 /UG=Hs.18192 SerArg-related nuclear matrix protein (plenty of prolines 101-like) /FL=gb:AF048977.1 gb:NM_005839.1
201225_s_at	1707.7	P	0.000244	gb:NM_005839.1 /DEF=Homo sapiens SerArg-related nuclear matrix protein (plenty of prolines 101-like) (SRM160), mRNA. /FEA=mRNA /GEN=SRM160 /PROD=SerArg-related nuclear matrix protein (plentyof prolines 101-like) /DB_XREF=gi:5032118 /UG=Hs.18192 SerArg-related nuclear matrix protein (plenty of prolines 101-like) /FL=gb:AF048977.1 gb:NM_005839.1
201226_at	1778.5	P	0.000244	gb:NM_005004.1 /DEF=Homo sapiens NADH dehydrogenase (ubiquinone) 1 beta subcomplex, 8 (19kD, ASHI) (NDUFB8), mRNA. /FEA=mRNA /GEN=NDUFB8 /PROD=NADH dehydrogenase (ubiquinone) 1 betasubcomplex, 8 (19kD, ASHI) /DB_XREF=gi:4826853 /UG=Hs.198273 NADH dehydrogenase (ubiquinone) 1 beta subcomplex, 8 (19kD, ASHI) /FL=gb:BC000466.1 gb:AF044958.1 gb:AF077028.1 gb:NM_005004.1 gb:AL080056.1
201227_s_at	1652.9	P	0.000244	gb:NM_005004.1 /DEF=Homo sapiens NADH dehydrogenase (ubiquinone) 1 beta subcomplex, 8 (19kD, ASHI) (NDUFB8), mRNA. /FEA=mRNA /GEN=NDUFB8 /PROD=NADH dehydrogenase (ubiquinone) 1 betasubcomplex, 8 (19kD, ASHI) /DB_XREF=gi:4826853 /UG=Hs.198273 NADH dehydrogenase (ubiquinone) 1 beta subcomplex, 8 (19kD, ASHI) /FL=gb:BC000466.1 gb:AF044958.1 gb:AF077028.1 gb:NM_005004.1 gb:AL080056.1
201228_s_at	56.7	P	0.001221	Consensus includes gb:AW074830 /FEA=EST /DB_XREF=gi:6029828 /DB_XREF=est:xa08a08.x1 /CLONE=IMAGE:2567702 /UG=Hs.241558 ariadne (Drosophila) homolog 2 /FL=gb:BC000422.1 gb:AF099149.1 gb:NM_006321.1 gb:AF183427.1
201229_s_at	338.5	P	0.000244	gb:BC000422.1 /DEF=Homo sapiens, ariadne (Drosophila) homolog 2, clone MGC:8671, mRNA, complete cds. /FEA=mRNA /PROD=ariadne (Drosophila) homolog 2 /DB_XREF=gi:12653306 /UG=Hs.241558 ariadne (Drosophila) homolog 2 /FL=gb:BC000422.1 gb:AF099149.1 gb:NM_006321.1 gb:AF183427.1
201230_s_at	180.1	P	0.000732	gb:NM_006321.1 /DEF=Homo sapiens ariadne (Drosophila) homolog 2 (ARIH2), mRNA. /FEA=mRNA /GEN=ARIH2 /PROD=ariadne (Drosophila) homolog 2 /DB_XREF=gi:5453556 /UG=Hs.241558 ariadne (Drosophila) homolog 2 /FL=gb:BC000422.1 gb:AF099149.1 gb:NM_006321.1 gb:AF183427.1
201231_s_at	7724.6	P	0.000244	gb:NM_001428.1 /DEF=Homo sapiens enolase 1, (alpha) (ENO1), mRNA. /FEA=mRNA /GEN=ENO1 /PROD=enolase 1, (alpha) /DB_XREF=gi:4503570 /UG=Hs.254105 enolase 1, (alpha) /FL=gb:BC001810.1 gb:BC004458.1 gb:M14328.1 gb:NM_001428.1
201232_s_at	635.9	P	0.000244	gb:NM_002817.1 /DEF=Homo sapiens proteasome (prosome, macropain) 26S subunit, non-ATPase, 13 (PSMD13), mRNA. /FEA=mRNA /GEN=PSMD13 /PROD=proteasome (prosome, macropain) 26S subunit,non-ATPase, 13 /DB_XREF=gi:4506222 /UG=Hs.279554 proteasome (prosome, macropain) 26S subunit, non-ATPase, 13 /FL=gb:BC001100.1 gb:BC001747.1 gb:AB009398.1 gb:NM_002817.1 gb:AF083245.1 gb:AF107837.1
201233_at	189.3	P	0.004150	gb:NM_002817.1 /DEF=Homo sapiens proteasome (prosome, macropain) 26S subunit, non-ATPase, 13 (PSMD13), mRNA. /FEA=mRNA /GEN=PSMD13 /PROD=proteasome (prosome, macropain) 26S subunit,non-ATPase, 13 /DB_XREF=gi:4506222 /UG=Hs.279554 proteasome (prosome, macropain) 26S subunit, non-ATPase, 13 /FL=gb:BC001100.1 gb:BC001747.1 gb:AB009398.1 gb:NM_002817.1 gb:AF083245.1 gb:AF107837.1
201234_at	104.8	P	0.000732	gb:NM_004517.1 /DEF=Homo sapiens integrin-linked kinase (ILK), mRNA. /FEA=mRNA /GEN=ILK /PROD=integrin-linked kinase /DB_XREF=gi:4758605 /UG=Hs.6196 integrin-linked kinase /FL=gb:U40282.1 gb:NM_004517.1
201235_s_at	88.2	P	0.010742	Consensus includes gb:BG339064 /FEA=EST /DB_XREF=gi:13145502 /DB_XREF=est:602436889F1 /CLONE=IMAGE:4554551 /UG=Hs.75462 BTG family, member 2 /FL=gb:U72649.1 gb:NM_006763.1
201236_s_at	465.4	P	0.001953	gb:NM_006763.1 /DEF=Homo sapiens BTG family, member 2 (BTG2), mRNA. /FEA=mRNA /GEN=BTG2 /PROD=BTG family, member 2 /DB_XREF=gi:5802987 /UG=Hs.75462 BTG family, member 2 /FL=gb:U72649.1 gb:NM_006763.1
201237_at	685.7	P	0.000244	Consensus includes gb:AV685920 /FEA=EST /DB_XREF=gi:10287783 /DB_XREF=est:AV685920 /CLONE=GKCEGD05 /UG=Hs.75546 capping protein (actin filament) muscle Z-line, alpha 2 /FL=gb:BC005338.1 gb:NM_006136.1 gb:U03269.1
201238_s_at	1401.2	P	0.000244	gb:BC005338.1 /DEF=Homo sapiens, capping protein (actin filament) muscle Z-line, alpha 2, clone MGC:12426, mRNA, complete cds. /FEA=mRNA /PROD=capping protein (actin filament) muscle Z-line,alpha 2 /DB_XREF=gi:13529130 /UG=Hs.75546 capping protein (actin filament) muscle Z-line, alpha 2 /FL=gb:BC005338.1 gb:NM_006136.1 gb:U03269.1
201239_s_at	2408.3	P	0.000244	Consensus includes gb:BF530535 /FEA=EST /DB_XREF=gi:11617898 /DB_XREF=est:602071788F1 /CLONE=IMAGE:4214660 /UG=Hs.77665 KIAA0102 gene product /FL=gb:D14658.1 gb:NM_014752.1
201240_s_at	2733.5	P	0.000244	gb:NM_014752.1 /DEF=Homo sapiens KIAA0102 gene product (KIAA0102), mRNA. /FEA=mRNA /GEN=KIAA0102 /PROD=KIAA0102 gene product /DB_XREF=gi:7661907 /UG=Hs.77665 KIAA0102 gene product /FL=gb:D14658.1 gb:NM_014752.1
201241_at	1532.4	P	0.000244	gb:NM_004939.1 /DEF=Homo sapiens DEADH (Asp-Glu-Ala-AspHis) box polypeptide 1 (DDX1), mRNA. /FEA=mRNA /GEN=DDX1 /PROD=DEADH (Asp-Glu-Ala-AspHis) box polypeptide 1 /DB_XREF=gi:4826685 /UG=Hs.78580 DEADH (Asp-Glu-Ala-AspHis) box polypeptide 1 /FL=gb:X70649.1 gb:NM_004939.1
201242_s_at	4787.8	P	0.000244	gb:BC000006.1 /DEF=Homo sapiens, ATPase, Na+K+ transporting, beta 1 polypeptide, clone MGC:1798, mRNA, complete cds. /FEA=mRNA /PROD=ATPase, Na+K+ transporting, beta 1 polypeptide /DB_XREF=gi:12652534 /UG=Hs.78629 ATPase, Na+K+ transporting, beta 1 polypeptide /FL=gb:BC000006.1 gb:NM_001677.1
201243_s_at	4898.5	P	0.000244	gb:NM_001677.1 /DEF=Homo sapiens ATPase, Na+K+ transporting, beta 1 polypeptide (ATP1B1), mRNA. /FEA=mRNA /GEN=ATP1B1 /PROD=ATPase, Na+K+ transporting, beta 1 polypeptide /DB_XREF=gi:4502276 /UG=Hs.78629 ATPase, Na+K+ transporting, beta 1 polypeptide /FL=gb:BC000006.1 gb:NM_001677.1
201244_s_at	856.5	P	0.000244	gb:NM_002880.1 /DEF=Homo sapiens v-raf-1 murine leukemia viral oncogene homolog 1 (RAF1), mRNA. /FEA=mRNA /GEN=RAF1 /PROD=v-raf-1 murine leukemia viral oncogene homolog1 /DB_XREF=gi:4506400 /UG=Hs.85181 v-raf-1 murine leukemia viral oncogene homolog 1 /FL=gb:NM_002880.1
201245_s_at	601.9	P	0.000244	Consensus includes gb:AL523776 /FEA=EST /DB_XREF=gi:12787269 /DB_XREF=est:AL523776 /CLONE=CS0DC003YC23 (5 prime) /UG=Hs.108504 hypothetical protein FLJ20113 /FL=gb:NM_017670.1
201246_s_at	52.2	P	0.000244	gb:NM_017670.1 /DEF=Homo sapiens hypothetical protein FLJ20113 (FLJ20113), mRNA. /FEA=mRNA /GEN=FLJ20113 /PROD=hypothetical protein FLJ20113 /DB_XREF=gi:8923113 /UG=Hs.108504 hypothetical protein FLJ20113 /FL=gb:NM_017670.1
201247_at	15.7	A	0.274170	Consensus includes gb:BE513151 /FEA=EST /DB_XREF=gi:9720362 /DB_XREF=est:601171940F1 /CLONE=IMAGE:3545697 /UG=Hs.108689 sterol regulatory element binding transcription factor 2 /FL=gb:U02031.1 gb:NM_004599.1
201248_s_at	56.8	P	0.018555	gb:NM_004599.1 /DEF=Homo sapiens sterol regulatory element binding transcription factor 2 (SREBF2), mRNA. /FEA=mRNA /GEN=SREBF2 /PROD=sterol regulatory element binding transcriptionfactor 2 /DB_XREF=gi:4759169 /UG=Hs.108689 sterol regulatory element binding transcription factor 2 /FL=gb:U02031.1 gb:NM_004599.1
201249_at	13.3	A	0.194580	Consensus includes gb:AI091047 /FEA=EST /DB_XREF=gi:3430106 /DB_XREF=est:qa53b03.s1 /CLONE=IMAGE:1690445 /UG=Hs.169902 solute carrier family 2 (facilitated glucose transporter), member 1 /FL=gb:K03195.1 gb:NM_006516.1
201250_s_at	193.3	P	0.000244	gb:NM_006516.1 /DEF=Homo sapiens solute carrier family 2 (facilitated glucose transporter), member 1 (SLC2A1), mRNA. /FEA=mRNA /GEN=SLC2A1 /PROD=solute carrier family 2 (facilitated glucosetransporter), member 1 /DB_XREF=gi:5730050 /UG=Hs.169902 solute carrier family 2 (facilitated glucose transporter), member 1 /FL=gb:K03195.1 gb:NM_006516.1
201251_at	247.7	P	0.000732	gb:NM_002654.1 /DEF=Homo sapiens pyruvate kinase, muscle (PKM2), mRNA. /FEA=mRNA /GEN=PKM2 /PROD=pyruvate kinase, muscle /DB_XREF=gi:4505838 /UG=Hs.198281 pyruvate kinase, muscle /FL=gb:BC000481.1 gb:M23725.1 gb:M26252.1 gb:NM_002654.1
201252_at	1291.3	P	0.010742	gb:NM_006503.1 /DEF=Homo sapiens proteasome (prosome, macropain) 26S subunit, ATPase, 4 (PSMC4), mRNA. /FEA=mRNA /GEN=PSMC4 /PROD=proteasome (prosome, macropain) 26S subunit,ATPase, 4 /DB_XREF=gi:5729990 /UG=Hs.211594 proteasome (prosome, macropain) 26S subunit, ATPase, 4 /FL=gb:BC000343.1 gb:AF038965.1 gb:AF020736.1 gb:U27515.1 gb:NM_006503.1
201253_s_at	3639.1	P	0.001221	gb:NM_006319.1 /DEF=Homo sapiens CDP-diacylglycerol--inositol 3-phosphatidyltransferase (phosphatidylinositol synthase) (CDIPT), mRNA. /FEA=mRNA /GEN=CDIPT /PROD=CDP-diacylglycerol--inositol3-phosphatidyltransferase (phosphatidylinositol synthase) /DB_XREF=gi:5453905 /UG=Hs.227107 CDP-diacylglycerol--inositol 3-phosphatidyltransferase (phosphatidylinositol synthase) /FL=gb:BC001444.1 gb:AF014807.…
201254_x_at	9330.3	P	0.000732	gb:NM_001010.1 /DEF=Homo sapiens ribosomal protein S6 (RPS6), mRNA. /FEA=mRNA /GEN=RPS6 /PROD=ribosomal protein S6 /DB_XREF=gi:4506730 /UG=Hs.241507 ribosomal protein S6 /FL=gb:M20020.1 gb:NM_001010.1
201255_x_at	881.7	P	0.000244	gb:NM_004639.1 /DEF=Homo sapiens HLA-B associated transcript-3 (D6S52E), mRNA. /FEA=mRNA /GEN=D6S52E /PROD=HLA-B associated transcript-3 /DB_XREF=gi:4758109 /UG=Hs.274348 HLA-B associated transcript-3 /FL=gb:M33519.1 gb:NM_004639.1
201256_at	1682.0	P	0.000244	gb:NM_004718.1 /DEF=Homo sapiens cytochrome c oxidase subunit VIIa polypeptide 2 like (COX7A2L), mRNA. /FEA=mRNA /GEN=COX7A2L /PROD=cytochrome c oxidase subunit VIIa polypeptide 2like /DB_XREF=gi:4758041 /UG=Hs.30888 cytochrome c oxidase subunit VIIa polypeptide 2 like /FL=gb:BC005251.1 gb:AB007618.1 gb:NM_004718.1
201257_x_at	15415.8	P	0.000244	gb:NM_001006.1 /DEF=Homo sapiens ribosomal protein S3A (RPS3A), mRNA. /FEA=mRNA /GEN=RPS3A /PROD=ribosomal protein S3A /DB_XREF=gi:4506722 /UG=Hs.77039 ribosomal protein S3A /FL=gb:BC000204.1 gb:BC001708.1 gb:BC004981.1 gb:M84711.1 gb:M77234.1 gb:L13802.1 gb:NM_001006.1
201258_at	6702.3	P	0.000244	gb:NM_001020.1 /DEF=Homo sapiens ribosomal protein S16 (RPS16), mRNA. /FEA=mRNA /GEN=RPS16 /PROD=ribosomal protein S16 /DB_XREF=gi:4506690 /UG=Hs.80617 ribosomal protein S16 /FL=gb:BC004324.1 gb:M60854.1 gb:NM_001020.1
201259_s_at	1741.4	P	0.000244	Consensus includes gb:AI768845 /FEA=EST /DB_XREF=gi:5235354 /DB_XREF=est:wj12e10.x1 /CLONE=IMAGE:2402634 /UG=Hs.80919 synaptophysin-like protein /FL=gb:NM_006754.1
201260_s_at	1572.7	P	0.000244	gb:NM_006754.1 /DEF=Homo sapiens synaptophysin-like protein (SYPL), mRNA. /FEA=mRNA /GEN=SYPL /PROD=synaptophysin-like protein /DB_XREF=gi:5803184 /UG=Hs.80919 synaptophysin-like protein /FL=gb:NM_006754.1
201261_x_at	29.3	M	0.056152	gb:BC002416.1 /DEF=Homo sapiens, biglycan, clone MGC:2298, mRNA, complete cds. /FEA=mRNA /PROD=biglycan /DB_XREF=gi:12803216 /UG=Hs.821 biglycan /FL=gb:BC002416.1 gb:BC004244.1 gb:J04599.1 gb:NM_001711.1
201262_s_at	1.6	A	0.943848	gb:NM_001711.1 /DEF=Homo sapiens biglycan (BGN), mRNA. /FEA=mRNA /GEN=BGN /PROD=biglycan /DB_XREF=gi:4502402 /UG=Hs.821 biglycan /FL=gb:BC002416.1 gb:BC004244.1 gb:J04599.1 gb:NM_001711.1
201263_at	951.2	P	0.000244	gb:NM_003191.1 /DEF=Homo sapiens threonyl-tRNA synthetase (TARS), mRNA. /FEA=mRNA /GEN=TARS /PROD=threonyl-tRNA synthetase /DB_XREF=gi:4507366 /UG=Hs.84131 threonyl-tRNA synthetase /FL=gb:BC000517.1 gb:M63180.1 gb:NM_003191.1
201264_at	908.0	P	0.000732	gb:NM_007263.1 /DEF=Homo sapiens coatomer protein complex, subunit epsilon (COPE), mRNA. /FEA=mRNA /GEN=COPE /PROD=coatomer protein complex, subunit epsilon /DB_XREF=gi:6005734 /UG=Hs.10326 coatomer protein complex, subunit epsilon /FL=gb:AL136928.1 gb:BC003155.1 gb:NM_007263.1
201265_at	2.3	A	0.888428	gb:AF119897.1 /DEF=Homo sapiens PRO2760 mRNA, complete cds. /FEA=mRNA /PROD=PRO2760 /DB_XREF=gi:7770230 /UG=Hs.111334 ferritin, light polypeptide /FL=gb:BC004245.1 gb:M11147.1 gb:M10119.1 gb:NM_000146.1 gb:AF119897.1
201266_at	3392.4	P	0.000244	gb:NM_003330.1 /DEF=Homo sapiens thioredoxin reductase 1 (TXNRD1), mRNA. /FEA=mRNA /GEN=TXNRD1 /PROD=thioredoxin reductase 1 /DB_XREF=gi:4507746 /UG=Hs.13046 thioredoxin reductase 1 /FL=gb:D88687.1 gb:AF077367.1 gb:NM_003330.1 gb:AF208018.1
201267_s_at	2030.4	P	0.000244	Consensus includes gb:AL545523 /FEA=EST /DB_XREF=gi:12878005 /DB_XREF=est:AL545523 /CLONE=CS0DI015YE19 (5 prime) /UG=Hs.250758 proteasome (prosome, macropain) 26S subunit, ATPase, 3 /FL=gb:M34079.1 gb:NM_002804.1
201268_at	7296.3	P	0.000244	gb:NM_002512.1 /DEF=Homo sapiens non-metastatic cells 2, protein (NM23B) expressed in (NME2), nuclear gene encoding mitochondrial protein, mRNA. /FEA=mRNA /GEN=NME2 /PROD=non-metastatic cells 2, protein (NM23B)expressed in /DB_XREF=gi:4505408 /UG=Hs.275163 non-metastatic cells 2, protein (NM23B) expressed in /FL=gb:BC002476.1 gb:M36981.1 gb:L16785.1 gb:NM_002512.1
201269_s_at	22.9	A	0.095215	Consensus includes gb:AB028991.1 /DEF=Homo sapiens mRNA for KIAA1068 protein, partial cds. /FEA=mRNA /GEN=KIAA1068 /PROD=KIAA1068 protein /DB_XREF=gi:5689472 /UG=Hs.4770 KIAA1068 protein /FL=gb:BC003691.1 gb:NM_015332.1
201270_x_at	373.7	P	0.000244	gb:NM_015332.1 /DEF=Homo sapiens KIAA1068 protein (KIAA1068), mRNA. /FEA=mRNA /GEN=KIAA1068 /PROD=KIAA1068 protein /DB_XREF=gi:13357209 /UG=Hs.4770 KIAA1068 protein /FL=gb:BC003691.1 gb:NM_015332.1
201271_s_at	400.6	P	0.000244	gb:NM_016732.1 /DEF=Homo sapiens RNA-binding protein (autoantigenic) (RALY), transcript variant 1, mRNA. /FEA=mRNA /GEN=RALY /PROD=RNA-binding protein (autoantigenic) longisoform /DB_XREF=gi:8051630 /UG=Hs.74111 RNA-binding protein (autoantigenic) /FL=gb:AF148457.1 gb:NM_016732.1
201272_at	34.2	A	0.129639	gb:NM_001628.1 /DEF=Homo sapiens aldo-keto reductase family 1, member B1 (aldose reductase) (AKR1B1), mRNA. /FEA=mRNA /GEN=AKR1B1 /PROD=aldo-keto reductase family 1, member B1 (aldosereductase) /DB_XREF=gi:4502048 /UG=Hs.75313 aldo-keto reductase family 1, member B1 (aldose reductase) /FL=gb:BC000260.1 gb:BC005387.1 gb:J04795.1 gb:J05017.1 gb:J05474.1 gb:M34720.1 gb:NM_001628.1
201273_s_at	4237.3	P	0.000244	gb:NM_003133.1 /DEF=Homo sapiens signal recognition particle 9kD (SRP9), mRNA. /FEA=mRNA /GEN=SRP9 /PROD=signal recognition particle 9kD /DB_XREF=gi:4507216 /UG=Hs.75975 signal recognition particle 9kD /FL=gb:NM_003133.1 gb:U20998.1
201274_at	2720.6	P	0.000244	gb:NM_002790.1 /DEF=Homo sapiens proteasome (prosome, macropain) subunit, alpha type, 5 (PSMA5), mRNA. /FEA=mRNA /GEN=PSMA5 /PROD=proteasome (prosome, macropain) subunit, alphatype, 5 /DB_XREF=gi:4506186 /UG=Hs.76913 proteasome (prosome, macropain) subunit, alpha type, 5 /FL=gb:NM_002790.1
201275_at	1151.1	P	0.000244	gb:NM_002004.1 /DEF=Homo sapiens farnesyl diphosphate synthase (farnesyl pyrophosphate synthetase, dimethylallyltranstransferase, geranyltranstransferase) (FDPS), mRNA. /FEA=mRNA /GEN=FDPS /PROD=farnesyl diphosphate synthase (farnesylpyrophosphate synthetase, dimethylallyltranstransferase,geranyltranstransferase) /DB_XREF=gi:4503684 /UG=Hs.77393 farnesyl diphosphate synthase (farnesyl pyrophospha…
201276_at	326.3	P	0.001221	gb:AF267863.1 /DEF=Homo sapiens DC43 mRNA, complete cds. /FEA=mRNA /PROD=DC43 /DB_XREF=gi:12006052 /UG=Hs.77690 RAB5B, member RAS oncogene family /FL=gb:AF267863.1 gb:NM_002868.1
201277_s_at	5241.4	P	0.000244	gb:NM_004499.1 /DEF=Homo sapiens heterogeneous nuclear ribonucleoprotein AB (HNRPAB), mRNA. /FEA=mRNA /GEN=HNRPAB /PROD=heterogeneous nuclear ribonucleoprotein AB /DB_XREF=gi:4758541 /UG=Hs.81361 heterogeneous nuclear ribonucleoprotein AB /FL=gb:BC002625.1 gb:BC004561.1 gb:M65028.1 gb:NM_004499.1
201278_at	128.1	P	0.000244	Consensus includes gb:N21202 /FEA=EST /DB_XREF=gi:1126372 /DB_XREF=est:yx41e12.s1 /CLONE=IMAGE:264334 /UG=Hs.81988 disabled (Drosophila) homolog 2 (mitogen-responsive phosphoprotein) /FL=gb:U39050.1 gb:U53446.1 gb:BC003064.1 gb:NM_001343.1
201279_s_at	35.8	A	0.080566	gb:BC003064.1 /DEF=Homo sapiens, disabled (Drosophila) homolog 2 (mitogen-responsive phosphoprotein), clone MGC:1764, mRNA, complete cds. /FEA=mRNA /PROD=disabled (Drosophila) homolog 2(mitogen-responsive phosphoprotein) /DB_XREF=gi:13111753 /UG=Hs.81988 disabled (Drosophila) homolog 2 (mitogen-responsive phosphoprotein) /FL=gb:U39050.1 gb:U53446.1 gb:BC003064.1 gb:NM_001343.1
201280_s_at	87.4	P	0.000244	gb:NM_001343.1 /DEF=Homo sapiens disabled (Drosophila) homolog 2 (mitogen-responsive phosphoprotein) (DAB2), mRNA. /FEA=mRNA /GEN=DAB2 /PROD=disabled (Drosophila) homolog 2 /DB_XREF=gi:4503250 /UG=Hs.81988 disabled (Drosophila) homolog 2 (mitogen-responsive phosphoprotein) /FL=gb:U39050.1 gb:U53446.1 gb:BC003064.1 gb:NM_001343.1
201281_at	1792.1	P	0.000244	gb:NM_007002.1 /DEF=Homo sapiens cell membrane glycoprotein, 110000M(r) (surface antigen) (GP110), mRNA. /FEA=mRNA /GEN=GP110 /PROD=cell membrane glycoprotein, 110000M(r) (surfaceantigen) /DB_XREF=gi:5901959 /UG=Hs.90107 cell membrane glycoprotein, 110000M(r) (surface antigen) /FL=gb:NM_007002.1 gb:D64154.1
201282_at	51.3	P	0.037598	gb:NM_002541.1 /DEF=Homo sapiens oxoglutarate dehydrogenase (lipoamide) (OGDH), mRNA. /FEA=mRNA /GEN=OGDH /PROD=oxoglutarate dehydrogenase (lipoamide) /DB_XREF=gi:4505492 /UG=Hs.168669 oxoglutarate dehydrogenase (lipoamide) /FL=gb:BC004964.1 gb:NM_002541.1 gb:D10523.1
201283_s_at	17.2	M	0.056152	gb:J03068.1 /DEF=Human DNF1552 (lung) mRNA, complete cds. /FEA=mRNA /DB_XREF=gi:181629 /UG=Hs.78223 N-acylaminoacyl-peptide hydrolase /FL=gb:BC000362.1 gb:BC001826.1 gb:J03068.1 gb:D38441.1 gb:AF141383.1 gb:NM_001640.2
201284_s_at	454.5	P	0.000244	gb:NM_001640.2 /DEF=Homo sapiens N-acylaminoacyl-peptide hydrolase (APEH), mRNA. /FEA=mRNA /GEN=APEH /PROD=N-acylaminoacyl-peptide hydrolase /DB_XREF=gi:9951916 /UG=Hs.78223 N-acylaminoacyl-peptide hydrolase /FL=gb:BC000362.1 gb:BC001826.1 gb:J03068.1 gb:D38441.1 gb:AF141383.1 gb:NM_001640.2
201285_at	808.6	P	0.000244	gb:NM_013446.1 /DEF=Homo sapiens makorin, ring finger protein, 1 (MKRN1), mRNA. /FEA=mRNA /GEN=MKRN1 /PROD=makorin, ring finger protein, 1 /DB_XREF=gi:7305272 /UG=Hs.7838 makorin, ring finger protein, 1 /FL=gb:AL136812.1 gb:AF192784.1 gb:NM_013446.1
201286_at	368.2	P	0.000244	Consensus includes gb:Z48199 /DEF=H.sapiens syndecan-1 gene (exons 2-5) /FEA=mRNA /DB_XREF=gi:666051 /UG=Hs.82109 syndecan 1 /FL=gb:J05392.1 gb:NM_002997.1
201287_s_at	357.9	P	0.000244	gb:NM_002997.1 /DEF=Homo sapiens syndecan 1 (SDC1), mRNA. /FEA=mRNA /GEN=SDC1 /PROD=syndecan 1 /DB_XREF=gi:4506858 /UG=Hs.82109 syndecan 1 /FL=gb:J05392.1 gb:NM_002997.1
201288_at	3.4	A	0.500000	gb:NM_001175.1 /DEF=Homo sapiens Rho GDP dissociation inhibitor (GDI) beta (ARHGDIB), mRNA. /FEA=mRNA /GEN=ARHGDIB /PROD=Rho GDP dissociation inhibitor (GDI) beta /DB_XREF=gi:10835001 /UG=Hs.83656 Rho GDP dissociation inhibitor (GDI) beta /FL=gb:NM_001175.1 gb:L20688.1
201289_at	422.9	P	0.000244	gb:NM_001554.1 /DEF=Homo sapiens cysteine-rich, angiogenic inducer, 61 (CYR61), mRNA. /FEA=mRNA /GEN=CYR61 /PROD=cysteine-rich, angiogenic inducer, 61 /DB_XREF=gi:4504612 /UG=Hs.8867 cysteine-rich, angiogenic inducer, 61 /FL=gb:BC001271.1 gb:U62015.1 gb:AF003594.1 gb:AF031385.1 gb:NM_001554.1
201290_at	6920.2	P	0.000244	gb:NM_014300.1 /DEF=Homo sapiens signal peptidase complex (18kD) (SPC18), mRNA. /FEA=mRNA /GEN=SPC18 /PROD=signal peptidase complex (18kD) /DB_XREF=gi:7657608 /UG=Hs.9534 signal peptidase complex (18kD) /FL=gb:BC000359.1 gb:AF061737.1 gb:AF108945.1 gb:NM_014300.1
201291_s_at	566.4	P	0.000244	Consensus includes gb:AU159942 /FEA=EST /DB_XREF=gi:11021463 /DB_XREF=est:AU159942 /CLONE=Y79AA1000724 /UG=Hs.156346 topoisomerase (DNA) II alpha (170kD) /FL=gb:J04088.1 gb:NM_001067.1
201292_at	362.3	P	0.000244	Consensus includes gb:AL561834 /FEA=EST /DB_XREF=gi:12909658 /DB_XREF=est:AL561834 /CLONE=CS0DB005YC15 (3 prime) /UG=Hs.156346 topoisomerase (DNA) II alpha (170kD) /FL=gb:J04088.1 gb:NM_001067.1
201293_x_at	12056.9	P	0.000244	gb:NM_021130.1 /DEF=Homo sapiens peptidylprolyl isomerase A (cyclophilin A) (PPIA), mRNA. /FEA=mRNA /GEN=PPIA /PROD=peptidylprolyl isomerase A (cyclophilin A) /DB_XREF=gi:10863926 /UG=Hs.182937 peptidylprolyl isomerase A (cyclophilin A) /FL=gb:NM_021130.1 gb:BC000689.1 gb:BC005320.1
201294_s_at	69.0	P	0.017578	Consensus includes gb:N24643 /FEA=EST /DB_XREF=gi:1138793 /DB_XREF=est:yx89f11.s1 /CLONE=IMAGE:268941 /UG=Hs.187991 DKFZP564A122 protein /FL=gb:AF106684.1 gb:NM_015626.1
201295_s_at	52.3	P	0.001221	Consensus includes gb:BF111821 /FEA=EST /DB_XREF=gi:10941511 /DB_XREF=est:7l36a06.x1 /CLONE=IMAGE:3523474 /UG=Hs.187991 DKFZP564A122 protein /FL=gb:AF106684.1 gb:NM_015626.1
201296_s_at	1139.7	P	0.000244	gb:NM_015626.1 /DEF=Homo sapiens DKFZP564A122 protein (DKFZP564A122), mRNA. /FEA=mRNA /GEN=DKFZP564A122 /PROD=DKFZP564A122 protein /DB_XREF=gi:7661595 /UG=Hs.187991 DKFZP564A122 protein /FL=gb:AF106684.1 gb:NM_015626.1
201297_s_at	443.6	P	0.000244	Consensus includes gb:AK023321.1 /DEF=Homo sapiens cDNA FLJ13259 fis, clone OVARC1000876, moderately similar to MOB1 PROTEIN. /FEA=mRNA /DB_XREF=gi:10435206 /UG=Hs.196437 hypothetical protein FLJ10788 /FL=gb:AB016839.1 gb:BC003398.1 gb:NM_018221.1
201298_s_at	1490.9	P	0.000244	gb:BC003398.1 /DEF=Homo sapiens, hypothetical protein FLJ10788, clone MGC:4929, mRNA, complete cds. /FEA=mRNA /PROD=hypothetical protein FLJ10788 /DB_XREF=gi:13097287 /UG=Hs.196437 hypothetical protein FLJ10788 /FL=gb:AB016839.1 gb:BC003398.1 gb:NM_018221.1
201299_s_at	614.4	P	0.000244	gb:NM_018221.1 /DEF=Homo sapiens hypothetical protein FLJ10788 (FLJ10788), mRNA. /FEA=mRNA /GEN=FLJ10788 /PROD=hypothetical protein FLJ10788 /DB_XREF=gi:8922670 /UG=Hs.196437 hypothetical protein FLJ10788 /FL=gb:AB016839.1 gb:BC003398.1 gb:NM_018221.1
201300_s_at	471.7	P	0.000244	gb:NM_000311.1 /DEF=Homo sapiens prion protein (p27-30) (Creutzfeld-Jakob disease, Gerstmann-Strausler-Scheinker syndrome, fatal familial insomnia) (PRNP), mRNA. /FEA=mRNA /GEN=PRNP /PROD=prion protein /DB_XREF=gi:4506112 /UG=Hs.74621 prion protein (p27-30) (Creutzfeld-Jakob disease, Gerstmann-Strausler-Scheinker syndrome, fatal familial insomnia) /FL=gb:AY008282.1 gb:M13899.1 gb:NM_000311.1
201301_s_at	1258.5	P	0.000244	gb:BC000182.1 /DEF=Homo sapiens, annexin A4, clone MGC:2271, mRNA, complete cds. /FEA=mRNA /PROD=annexin A4 /DB_XREF=gi:12652858 /UG=Hs.77840 annexin A4 /FL=gb:D78152.1 gb:BC000182.1 gb:M82809.1 gb:M19383.1 gb:NM_001153.2
201302_at	711.4	P	0.000244	gb:NM_001153.2 /DEF=Homo sapiens annexin A4 (ANXA4), mRNA. /FEA=mRNA /GEN=ANXA4 /PROD=annexin IV /DB_XREF=gi:4809272 /UG=Hs.77840 annexin A4 /FL=gb:D78152.1 gb:BC000182.1 gb:M82809.1 gb:M19383.1 gb:NM_001153.2
201303_at	2209.4	P	0.000244	gb:NM_014740.1 /DEF=Homo sapiens KIAA0111 gene product (KIAA0111), mRNA. /FEA=mRNA /GEN=KIAA0111 /PROD=KIAA0111 gene product /DB_XREF=gi:7661919 /UG=Hs.79768 KIAA0111 gene product /FL=gb:BC003662.1 gb:BC004386.1 gb:D21853.1 gb:NM_014740.1
201304_at	1391.8	P	0.000244	gb:NM_005000.2 /DEF=Homo sapiens NADH dehydrogenase (ubiquinone) 1 alpha subcomplex, 5 (13kD, B13) (NDUFA5), nuclear gene encoding mitochondrial protein, mRNA. /FEA=mRNA /GEN=NDUFA5 /PROD=NADH dehydrogenase (ubiquinone) 1 alphasubcomplex, 5 /DB_XREF=gi:13699821 /UG=Hs.83916 NADH dehydrogenase (ubiquinone) 1 alpha subcomplex, 5 (13kD, B13) /FL=gb:BC000813.1 gb:NM_005000.2 gb:U53468.1 gb:U64028.1
201305_x_at	3665.4	P	0.000244	Consensus includes gb:AV712577 /FEA=EST /DB_XREF=gi:10731883 /DB_XREF=est:AV712577 /CLONE=DCAAUH03 /UG=Hs.84264 acidic protein rich in leucines /FL=gb:U70439.1 gb:NM_006401.1
201306_s_at	4469.1	P	0.000244	gb:NM_006401.1 /DEF=Homo sapiens acidic protein rich in leucines (SSP29), mRNA. /FEA=mRNA /GEN=SSP29 /PROD=acidic protein rich in leucines /DB_XREF=gi:5454087 /UG=Hs.84264 acidic protein rich in leucines /FL=gb:U70439.1 gb:NM_006401.1
201307_at	313.0	P	0.000244	Consensus includes gb:AL534972 /FEA=EST /DB_XREF=gi:12798465 /DB_XREF=est:AL534972 /CLONE=CS0DF007YI02 (5 prime) /UG=Hs.8768 hypothetical protein FLJ10849 /FL=gb:NM_018243.1
201308_s_at	16.3	P	0.018555	gb:NM_018243.1 /DEF=Homo sapiens hypothetical protein FLJ10849 (FLJ10849), mRNA. /FEA=mRNA /GEN=FLJ10849 /PROD=hypothetical protein FLJ10849 /DB_XREF=gi:8922711 /UG=Hs.8768 hypothetical protein FLJ10849 /FL=gb:NM_018243.1
201309_x_at	27.8	M	0.056152	gb:U36189.1 /DEF=Human p311 protein (hP311) mRNA, complete cds. /FEA=mRNA /GEN=hP311 /PROD=p311 protein /DB_XREF=gi:1244509 /UG=Hs.142827 P311 protein /FL=gb:U36189.1 gb:NM_004772.1 gb:U30521.1
201310_s_at	219.0	P	0.000732	gb:NM_004772.1 /DEF=Homo sapiens P311 protein (P311), mRNA. /FEA=mRNA /GEN=P311 /PROD=P311 protein /DB_XREF=gi:4758865 /UG=Hs.142827 P311 protein /FL=gb:U36189.1 gb:NM_004772.1 gb:U30521.1
201311_s_at	1842.9	P	0.000244	Consensus includes gb:AL515318 /FEA=EST /DB_XREF=gi:12778811 /DB_XREF=est:AL515318 /CLONE=CL0BB030ZH05 (5 prime) /UG=Hs.14368 SH3 domain binding glutamic acid-rich protein like /FL=gb:AL136718.1 gb:AF042081.1 gb:NM_003022.1
201312_s_at	3390.3	P	0.000244	gb:NM_003022.1 /DEF=Homo sapiens SH3 domain binding glutamic acid-rich protein like (SH3BGRL), mRNA. /FEA=mRNA /GEN=SH3BGRL /PROD=SH3 domain binding glutamic acid-rich proteinlike /DB_XREF=gi:4506924 /UG=Hs.14368 SH3 domain binding glutamic acid-rich protein like /FL=gb:AL136718.1 gb:AF042081.1 gb:NM_003022.1
201313_at	88.8	P	0.004150	gb:NM_001975.1 /DEF=Homo sapiens enolase 2, (gamma, neuronal) (ENO2), mRNA. /FEA=mRNA /GEN=ENO2 /PROD=enolase 2, (gamma, neuronal) /DB_XREF=gi:5803010 /UG=Hs.146580 enolase 2, (gamma, neuronal) /FL=gb:BC002745.1 gb:NM_001975.1 gb:M22349.1
201314_at	174.3	P	0.000244	gb:NM_006374.1 /DEF=Homo sapiens serinethreonine kinase 25 (Ste20, yeast homolog) (STK25), mRNA. /FEA=mRNA /GEN=STK25 /PROD=serinethreonine kinase 25 (Ste20, yeasthomolog) /DB_XREF=gi:5454173 /UG=Hs.155206 serinethreonine kinase 25 (Ste20, yeast homolog) /FL=gb:D63780.1 gb:NM_006374.1
201315_x_at	3499.1	P	0.000244	gb:NM_006435.1 /DEF=Homo sapiens interferon induced transmembrane protein 2 (1-8D) (IFITM2), mRNA. /FEA=mRNA /GEN=IFITM2 /PROD=interferon induced transmembrane protein 2(1-8D) /DB_XREF=gi:10835237 /UG=Hs.174195 interferon induced transmembrane protein 2 (1-8D) /FL=gb:NM_006435.1
201316_at	302.2	P	0.000244	Consensus includes gb:AL523904 /FEA=EST /DB_XREF=gi:12787397 /DB_XREF=est:AL523904 /CLONE=CS0DC003YB07 (3 prime) /UG=Hs.181309 proteasome (prosome, macropain) subunit, alpha type, 2 /FL=gb:NM_002787.1
201317_s_at	2917.4	P	0.000244	gb:NM_002787.1 /DEF=Homo sapiens proteasome (prosome, macropain) subunit, alpha type, 2 (PSMA2), mRNA. /FEA=mRNA /GEN=PSMA2 /PROD=proteasome (prosome, macropain) subunit, alphatype, 2 /DB_XREF=gi:4506180 /UG=Hs.181309 proteasome (prosome, macropain) subunit, alpha type, 2 /FL=gb:NM_002787.1
201318_s_at	8369.1	P	0.000244	gb:NM_006471.1 /DEF=Homo sapiens myosin, light polypeptide, regulatory, non-sarcomeric (20kD) (MLCB), mRNA. /FEA=mRNA /GEN=MLCB /PROD=myosin, light polypeptide, regulatory,non-sarcomeric (20kD) /DB_XREF=gi:5453739 /UG=Hs.233936 myosin, light polypeptide, regulatory, non-sarcomeric (20kD) /FL=gb:NM_006471.1
201319_at	1133.6	P	0.000244	gb:NM_006471.1 /DEF=Homo sapiens myosin, light polypeptide, regulatory, non-sarcomeric (20kD) (MLCB), mRNA. /FEA=mRNA /GEN=MLCB /PROD=myosin, light polypeptide, regulatory,non-sarcomeric (20kD) /DB_XREF=gi:5453739 /UG=Hs.233936 myosin, light polypeptide, regulatory, non-sarcomeric (20kD) /FL=gb:NM_006471.1
201320_at	143.2	P	0.005859	Consensus includes gb:BF663402 /FEA=EST /DB_XREF=gi:11937297 /DB_XREF=est:602144558F1 /CLONE=IMAGE:4297695 /UG=Hs.236030 SWISNF related, matrix associated, actin dependent regulator of chromatin, subfamily c, member 2 /FL=gb:U66616.1 gb:NM_003075.1
201321_s_at	578.5	P	0.000244	gb:NM_003075.1 /DEF=Homo sapiens SWISNF related, matrix associated, actin dependent regulator of chromatin, subfamily c, member 2 (SMARCC2), mRNA. /FEA=mRNA /GEN=SMARCC2 /PROD=SWISNF related, matrix associated, actindependent regulator of chromatin, subfamily c, member 2 /DB_XREF=gi:4507080 /UG=Hs.236030 SWISNF related, matrix associated, actin dependent regulator of chromatin, subfamily c, membe…
201322_at	3643.8	P	0.000244	gb:NM_001686.1 /DEF=Homo sapiens ATP synthase, H+ transporting, mitochondrial F1 complex, beta polypeptide (ATP5B), nuclear gene encoding mitochondrial protein, mRNA. /FEA=mRNA /GEN=ATP5B /PROD=ATP synthase, H+ transporting, mitochondrial F1complex, beta polypeptide /DB_XREF=gi:4502294 /UG=Hs.25 ATP synthase, H+ transporting, mitochondrial F1 complex, beta polypeptide /FL=gb:D00022.1 gb:NM_001686…
201323_at	624.7	P	0.000244	gb:NM_006824.1 /DEF=Homo sapiens nucleolar protein p40; homolog of yeast EBNA1-binding protein (P40), mRNA. /FEA=mRNA /GEN=P40 /PROD=nucleolar protein p40; homolog of yeastEBNA1-binding protein /DB_XREF=gi:5803110 /UG=Hs.74407 nucleolar protein p40; homolog of yeast EBNA1-binding protein /FL=gb:U86602.1 gb:NM_006824.1
201324_at	1.7	A	0.423340	gb:NM_001423.1 /DEF=Homo sapiens epithelial membrane protein 1 (EMP1), mRNA. /FEA=mRNA /GEN=EMP1 /PROD=epithelial membrane protein 1 /DB_XREF=gi:4503558 /UG=Hs.79368 epithelial membrane protein 1 /FL=gb:U77085.1 gb:U43916.1 gb:NM_001423.1
201325_s_at	0.2	A	0.975098	gb:NM_001423.1 /DEF=Homo sapiens epithelial membrane protein 1 (EMP1), mRNA. /FEA=mRNA /GEN=EMP1 /PROD=epithelial membrane protein 1 /DB_XREF=gi:4503558 /UG=Hs.79368 epithelial membrane protein 1 /FL=gb:U77085.1 gb:U43916.1 gb:NM_001423.1
201326_at	920.2	P	0.000244	Consensus includes gb:BE737030 /FEA=EST /DB_XREF=gi:10151022 /DB_XREF=est:601304610F1 /CLONE=IMAGE:3639098 /UG=Hs.82916 chaperonin containing TCP1, subunit 6A (zeta 1) /FL=gb:M94083.1 gb:NM_001762.1 gb:L27706.1
201327_s_at	1500.6	P	0.000244	gb:NM_001762.1 /DEF=Homo sapiens chaperonin containing TCP1, subunit 6A (zeta 1) (CCT6A), mRNA. /FEA=mRNA /GEN=CCT6A /PROD=chaperonin containing TCP1, subunit 6A (zeta 1) /DB_XREF=gi:4502642 /UG=Hs.82916 chaperonin containing TCP1, subunit 6A (zeta 1) /FL=gb:M94083.1 gb:NM_001762.1 gb:L27706.1
201328_at	248.2	P	0.001221	Consensus includes gb:AL575509 /FEA=EST /DB_XREF=gi:12936742 /DB_XREF=est:AL575509 /CLONE=CS0DI059YP21 (3 prime) /UG=Hs.85146 v-ets avian erythroblastosis virus E26 oncogene homolog 2 /FL=gb:J04102.1 gb:NM_005239.1
201329_s_at	164.2	P	0.002930	gb:NM_005239.1 /DEF=Homo sapiens v-ets avian erythroblastosis virus E26 oncogene homolog 2 (ETS2), mRNA. /FEA=mRNA /GEN=ETS2 /PROD=v-ets avian erythroblastosis virus E26 oncogenehomolog 2 /DB_XREF=gi:4885220 /UG=Hs.85146 v-ets avian erythroblastosis virus E26 oncogene homolog 2 /FL=gb:J04102.1 gb:NM_005239.1
201330_at	517.0	P	0.008057	gb:NM_002887.1 /DEF=Homo sapiens arginyl-tRNA synthetase (RARS), mRNA. /FEA=mRNA /GEN=RARS /PROD=arginyl-tRNA synthetase /DB_XREF=gi:4506428 /UG=Hs.180832 arginyl-tRNA synthetase /FL=gb:BC000528.1 gb:NM_002887.1
201331_s_at	140.0	P	0.000244	gb:BC004973.1 /DEF=Homo sapiens, signal transducer and activator of transcription 6, interleukin-4 induced, clone MGC:3649, mRNA, complete cds. /FEA=mRNA /PROD=signal transducer and activator of transcription6, interleukin-4 induced /DB_XREF=gi:13436385 /UG=Hs.181015 signal transducer and activator of transcription 6, interleukin-4 induced /FL=gb:BC004973.1 gb:NM_003153.1 gb:U16031.1
201332_s_at	3.8	A	0.780518	gb:NM_003153.1 /DEF=Homo sapiens signal transducer and activator of transcription 6, interleukin-4 induced (STAT6), mRNA. /FEA=mRNA /GEN=STAT6 /PROD=signal transducer and activator of transcription6, interleukin-4 induced /DB_XREF=gi:4507258 /UG=Hs.181015 signal transducer and activator of transcription 6, interleukin-4 induced /FL=gb:BC004973.1 gb:NM_003153.1 gb:U16031.1
201333_s_at	56.3	P	0.046143	Consensus includes gb:AI807672 /FEA=EST /DB_XREF=gi:5394238 /DB_XREF=est:wf49f10.x1 /CLONE=IMAGE:2358955 /UG=Hs.6582 Rho guanine exchange factor (GEF) 12 /FL=gb:AF180681.1 gb:NM_015313.1
201334_s_at	426.2	P	0.000244	Consensus includes gb:AB002380.1 /DEF=Human mRNA for KIAA0382 gene, partial cds. /FEA=mRNA /GEN=KIAA0382 /DB_XREF=gi:2224704 /UG=Hs.6582 Rho guanine exchange factor (GEF) 12 /FL=gb:AF180681.1 gb:NM_015313.1
201335_s_at	19.9	A	0.111572	gb:NM_015313.1 /DEF=Homo sapiens KIAA0382 protein; leukemia-associated rho guanine nucleotide exchange factor (GEF) (ARHGEF12), mRNA. /FEA=mRNA /GEN=ARHGEF12 /PROD=KIAA0382 protein; leukemia-associated rhoguanine nucleotide exchange factor (GEF) /DB_XREF=gi:7662087 /UG=Hs.6582 Rho guanine exchange factor (GEF) 12 /FL=gb:AF180681.1 gb:NM_015313.1
201336_at	1849.8	P	0.000244	gb:BC003570.1 /DEF=Homo sapiens, Similar to vesicle-associated membrane protein 3, clone MGC:2110, mRNA, complete cds. /FEA=mRNA /PROD=Similar to vesicle-associated membrane protein3 /DB_XREF=gi:13097737 /UG=Hs.66708 vesicle-associated membrane protein 3 (cellubrevin) /FL=gb:BC003570.1 gb:NM_004781.2
201337_s_at	272.5	P	0.000244	gb:NM_004781.2 /DEF=Homo sapiens vesicle-associated membrane protein 3 (cellubrevin) (VAMP3), mRNA. /FEA=mRNA /GEN=VAMP3 /PROD=vesicle-associated membrane protein 3 /DB_XREF=gi:9257252 /UG=Hs.66708 vesicle-associated membrane protein 3 (cellubrevin) /FL=gb:BC003570.1 gb:NM_004781.2
201338_x_at	3171.8	P	0.000244	gb:NM_002097.1 /DEF=Homo sapiens general transcription factor IIIA (GTF3A), mRNA. /FEA=mRNA /GEN=GTF3A /PROD=general transcription factor IIIA /DB_XREF=gi:4753158 /UG=Hs.75113 general transcription factor IIIA /FL=gb:D32257.1 gb:NM_002097.1
201339_s_at	1298.3	P	0.000244	gb:NM_002979.1 /DEF=Homo sapiens sterol carrier protein 2 (SCP2), mRNA. /FEA=mRNA /GEN=SCP2 /PROD=sterol carrier protein 2 /DB_XREF=gi:4506822 /UG=Hs.75760 sterol carrier protein 2 /FL=gb:M75883.1 gb:M75884.1 gb:M55421.1 gb:NM_002979.1
201340_s_at	178.0	P	0.001953	gb:AF010314.1 /DEF=Homo sapiens Pig10 (PIG10) mRNA, complete cds. /FEA=mRNA /GEN=PIG10 /PROD=Pig10 /DB_XREF=gi:2415303 /UG=Hs.104925 ectodermal-neural cortex (with BTB-like domain) /FL=gb:BC000418.1 gb:AF010314.1 gb:AF059611.1 gb:AF005381.1 gb:NM_003633.1
201341_at	1069.8	P	0.001221	gb:NM_003633.1 /DEF=Homo sapiens ectodermal-neural cortex (with BTB-like domain) (ENC1), mRNA. /FEA=mRNA /GEN=ENC1 /PROD=ectodermal-neural cortex (with BTB-like domain) /DB_XREF=gi:4505460 /UG=Hs.104925 ectodermal-neural cortex (with BTB-like domain) /FL=gb:BC000418.1 gb:AF010314.1 gb:AF059611.1 gb:AF005381.1 gb:NM_003633.1
201342_at	1330.1	P	0.000244	gb:NM_003093.1 /DEF=Homo sapiens small nuclear ribonucleoprotein polypeptide C (SNRPC), mRNA. /FEA=mRNA /GEN=SNRPC /PROD=small nuclear ribonucleoprotein polypeptide C /DB_XREF=gi:4507126 /UG=Hs.1063 small nuclear ribonucleoprotein polypeptide C /FL=gb:NM_003093.1
201343_at	740.1	P	0.000244	Consensus includes gb:BE621259 /FEA=EST /DB_XREF=gi:9892197 /DB_XREF=est:601493415F1 /CLONE=IMAGE:3895850 /UG=Hs.108332 ubiquitin-conjugating enzyme E2D 2 (homologous to yeast UBC45) /FL=gb:U39317.1 gb:NM_003339.1
201344_at	105.2	P	0.000732	Consensus includes gb:BF196642 /FEA=EST /DB_XREF=gi:11084786 /DB_XREF=est:7m93c12.x1 /CLONE=IMAGE:3562750 /UG=Hs.108332 ubiquitin-conjugating enzyme E2D 2 (homologous to yeast UBC45) /FL=gb:U39317.1 gb:NM_003339.1
201345_s_at	781.8	P	0.000244	gb:NM_003339.1 /DEF=Homo sapiens ubiquitin-conjugating enzyme E2D 2 (homologous to yeast UBC45) (UBE2D2), mRNA. /FEA=mRNA /GEN=UBE2D2 /PROD=ubiquitin-conjugating enzyme E2D 2 (homologousto yeast UBC45) /DB_XREF=gi:4507774 /UG=Hs.108332 ubiquitin-conjugating enzyme E2D 2 (homologous to yeast UBC45) /FL=gb:U39317.1 gb:NM_003339.1
201346_at	1022.6	P	0.000244	gb:NM_024551.1 /DEF=Homo sapiens hypothetical protein FLJ21432 (FLJ21432), mRNA. /FEA=mRNA /GEN=FLJ21432 /PROD=hypothetical protein FLJ21432 /DB_XREF=gi:13375714 /UG=Hs.11641 hypothetical protein FLJ21432 /FL=gb:NM_024551.1 gb:BC004906.1
201347_x_at	972.9	P	0.000244	gb:NM_012203.1 /DEF=Homo sapiens glyoxylate reductasehydroxypyruvate reductase (GRHPR), mRNA. /FEA=mRNA /GEN=GRHPR /PROD=glyoxylate reductasehydroxypyruvate reductase /DB_XREF=gi:6912395 /UG=Hs.155742 glyoxylate reductasehydroxypyruvate reductase /FL=gb:AF113215.1 gb:BC000605.1 gb:BC003131.1 gb:AF146018.1 gb:AF113251.1 gb:AF134895.1 gb:NM_012203.1
201348_at	173.6	P	0.000244	gb:NM_002084.2 /DEF=Homo sapiens glutathione peroxidase 3 (plasma) (GPX3), mRNA. /FEA=mRNA /GEN=GPX3 /PROD=plasma glutathione peroxidase 3 precursor /DB_XREF=gi:6006000 /UG=Hs.172153 glutathione peroxidase 3 (plasma) /FL=gb:D00632.1 gb:NM_002084.2 gb:AF217787.1
201349_at	687.6	P	0.002930	gb:NM_004252.1 /DEF=Homo sapiens solute carrier family 9 (sodiumhydrogen exchanger), isoform 3 regulatory factor 1 (SLC9A3R1), mRNA. /FEA=mRNA /GEN=SLC9A3R1 /PROD=solute carrier family 9 (sodiumhydrogenexchanger), isoform 3 regulatory factor 1 /DB_XREF=gi:4759139 /UG=Hs.184276 solute carrier family 9 (sodiumhydrogen exchanger), isoform 3 regulatory factor 1 /FL=gb:BC001443.1 gb:BC003361.1 gb:AF03…
201350_at	204.8	P	0.001221	gb:NM_004475.1 /DEF=Homo sapiens flotillin 2 (FLOT2), mRNA. /FEA=mRNA /GEN=FLOT2 /PROD=flotillin 2 /DB_XREF=gi:4758393 /UG=Hs.184488 flotillin 2 /FL=gb:NM_004475.1 gb:M60922.1
201351_s_at	1814.6	P	0.000244	gb:AF070656.1 /DEF=Homo sapiens FtsH homolog mRNA, complete cds. /FEA=mRNA /PROD=FtsH homolog /DB_XREF=gi:4454687 /UG=Hs.206521 YME1 (S.cerevisiae)-like 1 /FL=gb:AF070656.1 gb:NM_014263.1
201352_at	2706.9	P	0.000244	gb:NM_014263.1 /DEF=Homo sapiens YME1 (S.cerevisiae)-like 1 (YME1L1), mRNA. /FEA=mRNA /GEN=YME1L1 /PROD=YME1 (S.cerevisiae)-like 1 /DB_XREF=gi:7657688 /UG=Hs.206521 YME1 (S.cerevisiae)-like 1 /FL=gb:AF070656.1 gb:NM_014263.1
201353_s_at	104.0	P	0.000732	Consensus includes gb:AI653126 /FEA=EST /DB_XREF=gi:4737105 /DB_XREF=est:wb43c08.x1 /CLONE=IMAGE:2308430 /UG=Hs.277401 bromodomain adjacent to zinc finger domain, 2A /FL=gb:AB032254.1 gb:NM_013449.1
201354_s_at	188.2	P	0.010742	Consensus includes gb:AA788652 /FEA=EST /DB_XREF=gi:2848772 /DB_XREF=est:ah30a09.s1 /CLONE=1240312 /UG=Hs.277401 bromodomain adjacent to zinc finger domain, 2A /FL=gb:AB032254.1 gb:NM_013449.1
201355_s_at	24.0	A	0.303711	gb:NM_013449.1 /DEF=Homo sapiens bromodomain adjacent to zinc finger domain, 2A (BAZ2A), mRNA. /FEA=mRNA /GEN=BAZ2A /PROD=bromodomain adjacent to zinc finger domain, 2A /DB_XREF=gi:7304920 /UG=Hs.277401 bromodomain adjacent to zinc finger domain, 2A /FL=gb:AB032254.1 gb:NM_013449.1
201356_at	659.3	P	0.000732	Consensus includes gb:BF129339 /FEA=EST /DB_XREF=gi:10968379 /DB_XREF=est:601810961R1 /CLONE=IMAGE:4053975 /UG=Hs.288883 splicing factor 3a, subunit 1, 120kD /FL=gb:NM_005877.1
201357_s_at	89.8	P	0.018555	gb:NM_005877.1 /DEF=Homo sapiens splicing factor 3a, subunit 1, 120kD (SF3A1), mRNA. /FEA=mRNA /GEN=SF3A1 /PROD=splicing factor 3a, subunit 1, 120kD /DB_XREF=gi:5032086 /UG=Hs.288883 splicing factor 3a, subunit 1, 120kD /FL=gb:NM_005877.1
201358_s_at	3604.4	P	0.000244	gb:NM_016451.1 /DEF=Homo sapiens coatomer protein complex, subunit beta (COPB), mRNA. /FEA=mRNA /GEN=COPB /PROD=coatomer protein complex, subunit beta /DB_XREF=gi:7705368 /UG=Hs.3059 coatomer protein complex, subunit beta /FL=gb:AF084457.1 gb:AL136593.1 gb:NM_016451.1
201359_at	1220.2	P	0.000732	gb:NM_016451.1 /DEF=Homo sapiens coatomer protein complex, subunit beta (COPB), mRNA. /FEA=mRNA /GEN=COPB /PROD=coatomer protein complex, subunit beta /DB_XREF=gi:7705368 /UG=Hs.3059 coatomer protein complex, subunit beta /FL=gb:AF084457.1 gb:AL136593.1 gb:NM_016451.1
201360_at	809.6	P	0.000244	gb:NM_000099.1 /DEF=Homo sapiens cystatin C (amyloid angiopathy and cerebral hemorrhage) (CST3), mRNA. /FEA=mRNA /GEN=CST3 /PROD=cystatin C (amyloid angiopathy and cerebralhemorrhage) /DB_XREF=gi:4503106 /UG=Hs.135084 cystatin C (amyloid angiopathy and cerebral hemorrhage) /FL=gb:NM_000099.1
201361_at	310.6	P	0.001221	gb:NM_024092.1 /DEF=Homo sapiens hypothetical protein MGC5508 (MGC5508), mRNA. /FEA=mRNA /GEN=MGC5508 /PROD=hypothetical protein MGC5508 /DB_XREF=gi:13129091 /UG=Hs.13662 hypothetical protein MGC5508 /FL=gb:BC001309.1 gb:NM_024092.1
201362_at	428.2	P	0.000244	gb:AF205218.1 /DEF=Homo sapiens NS1-binding protein-like protein mRNA, complete cds. /FEA=mRNA /PROD=NS1-binding protein-like protein /DB_XREF=gi:12003206 /UG=Hs.197298 NS1-binding protein /FL=gb:AF205218.1 gb:AB020657.1 gb:AF161553.1 gb:NM_016389.1
201363_s_at	291.5	P	0.000244	gb:AB020657.1 /DEF=Homo sapiens mRNA for KIAA0850 protein, complete cds. /FEA=mRNA /GEN=KIAA0850 /PROD=KIAA0850 protein /DB_XREF=gi:4240188 /UG=Hs.197298 NS1-binding protein /FL=gb:AF205218.1 gb:AB020657.1 gb:AF161553.1 gb:NM_016389.1
201364_s_at	552.7	P	0.000244	gb:AF242521.1 /DEF=Homo sapiens ornithine decarboxylase antizyme mRNA, complete cds. /FEA=mRNA /PROD=ornithine decarboxylase antizyme /DB_XREF=gi:9802039 /UG=Hs.74563 ornithine decarboxylase antizyme 2 /FL=gb:AF057297.1 gb:AF242521.1 gb:NM_002537.1
201365_at	367.4	P	0.001953	gb:NM_002537.1 /DEF=Homo sapiens ornithine decarboxylase antizyme 2 (OAZ2), mRNA. /FEA=mRNA /GEN=OAZ2 /PROD=ornithine decarboxylase antizyme 2 /DB_XREF=gi:9845506 /UG=Hs.74563 ornithine decarboxylase antizyme 2 /FL=gb:AF057297.1 gb:AF242521.1 gb:NM_002537.1
201366_at	718.9	P	0.000732	gb:NM_004034.1 /DEF=Homo sapiens annexin A7 (ANXA7), transcript variant 2, mRNA. /FEA=mRNA /GEN=ANXA7 /PROD=annexin VII isoform 2 /DB_XREF=gi:4809278 /UG=Hs.78637 annexin A7 /FL=gb:NM_004034.1
201367_s_at	42.9	P	0.037598	Consensus includes gb:AI356398 /FEA=EST /DB_XREF=gi:4108019 /DB_XREF=est:qz26f08.x1 /CLONE=IMAGE:2028039 /UG=Hs.78909 butyrate response factor 2 (EGF-response factor 2) /FL=gb:BC005010.1 gb:NM_006887.1
201368_at	3977.7	P	0.000244	Consensus includes gb:U07802 /DEF=Human Tis11d gene, complete cds /FEA=mRNA /DB_XREF=gi:984508 /UG=Hs.78909 butyrate response factor 2 (EGF-response factor 2) /FL=gb:BC005010.1 gb:NM_006887.1
201369_s_at	587.5	P	0.000244	gb:NM_006887.1 /DEF=Homo sapiens butyrate response factor 2 (EGF-response factor 2) (BRF2), mRNA. /FEA=mRNA /GEN=BRF2 /PROD=butyrate response factor 2 (EGF-response factor2) /DB_XREF=gi:5901899 /UG=Hs.78909 butyrate response factor 2 (EGF-response factor 2) /FL=gb:BC005010.1 gb:NM_006887.1
201370_s_at	161.7	P	0.000244	Consensus includes gb:AU145232 /FEA=EST /DB_XREF=gi:11006753 /DB_XREF=est:AU145232 /CLONE=HEMBA1004254 /UG=Hs.78946 cullin 3 /FL=gb:AF062537.1 gb:AB014517.1 gb:AF052147.1 gb:AF064087.1 gb:NM_003590.1
201371_s_at	1551.5	P	0.000244	gb:AF062537.1 /DEF=Homo sapiens cullin 3 mRNA, complete cds. /FEA=mRNA /PROD=cullin 3 /DB_XREF=gi:3139078 /UG=Hs.78946 cullin 3 /FL=gb:AF062537.1 gb:AB014517.1 gb:AF052147.1 gb:AF064087.1 gb:NM_003590.1
201372_s_at	5.3	A	0.665527	gb:NM_003590.1 /DEF=Homo sapiens cullin 3 (CUL3), mRNA. /FEA=mRNA /GEN=CUL3 /PROD=cullin 3 /DB_XREF=gi:4503164 /UG=Hs.78946 cullin 3 /FL=gb:AF062537.1 gb:AB014517.1 gb:AF052147.1 gb:AF064087.1 gb:NM_003590.1
201373_at	97.1	P	0.046143	gb:NM_000445.1 /DEF=Homo sapiens plectin 1, intermediate filament binding protein, 500kD (PLEC1), mRNA. /FEA=mRNA /GEN=PLEC1 /PROD=plectin 1, intermediate filament bindingprotein, 500kD /DB_XREF=gi:4505876 /UG=Hs.79706 plectin 1, intermediate filament binding protein, 500kD /FL=gb:U53204.1 gb:NM_000445.1
201374_x_at	20.2	A	0.095215	Consensus includes gb:AI379894 /FEA=EST /DB_XREF=gi:4189747 /DB_XREF=est:tc64g11.x1 /CLONE=IMAGE:2069444 /UG=Hs.80350 protein phosphatase 2 (formerly 2A), catalytic subunit, beta isoform /FL=gb:NM_004156.1
201375_s_at	1801.0	P	0.000244	gb:NM_004156.1 /DEF=Homo sapiens protein phosphatase 2 (formerly 2A), catalytic subunit, beta isoform (PPP2CB), mRNA. /FEA=mRNA /GEN=PPP2CB /PROD=protein phosphatase 2 (formerly 2A), catalyticsubunit, beta isoform /DB_XREF=gi:4758951 /UG=Hs.80350 protein phosphatase 2 (formerly 2A), catalytic subunit, beta isoform /FL=gb:NM_004156.1
201376_s_at	742.2	P	0.001953	Consensus includes gb:AI591354 /FEA=EST /DB_XREF=gi:4600402 /DB_XREF=est:ts10e04.x1 /CLONE=IMAGE:2228190 /UG=Hs.808 heterogeneous nuclear ribonucleoprotein F /FL=gb:BC001432.1 gb:L28010.1 gb:NM_004966.1
201377_at	552.5	P	0.000244	gb:NM_014847.1 /DEF=Homo sapiens KIAA0144 gene product (KIAA0144), mRNA. /FEA=mRNA /GEN=KIAA0144 /PROD=KIAA0144 gene product /DB_XREF=gi:7661941 /UG=Hs.8127 KIAA0144 gene product /FL=gb:D63478.1 gb:NM_014847.1
201378_s_at	142.8	P	0.005859	gb:NM_014847.1 /DEF=Homo sapiens KIAA0144 gene product (KIAA0144), mRNA. /FEA=mRNA /GEN=KIAA0144 /PROD=KIAA0144 gene product /DB_XREF=gi:7661941 /UG=Hs.8127 KIAA0144 gene product /FL=gb:D63478.1 gb:NM_014847.1
201379_s_at	1325.5	P	0.000244	gb:NM_003288.1 /DEF=Homo sapiens tumor protein D52-like 2 (TPD52L2), mRNA. /FEA=mRNA /GEN=TPD52L2 /PROD=tumor protein D52-like 2 /DB_XREF=gi:4507642 /UG=Hs.154718 tumor protein D52-like 2 /FL=gb:AF004430.1 gb:NM_003288.1
201380_at	217.5	P	0.000244	gb:NM_006371.1 /DEF=Homo sapiens cartilage associated protein (CRTAP), mRNA. /FEA=mRNA /GEN=CRTAP /PROD=cartilage associated protein /DB_XREF=gi:5453600 /UG=Hs.155481 cartilage associated protein /FL=gb:NM_006371.1
201381_x_at	2418.7	P	0.000244	gb:AF057356.1 /DEF=Homo sapiens calcyclin binding protein mRNA, complete cds. /FEA=mRNA /PROD=calcyclin binding protein /DB_XREF=gi:3063652 /UG=Hs.27258 calcyclin binding protein /FL=gb:AF314752.1 gb:AF057356.1 gb:NM_014412.1
201382_at	38.0	P	0.008057	gb:NM_014412.1 /DEF=Homo sapiens calcyclin binding protein (CACYBP), mRNA. /FEA=mRNA /GEN=CACYBP /PROD=calcyclin binding protein /DB_XREF=gi:7656951 /UG=Hs.27258 calcyclin binding protein /FL=gb:AF314752.1 gb:AF057356.1 gb:NM_014412.1
201383_s_at	129.7	P	0.000732	Consensus includes gb:AL044170 /FEA=EST /DB_XREF=gi:5935951 /DB_XREF=est:DKFZp434P2128_s1 /CLONE=DKFZp434P2128 /UG=Hs.277721 membrane component, chromosome 17, surface marker 2 (ovarian carcinoma antigen CA125) /FL=gb:D30756.1 gb:NM_005899.1
201384_s_at	926.1	P	0.000732	gb:NM_005899.1 /DEF=Homo sapiens membrane component, chromosome 17, surface marker 2 (ovarian carcinoma antigen CA125) (M17S2), mRNA. /FEA=mRNA /GEN=M17S2 /PROD=membrane component, chromosome 17, surfacemarker 2 (ovarian carcinoma antigen CA125) /DB_XREF=gi:5174504 /UG=Hs.277721 membrane component, chromosome 17, surface marker 2 (ovarian carcinoma antigen CA125) /FL=gb:D30756.1 gb:NM_005899.1
201385_at	2726.2	P	0.000732	gb:NM_001358.1 /DEF=Homo sapiens DEADH (Asp-Glu-Ala-AspHis) box polypeptide 15 (DDX15), mRNA. /FEA=mRNA /GEN=DDX15 /PROD=DEADH (Asp-Glu-Ala-AspHis) box polypeptide 15 /DB_XREF=gi:4557516 /UG=Hs.5683 DEADH (Asp-Glu-Ala-AspHis) box polypeptide 15 /FL=gb:AB001636.1 gb:NM_001358.1 gb:AF279891.1
201386_s_at	848.7	P	0.000244	gb:AF279891.1 /DEF=Homo sapiens dead box protein 15 mRNA, complete cds. /FEA=mRNA /PROD=dead box protein 15 /DB_XREF=gi:9624452 /UG=Hs.5683 DEADH (Asp-Glu-Ala-AspHis) box polypeptide 15 /FL=gb:AB001636.1 gb:NM_001358.1 gb:AF279891.1
201387_s_at	72.8	P	0.046143	gb:NM_004181.1 /DEF=Homo sapiens ubiquitin carboxyl-terminal esterase L1 (ubiquitin thiolesterase) (UCHL1), mRNA. /FEA=mRNA /GEN=UCHL1 /PROD=ubiquitin carboxyl-terminal esterase L1(ubiquitin thiolesterase) /DB_XREF=gi:4759283 /UG=Hs.76118 ubiquitin carboxyl-terminal esterase L1 (ubiquitin thiolesterase) /FL=gb:BC000332.1 gb:BC005117.1 gb:NM_004181.1
201388_at	295.3	P	0.001953	gb:NM_002809.1 /DEF=Homo sapiens proteasome (prosome, macropain) 26S subunit, non-ATPase, 3 (PSMD3), mRNA. /FEA=mRNA /GEN=PSMD3 /PROD=proteasome (prosome, macropain) 26S subunit,non-ATPase, 3 /DB_XREF=gi:4506228 /UG=Hs.9736 proteasome (prosome, macropain) 26S subunit, non-ATPase, 3 /FL=gb:BC000074.1 gb:BC004859.1 gb:D67025.1 gb:AF091075.1 gb:NM_002809.1
201389_at	54.4	P	0.018555	gb:NM_002205.1 /DEF=Homo sapiens integrin, alpha 5 (fibronectin receptor, alpha polypeptide) (ITGA5), mRNA. /FEA=mRNA /GEN=ITGA5 /PROD=integrin alpha 5 precursor /DB_XREF=gi:4504750 /UG=Hs.149609 integrin, alpha 5 (fibronectin receptor, alpha polypeptide) /FL=gb:NM_002205.1
201390_s_at	2434.3	P	0.000244	gb:NM_001320.1 /DEF=Homo sapiens casein kinase 2, beta polypeptide (CSNK2B), mRNA. /FEA=mRNA /GEN=CSNK2B /PROD=casein kinase 2, beta polypeptide /DB_XREF=gi:10334850 /UG=Hs.165843 casein kinase 2, beta polypeptide /FL=gb:NM_001320.1
201391_at	450.1	P	0.000244	gb:NM_016292.1 /DEF=Homo sapiens heat shock protein 75 (TRAP1), mRNA. /FEA=mRNA /GEN=TRAP1 /PROD=tumor necrosis factor type 1 receptor associatedprotein /DB_XREF=gi:7706484 /UG=Hs.182366 heat shock protein 75 /FL=gb:BC002994.1 gb:AF154108.1 gb:NM_016292.1
201392_s_at	719.0	P	0.000244	Consensus includes gb:BG031974 /FEA=EST /DB_XREF=gi:12422804 /DB_XREF=est:602300668F1 /CLONE=IMAGE:4402217 /UG=Hs.76473 insulin-like growth factor 2 receptor /FL=gb:J03528.1 gb:NM_000876.1
201393_s_at	779.6	P	0.000244	gb:NM_000876.1 /DEF=Homo sapiens insulin-like growth factor 2 receptor (IGF2R), mRNA. /FEA=mRNA /GEN=IGF2R /PROD=insulin-like growth factor 2 receptor /DB_XREF=gi:4504610 /UG=Hs.76473 insulin-like growth factor 2 receptor /FL=gb:J03528.1 gb:NM_000876.1
201394_s_at	236.1	P	0.001221	gb:U23946.1 /DEF=Human putative tumor suppressor (LUCA15) mRNA, complete cds. /FEA=mRNA /GEN=LUCA15 /DB_XREF=gi:1244403 /UG=Hs.201675 RNA binding motif protein 5 /FL=gb:U23946.1 gb:BC002957.1 gb:AF091263.1 gb:NM_005778.1
201395_at	682.0	P	0.000244	gb:NM_005778.1 /DEF=Homo sapiens RNA binding motif protein 5 (RBM5), mRNA. /FEA=mRNA /GEN=RBM5 /PROD=RNA binding motif protein 5 /DB_XREF=gi:5032030 /UG=Hs.201675 RNA binding motif protein 5 /FL=gb:U23946.1 gb:BC002957.1 gb:AF091263.1 gb:NM_005778.1
201396_s_at	87.9	A	0.149658	gb:NM_003021.2 /DEF=Homo sapiens small glutamine-rich tetratricopeptide repeat (TPR)-containing (SGT), mRNA. /FEA=mRNA /GEN=SGT /PROD=small glutamine-rich tetratricopeptide /DB_XREF=gi:13259553 /UG=Hs.203910 small glutamine-rich tetratricopeptide repeat (TPR)-containing /FL=gb:BC000390.1 gb:NM_003021.2 gb:BC005165.1 gb:AL050156.1
201397_at	89.4	P	0.014160	gb:NM_006623.1 /DEF=Homo sapiens phosphoglycerate dehydrogenase (PHGDH), mRNA. /FEA=mRNA /GEN=PHGDH /PROD=phosphoglycerate dehydrogenase /DB_XREF=gi:5729973 /UG=Hs.3343 phosphoglycerate dehydrogenase /FL=gb:BC000303.1 gb:BC001349.1 gb:AF006043.1 gb:NM_006623.1 gb:AF171237.1
201398_s_at	2191.9	P	0.000244	gb:BC000687.1 /DEF=Homo sapiens, translocating chain-associating membrane protein, clone MGC:784, mRNA, complete cds. /FEA=mRNA /PROD=translocating chain-associating membraneprotein /DB_XREF=gi:12653796 /UG=Hs.4147 translocating chain-associating membrane protein /FL=gb:BC000687.1 gb:NM_014294.1
201399_s_at	846.1	P	0.000732	gb:NM_014294.1 /DEF=Homo sapiens translocating chain-associating membrane protein (TRAM), mRNA. /FEA=mRNA /GEN=TRAM /PROD=translocating chain-associating membraneprotein /DB_XREF=gi:7657654 /UG=Hs.4147 translocating chain-associating membrane protein /FL=gb:BC000687.1 gb:NM_014294.1
201400_at	2058.8	P	0.000244	gb:NM_002795.1 /DEF=Homo sapiens proteasome (prosome, macropain) subunit, beta type, 3 (PSMB3), mRNA. /FEA=mRNA /GEN=PSMB3 /PROD=proteasome (prosome, macropain) subunit, betatype, 3 /DB_XREF=gi:4506196 /UG=Hs.82793 proteasome (prosome, macropain) subunit, beta type, 3 /FL=gb:NM_002795.1 gb:D26598.1
201401_s_at	33.3	P	0.030273	gb:M80776.1 /DEF=Human beta-adrenergic receptor kinase 1 mRNA, complete cds. /FEA=mRNA /GEN=receptor kinase /PROD=receptor kinase /DB_XREF=gi:179334 /UG=Hs.83636 adrenergic, beta, receptor kinase 1 /FL=gb:M80776.1 gb:NM_001619.2
201402_at	5.9	A	0.466064	gb:NM_001619.2 /DEF=Homo sapiens adrenergic, beta, receptor kinase 1 (ADRBK1), mRNA. /FEA=mRNA /GEN=ADRBK1 /PROD=beta adrenergic receptor kinase 1 /DB_XREF=gi:6138971 /UG=Hs.83636 adrenergic, beta, receptor kinase 1 /FL=gb:M80776.1 gb:NM_001619.2
201403_s_at	423.8	P	0.000732	gb:NM_004528.1 /DEF=Homo sapiens microsomal glutathione S-transferase 3 (MGST3), mRNA. /FEA=mRNA /GEN=MGST3 /PROD=microsomal glutathione S-transferase 3 /DB_XREF=gi:4758713 /UG=Hs.111811 microsomal glutathione S-transferase 3 /FL=gb:BC000505.1 gb:BC003034.1 gb:AF026977.1 gb:NM_004528.1
201404_x_at	72.3	P	0.005859	gb:BC000268.1 /DEF=Homo sapiens, proteasome (prosome, macropain) subunit, beta type, 2, clone MGC:1664, mRNA, complete cds. /FEA=mRNA /PROD=proteasome (prosome, macropain) subunit, betatype, 2 /DB_XREF=gi:12653014 /UG=Hs.1390 proteasome (prosome, macropain) subunit, beta type, 2 /FL=gb:BC000268.1 gb:NM_002794.1 gb:D26599.1
201405_s_at	1869.3	P	0.000244	gb:NM_006833.1 /DEF=Homo sapiens COP9 subunit 6 (MOV34 homolog, 34 kD) (MOV34-34KD), mRNA. /FEA=mRNA /GEN=MOV34-34KD /PROD=COP9 subunit 6 (MOV34 homolog, 34 kD) /DB_XREF=gi:5803095 /UG=Hs.15591 COP9 subunit 6 (MOV34 homolog, 34 kD) /FL=gb:BC002520.1 gb:U70735.1 gb:NM_006833.1
201406_at	11609.2	P	0.000244	gb:NM_021029.1 /DEF=Homo sapiens ribosomal protein L44 (RPL44), mRNA. /FEA=mRNA /GEN=RPL44 /PROD=ribosomal protein L44 /DB_XREF=gi:10445222 /UG=Hs.178391 ribosomal protein L44 /FL=gb:NM_021029.1 gb:BC001781.1
201407_s_at	666.3	P	0.000244	Consensus includes gb:AI186712 /FEA=EST /DB_XREF=gi:3737350 /DB_XREF=est:qe82f01.x1 /CLONE=IMAGE:1745497 /UG=Hs.21537 protein phosphatase 1, catalytic subunit, beta isoform /FL=gb:NM_002709.1 gb:AF092905.1
201408_at	270.3	P	0.000244	Consensus includes gb:W67887 /FEA=EST /DB_XREF=gi:1376776 /DB_XREF=est:zd38c11.s1 /CLONE=IMAGE:342932 /UG=Hs.21537 protein phosphatase 1, catalytic subunit, beta isoform /FL=gb:NM_002709.1 gb:AF092905.1
201409_s_at	804.5	P	0.000244	gb:NM_002709.1 /DEF=Homo sapiens protein phosphatase 1, catalytic subunit, beta isoform (PPP1CB), mRNA. /FEA=mRNA /GEN=PPP1CB /PROD=protein phosphatase 1, catalytic subunit, betaisoform /DB_XREF=gi:4506004 /UG=Hs.21537 protein phosphatase 1, catalytic subunit, beta isoform /FL=gb:NM_002709.1 gb:AF092905.1
201410_at	1822.8	P	0.000244	Consensus includes gb:AI983043 /FEA=EST /DB_XREF=gi:5810262 /DB_XREF=est:wz30b11.x1 /CLONE=IMAGE:2559549 /UG=Hs.246885 hypothetical protein FLJ20783 /FL=gb:NM_017958.1
201411_s_at	1062.5	P	0.000244	gb:NM_017958.1 /DEF=Homo sapiens hypothetical protein FLJ20783 (FLJ20783), mRNA. /FEA=mRNA /GEN=FLJ20783 /PROD=hypothetical protein FLJ20783 /DB_XREF=gi:8923679 /UG=Hs.246885 hypothetical protein FLJ20783 /FL=gb:NM_017958.1
201412_at	1582.8	P	0.000244	gb:NM_014045.1 /DEF=Homo sapiens DKFZP564C1940 protein (DKFZP564C1940), mRNA. /FEA=mRNA /GEN=DKFZP564C1940 /PROD=DKFZP564C1940 protein /DB_XREF=gi:13027587 /UG=Hs.3804 DKFZP564C1940 protein /FL=gb:BC000424.1 gb:NM_014045.1 gb:AF131760.1
201413_at	1947.0	P	0.000244	gb:NM_000414.1 /DEF=Homo sapiens hydroxysteroid (17-beta) dehydrogenase 4 (HSD17B4), mRNA. /FEA=mRNA /GEN=HSD17B4 /PROD=hydroxysteroid (17-beta) dehydrogenase 4 /DB_XREF=gi:4504504 /UG=Hs.75441 hydroxysteroid (17-beta) dehydrogenase 4 /FL=gb:BC003098.1 gb:NM_000414.1
201414_s_at	244.4	P	0.000244	gb:NM_005969.1 /DEF=Homo sapiens nucleosome assembly protein 1-like 4 (NAP1L4), mRNA. /FEA=mRNA /GEN=NAP1L4 /PROD=nucleosome assembly protein 1-like 4 /DB_XREF=gi:5174612 /UG=Hs.78103 nucleosome assembly protein 1-like 4 /FL=gb:U77456.1 gb:NM_005969.1
201415_at	805.0	P	0.000732	gb:NM_000178.1 /DEF=Homo sapiens glutathione synthetase (GSS), mRNA. /FEA=mRNA /GEN=GSS /PROD=glutathione synthetase /DB_XREF=gi:4504168 /UG=Hs.82327 glutathione synthetase /FL=gb:U34683.1 gb:NM_000178.1
201416_at	4066.8	P	0.000732	Consensus includes gb:BG528420 /FEA=EST /DB_XREF=gi:13519957 /DB_XREF=est:602579853F1 /CLONE=IMAGE:4719060 /UG=Hs.83484 SRY (sex determining region Y)-box 4 /FL=gb:NM_003107.1
201417_at	5987.4	P	0.000244	Consensus includes gb:AL136179 /DEF=Human DNA sequence from clone RP3-322L4 on chromosome 6. Contains the SOX4 gene for SRY (sex determining region Y)-box 4, a pseudogene similar to predicted fly, worm and yeast genes, ESTs, STSs, GSSs and four CpG islands /FEA=mRNA /DB_XREF=gi:8649149 /UG=Hs.83484 SRY (sex determining region Y)-box 4 /FL=gb:NM_003107.1
201418_s_at	731.6	P	0.001221	gb:NM_003107.1 /DEF=Homo sapiens SRY (sex determining region Y)-box 4 (SOX4), mRNA. /FEA=mRNA /GEN=SOX4 /PROD=SRY (sex determining region Y)-box 4 /DB_XREF=gi:4507162 /UG=Hs.83484 SRY (sex determining region Y)-box 4 /FL=gb:NM_003107.1
201419_at	64.5	P	0.046143	gb:NM_004656.1 /DEF=Homo sapiens BRCA1 associated protein-1 (ubiquitin carboxy-terminal hydrolase) (BAP1), mRNA. /FEA=mRNA /GEN=BAP1 /PROD=BRCA1 associated protein-1 (ubiquitincarboxy-terminal hydrolase) /DB_XREF=gi:4757835 /UG=Hs.106674 BRCA1 associated protein-1 (ubiquitin carboxy-terminal hydrolase) /FL=gb:BC001596.1 gb:AF045581.1 gb:NM_004656.1
201420_s_at	297.7	P	0.001953	Consensus includes gb:BF975273 /FEA=EST /DB_XREF=gi:12342488 /DB_XREF=est:602244783F1 /CLONE=IMAGE:4335765 /UG=Hs.11039 hypothetical protein MGC2722 /FL=gb:BC001679.1 gb:NM_024102.1
201421_s_at	140.0	P	0.001953	gb:NM_024102.1 /DEF=Homo sapiens hypothetical protein MGC2722 (MGC2722), mRNA. /FEA=mRNA /GEN=MGC2722 /PROD=hypothetical protein MGC2722 /DB_XREF=gi:13129109 /UG=Hs.11039 hypothetical protein MGC2722 /FL=gb:BC001679.1 gb:NM_024102.1
201422_at	692.3	P	0.000244	gb:NM_006332.1 /DEF=Homo sapiens interferon, gamma-inducible protein 30 (IFI30), mRNA. /FEA=mRNA /GEN=IFI30 /PROD=interferon, gamma-inducible protein 30 /DB_XREF=gi:5453695 /UG=Hs.14623 interferon, gamma-inducible protein 30 /FL=gb:J03909.1 gb:NM_006332.1 gb:AF097362.1
201423_s_at	245.8	P	0.000244	Consensus includes gb:AL037208 /FEA=EST /DB_XREF=gi:5406648 /DB_XREF=est:DKFZp564B1169_s1 /CLONE=DKFZp564B1169 /UG=Hs.183874 cullin 4A /FL=gb:NM_003589.1 gb:AF077188.1
201424_s_at	354.3	P	0.000732	gb:NM_003589.1 /DEF=Homo sapiens cullin 4A (CUL4A), mRNA. /FEA=mRNA /GEN=CUL4A /PROD=cullin 4A /DB_XREF=gi:11140810 /UG=Hs.183874 cullin 4A /FL=gb:NM_003589.1 gb:AF077188.1
201425_at	20.6	A	0.149658	gb:NM_000690.1 /DEF=Homo sapiens aldehyde dehydrogenase 2, mitochondrial (ALDH2), mRNA. /FEA=mRNA /GEN=ALDH2 /PROD=aldehyde dehydrogenase 2, mitochondrial /DB_XREF=gi:4502032 /UG=Hs.195432 aldehyde dehydrogenase 2 family (mitochondrial) /FL=gb:BC002967.1 gb:NM_000690.1
201426_s_at	20.9	A	0.274170	Consensus includes gb:AI922599 /FEA=EST /DB_XREF=gi:5658563 /DB_XREF=est:wm90b11.x1 /CLONE=IMAGE:2443197 /UG=Hs.297753 vimentin /FL=gb:BC000163.2 gb:NM_003380.1
201427_s_at	36.0	P	0.018555	gb:NM_005410.1 /DEF=Homo sapiens selenoprotein P, plasma, 1 (SEPP1), mRNA. /FEA=mRNA /GEN=SEPP1 /PROD=selenoprotein P precursor /DB_XREF=gi:4885590 /UG=Hs.3314 selenoprotein P, plasma, 1 /FL=gb:NM_005410.1
201428_at	1072.9	P	0.001953	gb:NM_001305.1 /DEF=Homo sapiens claudin 4 (CLDN4), mRNA. /FEA=mRNA /GEN=CLDN4 /PROD=claudin 4 /DB_XREF=gi:4502876 /UG=Hs.5372 claudin 4 /FL=gb:BC000671.1 gb:AB000712.1 gb:NM_001305.1
201429_s_at	18076.2	P	0.000244	gb:NM_000998.1 /DEF=Homo sapiens ribosomal protein L37a (RPL37A), mRNA. /FEA=mRNA /GEN=RPL37A /PROD=ribosomal protein L37a /DB_XREF=gi:4506642 /UG=Hs.5566 ribosomal protein L37a /FL=gb:BC000555.1 gb:L06499.1 gb:NM_000998.1
201430_s_at	1.1	A	0.952148	Consensus includes gb:W72516 /FEA=EST /DB_XREF=gi:1382173 /DB_XREF=est:zd64g05.s1 /CLONE=IMAGE:345464 /UG=Hs.74566 dihydropyrimidinase-like 3 /FL=gb:D78014.1 gb:NM_001387.1
201431_s_at	3.0	A	0.696289	gb:NM_001387.1 /DEF=Homo sapiens dihydropyrimidinase-like 3 (DPYSL3), mRNA. /FEA=mRNA /GEN=DPYSL3 /PROD=dihydropyrimidinase-like 3 /DB_XREF=gi:4503378 /UG=Hs.74566 dihydropyrimidinase-like 3 /FL=gb:D78014.1 gb:NM_001387.1
201432_at	1368.9	P	0.000244	gb:NM_001752.1 /DEF=Homo sapiens catalase (CAT), mRNA. /FEA=mRNA /GEN=CAT /PROD=catalase /DB_XREF=gi:4557013 /UG=Hs.76359 catalase /FL=gb:NM_001752.1
201433_s_at	1147.3	P	0.000244	gb:NM_014754.1 /DEF=Homo sapiens phosphatidylserine synthase 1 (PTDSS1), mRNA. /FEA=mRNA /GEN=PTDSS1 /PROD=phosphatidylserine synthase 1 /DB_XREF=gi:7662646 /UG=Hs.77329 phosphatidylserine synthase 1 /FL=gb:BC004192.1 gb:BC004390.1 gb:D14694.1 gb:NM_014754.1
201434_at	546.7	P	0.000732	gb:NM_003314.1 /DEF=Homo sapiens tetratricopeptide repeat domain 1 (TTC1), mRNA. /FEA=mRNA /GEN=TTC1 /PROD=tetratricopeptide repeat domain 1 /DB_XREF=gi:4507710 /UG=Hs.7733 tetratricopeptide repeat domain 1 /FL=gb:BC000942.1 gb:U46570.1 gb:NM_003314.1
201435_s_at	748.2	P	0.000244	Consensus includes gb:AW268640 /FEA=EST /DB_XREF=gi:6655670 /DB_XREF=est:xv52a03.x1 /CLONE=IMAGE:2816716 /UG=Hs.79306 eukaryotic translation initiation factor 4E /FL=gb:M15353.1 gb:NM_001968.1
201436_at	219.7	P	0.000244	Consensus includes gb:AI742789 /FEA=EST /DB_XREF=gi:5111077 /DB_XREF=est:wg46c05.x1 /CLONE=IMAGE:2368136 /UG=Hs.79306 eukaryotic translation initiation factor 4E /FL=gb:M15353.1 gb:NM_001968.1
201437_s_at	492.3	P	0.000244	gb:NM_001968.1 /DEF=Homo sapiens eukaryotic translation initiation factor 4E (EIF4E), mRNA. /FEA=mRNA /GEN=EIF4E /PROD=eukaryotic translation initiation factor 4E /DB_XREF=gi:4503534 /UG=Hs.79306 eukaryotic translation initiation factor 4E /FL=gb:M15353.1 gb:NM_001968.1
201438_at	18.7	A	0.274170	gb:NM_004369.1 /DEF=Homo sapiens collagen, type VI, alpha 3 (COL6A3), mRNA. /FEA=mRNA /GEN=COL6A3 /PROD=collagen, type VI, alpha 3 /DB_XREF=gi:4758027 /UG=Hs.80988 collagen, type VI, alpha 3 /FL=gb:NM_004369.1
201439_at	89.2	P	0.000244	gb:NM_004193.1 /DEF=Homo sapiens golgi-specific brefeldin A resistance factor 1 (GBF1), mRNA. /FEA=mRNA /GEN=GBF1 /PROD=golgi-specific brefeldin A resistance factor 1 /DB_XREF=gi:4758415 /UG=Hs.155499 golgi-specific brefeldin A resistance factor 1 /FL=gb:AF068755.1 gb:NM_004193.1
201440_at	508.9	P	0.001221	gb:NM_004818.1 /DEF=Homo sapiens prp28, U5 snRNP 100 kd protein (U5-100K), mRNA. /FEA=mRNA /GEN=U5-100K /PROD=prp28, U5 snRNP 100 kd protein /DB_XREF=gi:4759277 /UG=Hs.168103 prp28, U5 snRNP 100 kd protein /FL=gb:BC002366.1 gb:AF026402.1 gb:NM_004818.1
201441_at	3727.1	P	0.000244	gb:NM_001863.2 /DEF=Homo sapiens cytochrome c oxidase subunit VIb (COX6B), nuclear gene encoding mitochondrial protein, mRNA. /FEA=mRNA /GEN=COX6B /PROD=cytochrome c oxidase subunit VIb /DB_XREF=gi:6680989 /UG=Hs.174031 cytochrome c oxidase subunit VIb /FL=gb:BC001015.1 gb:BC002478.1 gb:NM_001863.2
201442_s_at	20.6	A	0.111572	Consensus includes gb:AF248966.1 /DEF=Homo sapiens HT028 mRNA, complete cds. /FEA=mRNA /PROD=HT028 /DB_XREF=gi:12005668 /UG=Hs.183434 ATPase, H+ transporting, lysosomal (vacuolar proton pump) membrane sector associated protein M8-9 /FL=gb:AF248966.1 gb:NM_005765.1
201443_s_at	2572.9	P	0.000244	gb:AF248966.1 /DEF=Homo sapiens HT028 mRNA, complete cds. /FEA=mRNA /PROD=HT028 /DB_XREF=gi:12005668 /UG=Hs.183434 ATPase, H+ transporting, lysosomal (vacuolar proton pump) membrane sector associated protein M8-9 /FL=gb:AF248966.1 gb:NM_005765.1
201444_s_at	1176.7	P	0.000244	gb:NM_005765.1 /DEF=Homo sapiens ATPase, H+ transporting, lysosomal (vacuolar proton pump) membrane sector associated protein M8-9 (APT6M8-9), mRNA. /FEA=mRNA /GEN=APT6M8-9 /PROD=ATPase, H+ transporting, lysosomal (vacuolarproton pump) membrane sector associated protein M8-9 /DB_XREF=gi:5031590 /UG=Hs.183434 ATPase, H+ transporting, lysosomal (vacuolar proton pump) membrane sector associated prot…
201445_at	0.4	A	0.969727	gb:NM_001839.1 /DEF=Homo sapiens calponin 3, acidic (CNN3), mRNA. /FEA=mRNA /GEN=CNN3 /PROD=calponin 3 /DB_XREF=gi:4502922 /UG=Hs.194662 calponin 3, acidic /FL=gb:NM_001839.1
201446_s_at	369.2	P	0.000732	Consensus includes gb:BF692742 /FEA=EST /DB_XREF=gi:11978150 /DB_XREF=est:602079823F1 /CLONE=IMAGE:4244524 /UG=Hs.239489 TIA1 cytotoxic granule-associated RNA-binding protein /FL=gb:NM_022037.1 gb:M77142.1
201447_at	199.5	P	0.000732	Consensus includes gb:H96549 /FEA=EST /DB_XREF=gi:1110035 /DB_XREF=est:yw01c09.s1 /CLONE=IMAGE:250960 /UG=Hs.239489 TIA1 cytotoxic granule-associated RNA-binding protein /FL=gb:NM_022037.1 gb:M77142.1
201448_at	483.7	P	0.000244	Consensus includes gb:AL046419 /FEA=EST /DB_XREF=gi:5434493 /DB_XREF=est:DKFZp434N247_s1 /CLONE=DKFZp434N247 /UG=Hs.239489 TIA1 cytotoxic granule-associated RNA-binding protein /FL=gb:NM_022037.1 gb:M77142.1
201449_at	158.5	P	0.000244	Consensus includes gb:AL567227 /FEA=EST /DB_XREF=gi:12920378 /DB_XREF=est:AL567227 /CLONE=CS0DF027YA11 (3 prime) /UG=Hs.239489 TIA1 cytotoxic granule-associated RNA-binding protein /FL=gb:NM_022037.1 gb:M77142.1
201450_s_at	483.1	P	0.000244	gb:NM_022037.1 /DEF=Homo sapiens TIA1 cytotoxic granule-associated RNA-binding protein (TIA1), transcript variant 1, mRNA. /FEA=mRNA /GEN=TIA1 /PROD=TIA1 protein, isoform 1 /DB_XREF=gi:11863160 /UG=Hs.239489 TIA1 cytotoxic granule-associated RNA-binding protein /FL=gb:NM_022037.1 gb:M77142.1
201451_x_at	22.6	A	0.194580	Consensus includes gb:D78132.1 /DEF=Homo sapiens mRNA for ras-related GTP-binding protein, complete cds. /FEA=mRNA /GEN=Rheb /PROD=ras-related GTP-binding protein /DB_XREF=gi:1772344 /UG=Hs.279903 Ras homolog enriched in brain 2 /FL=gb:D78132.1 gb:NM_005614.1 gb:AF148645.1
201452_at	61.9	P	0.014160	Consensus includes gb:AW138374 /FEA=EST /DB_XREF=gi:6142692 /DB_XREF=est:UI-H-BI1-adb-e-09-0-UI.s1 /CLONE=IMAGE:2716145 /UG=Hs.279903 Ras homolog enriched in brain 2 /FL=gb:D78132.1 gb:NM_005614.1 gb:AF148645.1
201453_x_at	2207.4	P	0.000244	gb:NM_005614.1 /DEF=Homo sapiens Ras homolog enriched in brain 2 (RHEB2), mRNA. /FEA=mRNA /GEN=RHEB2 /PROD=Ras homolog enriched in brain 2 /DB_XREF=gi:5032040 /UG=Hs.279903 Ras homolog enriched in brain 2 /FL=gb:D78132.1 gb:NM_005614.1 gb:AF148645.1
201454_s_at	1550.3	P	0.000244	Consensus includes gb:AW055008 /FEA=EST /DB_XREF=gi:5920711 /DB_XREF=est:wy98c09.x1 /CLONE=IMAGE:2556592 /UG=Hs.293007 aminopeptidase puromycin sensitive /FL=gb:NM_006310.1
201455_s_at	702.1	P	0.000244	Consensus includes gb:AJ132583.1 /DEF=Homo sapiens mRNA for puromycin sensitive aminopeptidase, partial. /FEA=mRNA /PROD=puromycin sensitive aminopeptidase /DB_XREF=gi:4210725 /UG=Hs.293007 aminopeptidase puromycin sensitive /FL=gb:NM_006310.1
201456_s_at	555.3	P	0.000244	Consensus includes gb:AU160695 /FEA=EST /DB_XREF=gi:11022216 /DB_XREF=est:AU160695 /CLONE=Y79AA1002240 /UG=Hs.40323 BUB3 (budding uninhibited by benzimidazoles 3, yeast) homolog /FL=gb:BC005138.1 gb:AF047472.1 gb:AF053304.1 gb:AF081496.1 gb:NM_004725.1
201457_x_at	1911.9	P	0.000244	gb:AF081496.1 /DEF=Homo sapiens kinetochore protein BUB3 (BUB3) mRNA, complete cds. /FEA=mRNA /GEN=BUB3 /PROD=kinetochore protein BUB3 /DB_XREF=gi:3639059 /UG=Hs.40323 BUB3 (budding uninhibited by benzimidazoles 3, yeast) homolog /FL=gb:BC005138.1 gb:AF047472.1 gb:AF053304.1 gb:AF081496.1 gb:NM_004725.1
201458_s_at	1073.8	P	0.000244	gb:NM_004725.1 /DEF=Homo sapiens BUB3 (budding uninhibited by benzimidazoles 3, yeast) homolog (BUB3), mRNA. /FEA=mRNA /GEN=BUB3 /PROD=BUB3 (budding uninhibited by benzimidazoles 3,yeast) homolog /DB_XREF=gi:4757879 /UG=Hs.40323 BUB3 (budding uninhibited by benzimidazoles 3, yeast) homolog /FL=gb:BC005138.1 gb:AF047472.1 gb:AF053304.1 gb:AF081496.1 gb:NM_004725.1
201459_at	1345.9	P	0.000244	gb:NM_006666.1 /DEF=Homo sapiens RuvB (E coli homolog)-like 2 (RUVBL2), mRNA. /FEA=mRNA /GEN=RUVBL2 /PROD=RuvB (E coli homolog)-like 2 /DB_XREF=gi:5730022 /UG=Hs.6455 RuvB (E coli homolog)-like 2 /FL=gb:BC000428.1 gb:BC004531.1 gb:AB024301.1 gb:AF151804.1 gb:AF155138.1 gb:NM_006666.1 gb:AL136743.1 gb:AF124607.1
201460_at	431.0	P	0.000244	Consensus includes gb:AI141802 /FEA=EST /DB_XREF=gi:3649259 /DB_XREF=est:qa56e05.s1 /CLONE=IMAGE:1690784 /UG=Hs.75074 mitogen-activated protein kinase-activated protein kinase 2 /FL=gb:NM_004759.1 gb:U12779.1
201461_s_at	60.7	P	0.005859	gb:NM_004759.1 /DEF=Homo sapiens mitogen-activated protein kinase-activated protein kinase 2 (MAPKAPK2), mRNA. /FEA=mRNA /GEN=MAPKAPK2 /PROD=mitogen-activated protein kinase-activatedprotein kinase 2 /DB_XREF=gi:10863900 /UG=Hs.75074 mitogen-activated protein kinase-activated protein kinase 2 /FL=gb:NM_004759.1 gb:U12779.1
201462_at	1656.2	P	0.000244	gb:NM_014766.1 /DEF=Homo sapiens KIAA0193 gene product (KIAA0193), mRNA. /FEA=mRNA /GEN=KIAA0193 /PROD=KIAA0193 gene product /DB_XREF=gi:7661983 /UG=Hs.75137 KIAA0193 gene product /FL=gb:D83777.1 gb:NM_014766.1
201463_s_at	4685.7	P	0.000244	gb:NM_006755.1 /DEF=Homo sapiens transaldolase 1 (TALDO1), mRNA. /FEA=mRNA /GEN=TALDO1 /PROD=transaldolase 1 /DB_XREF=gi:5803186 /UG=Hs.77290 transaldolase 1 /FL=gb:L19437.2 gb:NM_006755.1
201464_x_at	2291.2	P	0.005859	Consensus includes gb:BG491844 /FEA=EST /DB_XREF=gi:13453356 /DB_XREF=est:602535931T1 /CLONE=IMAGE:4684998 /UG=Hs.78465 v-jun avian sarcoma virus 17 oncogene homolog /FL=gb:BC002646.1 gb:NM_002228.2
201465_s_at	257.2	P	0.008057	gb:BC002646.1 /DEF=Homo sapiens, v-jun avian sarcoma virus 17 oncogene homolog, clone MGC:3338, mRNA, complete cds. /FEA=mRNA /PROD=v-jun avian sarcoma virus 17 oncogene homolog /DB_XREF=gi:12803622 /UG=Hs.78465 v-jun avian sarcoma virus 17 oncogene homolog /FL=gb:BC002646.1 gb:NM_002228.2
201466_s_at	892.7	P	0.000244	gb:NM_002228.2 /DEF=Homo sapiens v-jun avian sarcoma virus 17 oncogene homolog (JUN), mRNA. /FEA=mRNA /GEN=JUN /PROD=v-jun avian sarcoma virus 17 oncogene homolog /DB_XREF=gi:7710122 /UG=Hs.78465 v-jun avian sarcoma virus 17 oncogene homolog /FL=gb:BC002646.1 gb:NM_002228.2
201467_s_at	10449.5	P	0.000244	Consensus includes gb:AI039874 /FEA=EST /DB_XREF=gi:3279068 /DB_XREF=est:ox97c05.x1 /CLONE=IMAGE:1664264 /UG=Hs.80706 diaphorase (NADHNADPH) (cytochrome b-5 reductase) /FL=gb:J03934.1 gb:NM_000903.1
201468_s_at	16709.9	P	0.000244	gb:NM_000903.1 /DEF=Homo sapiens diaphorase (NADHNADPH) (cytochrome b-5 reductase) (DIA4), mRNA. /FEA=mRNA /GEN=DIA4 /PROD=NAD(P)H menadione oxidoreductase 1,dioxin-inducible /DB_XREF=gi:4505414 /UG=Hs.80706 diaphorase (NADHNADPH) (cytochrome b-5 reductase) /FL=gb:J03934.1 gb:NM_000903.1
201469_s_at	19.5	A	0.171387	Consensus includes gb:AI809967 /FEA=EST /DB_XREF=gi:5396533 /DB_XREF=est:wf64c03.x1 /CLONE=IMAGE:2360356 /UG=Hs.81972 SHC (Src homology 2 domain-containing) transforming protein 1 /FL=gb:NM_003029.1 gb:U73377.1
201470_at	1214.9	P	0.000244	gb:NM_004832.1 /DEF=Homo sapiens glutathione-S-transferase like; glutathione transferase omega (GSTTLp28), mRNA. /FEA=mRNA /GEN=GSTTLp28 /PROD=glutathione-S-transferase like /DB_XREF=gi:4758483 /UG=Hs.11465 glutathione-S-transferase like; glutathione transferase omega /FL=gb:BC000127.1 gb:U90313.1 gb:NM_004832.1 gb:AF212303.1
201471_s_at	2819.9	P	0.000244	gb:NM_003900.1 /DEF=Homo sapiens sequestosome 1 (SQSTM1), mRNA. /FEA=mRNA /GEN=SQSTM1 /PROD=sequestosome 1 /DB_XREF=gi:4505570 /UG=Hs.182248 sequestosome 1 /FL=gb:U41806.1 gb:BC003139.1 gb:U46751.1 gb:NM_003900.1
201472_at	2075.8	P	0.000244	gb:NM_003372.2 /DEF=Homo sapiens von Hippel-Lindau binding protein 1 (VBP1), mRNA. /FEA=mRNA /GEN=VBP1 /PROD=von Hippel-Lindau binding protein 1 /DB_XREF=gi:9257253 /UG=Hs.198307 von Hippel-Lindau binding protein 1 /FL=gb:U96759.1 gb:NM_003372.2
201473_at	234.7	P	0.000732	gb:NM_002229.1 /DEF=Homo sapiens jun B proto-oncogene (JUNB), mRNA. /FEA=mRNA /GEN=JUNB /PROD=jun B proto-oncogene /DB_XREF=gi:4504808 /UG=Hs.198951 jun B proto-oncogene /FL=gb:BC004250.1 gb:NM_002229.1
201474_s_at	81.3	A	0.080566	gb:NM_002204.1 /DEF=Homo sapiens integrin, alpha 3 (antigen CD49C, alpha 3 subunit of VLA-3 receptor) (ITGA3), transcript variant a, mRNA. /FEA=mRNA /GEN=ITGA3 /PROD=integrin alpha 3 isoform a precursor /DB_XREF=gi:4504746 /UG=Hs.265829 integrin, alpha 3 (antigen CD49C, alpha 3 subunit of VLA-3 receptor) /FL=gb:M59911.1 gb:NM_002204.1
201475_x_at	650.5	P	0.000244	gb:NM_004990.1 /DEF=Homo sapiens methionine-tRNA synthetase (MARS), mRNA. /FEA=mRNA /GEN=MARS /PROD=methionine-tRNA synthetase /DB_XREF=gi:4826825 /UG=Hs.279946 methionine-tRNA synthetase /FL=gb:BC002384.1 gb:NM_004990.1 gb:D84224.1
201476_s_at	93.6	P	0.000244	Consensus includes gb:AI692974 /FEA=EST /DB_XREF=gi:4970314 /DB_XREF=est:wd36e03.x1 /CLONE=IMAGE:2330236 /UG=Hs.2934 ribonucleotide reductase M1 polypeptide /FL=gb:NM_001033.1
201477_s_at	784.1	P	0.000244	gb:NM_001033.1 /DEF=Homo sapiens ribonucleotide reductase M1 polypeptide (RRM1), mRNA. /FEA=mRNA /GEN=RRM1 /PROD=ribonucleotide reductase M1 polypeptide /DB_XREF=gi:4506748 /UG=Hs.2934 ribonucleotide reductase M1 polypeptide /FL=gb:NM_001033.1
201478_s_at	930.6	P	0.000244	gb:U59151.1 /DEF=Human Cbf5p homolog (CBF5) mRNA, complete cds. /FEA=mRNA /GEN=CBF5 /PROD=Cbf5p homolog /DB_XREF=gi:2737893 /UG=Hs.4747 dyskeratosis congenita 1, dyskerin /FL=gb:U59151.1 gb:AF067008.1 gb:NM_001363.1
201479_at	1420.3	P	0.000244	gb:NM_001363.1 /DEF=Homo sapiens dyskeratosis congenita 1, dyskerin (DKC1), mRNA. /FEA=mRNA /GEN=DKC1 /PROD=dyskeratosis congenita 1, dyskerin /DB_XREF=gi:4503336 /UG=Hs.4747 dyskeratosis congenita 1, dyskerin /FL=gb:U59151.1 gb:AF067008.1 gb:NM_001363.1
201480_s_at	364.8	P	0.001221	gb:NM_003169.1 /DEF=Homo sapiens suppressor of Ty (S.cerevisiae) 5 homolog (SUPT5H), mRNA. /FEA=mRNA /GEN=SUPT5H /PROD=suppressor of Ty (S.cerevisiae) 5 homolog /DB_XREF=gi:4507312 /UG=Hs.70186 suppressor of Ty (S.cerevisiae) 5 homolog /FL=gb:U56402.1 gb:AB000516.1 gb:NM_003169.1
201481_s_at	228.4	P	0.008057	gb:NM_002862.1 /DEF=Homo sapiens phosphorylase, glycogen; brain (PYGB), nuclear gene encoding mitochondrial protein, mRNA. /FEA=mRNA /GEN=PYGB /PROD=phosphorylase, glycogen; brain /DB_XREF=gi:4506350 /UG=Hs.75658 phosphorylase, glycogen; brain /FL=gb:U47025.1 gb:NM_002862.1
201482_at	332.7	P	0.014160	gb:NM_002826.2 /DEF=Homo sapiens quiescin Q6 (QSCN6), mRNA. /FEA=mRNA /GEN=QSCN6 /PROD=quiescin Q6 /DB_XREF=gi:13325074 /UG=Hs.77266 quiescin Q6 /FL=gb:L42379.1 gb:U97276.2 gb:NM_002826.2
201483_s_at	2640.1	P	0.000244	gb:BC002802.1 /DEF=Homo sapiens, suppressor of Ty (S.cerevisiae) 4 homolog 1, clone MGC:3864, mRNA, complete cds. /FEA=mRNA /PROD=suppressor of Ty (S.cerevisiae) 4 homolog 1 /DB_XREF=gi:12803910 /UG=Hs.79058 suppressor of Ty (S.cerevisiae) 4 homolog 1 /FL=gb:BC002802.1 gb:U43923.1 gb:U38818.1 gb:U38817.1 gb:NM_003168.1
201484_at	960.0	P	0.000244	gb:NM_003168.1 /DEF=Homo sapiens suppressor of Ty (S.cerevisiae) 4 homolog 1 (SUPT4H1), mRNA. /FEA=mRNA /GEN=SUPT4H1 /PROD=suppressor of Ty (S.cerevisiae) 4 homolog 1 /DB_XREF=gi:4507310 /UG=Hs.79058 suppressor of Ty (S.cerevisiae) 4 homolog 1 /FL=gb:BC002802.1 gb:U43923.1 gb:U38818.1 gb:U38817.1 gb:NM_003168.1
201485_s_at	1796.1	P	0.000244	gb:BC004892.1 /DEF=Homo sapiens, reticulocalbin 2, EF-hand calcium binding domain, clone MGC:1650, mRNA, complete cds. /FEA=mRNA /PROD=reticulocalbin 2, EF-hand calcium bindingdomain /DB_XREF=gi:13436151 /UG=Hs.79088 reticulocalbin 2, EF-hand calcium binding domain /FL=gb:BC004892.1 gb:NM_002902.1
201486_at	2104.6	P	0.000732	gb:NM_002902.1 /DEF=Homo sapiens reticulocalbin 2, EF-hand calcium binding domain (RCN2), mRNA. /FEA=mRNA /GEN=RCN2 /PROD=reticulocalbin 2, EF-hand calcium bindingdomain /DB_XREF=gi:4506456 /UG=Hs.79088 reticulocalbin 2, EF-hand calcium binding domain /FL=gb:BC004892.1 gb:NM_002902.1
201487_at	213.2	P	0.000244	gb:NM_001814.1 /DEF=Homo sapiens cathepsin C (CTSC), mRNA. /FEA=mRNA /GEN=CTSC /PROD=cathepsin C /DB_XREF=gi:4503140 /UG=Hs.10029 cathepsin C /FL=gb:NM_001814.1
201488_x_at	2707.0	P	0.000244	gb:BC000717.1 /DEF=Homo sapiens, GAP-associated tyrosine phosphoprotein p62 (Sam68), clone MGC:1286, mRNA, complete cds. /FEA=mRNA /PROD=GAP-associated tyrosine phosphoprotein p62(Sam68) /DB_XREF=gi:12653852 /UG=Hs.119537 GAP-associated tyrosine phosphoprotein p62 (Sam68) /FL=gb:BC000717.1 gb:M88108.1 gb:NM_006559.1
201489_at	615.7	P	0.000244	gb:BC005020.1 /DEF=Homo sapiens, peptidylprolyl isomerase F (cyclophilin F), clone MGC:11022, mRNA, complete cds. /FEA=mRNA /PROD=peptidylprolyl isomerase F (cyclophilin F) /DB_XREF=gi:13477126 /UG=Hs.173125 peptidylprolyl isomerase F (cyclophilin F) /FL=gb:BC005020.1 gb:M80254.1 gb:NM_005729.1
201490_s_at	530.7	P	0.001221	gb:NM_005729.1 /DEF=Homo sapiens peptidylprolyl isomerase F (cyclophilin F) (PPIF), mRNA. /FEA=mRNA /GEN=PPIF /PROD=peptidylprolyl isomerase F (cyclophilin F) /DB_XREF=gi:5031986 /UG=Hs.173125 peptidylprolyl isomerase F (cyclophilin F) /FL=gb:BC005020.1 gb:M80254.1 gb:NM_005729.1
201491_at	3443.5	P	0.000244	gb:NM_012111.1 /DEF=Homo sapiens chromosome 14 open reading frame 3 (C14ORF3), mRNA. /FEA=mRNA /GEN=C14ORF3 /PROD=chromosome 14 open reading frame 3 /DB_XREF=gi:6912279 /UG=Hs.204041 chromosome 14 open reading frame 3 /FL=gb:BC000321.1 gb:NM_012111.1 gb:AF164791.1
201492_s_at	16848.5	P	0.000244	gb:NM_021104.1 /DEF=Homo sapiens ribosomal protein L41 (RPL41), mRNA. /FEA=mRNA /GEN=RPL41 /PROD=ribosomal protein L41 /DB_XREF=gi:10863874 /UG=Hs.324406 ribosomal protein L41 /FL=gb:NM_021104.1
201493_s_at	796.7	P	0.000732	Consensus includes gb:BE778078 /FEA=EST /DB_XREF=gi:10199276 /DB_XREF=est:601463189F1 /CLONE=IMAGE:3866399 /UG=Hs.6151 pumilio (Drosophila) homolog 2 /FL=gb:AF315591.1 gb:NM_015317.1
201494_at	387.4	P	0.008057	gb:NM_005040.1 /DEF=Homo sapiens prolylcarboxypeptidase (angiotensinase C) (PRCP), mRNA. /FEA=mRNA /GEN=PRCP /PROD=prolylcarboxypeptidase (angiotensinase C) /DB_XREF=gi:4826939 /UG=Hs.75693 prolylcarboxypeptidase (angiotensinase C) /FL=gb:L13977.1 gb:NM_005040.1
201495_x_at	1.1	A	0.981445	Consensus includes gb:AI889739 /FEA=EST /DB_XREF=gi:5594903 /DB_XREF=est:wo17e08.x1 /CLONE=IMAGE:2455622 /UG=Hs.78344 myosin, heavy polypeptide 11, smooth muscle /FL=gb:NM_022844.1
201496_x_at	20.1	A	0.171387	Consensus includes gb:S67238.1 /DEF=smooth muscle myosin heavy chain isoform SM2 human, umbilical cord, fetal aorta, mRNA Partial, 1078 nt. /FEA=mRNA /GEN=smooth muscle myosin heavy chain isoform SM2 /PROD=smooth muscle myosin heavy chain isoform SM2 /DB_XREF=gi:452982 /UG=Hs.78344 myosin, heavy polypeptide 11, smooth muscle /FL=gb:NM_022844.1
201497_x_at	2.1	A	0.633789	gb:NM_022844.1 /DEF=Homo sapiens myosin, heavy polypeptide 11, smooth muscle (MYH11), transcript variant SM2, mRNA. /FEA=mRNA /GEN=MYH11 /PROD=smooth muscle myosin heavy chain 11, isoformSM2 /DB_XREF=gi:13124874 /UG=Hs.78344 myosin, heavy polypeptide 11, smooth muscle /FL=gb:NM_022844.1
201498_at	1460.2	P	0.000244	Consensus includes gb:AI160440 /FEA=EST /DB_XREF=gi:3693820 /DB_XREF=est:qc08f12.x1 /CLONE=IMAGE:1709039 /UG=Hs.78683 ubiquitin specific protease 7 (herpes virus-associated) /FL=gb:NM_003470.1
201499_s_at	1112.2	P	0.000732	gb:NM_003470.1 /DEF=Homo sapiens ubiquitin specific protease 7 (herpes virus-associated) (USP7), mRNA. /FEA=mRNA /GEN=USP7 /PROD=ubiquitin specific protease 7 (herpesvirus-associated) /DB_XREF=gi:4507856 /UG=Hs.78683 ubiquitin specific protease 7 (herpes virus-associated) /FL=gb:NM_003470.1
201500_s_at	692.4	P	0.001221	gb:NM_021959.1 /DEF=Homo sapiens protein phosphatase 1, regulatory (inhibitor) subunit 11 (PPP1R11), mRNA. /FEA=mRNA /GEN=PPP1R11 /PROD=protein phosphatase 1, regulatory (inhibitor)subunit 11 /DB_XREF=gi:11386174 /UG=Hs.82887 protein phosphatase 1, regulatory (inhibitor) subunit 11 /FL=gb:NM_021959.1
201501_s_at	556.9	P	0.000244	gb:NM_002092.1 /DEF=Homo sapiens G-rich RNA sequence binding factor 1 (GRSF1), mRNA. /FEA=mRNA /GEN=GRSF1 /PROD=G-rich RNA sequence binding factor 1 /DB_XREF=gi:4504160 /UG=Hs.79295 G-rich RNA sequence binding factor 1 /FL=gb:NM_002092.1 gb:U07231.1
201502_s_at	9419.7	P	0.000244	Consensus includes gb:AI078167 /FEA=EST /DB_XREF=gi:3412575 /DB_XREF=est:oz30d08.x1 /CLONE=IMAGE:1676847 /UG=Hs.81328 nuclear factor of kappa light polypeptide gene enhancer in B-cells inhibitor, alpha /FL=gb:NM_020529.1 gb:BC002601.1 gb:BC004983.1 gb:M69043.1
201503_at	1251.2	P	0.000244	Consensus includes gb:BG500067 /FEA=EST /DB_XREF=gi:13461584 /DB_XREF=est:602545874F1 /CLONE=IMAGE:4668234 /UG=Hs.220689 Ras-GTPase-activating protein SH3-domain-binding protein /FL=gb:U32519.1 gb:NM_005754.1
201504_s_at	309.3	P	0.000244	Consensus includes gb:AI435302 /FEA=EST /DB_XREF=gi:4302230 /DB_XREF=est:ti02h06.x1 /CLONE=IMAGE:2129339 /UG=Hs.75066 translin /FL=gb:NM_004622.1
201505_at	18.5	P	0.010742	gb:NM_002291.1 /DEF=Homo sapiens laminin, beta 1 (LAMB1), mRNA. /FEA=mRNA /GEN=LAMB1 /PROD=laminin, beta 1 precursor /DB_XREF=gi:4504950 /UG=Hs.82124 laminin, beta 1 /FL=gb:M61916.1 gb:NM_002291.1
201506_at	828.1	P	0.000244	gb:NM_000358.1 /DEF=Homo sapiens transforming growth factor, beta-induced, 68kD (TGFBI), mRNA. /FEA=mRNA /GEN=TGFBI /PROD=transforming growth factor, beta-induced, 68kD /DB_XREF=gi:4507466 /UG=Hs.118787 transforming growth factor, beta-induced, 68kD /FL=gb:BC000097.1 gb:BC004972.1 gb:M77349.1 gb:NM_000358.1
201507_at	392.4	P	0.000732	gb:NM_002622.2 /DEF=Homo sapiens prefoldin 1 (PFDN1), mRNA. /FEA=mRNA /GEN=PFDN1 /PROD=prefoldin 1 /DB_XREF=gi:12408673 /UG=Hs.132881 prefoldin 1 /FL=gb:NM_002622.2
201508_at	28.6	A	0.274170	gb:NM_001552.1 /DEF=Homo sapiens insulin-like growth factor-binding protein 4 (IGFBP4), mRNA. /FEA=mRNA /GEN=IGFBP4 /PROD=insulin-like growth factor-binding protein 4 /DB_XREF=gi:10835020 /UG=Hs.1516 insulin-like growth factor-binding protein 4 /FL=gb:NM_001552.1 gb:M62403.1
201509_at	277.8	P	0.000244	gb:NM_006899.1 /DEF=Homo sapiens isocitrate dehydrogenase 3 (NAD+) beta (IDH3B), mRNA. /FEA=mRNA /GEN=IDH3B /PROD=isocitrate dehydrogenase 3 (NAD+) beta /DB_XREF=gi:5901981 /UG=Hs.155410 isocitrate dehydrogenase 3 (NAD+) beta /FL=gb:BC001960.1 gb:U49283.1 gb:NM_006899.1
201510_at	537.1	P	0.000244	gb:AF017307.1 /DEF=Homo sapiens Ets-related transcription factor (ERT) mRNA, complete cds. /FEA=mRNA /GEN=ERT /PROD=Ets-related transcription factor /DB_XREF=gi:2338755 /UG=Hs.166096 E74-like factor 3 (ets domain transcription factor, epithelial-specific ) /FL=gb:BC003569.1 gb:U66894.1 gb:U73843.1 gb:AF017307.1 gb:AF016295.1 gb:U97156.1 gb:NM_004433.1
201511_at	562.4	P	0.000244	gb:NM_001087.1 /DEF=Homo sapiens angio-associated, migratory cell protein (AAMP), mRNA. /FEA=mRNA /GEN=AAMP /PROD=angio-associated, migratory cell protein /DB_XREF=gi:4557228 /UG=Hs.83347 angio-associated, migratory cell protein /FL=gb:NM_001087.1 gb:M95627.1
201512_s_at	258.8	P	0.004150	gb:BC003633.1 /DEF=Homo sapiens, translocase of outer mitochondrial membrane 70 (yeast) homolog A, clone MGC:3766, mRNA, complete cds. /FEA=mRNA /PROD=translocase of outer mitochondrial membrane 70(yeast) homolog A /DB_XREF=gi:13177705 /UG=Hs.21198 translocase of outer mitochondrial membrane 70 (yeast) homolog A /FL=gb:BC003633.1 gb:AB018262.1 gb:NM_014820.1
201513_at	137.5	P	0.000244	Consensus includes gb:AI659180 /FEA=EST /DB_XREF=gi:4762750 /DB_XREF=est:tu02c06.x1 /CLONE=IMAGE:2249866 /UG=Hs.75066 translin /FL=gb:NM_004622.1
201514_s_at	423.7	P	0.010742	gb:NM_005754.1 /DEF=Homo sapiens Ras-GTPase-activating protein SH3-domain-binding protein (G3BP), mRNA. /FEA=mRNA /GEN=G3BP /PROD=Ras-GTPase-activating protein SH3-domain-bindingprotein /DB_XREF=gi:5031702 /UG=Hs.220689 Ras-GTPase-activating protein SH3-domain-binding protein /FL=gb:U32519.1 gb:NM_005754.1
201515_s_at	1041.6	P	0.000244	gb:NM_004622.1 /DEF=Homo sapiens translin (TSN), mRNA. /FEA=mRNA /GEN=TSN /PROD=translin /DB_XREF=gi:4759269 /UG=Hs.75066 translin /FL=gb:NM_004622.1
201516_at	557.7	P	0.000732	gb:NM_003132.1 /DEF=Homo sapiens spermidine synthase (SRM), mRNA. /FEA=mRNA /GEN=SRM /PROD=spermidine synthase /DB_XREF=gi:4507208 /UG=Hs.76244 spermidine synthase /FL=gb:BC000309.1 gb:NM_003132.1 gb:M34338.1
201517_at	1197.0	P	0.000244	gb:BC001255.1 /DEF=Homo sapiens, nuclear cap binding protein subunit 2, 20kD, clone MGC:4991, mRNA, complete cds. /FEA=mRNA /PROD=nuclear cap binding protein subunit 2, 20kD /DB_XREF=gi:12654824 /UG=Hs.240770 nuclear cap binding protein subunit 2, 20kD /FL=gb:D59253.1 gb:BC001255.1 gb:NM_007362.1
201518_at	4031.0	P	0.000244	gb:NM_006807.1 /DEF=Homo sapiens chromobox homolog 1 (Drosophila HP1 beta) (CBX1), mRNA. /FEA=mRNA /GEN=CBX1 /PROD=chromobox homolog 1 (Drosophila HP1 beta) /DB_XREF=gi:5803075 /UG=Hs.77254 chromobox homolog 1 (Drosophila HP1 beta) /FL=gb:U35451.1 gb:BC002609.1 gb:NM_006807.1
201519_at	996.4	P	0.000244	gb:NM_014820.1 /DEF=Homo sapiens translocase of outer mitochondrial membrane 70 (yeast) homolog A (TOMM70A), mRNA. /FEA=mRNA /GEN=TOMM70A /PROD=translocase of outer mitochondrial membrane 70(yeast) homolog A /DB_XREF=gi:7662672 /UG=Hs.21198 translocase of outer mitochondrial membrane 70 (yeast) homolog A /FL=gb:BC003633.1 gb:AB018262.1 gb:NM_014820.1
201520_s_at	1164.4	P	0.000244	Consensus includes gb:BF034561 /FEA=EST /DB_XREF=gi:10742273 /DB_XREF=est:601455476F1 /CLONE=IMAGE:3859242 /UG=Hs.79295 G-rich RNA sequence binding factor 1 /FL=gb:NM_002092.1 gb:U07231.1
201521_s_at	743.3	P	0.000732	gb:NM_007362.1 /DEF=Homo sapiens nuclear cap binding protein subunit 2, 20kD (NCBP2), mRNA. /FEA=mRNA /GEN=NCBP2 /PROD=nuclear cap binding protein subunit 2, 20kD /DB_XREF=gi:6679063 /UG=Hs.240770 nuclear cap binding protein subunit 2, 20kD /FL=gb:D59253.1 gb:BC001255.1 gb:NM_007362.1
201522_x_at	26.2	A	0.111572	gb:NM_003097.2 /DEF=Homo sapiens small nuclear ribonucleoprotein polypeptide N (SNRPN), transcript variant 1, mRNA. /FEA=mRNA /GEN=SNRPN /PROD=small nuclear ribonucleoprotein polypeptide N /DB_XREF=gi:13027651 /UG=Hs.48375 small nuclear ribonucleoprotein polypeptide N /FL=gb:U41303.1 gb:NM_003097.2 gb:BC003180.1 gb:J04615.1
201523_x_at	1084.0	P	0.000244	Consensus includes gb:BE262760 /FEA=EST /DB_XREF=gi:9136144 /DB_XREF=est:601153762F1 /CLONE=IMAGE:3509895 /UG=Hs.75355 ubiquitin-conjugating enzyme E2N (homologous to yeast UBC13) /FL=gb:D83004.1 gb:BC000396.1 gb:BC003365.1 gb:NM_003348.1
201524_x_at	2637.9	P	0.000244	gb:NM_003348.1 /DEF=Homo sapiens ubiquitin-conjugating enzyme E2N (homologous to yeast UBC13) (UBE2N), mRNA. /FEA=mRNA /GEN=UBE2N /PROD=ubiquitin-conjugating enzyme E2N (homologous toyeast UBC13) /DB_XREF=gi:4507792 /UG=Hs.75355 ubiquitin-conjugating enzyme E2N (homologous to yeast UBC13) /FL=gb:D83004.1 gb:BC000396.1 gb:BC003365.1 gb:NM_003348.1
201525_at	155.7	P	0.000732	gb:NM_001647.1 /DEF=Homo sapiens apolipoprotein D (APOD), mRNA. /FEA=mRNA /GEN=APOD /PROD=apolipoprotein D precursor /DB_XREF=gi:4502162 /UG=Hs.75736 apolipoprotein D /FL=gb:J02611.1 gb:NM_001647.1
201526_at	732.7	P	0.000732	gb:NM_001662.2 /DEF=Homo sapiens ADP-ribosylation factor 5 (ARF5), mRNA. /FEA=mRNA /GEN=ARF5 /PROD=ADP-ribosylation factor 5 /DB_XREF=gi:6995999 /UG=Hs.77541 ADP-ribosylation factor 5 /FL=gb:BC003043.1 gb:M57567.1 gb:NM_001662.2
201527_at	2116.0	P	0.000244	gb:NM_004231.1 /DEF=Homo sapiens ATPase, vacuolar, 14 kD (ATP6S14), mRNA. /FEA=mRNA /GEN=ATP6S14 /PROD=ATPase, vacuolar, 14 kD /DB_XREF=gi:4757819 /UG=Hs.78089 ATPase, vacuolar, 14 kD /FL=gb:D49400.1 gb:NM_004231.1
201528_at	989.3	P	0.000244	Consensus includes gb:BG398414 /FEA=EST /DB_XREF=gi:13291862 /DB_XREF=est:602439888F1 /CLONE=IMAGE:4566380 /UG=Hs.84318 replication protein A1 (70kD) /FL=gb:M63488.1 gb:NM_002945.1
201529_s_at	406.5	P	0.000244	gb:NM_002945.1 /DEF=Homo sapiens replication protein A1 (70kD) (RPA1), mRNA. /FEA=mRNA /GEN=RPA1 /PROD=replication protein A1 (70kD) /DB_XREF=gi:4506582 /UG=Hs.84318 replication protein A1 (70kD) /FL=gb:M63488.1 gb:NM_002945.1
201530_x_at	8672.0	P	0.000244	gb:NM_001416.1 /DEF=Homo sapiens eukaryotic translation initiation factor 4A, isoform 1 (EIF4A1), mRNA. /FEA=mRNA /GEN=EIF4A1 /PROD=eukaryotic translation initiation factor 4A,isoform 1 /DB_XREF=gi:4503528 /UG=Hs.129673 eukaryotic translation initiation factor 4A, isoform 1 /FL=gb:NM_001416.1
201531_at	385.5	P	0.000732	gb:NM_003407.1 /DEF=Homo sapiens zinc finger protein homologous to Zfp-36 in mouse (ZFP36), mRNA. /FEA=mRNA /GEN=ZFP36 /PROD=zinc finger protein homologous to Zfp-36 inmouse /DB_XREF=gi:4507960 /UG=Hs.1665 zinc finger protein homologous to Zfp-36 in mouse /FL=gb:M92843.1 gb:M63625.1 gb:NM_003407.1
201532_at	4275.3	P	0.000244	gb:NM_002788.1 /DEF=Homo sapiens proteasome (prosome, macropain) subunit, alpha type, 3 (PSMA3), mRNA. /FEA=mRNA /GEN=PSMA3 /PROD=proteasome (prosome, macropain) subunit, alphatype, 3 /DB_XREF=gi:4506182 /UG=Hs.167106 proteasome (prosome, macropain) subunit, alpha type, 3 /FL=gb:BC005265.1 gb:NM_002788.1
201533_at	2621.4	P	0.000244	gb:NM_001904.1 /DEF=Homo sapiens catenin (cadherin-associated protein), beta 1 (88kD) (CTNNB1), mRNA. /FEA=mRNA /GEN=CTNNB1 /PROD=catenin (cadherin-associated protein), beta 1(88kD) /DB_XREF=gi:4503130 /UG=Hs.171271 catenin (cadherin-associated protein), beta 1 (88kD) /FL=gb:NM_001904.1
201534_s_at	401.6	P	0.000732	gb:AF044221.1 /DEF=Homo sapiens HCG-1 protein (HCG-1) mRNA, complete cds. /FEA=mRNA /GEN=HCG-1 /PROD=HCG-1 protein /DB_XREF=gi:4105251 /UG=Hs.173091 ubiquitin-like 3 /FL=gb:AF044221.1 gb:AL080177.1 gb:NM_007106.1
201535_at	886.0	P	0.000244	gb:NM_007106.1 /DEF=Homo sapiens ubiquitin-like 3 (UBL3), mRNA. /FEA=mRNA /GEN=UBL3 /PROD=ubiquitin-like 3 /DB_XREF=gi:6005927 /UG=Hs.173091 ubiquitin-like 3 /FL=gb:AF044221.1 gb:AL080177.1 gb:NM_007106.1
201536_at	402.3	P	0.000244	Consensus includes gb:AL048503 /FEA=EST /DB_XREF=gi:5936534 /DB_XREF=est:DKFZp586M1524_s1 /CLONE=DKFZp586M1524 /UG=Hs.181046 dual specificity phosphatase 3 (vaccinia virus phosphatase VH1-related) /FL=gb:BC002682.1 gb:L05147.1 gb:NM_004090.1
201537_s_at	122.7	P	0.000244	gb:BC002682.1 /DEF=Homo sapiens, dual specificity phosphatase 3 (vaccinia virus phosphatase VH1-related), clone MGC:3615, mRNA, complete cds. /FEA=mRNA /PROD=dual specificity phosphatase 3 (vaccinia virusphosphatase VH1-related) /DB_XREF=gi:12803692 /UG=Hs.181046 dual specificity phosphatase 3 (vaccinia virus phosphatase VH1-related) /FL=gb:BC002682.1 gb:L05147.1 gb:NM_004090.1
201538_s_at	88.7	P	0.000244	gb:NM_004090.1 /DEF=Homo sapiens dual specificity phosphatase 3 (vaccinia virus phosphatase VH1-related) (DUSP3), mRNA. /FEA=mRNA /GEN=DUSP3 /PROD=dual specificity phosphatase 3 /DB_XREF=gi:4758207 /UG=Hs.181046 dual specificity phosphatase 3 (vaccinia virus phosphatase VH1-related) /FL=gb:BC002682.1 gb:L05147.1 gb:NM_004090.1
201539_s_at	25.0	P	0.018555	gb:U29538.1 /DEF=Human heart protein with four and a half LIM domains (FHL-1) mRNA, complete cds. /FEA=mRNA /GEN=FHL-1 /DB_XREF=gi:2078479 /UG=Hs.239069 four and a half LIM domains 1 /FL=gb:U29538.1 gb:U60115.1 gb:NM_001449.1
201540_at	182.0	P	0.000244	gb:NM_001449.1 /DEF=Homo sapiens four and a half LIM domains 1 (FHL1), mRNA. /FEA=mRNA /GEN=FHL1 /PROD=four and a half LIM domains 1 /DB_XREF=gi:4503720 /UG=Hs.239069 four and a half LIM domains 1 /FL=gb:U29538.1 gb:U60115.1 gb:NM_001449.1
201541_s_at	1242.1	P	0.000244	gb:NM_006349.1 /DEF=Homo sapiens putative cyclin G1 interacting protein (CG1I), mRNA. /FEA=mRNA /GEN=CG1I /PROD=putative cyclin G1 interacting protein /DB_XREF=gi:5453616 /UG=Hs.10028 putative cyclin G1 interacting protein /FL=gb:U61837.1 gb:NM_006349.1
201542_at	962.4	P	0.000244	gb:AY008268.1 /DEF=Homo sapiens GTP-binding protein SAR1 (SAR1) mRNA, complete cds. /FEA=mRNA /GEN=SAR1 /PROD=GTP-binding protein SAR1 /DB_XREF=gi:10445220 /UG=Hs.110796 SAR1 protein /FL=gb:AY008268.1 gb:AL136724.1 gb:AF261717.1 gb:NM_020150.1
201543_s_at	640.9	P	0.000244	gb:NM_020150.1 /DEF=Homo sapiens SAR1 protein (SAR1), mRNA. /FEA=mRNA /GEN=SAR1 /PROD=SAR1 protein /DB_XREF=gi:9910541 /UG=Hs.110796 SAR1 protein /FL=gb:AY008268.1 gb:AL136724.1 gb:AF261717.1 gb:NM_020150.1
201544_x_at	2975.8	P	0.000244	Consensus includes gb:BF675004 /FEA=EST /DB_XREF=gi:11948899 /DB_XREF=est:602138088F1 /CLONE=IMAGE:4274564 /UG=Hs.117176 poly(A)-binding protein, nuclear 1 /FL=gb:NM_004643.1
201545_s_at	503.6	P	0.001953	gb:NM_004643.1 /DEF=Homo sapiens poly(A)-binding protein, nuclear 1 (PABPN1), mRNA. /FEA=mRNA /GEN=PABPN1 /PROD=poly(A)-binding protein, nuclear 1 /DB_XREF=gi:4758875 /UG=Hs.117176 poly(A)-binding protein, nuclear 1 /FL=gb:NM_004643.1
201546_at	1119.5	P	0.000244	gb:NM_004238.1 /DEF=Homo sapiens thyroid hormone receptor interactor 12 (TRIP12), mRNA. /FEA=mRNA /GEN=TRIP12 /PROD=thyroid hormone receptor interactor 12 /DB_XREF=gi:10863902 /UG=Hs.138617 thyroid hormone receptor interactor 12 /FL=gb:NM_004238.1 gb:D28476.1
201547_at	2.3	A	0.904785	Consensus includes gb:AA729218 /FEA=EST /DB_XREF=gi:2750577 /DB_XREF=est:nx35a04.s1 /CLONE=IMAGE:1258062 /UG=Hs.143323 putative DNAchromatin binding motif /FL=gb:NM_006618.1
201548_s_at	862.3	P	0.000244	Consensus includes gb:W02593 /FEA=EST /DB_XREF=gi:1274571 /DB_XREF=est:za51e06.r1 /CLONE=IMAGE:296098 /UG=Hs.143323 putative DNAchromatin binding motif /FL=gb:NM_006618.1
201549_x_at	1821.0	P	0.000244	gb:NM_006618.1 /DEF=Homo sapiens putative DNAchromatin binding motif (PLU-1), mRNA. /FEA=mRNA /GEN=PLU-1 /PROD=putative DNAchromatin binding motif /DB_XREF=gi:5729977 /UG=Hs.143323 putative DNAchromatin binding motif /FL=gb:NM_006618.1
201550_x_at	13392.2	P	0.000244	gb:NM_001614.2 /DEF=Homo sapiens actin, gamma 1 (ACTG1), mRNA. /FEA=mRNA /GEN=ACTG1 /PROD=actin, gamma 1 propeptide /DB_XREF=gi:11038618 /UG=Hs.14376 actin, gamma 1 /FL=gb:NM_001614.2 gb:BC000292.1
201551_s_at	136.1	P	0.005859	gb:J03263.1 /DEF=Human lysosome-associated membrane glycoprotein (lamp A) mRNA, complete cds. /FEA=mRNA /GEN=LAMP1 /DB_XREF=gi:187178 /UG=Hs.150101 lysosomal-associated membrane protein 1 /FL=gb:J04182.1 gb:J03263.1 gb:NM_005561.2
201552_at	1526.8	P	0.000244	gb:NM_005561.2 /DEF=Homo sapiens lysosomal-associated membrane protein 1 (LAMP1), mRNA. /FEA=mRNA /GEN=LAMP1 /PROD=lysosomal-associated membrane protein 1 /DB_XREF=gi:7669500 /UG=Hs.150101 lysosomal-associated membrane protein 1 /FL=gb:J04182.1 gb:J03263.1 gb:NM_005561.2
201553_s_at	3697.6	P	0.000244	gb:NM_005561.2 /DEF=Homo sapiens lysosomal-associated membrane protein 1 (LAMP1), mRNA. /FEA=mRNA /GEN=LAMP1 /PROD=lysosomal-associated membrane protein 1 /DB_XREF=gi:7669500 /UG=Hs.150101 lysosomal-associated membrane protein 1 /FL=gb:J04182.1 gb:J03263.1 gb:NM_005561.2
201554_x_at	1513.8	P	0.000244	gb:NM_004130.1 /DEF=Homo sapiens glycogenin (GYG), mRNA. /FEA=mRNA /GEN=GYG /PROD=glycogenin /DB_XREF=gi:4758491 /UG=Hs.174071 glycogenin /FL=gb:U44131.1 gb:BC000033.1 gb:NM_004130.1 gb:U31525.1
201555_at	591.5	P	0.000244	gb:NM_002388.2 /DEF=Homo sapiens minichromosome maintenance deficient (S. cerevisiae) 3 (MCM3), mRNA. /FEA=mRNA /GEN=MCM3 /PROD=minichromosome maintenance deficient (S.cerevisiae) 3 /DB_XREF=gi:6631094 /UG=Hs.179565 minichromosome maintenance deficient (S. cerevisiae) 3 /FL=gb:BC001626.1 gb:NM_002388.2 gb:D38073.1
201556_s_at	14.1	P	0.018555	gb:BC002737.1 /DEF=Homo sapiens, vesicle-associated membrane protein 2, clone MGC:3377, mRNA, complete cds. /FEA=mRNA /PROD=vesicle-associated membrane protein 2 /DB_XREF=gi:12803794 /UG=Hs.194534 vesicle-associated membrane protein 2 (synaptobrevin 2) /FL=gb:BC002737.1 gb:NM_014232.1
201557_at	40.8	M	0.056152	gb:NM_014232.1 /DEF=Homo sapiens vesicle-associated membrane protein 2 (synaptobrevin 2) (VAMP2), mRNA. /FEA=mRNA /GEN=VAMP2 /PROD=vesicle-associated membrane protein 2(synaptobrevin 2) /DB_XREF=gi:7657674 /UG=Hs.194534 vesicle-associated membrane protein 2 (synaptobrevin 2) /FL=gb:BC002737.1 gb:NM_014232.1
201558_at	2745.4	P	0.000244	gb:NM_003610.1 /DEF=Homo sapiens RAE1 (RNA export 1, S.pombe) homolog (RAE1), mRNA. /FEA=mRNA /GEN=RAE1 /PROD=RAE1 (RNA export 1, S.pombe) homolog /DB_XREF=gi:4506398 /UG=Hs.196209 RAE1 (RNA export 1, S.pombe) homolog /FL=gb:U84720.1 gb:NM_003610.1
201559_s_at	127.8	P	0.000244	gb:AF109196.1 /DEF=Homo sapiens intracellular chloride channel p64H1 mRNA, complete cds. /FEA=mRNA /PROD=intracellular chloride channel p64H1 /DB_XREF=gi:4588523 /UG=Hs.25035 chloride intracellular channel 4 /FL=gb:AF109196.1 gb:AF097330.1 gb:AL117424.1 gb:NM_013943.1
201560_at	1706.6	P	0.000244	gb:NM_013943.1 /DEF=Homo sapiens chloride intracellular channel 4 (CLIC4), mRNA. /FEA=mRNA /GEN=CLIC4 /PROD=chloride intracellular channel 4 /DB_XREF=gi:7330334 /UG=Hs.25035 chloride intracellular channel 4 /FL=gb:AF109196.1 gb:AF097330.1 gb:AL117424.1 gb:NM_013943.1
201561_s_at	517.3	P	0.000244	gb:NM_014944.1 /DEF=Homo sapiens KIAA0911 protein (KIAA0911), mRNA. /FEA=mRNA /GEN=KIAA0911 /PROD=KIAA0911 protein /DB_XREF=gi:7662373 /UG=Hs.29665 KIAA0911 protein /FL=gb:AB020718.1 gb:NM_014944.1
201562_s_at	138.7	P	0.004150	gb:NM_003104.1 /DEF=Homo sapiens sorbitol dehydrogenase (SORD), mRNA. /FEA=mRNA /GEN=SORD /PROD=sorbitol dehydrogenase /DB_XREF=gi:4507154 /UG=Hs.878 sorbitol dehydrogenase /FL=gb:NM_003104.1 gb:L29008.1 gb:U07361.1
201563_at	588.2	P	0.000244	gb:L29008.1 /DEF=Human L-iditol-2 dehydrogenase mRNA, complete cds. /FEA=mRNA /PROD=L-iditol-2 dehydrogenase /DB_XREF=gi:496077 /UG=Hs.878 sorbitol dehydrogenase /FL=gb:NM_003104.1 gb:L29008.1 gb:U07361.1
201564_s_at	56.1	P	0.002930	gb:NM_003088.1 /DEF=Homo sapiens singed (Drosophila)-like (sea urchin fascin homolog like) (SNL), mRNA. /FEA=mRNA /GEN=SNL /PROD=singed (Drosophila)-like (sea urchin fascinhomolog like) /DB_XREF=gi:4507114 /UG=Hs.118400 singed (Drosophila)-like (sea urchin fascin homolog like) /FL=gb:BC000521.1 gb:NM_003088.1 gb:U03057.1 gb:U09873.1
201565_s_at	2532.7	P	0.000244	gb:NM_002166.1 /DEF=Homo sapiens inhibitor of DNA binding 2, dominant negative helix-loop-helix protein (ID2), mRNA. /FEA=mRNA /GEN=ID2 /PROD=inhibitor of DNA binding 2, dominant negativehelix-loop-helix protein /DB_XREF=gi:4504570 /UG=Hs.180919 inhibitor of DNA binding 2, dominant negative helix-loop-helix protein /FL=gb:M97796.1 gb:NM_002166.1 gb:D13891.1
201566_x_at	309.5	P	0.000732	gb:D13891.1 /DEF=Human mRNA for Id-2H, complete cds. /FEA=mRNA /GEN=Id-2H /PROD=Id-2H /DB_XREF=gi:464183 /UG=Hs.180919 inhibitor of DNA binding 2, dominant negative helix-loop-helix protein /FL=gb:M97796.1 gb:NM_002166.1 gb:D13891.1
201567_s_at	974.5	P	0.000244	gb:NM_002078.2 /DEF=Homo sapiens golgi autoantigen, golgin subfamily a, 4 (GOLGA4), mRNA. /FEA=mRNA /GEN=GOLGA4 /PROD=golgi autoantigen, golgin subfamily a, 4 /DB_XREF=gi:6715599 /UG=Hs.183773 golgi autoantigen, golgin subfamily a, 4 /FL=gb:U41740.1 gb:NM_002078.2
201568_at	4566.2	P	0.000244	gb:NM_014402.1 /DEF=Homo sapiens low molecular mass ubiquinone-binding protein (9.5kD) (QP-C), mRNA. /FEA=mRNA /GEN=QP-C /PROD=low molecular mass ubiquinone-binding protein /DB_XREF=gi:7657485 /UG=Hs.3709 low molecular mass ubiquinone-binding protein (9.5kD) /FL=gb:BC001390.1 gb:D50369.1 gb:NM_014402.1
201569_s_at	532.6	P	0.001221	gb:NM_015380.1 /DEF=Homo sapiens CGI-51 protein (CGI-51), mRNA. /FEA=mRNA /GEN=CGI-51 /PROD=CGI-51 protein /DB_XREF=gi:7661541 /UG=Hs.4877 CGI-51 protein /FL=gb:AF151809.1 gb:NM_015380.1
201570_at	570.3	P	0.000244	gb:NM_015380.1 /DEF=Homo sapiens CGI-51 protein (CGI-51), mRNA. /FEA=mRNA /GEN=CGI-51 /PROD=CGI-51 protein /DB_XREF=gi:7661541 /UG=Hs.4877 CGI-51 protein /FL=gb:AF151809.1 gb:NM_015380.1
201571_s_at	173.4	P	0.000244	Consensus includes gb:AI656493 /FEA=EST /DB_XREF=gi:4740472 /DB_XREF=est:tt51d09.x1 /CLONE=IMAGE:2244305 /UG=Hs.76894 dCMP deaminase /FL=gb:L12136.1 gb:NM_001921.1
201572_x_at	393.1	P	0.000244	gb:NM_001921.1 /DEF=Homo sapiens dCMP deaminase (DCTD), mRNA. /FEA=mRNA /GEN=DCTD /PROD=dCMP deaminase /DB_XREF=gi:4503276 /UG=Hs.76894 dCMP deaminase /FL=gb:L12136.1 gb:NM_001921.1
201573_s_at	754.6	P	0.000244	gb:M75715.1 /DEF=Human TB3-1 mRNA, complete cds. /FEA=mRNA /PROD=TB3-1 /DB_XREF=gi:338686 /UG=Hs.77324 eukaryotic translation termination factor 1 /FL=gb:U90176.1 gb:M75715.1 gb:NM_004730.1
201574_at	2077.6	P	0.000244	gb:NM_004730.1 /DEF=Homo sapiens eukaryotic translation termination factor 1 (ETF1), mRNA. /FEA=mRNA /GEN=ETF1 /PROD=eukaryotic translation termination factor 1 /DB_XREF=gi:4759033 /UG=Hs.77324 eukaryotic translation termination factor 1 /FL=gb:U90176.1 gb:M75715.1 gb:NM_004730.1
201575_at	1785.3	P	0.000244	gb:NM_012245.1 /DEF=Homo sapiens SKI-INTERACTING PROTEIN (SNW1), mRNA. /FEA=mRNA /GEN=SNW1 /PROD=SKI-INTERACTING PROTEIN /DB_XREF=gi:6912675 /UG=Hs.79008 SKI-INTERACTING PROTEIN /FL=gb:U51432.1 gb:AF045184.1 gb:NM_012245.1
201576_s_at	832.1	P	0.000732	gb:NM_000404.1 /DEF=Homo sapiens galactosidase, beta 1 (GLB1), mRNA. /FEA=mRNA /GEN=GLB1 /PROD=galactosidase, beta 1 /DB_XREF=gi:10834965 /UG=Hs.79222 galactosidase, beta 1 /FL=gb:NM_000404.1 gb:M27507.1 gb:M22590.1 gb:M34423.1
201577_at	5641.1	P	0.000244	gb:NM_000269.1 /DEF=Homo sapiens non-metastatic cells 1, protein (NM23A) expressed in (NME1), mRNA. /FEA=mRNA /GEN=NME1 /PROD=non-metastatic cells 1 protein /DB_XREF=gi:4557796 /UG=Hs.118638 non-metastatic cells 1, protein (NM23A) expressed in /FL=gb:BC000293.1 gb:NM_000269.1
201578_at	525.3	P	0.000732	gb:NM_005397.1 /DEF=Homo sapiens podocalyxin-like (PODXL), mRNA. /FEA=mRNA /GEN=PODXL /PROD=podocalyxin-like /DB_XREF=gi:4885556 /UG=Hs.16426 podocalyxin-like /FL=gb:U97519.1 gb:NM_005397.1
201579_at	385.9	P	0.000732	gb:NM_005245.1 /DEF=Homo sapiens FAT tumor suppressor (Drosophila) homolog (FAT), mRNA. /FEA=mRNA /GEN=FAT /PROD=FAT tumor suppressor precursor /DB_XREF=gi:4885228 /UG=Hs.166994 FAT tumor suppressor (Drosophila) homolog /FL=gb:NM_005245.1
201580_s_at	190.5	P	0.000244	Consensus includes gb:AL544094 /FEA=EST /DB_XREF=gi:12876573 /DB_XREF=est:AL544094 /CLONE=CS0DI004YG20 (3 prime) /UG=Hs.169358 hypothetical protein /FL=gb:NM_021156.1
201581_at	419.4	P	0.000244	Consensus includes gb:BF572868 /FEA=EST /DB_XREF=gi:11646580 /DB_XREF=est:602079440F2 /CLONE=IMAGE:4254176 /UG=Hs.169358 hypothetical protein /FL=gb:NM_021156.1
201582_at	190.2	P	0.000244	Consensus includes gb:AL121900 /DEF=Human DNA sequence from clone RP11-379J5 on chromosome 20 Contains the last exon of the SEC23B gene for Sec23 (S. cerevisiae) homolog B, a putative novel gene, the 5 end of the gene for a novel protein similar to bacterial histidyl-tRNA synthetas... /FEA=mRNA /DB_XREF=gi:11121203 /UG=Hs.173497 Sec23 (S. cerevisiae) homolog B /FL=gb:BC005404.1 gb:NM_006363.1
201583_s_at	483.8	P	0.000244	gb:NM_006363.1 /DEF=Homo sapiens Sec23 (S. cerevisiae) homolog B (SEC23B), mRNA. /FEA=mRNA /GEN=SEC23B /PROD=Sec23 (S. cerevisiae) homolog B /DB_XREF=gi:5454043 /UG=Hs.173497 Sec23 (S. cerevisiae) homolog B /FL=gb:BC005404.1 gb:NM_006363.1
201584_s_at	2144.3	P	0.000732	gb:NM_005804.1 /DEF=Homo sapiens nuclear RNA helicase, DECD variant of DEAD box family (DDXL), mRNA. /FEA=mRNA /GEN=DDXL /PROD=nuclear RNA helicase, DECD variant of DEAD boxfamily /DB_XREF=gi:5031658 /UG=Hs.179606 nuclear RNA helicase, DECD variant of DEAD box family /FL=gb:BC001009.1 gb:U90426.1 gb:NM_005804.1
201585_s_at	826.1	P	0.000732	Consensus includes gb:BG035151 /FEA=EST /DB_XREF=gi:12428997 /DB_XREF=est:602324851F1 /CLONE=IMAGE:4412917 /UG=Hs.180610 splicing factor prolineglutamine rich (polypyrimidine tract-binding protein-associated) /FL=gb:NM_005066.1
201586_s_at	3007.4	P	0.000244	gb:NM_005066.1 /DEF=Homo sapiens splicing factor prolineglutamine rich (polypyrimidine tract-binding protein-associated) (SFPQ), mRNA. /FEA=mRNA /GEN=SFPQ /PROD=splicing factor prolineglutamine rich(polypyrimidine tract-binding protein-associated) /DB_XREF=gi:4826997 /UG=Hs.180610 splicing factor prolineglutamine rich (polypyrimidine tract-binding protein-associated) /FL=gb:NM_005066.1
201587_s_at	3330.5	P	0.000244	gb:NM_001569.2 /DEF=Homo sapiens interleukin-1 receptor-associated kinase 1 (IRAK1), mRNA. /FEA=mRNA /GEN=IRAK1 /PROD=interleukin-1 receptor-associated kinase 1 /DB_XREF=gi:4755143 /UG=Hs.182018 interleukin-1 receptor-associated kinase 1 /FL=gb:L76191.1 gb:NM_001569.2
201588_at	2016.7	P	0.000732	gb:NM_004786.1 /DEF=Homo sapiens thioredoxin-like, 32kD (TXNL), mRNA. /FEA=mRNA /GEN=TXNL /PROD=thioredoxin-like, 32kD /DB_XREF=gi:4759273 /UG=Hs.18792 thioredoxin-like, 32kD /FL=gb:BC001156.1 gb:AF003938.1 gb:AF051896.1 gb:AF052659.1 gb:NM_004786.1
201589_at	1091.4	P	0.000244	Consensus includes gb:D80000.1 /DEF=Human mRNA for KIAA0178 gene, partial cds. /FEA=mRNA /GEN=KIAA0178 /DB_XREF=gi:1136415 /UG=Hs.211602 SMC1 (structural maintenance of chromosomes 1, yeast)-like 1 /FL=gb:NM_006306.1
201590_x_at	5751.2	P	0.000244	gb:NM_004039.1 /DEF=Homo sapiens annexin A2 (ANXA2), mRNA. /FEA=mRNA /GEN=ANXA2 /PROD=annexin A2 /DB_XREF=gi:4757755 /UG=Hs.217493 annexin A2 /FL=gb:BC001748.1 gb:D00017.1 gb:NM_004039.1
201591_s_at	618.2	P	0.000732	gb:NM_007184.1 /DEF=Homo sapiens imidazoline receptor candidate (I-1), mRNA. /FEA=mRNA /GEN=I-1 /PROD=imidazoline receptor candidate /DB_XREF=gi:6005787 /UG=Hs.26285 imidazoline receptor candidate /FL=gb:AF082516.1 gb:NM_007184.1
201592_at	4258.6	P	0.000244	gb:NM_003756.1 /DEF=Homo sapiens eukaryotic translation initiation factor 3, subunit 3 (gamma, 40kD) (EIF3S3), mRNA. /FEA=mRNA /GEN=EIF3S3 /PROD=eukaryotic translation initiation factor 3,subunit 3 (gamma, 40kD) /DB_XREF=gi:4503514 /UG=Hs.58189 eukaryotic translation initiation factor 3, subunit 3 (gamma, 40kD) /FL=gb:BC000386.1 gb:U54559.1 gb:NM_003756.1
201593_s_at	2255.4	P	0.000244	Consensus includes gb:AV716798 /FEA=EST /DB_XREF=gi:10813950 /DB_XREF=est:AV716798 /CLONE=DCBAKB02 /UG=Hs.6375 uncharacterized hypothalamus protein HT010 /FL=gb:AF220184.1 gb:NM_018471.1
201594_s_at	490.4	P	0.000244	gb:NM_005134.1 /DEF=Homo sapiens protein phosphatase 4, regulatory subunit 1 (PPP4R1), mRNA. /FEA=mRNA /GEN=PPP4R1 /PROD=protein phosphatase 4, regulatory subunit 1 /DB_XREF=gi:4826933 /UG=Hs.3382 protein phosphatase 4, regulatory subunit 1 /FL=gb:AF111106.1 gb:NM_005134.1 gb:AF100744.1
201595_s_at	1120.7	P	0.000244	gb:NM_018471.1 /DEF=Homo sapiens uncharacterized hypothalamus protein HT010 (HT010), mRNA. /FEA=mRNA /GEN=HT010 /PROD=uncharacterized hypothalamus protein HT010 /DB_XREF=gi:8923807 /UG=Hs.6375 uncharacterized hypothalamus protein HT010 /FL=gb:AF220184.1 gb:NM_018471.1
201596_x_at	16484.6	P	0.000244	gb:NM_000224.1 /DEF=Homo sapiens keratin 18 (KRT18), mRNA. /FEA=mRNA /GEN=KRT18 /PROD=keratin 18 /DB_XREF=gi:4557887 /UG=Hs.65114 keratin 18 /FL=gb:BC000698.1 gb:BC000180.2 gb:BC004253.1 gb:M26326.1 gb:NM_000224.1
201597_at	4356.9	P	0.000244	gb:NM_001865.1 /DEF=Homo sapiens cytochrome c oxidase subunit VIIa polypeptide 2 (liver) (COX7A2), nuclear gene encoding mitochondrial protein, mRNA. /FEA=mRNA /GEN=COX7A2 /PROD=cytochrome c oxidase subunit VIIa polypeptide 2(liver) /DB_XREF=gi:4502988 /UG=Hs.70312 cytochrome c oxidase subunit VIIa polypeptide 2 (liver) /FL=gb:NM_001865.1
201598_s_at	696.7	P	0.000732	gb:NM_001567.2 /DEF=Homo sapiens inositol polyphosphate phosphatase-like 1 (INPPL1), mRNA. /FEA=mRNA /GEN=INPPL1 /PROD=inositol polyphosphate phosphatase-like 1 /DB_XREF=gi:4755141 /UG=Hs.75339 inositol polyphosphate phosphatase-like 1 /FL=gb:NM_001567.2 gb:L24444.1
201599_at	1491.2	P	0.000244	gb:NM_000274.1 /DEF=Homo sapiens ornithine aminotransferase (gyrate atrophy) (OAT), nuclear gene encoding mitochondrial protein, mRNA. /FEA=mRNA /GEN=OAT /PROD=ornithine aminotransferase precursor /DB_XREF=gi:4557808 /UG=Hs.75485 ornithine aminotransferase (gyrate atrophy) /FL=gb:BC000964.1 gb:M12267.1 gb:M23204.1 gb:M14963.1 gb:NM_000274.1
201600_at	2720.0	P	0.000244	gb:NM_007273.1 /DEF=Homo sapiens B-cell associated protein (REA), mRNA. /FEA=mRNA /GEN=REA /PROD=B-cell associated protein /DB_XREF=gi:6005853 /UG=Hs.7771 B-cell associated protein /FL=gb:AF150962.1 gb:NM_007273.1 gb:AF126021.1 gb:AF178980.1
201601_x_at	3240.2	P	0.000244	gb:NM_003641.1 /DEF=Homo sapiens interferon induced transmembrane protein 1 (9-27) (IFITM1), mRNA. /FEA=mRNA /GEN=IFITM1 /PROD=interferon induced transmembrane protein 1(9-27) /DB_XREF=gi:4504580 /UG=Hs.146360 interferon induced transmembrane protein 1 (9-27) /FL=gb:BC000897.1 gb:J04164.1 gb:NM_003641.1
201602_s_at	272.4	P	0.000244	Consensus includes gb:BE737620 /FEA=EST /DB_XREF=gi:10151612 /DB_XREF=est:601572895F1 /CLONE=IMAGE:3839831 /UG=Hs.16533 myosin phosphatase, target subunit 1 /FL=gb:NM_002480.1
201603_at	1260.2	P	0.000244	Consensus includes gb:AI817061 /FEA=EST /DB_XREF=gi:5436140 /DB_XREF=est:wj76e05.x1 /CLONE=IMAGE:2408768 /UG=Hs.16533 myosin phosphatase, target subunit 1 /FL=gb:NM_002480.1
201604_s_at	343.5	P	0.000244	gb:NM_002480.1 /DEF=Homo sapiens myosin phosphatase, target subunit 1 (MYPT1), mRNA. /FEA=mRNA /GEN=MYPT1 /PROD=myosin phosphatase target subunit 1 /DB_XREF=gi:4505316 /UG=Hs.16533 myosin phosphatase, target subunit 1 /FL=gb:NM_002480.1
201605_x_at	87.5	P	0.037598	gb:NM_004368.1 /DEF=Homo sapiens calponin 2 (CNN2), mRNA. /FEA=mRNA /GEN=CNN2 /PROD=calponin 2 /DB_XREF=gi:4758017 /UG=Hs.169718 calponin 2 /FL=gb:D83735.1 gb:NM_004368.1
201606_s_at	1414.9	P	0.000244	Consensus includes gb:BE796924 /FEA=EST /DB_XREF=gi:10218031 /DB_XREF=est:601587284F1 /CLONE=IMAGE:3941445 /UG=Hs.172589 nuclear phosphoprotein similar to S. cerevisiae PWP1 /FL=gb:BC001652.1 gb:L07758.1 gb:NM_007062.1
201607_at	162.9	P	0.000244	Consensus includes gb:AI694451 /FEA=EST /DB_XREF=gi:4971791 /DB_XREF=est:wd83h06.x1 /CLONE=IMAGE:2338235 /UG=Hs.172589 nuclear phosphoprotein similar to S. cerevisiae PWP1 /FL=gb:BC001652.1 gb:L07758.1 gb:NM_007062.1
201608_s_at	818.4	P	0.000244	gb:NM_007062.1 /DEF=Homo sapiens nuclear phosphoprotein similar to S. cerevisiae PWP1 (PWP1), mRNA. /FEA=mRNA /GEN=PWP1 /PROD=nuclear phosphoprotein similar to S. cerevisiaePWP1 /DB_XREF=gi:5902033 /UG=Hs.172589 nuclear phosphoprotein similar to S. cerevisiae PWP1 /FL=gb:BC001652.1 gb:L07758.1 gb:NM_007062.1
201609_x_at	536.5	P	0.000244	Consensus includes gb:AL578502 /FEA=EST /DB_XREF=gi:12942638 /DB_XREF=est:AL578502 /CLONE=CS0DK011YK08 (3 prime) /UG=Hs.183212 isoprenylcysteine carboxyl methyltransferase /FL=gb:AF064084.1 gb:NM_012405.1 gb:AF173157.1
201610_at	2.8	A	0.753906	Consensus includes gb:AF064084.1 /DEF=Homo sapiens prenylcysteine carboxyl methyltransferase (PCCMT) mRNA, complete cds. /FEA=mRNA /GEN=PCCMT /PROD=prenylcysteine carboxyl methyltransferase /DB_XREF=gi:3135668 /UG=Hs.183212 isoprenylcysteine carboxyl methyltransferase /FL=gb:AF064084.1 gb:NM_012405.1 gb:AF173157.1
201611_s_at	318.8	P	0.000244	gb:NM_012405.1 /DEF=Homo sapiens isoprenylcysteine carboxyl methyltransferase (ICMT), mRNA. /FEA=mRNA /GEN=ICMT /PROD=isoprenylcysteine carboxyl methyltransferase /DB_XREF=gi:6912429 /UG=Hs.183212 isoprenylcysteine carboxyl methyltransferase /FL=gb:AF064084.1 gb:NM_012405.1 gb:AF173157.1
201612_at	836.6	P	0.000244	gb:NM_000696.1 /DEF=Homo sapiens aldehyde dehydrogenase 9 (gamma-aminobutyraldehyde dehydrogenase, E3 isozyme) (ALDH9), mRNA. /FEA=mRNA /GEN=ALDH9 /PROD=aldehyde dehydrogenase 9(gamma-aminobutyraldehyde dehydrogenase, E3 isozyme) /DB_XREF=gi:4502046 /UG=Hs.2533 aldehyde dehydrogenase 9 family, member A1 /FL=gb:U34252.1 gb:NM_000696.1 gb:AF172093.1
201613_s_at	510.6	P	0.002930	gb:BC000519.1 /DEF=Homo sapiens, RuvB (E coli homolog)-like 1, clone MGC:8557, mRNA, complete cds. /FEA=mRNA /PROD=RuvB (E coli homolog)-like 1 /DB_XREF=gi:12653494 /UG=Hs.272822 RuvB (E coli homolog)-like 1 /FL=gb:BC000519.1 gb:BC002993.1 gb:AB012122.1 gb:AF070735.1 gb:AF099084.1 gb:NM_003707.1
201614_s_at	434.5	P	0.000732	gb:NM_003707.1 /DEF=Homo sapiens RuvB (E coli homolog)-like 1 (RUVBL1), mRNA. /FEA=mRNA /GEN=RUVBL1 /PROD=TATA binding protein interacting protein 49 kDa /DB_XREF=gi:4506752 /UG=Hs.272822 RuvB (E coli homolog)-like 1 /FL=gb:BC000519.1 gb:BC002993.1 gb:AB012122.1 gb:AF070735.1 gb:AF099084.1 gb:NM_003707.1
201615_x_at	15.2	A	0.398926	Consensus includes gb:AI685060 /FEA=EST /DB_XREF=gi:4896365 /DB_XREF=est:wc67a07.x1 /CLONE=IMAGE:2323668 /UG=Hs.325474 caldesmon 1 /FL=gb:NM_004342.2 gb:M64110.1
201616_s_at	2.5	A	0.753906	Consensus includes gb:AL577531 /FEA=EST /DB_XREF=gi:12940753 /DB_XREF=est:AL577531 /CLONE=CS0DI087YP20 (3 prime) /UG=Hs.325474 caldesmon 1 /FL=gb:NM_004342.2 gb:M64110.1
201617_x_at	0.2	A	0.984863	gb:NM_004342.2 /DEF=Homo sapiens caldesmon 1 (CALD1), mRNA. /FEA=mRNA /GEN=CALD1 /PROD=caldesmon 1 /DB_XREF=gi:11091984 /UG=Hs.325474 caldesmon 1 /FL=gb:NM_004342.2 gb:M64110.1
201618_x_at	311.2	P	0.000244	gb:NM_003801.2 /DEF=Homo sapiens anchor attachment protein 1 (Gaa1p, yeast) homolog (GPAA1), mRNA. /FEA=mRNA /GEN=GPAA1 /PROD=anchor attachment protein 1 /DB_XREF=gi:6031166 /UG=Hs.4742 anchor attachment protein 1 (Gaa1p, yeast) homolog /FL=gb:BC003171.1 gb:BC004129.1 gb:AB006969.1 gb:AB002135.1 gb:NM_003801.2
201619_at	1770.5	P	0.000244	gb:NM_006793.1 /DEF=Homo sapiens peroxiredoxin 3 (PRDX3), nuclear gene encoding mitochondrial protein, mRNA. /FEA=mRNA /GEN=PRDX3 /PROD=peroxiredoxin 3 /DB_XREF=gi:5802973 /UG=Hs.75454 peroxiredoxin 3 /FL=gb:BC002685.1 gb:NM_006793.1 gb:D49396.1
201620_at	667.8	P	0.000244	gb:NM_003791.1 /DEF=Homo sapiens membrane-bound transcription factor protease, site 1 (MBTPS1), mRNA. /FEA=mRNA /GEN=MBTPS1 /PROD=site-1 protease preproprotein /DB_XREF=gi:4506774 /UG=Hs.75890 membrane-bound transcription factor protease, site 1 /FL=gb:NM_003791.1 gb:D42053.1
201621_at	37.8	A	0.303711	gb:NM_005380.1 /DEF=Homo sapiens neuroblastoma, suppression of tumorigenicity 1 (NBL1), mRNA. /FEA=mRNA /GEN=NBL1 /PROD=neuroblastoma, suppression of tumorigenicity 1 /DB_XREF=gi:4885508 /UG=Hs.76307 neuroblastoma, suppression of tumorigenicity 1 /FL=gb:NM_005380.1 gb:D28124.1
201622_at	432.5	P	0.002930	gb:NM_014390.1 /DEF=Homo sapiens EBNA-2 co-activator (100kD) (p100), mRNA. /FEA=mRNA /GEN=p100 /PROD=EBNA-2 co-activator (100kD) /DB_XREF=gi:7657430 /UG=Hs.79093 EBNA-2 co-activator (100kD) /FL=gb:NM_014390.1 gb:U22055.1
201623_s_at	2528.4	P	0.000244	gb:BC000629.1 /DEF=Homo sapiens, Similar to aspartyl-tRNA synthetase, clone MGC:1562, mRNA, complete cds. /FEA=mRNA /PROD=Similar to aspartyl-tRNA synthetase /DB_XREF=gi:12653688 /UG=Hs.80758 aspartyl-tRNA synthetase /FL=gb:BC000629.1 gb:J05032.1 gb:NM_001349.1
201624_at	643.7	P	0.000244	gb:NM_001349.1 /DEF=Homo sapiens aspartyl-tRNA synthetase (DARS), mRNA. /FEA=mRNA /GEN=DARS /PROD=aspartyl-tRNA synthetase /DB_XREF=gi:4557512 /UG=Hs.80758 aspartyl-tRNA synthetase /FL=gb:BC000629.1 gb:J05032.1 gb:NM_001349.1
201625_s_at	131.7	P	0.001953	Consensus includes gb:BE300521 /FEA=EST /DB_XREF=gi:9184269 /DB_XREF=est:ba69f11.x1 /CLONE=IMAGE:2905677 /UG=Hs.56205 insulin induced gene 1 /FL=gb:NM_005542.1
201626_at	432.0	P	0.000244	Consensus includes gb:BG292233 /FEA=EST /DB_XREF=gi:13050848 /DB_XREF=est:602386668F1 /CLONE=IMAGE:4515521 /UG=Hs.56205 insulin induced gene 1 /FL=gb:NM_005542.1
201627_s_at	231.0	P	0.000244	gb:NM_005542.1 /DEF=Homo sapiens insulin induced gene 1 (INSIG1), mRNA. /FEA=mRNA /GEN=INSIG1 /PROD=insulin induced gene 1 /DB_XREF=gi:5031800 /UG=Hs.56205 insulin induced gene 1 /FL=gb:NM_005542.1
201628_s_at	1248.2	P	0.000244	gb:NM_006570.1 /DEF=Homo sapiens Ras-related GTP-binding protein (RAGA), mRNA. /FEA=mRNA /GEN=RAGA /PROD=Ras-related GTP-binding protein /DB_XREF=gi:5729998 /UG=Hs.57304 Ras-related GTP-binding protein /FL=gb:U41654.1 gb:NM_006570.1
201629_s_at	994.5	P	0.000244	Consensus includes gb:BE872974 /FEA=EST /DB_XREF=gi:10321660 /DB_XREF=est:601450667F1 /CLONE=IMAGE:3854584 /UG=Hs.75393 acid phosphatase 1, soluble /FL=gb:M83653.1 gb:NM_004300.1
201630_s_at	1409.0	P	0.000244	gb:NM_004300.1 /DEF=Homo sapiens acid phosphatase 1, soluble (ACP1), transcript variant a, mRNA. /FEA=mRNA /GEN=ACP1 /PROD=acid phosphatase 1 isoform a /DB_XREF=gi:4757713 /UG=Hs.75393 acid phosphatase 1, soluble /FL=gb:M83653.1 gb:NM_004300.1
201631_s_at	6371.1	P	0.000244	gb:NM_003897.1 /DEF=Homo sapiens immediate early response 3 (IER3), mRNA. /FEA=mRNA /GEN=IER3 /PROD=immediate early response 3 /DB_XREF=gi:4503328 /UG=Hs.76095 immediate early response 3 /FL=gb:BC000844.1 gb:BC005080.1 gb:AF083421.1 gb:NM_003897.1
201632_at	829.2	P	0.001221	gb:NM_001414.1 /DEF=Homo sapiens eukaryotic translation initiation factor 2B, subunit 1 (alpha, 26kD) (EIF2B1), mRNA. /FEA=mRNA /GEN=EIF2B1 /PROD=eukaryotic translation initiation factor 2B,subunit 1 (alpha, 26kD) /DB_XREF=gi:4503502 /UG=Hs.78592 eukaryotic translation initiation factor 2B, subunit 1 (alpha, 26kD) /FL=gb:NM_001414.1
201633_s_at	477.7	P	0.000244	Consensus includes gb:AW235051 /FEA=EST /DB_XREF=gi:6567440 /DB_XREF=est:xn18a09.x1 /CLONE=IMAGE:2694040 /UG=Hs.79103 cytochrome b5 outer mitochondrial membrane precursor /FL=gb:BC004373.1 gb:NM_030579.1
201634_s_at	439.0	P	0.000732	gb:NM_030579.1 /DEF=Homo sapiens cytochrome b5 outer mitochondrial membrane precursor (CYB5-M), mRNA. /FEA=mRNA /GEN=CYB5-M /PROD=cytochrome b5 outer mitochondrial membraneprecursor /DB_XREF=gi:13385593 /UG=Hs.79103 cytochrome b5 outer mitochondrial membrane precursor /FL=gb:BC004373.1 gb:NM_030579.1
201635_s_at	648.2	P	0.000244	Consensus includes gb:AI990766 /FEA=EST /DB_XREF=gi:5837647 /DB_XREF=est:ws23e06.x1 /CLONE=IMAGE:2498050 /UG=Hs.82712 fragile X mental retardation, autosomal homolog 1 /FL=gb:NM_005087.1 gb:U25165.1
201636_at	814.4	P	0.000244	Consensus includes gb:BG025078 /FEA=EST /DB_XREF=gi:12411309 /DB_XREF=est:602276425F1 /CLONE=IMAGE:4364070 /UG=Hs.82712 fragile X mental retardation, autosomal homolog 1 /FL=gb:NM_005087.1 gb:U25165.1
201637_s_at	1203.3	P	0.000244	gb:NM_005087.1 /DEF=Homo sapiens fragile X mental retardation, autosomal homolog 1 (FXR1), mRNA. /FEA=mRNA /GEN=FXR1 /PROD=fragile X mental retardation-related protein 1 /DB_XREF=gi:4826735 /UG=Hs.82712 fragile X mental retardation, autosomal homolog 1 /FL=gb:NM_005087.1 gb:U25165.1
201638_s_at	12.1	A	0.274170	Consensus includes gb:BE676642 /FEA=EST /DB_XREF=gi:10037183 /DB_XREF=est:7f33f02.x1 /CLONE=IMAGE:3296475 /UG=Hs.83727 cleavage and polyadenylation specific factor 1, 160kD subunit /FL=gb:U37012.1 gb:AB046744.1 gb:NM_013291.1
201639_s_at	454.3	P	0.004150	gb:NM_013291.1 /DEF=Homo sapiens cleavage and polyadenylation specific factor 1, 160kD subunit (CPSF1), mRNA. /FEA=mRNA /GEN=CPSF1 /PROD=cleavage and polyadenylation specific factor 1,160kD subunit /DB_XREF=gi:9558724 /UG=Hs.83727 cleavage and polyadenylation specific factor 1, 160kD subunit /FL=gb:U37012.1 gb:AB046744.1 gb:NM_013291.1
201640_x_at	117.7	P	0.010742	gb:NM_001294.1 /DEF=Homo sapiens cleft lip and palate associated transmembrane protein 1 (CLPTM1), mRNA. /FEA=mRNA /GEN=CLPTM1 /PROD=cleft lip and palate associated transmembraneprotein 1 /DB_XREF=gi:4502896 /UG=Hs.106671 cleft lip and palate associated transmembrane protein 1 /FL=gb:AF037339.1 gb:NM_001294.1
201641_at	586.9	P	0.000244	gb:NM_004335.2 /DEF=Homo sapiens bone marrow stromal cell antigen 2 (BST2), mRNA. /FEA=mRNA /GEN=BST2 /PROD=bone marrow stromal cell antigen 2 /DB_XREF=gi:7262372 /UG=Hs.118110 bone marrow stromal cell antigen 2 /FL=gb:D28137.1 gb:NM_004335.2
201642_at	687.9	P	0.002930	gb:NM_005534.1 /DEF=Homo sapiens interferon gamma receptor 2 (interferon gamma transducer 1) (IFNGR2), mRNA. /FEA=mRNA /GEN=IFNGR2 /PROD=interferon gamma receptor 2 (interferon gammatransducer 1) /DB_XREF=gi:5031782 /UG=Hs.177559 interferon gamma receptor 2 (interferon gamma transducer 1) /FL=gb:BC003624.1 gb:U05875.1 gb:U05877.1 gb:NM_005534.1
201643_x_at	1087.7	P	0.000732	gb:NM_016604.1 /DEF=Homo sapiens putative zinc finger protein (LOC51780), mRNA. /FEA=mRNA /GEN=LOC51780 /PROD=putative zinc finger protein /DB_XREF=gi:7706598 /UG=Hs.24125 putative zinc finger protein /FL=gb:AF251039.1 gb:NM_016604.1
201644_at	901.5	P	0.002930	gb:NM_003313.2 /DEF=Homo sapiens tissue specific transplantation antigen P35B (TSTA3), mRNA. /FEA=mRNA /GEN=TSTA3 /PROD=tissue specific transplantation antigen P35B /DB_XREF=gi:6598326 /UG=Hs.264428 tissue specific transplantation antigen P35B /FL=gb:BC001941.1 gb:U58766.1 gb:NM_003313.2
201645_at	3.7	A	0.491211	gb:NM_002160.1 /DEF=Homo sapiens hexabrachion (tenascin C, cytotactin) (HXB), mRNA. /FEA=mRNA /GEN=HXB /PROD=hexabrachion (tenascin C, cytotactin) /DB_XREF=gi:4504548 /UG=Hs.289114 hexabrachion (tenascin C, cytotactin) /FL=gb:M55618.1 gb:NM_002160.1
201646_at	302.0	P	0.000244	Consensus includes gb:AA885297 /FEA=EST /DB_XREF=gi:2994374 /DB_XREF=est:al58h03.s1 /CLONE=IMAGE:1461557 /UG=Hs.323567 CD36 antigen (collagen type I receptor, thrombospondin receptor)-like 2 (lysosomal integral membrane protein II) /FL=gb:D12676.1 gb:NM_005506.1
201647_s_at	65.4	P	0.000732	gb:NM_005506.1 /DEF=Homo sapiens CD36 antigen (collagen type I receptor, thrombospondin receptor)-like 2 (lysosomal integral membrane protein II) (CD36L2), mRNA. /FEA=mRNA /GEN=CD36L2 /PROD=CD36 antigen (collagen type I receptor,thrombospondin receptor)-like 2 (lysosomal integralmembrane protein II) /DB_XREF=gi:5031630 /UG=Hs.323567 CD36 antigen (collagen type I receptor, thrombospondin receptor)…
201648_at	2447.6	P	0.000244	Consensus includes gb:AL039831 /FEA=EST /DB_XREF=gi:5935215 /DB_XREF=est:DKFZp434D1112_s1 /CLONE=DKFZp434D1112 /UG=Hs.50651 Janus kinase 1 (a protein tyrosine kinase) /FL=gb:M64174.1 gb:NM_002227.1
201649_at	1072.8	P	0.000244	gb:NM_004223.1 /DEF=Homo sapiens ubiquitin-conjugating enzyme E2L 6 (UBE2L6), mRNA. /FEA=mRNA /GEN=UBE2L6 /PROD=ubiquitin-conjugating enzyme E2L 6 /DB_XREF=gi:4759281 /UG=Hs.169895 ubiquitin-conjugating enzyme E2L 6 /FL=gb:AF031141.1 gb:AF061736.1 gb:NM_004223.1
201650_at	8662.5	P	0.000244	gb:NM_002276.1 /DEF=Homo sapiens keratin 19 (KRT19), mRNA. /FEA=mRNA /GEN=KRT19 /PROD=keratin 19 /DB_XREF=gi:4504916 /UG=Hs.182265 keratin 19 /FL=gb:BC002539.1 gb:NM_002276.1
201651_s_at	693.0	P	0.000732	gb:NM_007229.1 /DEF=Homo sapiens protein kinase C and casein kinase substrate in neurons 2 (PACSIN2), mRNA. /FEA=mRNA /GEN=PACSIN2 /PROD=protein kinase C and casein kinase substrate inneurons 2 /DB_XREF=gi:6005825 /UG=Hs.18842 protein kinase C and casein kinase substrate in neurons 2 /FL=gb:AF128536.1 gb:NM_007229.1
201652_at	1520.9	P	0.000244	gb:NM_006837.1 /DEF=Homo sapiens COP9 (constitutive photomorphogenic, Arabidopsis, homolog) subunit 5 (COPS5), mRNA. /FEA=mRNA /GEN=COPS5 /PROD=COP9 (constitutive photomorphogenic,Arabidopsis, homolog) subunit 5 /DB_XREF=gi:5803045 /UG=Hs.198767 COP9 (constitutive photomorphogenic, Arabidopsis, homolog) subunit 5 /FL=gb:BC001187.1 gb:BC001859.1 gb:U65928.1 gb:U70734.1 gb:NM_006837.1
201653_at	2588.5	P	0.000244	gb:NM_005776.1 /DEF=Homo sapiens cornichon-like (CNIL), mRNA. /FEA=mRNA /GEN=CNIL /PROD=cornichon-like /DB_XREF=gi:5031638 /UG=Hs.201673 cornichon-like /FL=gb:AF104398.1 gb:AF070654.1 gb:AF031379.1 gb:NM_005776.1
201654_s_at	3.8	A	0.696289	Consensus includes gb:AI991033 /FEA=EST /DB_XREF=gi:5837930 /DB_XREF=est:wu36a08.x1 /CLONE=IMAGE:2522102 /UG=Hs.211573 heparan sulfate proteoglycan 2 (perlecan) /FL=gb:M85289.1 gb:NM_005529.2
201655_s_at	101.7	P	0.018555	gb:M85289.1 /DEF=Human heparan sulfate proteoglycan (HSPG2) mRNA, complete cds. /FEA=mRNA /GEN=HSPG2 /PROD=heparan sulfate proteoglycan /DB_XREF=gi:184426 /UG=Hs.211573 heparan sulfate proteoglycan 2 (perlecan) /FL=gb:M85289.1 gb:NM_005529.2
201656_at	26.9	P	0.046143	gb:NM_000210.1 /DEF=Homo sapiens integrin, alpha 6 (ITGA6), mRNA. /FEA=mRNA /GEN=ITGA6 /PROD=integrin alpha chain, alpha 6 /DB_XREF=gi:4557674 /UG=Hs.227730 integrin, alpha 6 /FL=gb:NM_000210.1
201657_at	249.0	P	0.000244	Consensus includes gb:BE890745 /FEA=EST /DB_XREF=gi:10349375 /DB_XREF=est:601431177F1 /CLONE=IMAGE:3916507 /UG=Hs.242894 ADP-ribosylation factor-like 1 /FL=gb:NM_001177.2 gb:L28997.1
201658_at	471.4	P	0.000244	Consensus includes gb:AU151560 /FEA=EST /DB_XREF=gi:11013081 /DB_XREF=est:AU151560 /CLONE=NT2RP2005555 /UG=Hs.242894 ADP-ribosylation factor-like 1 /FL=gb:NM_001177.2 gb:L28997.1
201659_s_at	860.4	P	0.000244	gb:NM_001177.2 /DEF=Homo sapiens ADP-ribosylation factor-like 1 (ARL1), mRNA. /FEA=mRNA /GEN=ARL1 /PROD=ADP-ribosylation factor-like 1 /DB_XREF=gi:4755126 /UG=Hs.242894 ADP-ribosylation factor-like 1 /FL=gb:NM_001177.2 gb:L28997.1
201660_at	352.7	P	0.000244	Consensus includes gb:AL525798 /FEA=EST /DB_XREF=gi:12789291 /DB_XREF=est:AL525798 /CLONE=CS0DC013YB08 (5 prime) /UG=Hs.268012 fatty-acid-Coenzyme A ligase, long-chain 3 /FL=gb:NM_004457.2 gb:D89053.1 gb:AF116690.1
201661_s_at	1310.9	P	0.000244	gb:NM_004457.2 /DEF=Homo sapiens fatty-acid-Coenzyme A ligase, long-chain 3 (FACL3), mRNA. /FEA=mRNA /GEN=FACL3 /PROD=long-chain fatty-acid-Coenzyme A ligase 3 /DB_XREF=gi:12669907 /UG=Hs.268012 fatty-acid-Coenzyme A ligase, long-chain 3 /FL=gb:NM_004457.2 gb:D89053.1 gb:AF116690.1
201662_s_at	1749.6	P	0.000244	gb:D89053.1 /DEF=Homo sapiens mRNA for Acyl-CoA synthetase 3, complete cds. /FEA=mRNA /PROD=Acyl-CoA synthetase 3 /DB_XREF=gi:4165017 /UG=Hs.268012 fatty-acid-Coenzyme A ligase, long-chain 3 /FL=gb:NM_004457.2 gb:D89053.1 gb:AF116690.1
201663_s_at	339.5	P	0.000244	gb:NM_005496.1 /DEF=Homo sapiens chromosome-associated polypeptide C (CAP-C), mRNA. /FEA=mRNA /GEN=CAP-C /PROD=chromosome-associated polypeptide C /DB_XREF=gi:4885112 /UG=Hs.50758 SMC4 (structural maintenance of chromosomes 4, yeast)-like 1 /FL=gb:AB019987.1 gb:NM_005496.1 gb:AL136877.1
201664_at	976.5	P	0.000244	gb:AL136877.1 /DEF=Homo sapiens mRNA; cDNA DKFZp434F205 (from clone DKFZp434F205); complete cds. /FEA=mRNA /GEN=DKFZp434F205 /PROD=hypothetical protein /DB_XREF=gi:6807670 /UG=Hs.50758 SMC4 (structural maintenance of chromosomes 4, yeast)-like 1 /FL=gb:AB019987.1 gb:NM_005496.1 gb:AL136877.1
201665_x_at	11301.0	P	0.000244	gb:NM_001021.1 /DEF=Homo sapiens ribosomal protein S17 (RPS17), mRNA. /FEA=mRNA /GEN=RPS17 /PROD=ribosomal protein S17 /DB_XREF=gi:4506692 /UG=Hs.5174 ribosomal protein S17 /FL=gb:M13932.1 gb:NM_001021.1
201666_at	1309.0	P	0.000244	gb:NM_003254.1 /DEF=Homo sapiens tissue inhibitor of metalloproteinase 1 (erythroid potentiating activity, collagenase inhibitor) (TIMP1), mRNA. /FEA=mRNA /GEN=TIMP1 /PROD=tissue inhibitor of metalloproteinase 1precursor /DB_XREF=gi:4507508 /UG=Hs.5831 tissue inhibitor of metalloproteinase 1 (erythroid potentiating activity, collagenase inhibitor) /FL=gb:BC000866.1 gb:M12670.1 gb:M59906.1 gb:NM_0…
201667_at	15.2	A	0.194580	gb:NM_000165.2 /DEF=Homo sapiens gap junction protein, alpha 1, 43kD (connexin 43) (GJA1), mRNA. /FEA=mRNA /GEN=GJA1 /PROD=connexin 43 /DB_XREF=gi:4755136 /UG=Hs.74471 gap junction protein, alpha 1, 43kD (connexin 43) /FL=gb:M65188.1 gb:NM_000165.2
201668_x_at	55.8	P	0.002930	Consensus includes gb:AW163148 /FEA=EST /DB_XREF=gi:6302181 /DB_XREF=est:au92d06.y1 /CLONE=IMAGE:2783723 /UG=Hs.75607 myristoylated alanine-rich protein kinase C substrate (MARCKS, 80K-L) /FL=gb:NM_002356.4 gb:M68956.1 gb:D10522.1
201669_s_at	2036.2	P	0.000244	gb:NM_002356.4 /DEF=Homo sapiens myristoylated alanine-rich protein kinase C substrate (MARCKS, 80K-L) (MACS), mRNA. /FEA=mRNA /GEN=MACS /PROD=myristoylated alanine-rich protein kinase Csubstrate /DB_XREF=gi:11125771 /UG=Hs.75607 myristoylated alanine-rich protein kinase C substrate (MARCKS, 80K-L) /FL=gb:NM_002356.4 gb:M68956.1 gb:D10522.1
201670_s_at	661.2	P	0.000244	gb:M68956.1 /DEF=Human myristoylated alanine-rich C-kinase substrate mRNA, complete cds. /FEA=mRNA /GEN=MACS /PROD=myristoylated alanine-rich C-kinase substrate /DB_XREF=gi:187386 /UG=Hs.75607 myristoylated alanine-rich protein kinase C substrate (MARCKS, 80K-L) /FL=gb:NM_002356.4 gb:M68956.1 gb:D10522.1
201671_x_at	285.8	P	0.000244	gb:BC003556.1 /DEF=Homo sapiens, ubiquitin specific protease 14 (tRNA-guanine transglycosylase), clone MGC:1453, mRNA, complete cds. /FEA=mRNA /PROD=ubiquitin specific protease 14 (tRNA-guaninetransglycosylase) /DB_XREF=gi:13097695 /UG=Hs.75981 ubiquitin specific protease 14 (tRNA-guanine transglycosylase) /FL=gb:BC003556.1 gb:NM_005151.1 gb:U30888.1
201672_s_at	1081.7	P	0.000244	gb:NM_005151.1 /DEF=Homo sapiens ubiquitin specific protease 14 (tRNA-guanine transglycosylase) (USP14), mRNA. /FEA=mRNA /GEN=USP14 /PROD=ubiquitin specific protease 14 (tRNA-guaninetransglycosylase) /DB_XREF=gi:4827049 /UG=Hs.75981 ubiquitin specific protease 14 (tRNA-guanine transglycosylase) /FL=gb:BC003556.1 gb:NM_005151.1 gb:U30888.1
201673_s_at	214.2	P	0.000244	gb:NM_002103.1 /DEF=Homo sapiens glycogen synthase 1 (muscle) (GYS1), mRNA. /FEA=mRNA /GEN=GYS1 /PROD=glycogen synthase 1 (muscle) /DB_XREF=gi:4504232 /UG=Hs.772 glycogen synthase 1 (muscle) /FL=gb:U32573.1 gb:BC002617.1 gb:J04501.1 gb:NM_002103.1
201674_s_at	865.0	P	0.000244	gb:BC000729.1 /DEF=Homo sapiens, A kinase (PRKA) anchor protein 1, clone MGC:1807, mRNA, complete cds. /FEA=mRNA /PROD=A kinase (PRKA) anchor protein 1 /DB_XREF=gi:12653874 /UG=Hs.78921 A kinase (PRKA) anchor protein 1 /FL=gb:BC000729.1 gb:NM_003488.1
201675_at	1203.2	P	0.000244	gb:NM_003488.1 /DEF=Homo sapiens A kinase (PRKA) anchor protein 1 (AKAP1), mRNA. /FEA=mRNA /GEN=AKAP1 /PROD=A kinase (PRKA) anchor protein 1 /DB_XREF=gi:4502014 /UG=Hs.78921 A kinase (PRKA) anchor protein 1 /FL=gb:BC000729.1 gb:NM_003488.1
201676_x_at	2676.9	P	0.000244	gb:NM_002786.1 /DEF=Homo sapiens proteasome (prosome, macropain) subunit, alpha type, 1 (PSMA1), mRNA. /FEA=mRNA /GEN=PSMA1 /PROD=proteasome (prosome, macropain) subunit, alphatype, 1 /DB_XREF=gi:4506178 /UG=Hs.82159 proteasome (prosome, macropain) subunit, alpha type, 1 /FL=gb:BC002577.1 gb:NM_002786.1
201677_at	98.8	P	0.001221	Consensus includes gb:AI937543 /FEA=EST /DB_XREF=gi:5676413 /DB_XREF=est:wp78f01.x1 /CLONE=IMAGE:2467897 /UG=Hs.110480 DC12 protein /FL=gb:AF201934.1 gb:NM_020187.1
201678_s_at	683.3	P	0.001221	gb:NM_020187.1 /DEF=Homo sapiens DC12 protein (DC12), mRNA. /FEA=mRNA /GEN=DC12 /PROD=DC12 protein /DB_XREF=gi:9910181 /UG=Hs.110480 DC12 protein /FL=gb:AF201934.1 gb:NM_020187.1
201679_at	14.5	A	0.334473	Consensus includes gb:BE646076 /FEA=EST /DB_XREF=gi:9970376 /DB_XREF=est:7e92g12.x1 /CLONE=IMAGE:3292678 /UG=Hs.111801 arsenate resistance protein ARS2 /FL=gb:BC000082.1 gb:AF082871.1 gb:NM_015908.1
201680_x_at	895.9	P	0.000244	gb:NM_015908.1 /DEF=Homo sapiens arsenate resistance protein ARS2 (ARS2), mRNA. /FEA=mRNA /GEN=ARS2 /PROD=arsenate resistance protein ARS2 /DB_XREF=gi:7706237 /UG=Hs.111801 arsenate resistance protein ARS2 /FL=gb:BC000082.1 gb:AF082871.1 gb:NM_015908.1
201681_s_at	1501.9	P	0.000732	Consensus includes gb:AB011155.1 /DEF=Homo sapiens mRNA for KIAA0583 protein, partial cds. /FEA=mRNA /GEN=KIAA0583 /PROD=KIAA0583 protein /DB_XREF=gi:3043689 /UG=Hs.170290 discs, large (Drosophila) homolog 5 /FL=gb:U61843.1 gb:NM_004747.1
201682_at	2500.5	P	0.000244	gb:NM_004279.1 /DEF=Homo sapiens peptidase (mitochondrial processing) beta (PMPCB), mRNA. /FEA=mRNA /GEN=PMPCB /PROD=peptidase (mitochondrial processing) beta /DB_XREF=gi:4758733 /UG=Hs.184211 peptidase (mitochondrial processing) beta /FL=gb:AF054182.1 gb:NM_004279.1
201683_x_at	395.5	P	0.000244	Consensus includes gb:BE783632 /FEA=EST /DB_XREF=gi:10204830 /DB_XREF=est:601471206F1 /CLONE=IMAGE:3874321 /UG=Hs.194035 KIAA0737 gene product /FL=gb:AB018280.1 gb:NM_014828.1
201684_s_at	495.3	P	0.000244	Consensus includes gb:BF001668 /FEA=EST /DB_XREF=gi:10701943 /DB_XREF=est:7g91e03.x1 /CLONE=IMAGE:3313852 /UG=Hs.194035 KIAA0737 gene product /FL=gb:AB018280.1 gb:NM_014828.1
201685_s_at	314.5	P	0.000244	gb:NM_014828.1 /DEF=Homo sapiens KIAA0737 gene product (KIAA0737), mRNA. /FEA=mRNA /GEN=KIAA0737 /PROD=KIAA0737 gene product /DB_XREF=gi:7662273 /UG=Hs.194035 KIAA0737 gene product /FL=gb:AB018280.1 gb:NM_014828.1
201686_x_at	87.9	P	0.000732	gb:AF229254.1 /DEF=Homo sapiens clone FIF 504 fibroblast growth factor 2-interacting factor (API5) mRNA, complete cds. /FEA=mRNA /GEN=API5 /PROD=fibroblast growth factor 2-interacting factor /DB_XREF=gi:12656084 /UG=Hs.227913 API5-like 1 /FL=gb:AF229254.1 gb:NM_006595.1
201687_s_at	618.7	P	0.000244	gb:NM_006595.1 /DEF=Homo sapiens API5-like 1 (API5L1), mRNA. /FEA=mRNA /GEN=API5L1 /PROD=API5-like 1 /DB_XREF=gi:5729729 /UG=Hs.227913 API5-like 1 /FL=gb:AF229254.1 gb:NM_006595.1
201688_s_at	658.6	P	0.000244	Consensus includes gb:BG389015 /FEA=EST /DB_XREF=gi:13282461 /DB_XREF=est:602414790F1 /CLONE=IMAGE:4523087 /UG=Hs.2384 tumor protein D52 /FL=gb:NM_005079.1 gb:U18914.1
201689_s_at	826.9	P	0.000244	Consensus includes gb:BE974098 /FEA=EST /DB_XREF=gi:10587434 /DB_XREF=est:601680437F1 /CLONE=IMAGE:3950697 /UG=Hs.2384 tumor protein D52 /FL=gb:NM_005079.1 gb:U18914.1
201690_s_at	2029.3	P	0.000244	Consensus includes gb:AA524023 /FEA=EST /DB_XREF=gi:2264951 /DB_XREF=est:ng32e06.s1 /CLONE=IMAGE:936514 /UG=Hs.2384 tumor protein D52 /FL=gb:NM_005079.1 gb:U18914.1
201691_s_at	45.9	P	0.001221	gb:NM_005079.1 /DEF=Homo sapiens tumor protein D52 (TPD52), mRNA. /FEA=mRNA /GEN=TPD52 /PROD=tumor protein D52 /DB_XREF=gi:4827037 /UG=Hs.2384 tumor protein D52 /FL=gb:NM_005079.1 gb:U18914.1
201692_at	73.6	P	0.014160	gb:NM_005866.1 /DEF=Homo sapiens sigma receptor (SR31747 binding protein 1) (SR-BP1), mRNA. /FEA=mRNA /GEN=SR-BP1 /PROD=sigma receptor (SR31747 binding protein 1) /DB_XREF=gi:5032116 /UG=Hs.24447 sigma receptor (SR31747 binding protein 1) /FL=gb:BC004899.1 gb:U75283.1 gb:U79528.1 gb:NM_005866.1
201693_s_at	329.5	P	0.000244	Consensus includes gb:AV733950 /FEA=EST /DB_XREF=gi:10851495 /DB_XREF=est:AV733950 /CLONE=cdAADG12 /UG=Hs.326035 early growth response 1 /FL=gb:M62829.1 gb:NM_001964.1
201694_s_at	2614.7	P	0.000244	gb:NM_001964.1 /DEF=Homo sapiens early growth response 1 (EGR1), mRNA. /FEA=mRNA /GEN=EGR1 /PROD=early growth response 1 /DB_XREF=gi:4503492 /UG=Hs.326035 early growth response 1 /FL=gb:M62829.1 gb:NM_001964.1
201695_s_at	680.8	P	0.000244	gb:NM_000270.1 /DEF=Homo sapiens nucleoside phosphorylase (NP), mRNA. /FEA=mRNA /GEN=NP /PROD=purine nucleoside phosphorylase /DB_XREF=gi:4557800 /UG=Hs.75514 nucleoside phosphorylase /FL=gb:NM_000270.1
201696_at	573.3	P	0.000244	gb:NM_005626.1 /DEF=Homo sapiens splicing factor, arginineserine-rich 4 (SFRS4), mRNA. /FEA=mRNA /GEN=SFRS4 /PROD=splicing factor, arginineserine-rich 4 /DB_XREF=gi:5032088 /UG=Hs.76122 splicing factor, arginineserine-rich 4 /FL=gb:BC002781.1 gb:L14076.1 gb:NM_005626.1
201697_s_at	632.6	P	0.001953	gb:NM_001379.1 /DEF=Homo sapiens DNA (cytosine-5-)-methyltransferase 1 (DNMT1), mRNA. /FEA=mRNA /GEN=DNMT1 /PROD=DNA (cytosine-5-)-methyltransferase 1 /DB_XREF=gi:4503350 /UG=Hs.77462 DNA (cytosine-5-)-methyltransferase 1 /FL=gb:NM_001379.1
201698_s_at	4376.9	P	0.000244	gb:NM_003769.1 /DEF=Homo sapiens splicing factor, arginineserine-rich 9 (SFRS9), mRNA. /FEA=mRNA /GEN=SFRS9 /PROD=splicing factor, arginineserine-rich 9 /DB_XREF=gi:4506902 /UG=Hs.77608 splicing factor, arginineserine-rich 9 /FL=gb:U30825.1 gb:NM_003769.1
201699_at	2955.4	P	0.000244	gb:NM_002806.1 /DEF=Homo sapiens proteasome (prosome, macropain) 26S subunit, ATPase, 6 (PSMC6), mRNA. /FEA=mRNA /GEN=PSMC6 /PROD=proteasome (prosome, macropain) 26S subunit,ATPase, 6 /DB_XREF=gi:4506214 /UG=Hs.79357 proteasome (prosome, macropain) 26S subunit, ATPase, 6 /FL=gb:BC005390.1 gb:D78275.1 gb:AF006305.1 gb:NM_002806.1
201700_at	367.9	P	0.000244	gb:NM_001760.1 /DEF=Homo sapiens cyclin D3 (CCND3), mRNA. /FEA=mRNA /GEN=CCND3 /PROD=cyclin D3 /DB_XREF=gi:4502618 /UG=Hs.83173 cyclin D3 /FL=gb:M90814.1 gb:M92287.1 gb:NM_001760.1
201701_s_at	403.4	P	0.000244	gb:NM_006320.1 /DEF=Homo sapiens progesterone membrane binding protein (PMBP), mRNA. /FEA=mRNA /GEN=PMBP /PROD=progesterone membrane binding protein /DB_XREF=gi:5453915 /UG=Hs.9071 progesterone membrane binding protein /FL=gb:NM_006320.1
201702_s_at	45.0	A	0.246094	Consensus includes gb:AI492873 /FEA=EST /DB_XREF=gi:4393876 /DB_XREF=est:th78b05.x1 /CLONE=IMAGE:2124753 /UG=Hs.106019 protein phosphatase 1, regulatory subunit 10 /FL=gb:NM_002714.1
201703_s_at	139.1	P	0.001221	gb:NM_002714.1 /DEF=Homo sapiens protein phosphatase 1, regulatory subunit 10 (PPP1R10), mRNA. /FEA=mRNA /GEN=PPP1R10 /PROD=protein phosphatase 1, regulatory subunit 10 /DB_XREF=gi:4506008 /UG=Hs.106019 protein phosphatase 1, regulatory subunit 10 /FL=gb:NM_002714.1
201704_at	239.0	P	0.010742	gb:NM_001247.1 /DEF=Homo sapiens ectonucleoside triphosphate diphosphohydrolase 6 (putative function) (ENTPD6), mRNA. /FEA=mRNA /GEN=ENTPD6 /PROD=ectonucleoside triphosphate diphosphohydrolase 6(putative function) /DB_XREF=gi:4557422 /UG=Hs.12330 ectonucleoside triphosphate diphosphohydrolase 6 (putative function) /FL=gb:AF039916.1 gb:NM_001247.1
201705_at	1998.7	P	0.000244	gb:NM_002811.1 /DEF=Homo sapiens proteasome (prosome, macropain) 26S subunit, non-ATPase, 7 (Mov34 homolog) (PSMD7), mRNA. /FEA=mRNA /GEN=PSMD7 /PROD=proteasome (prosome, macropain) 26S subunit,non-ATPase, 7 (Mov34 homolog) /DB_XREF=gi:4506230 /UG=Hs.155543 proteasome (prosome, macropain) 26S subunit, non-ATPase, 7 (Mov34 homolog) /FL=gb:NM_002811.1 gb:D50063.1
201706_s_at	78.5	P	0.018555	gb:BC000496.1 /DEF=Homo sapiens, peroxisomal farnesylated protein, clone MGC:8403, mRNA, complete cds. /FEA=mRNA /PROD=peroxisomal farnesylated protein /DB_XREF=gi:12653448 /UG=Hs.168670 peroxisomal farnesylated protein /FL=gb:BC000496.1 gb:NM_002857.1 gb:AB018541.1
201707_at	136.2	P	0.001953	gb:NM_002857.1 /DEF=Homo sapiens peroxisomal farnesylated protein (PXF), mRNA. /FEA=mRNA /GEN=PXF /PROD=peroxisomal farnesylated protein /DB_XREF=gi:4506338 /UG=Hs.168670 peroxisomal farnesylated protein /FL=gb:BC000496.1 gb:NM_002857.1 gb:AB018541.1
201708_s_at	1036.6	P	0.000244	Consensus includes gb:AW083371 /FEA=EST /DB_XREF=gi:6038609 /DB_XREF=est:xc09g02.x1 /CLONE=IMAGE:2583794 /UG=Hs.173878 NIPSNAP, C. elegans, homolog 1 /FL=gb:BC002371.1 gb:NM_003634.1
201709_s_at	975.7	P	0.001221	gb:NM_003634.1 /DEF=Homo sapiens NIPSNAP, C. elegans, homolog 1 (NIPSNAP1), mRNA. /FEA=mRNA /GEN=NIPSNAP1 /PROD=NIPSNAP, C. elegans, homolog 1 /DB_XREF=gi:4505398 /UG=Hs.173878 NIPSNAP, C. elegans, homolog 1 /FL=gb:BC002371.1 gb:NM_003634.1
201710_at	206.8	P	0.008057	gb:NM_002466.1 /DEF=Homo sapiens v-myb avian myeloblastosis viral oncogene homolog-like 2 (MYBL2), mRNA. /FEA=mRNA /GEN=MYBL2 /PROD=v-myb avian myeloblastosis viral oncogenehomolog-like 2 /DB_XREF=gi:4505292 /UG=Hs.179718 v-myb avian myeloblastosis viral oncogene homolog-like 2 /FL=gb:NM_002466.1
201711_x_at	256.4	P	0.000244	Consensus includes gb:AI681120 /FEA=EST /DB_XREF=gi:4891302 /DB_XREF=est:tx44b06.x1 /CLONE=IMAGE:2272403 /UG=Hs.199179 RAN binding protein 2 /FL=gb:NM_006267.2 gb:D42063.1
201712_s_at	142.0	P	0.000244	gb:NM_006267.2 /DEF=Homo sapiens RAN binding protein 2 (RANBP2), mRNA. /FEA=mRNA /GEN=RANBP2 /PROD=RAN binding protein 2 /DB_XREF=gi:6382078 /UG=Hs.199179 RAN binding protein 2 /FL=gb:NM_006267.2 gb:D42063.1
201713_s_at	838.3	P	0.000244	gb:D42063.1 /DEF=Human mRNA for RanBP2 (Ran-binding protein 2), complete cds. /FEA=mRNA /PROD=RanBP2 (Ran-binding protein 2) /DB_XREF=gi:924266 /UG=Hs.199179 RAN binding protein 2 /FL=gb:NM_006267.2 gb:D42063.1
201714_at	647.4	P	0.000244	gb:NM_001070.1 /DEF=Homo sapiens tubulin, gamma 1 (TUBG1), mRNA. /FEA=mRNA /GEN=TUBG1 /PROD=tubulin, gamma 1 /DB_XREF=gi:4507730 /UG=Hs.21635 tubulin, gamma 1 /FL=gb:BC000619.1 gb:M61764.1 gb:NM_001070.1
201715_s_at	251.7	P	0.000732	gb:NM_014977.1 /DEF=Homo sapiens KIAA0670 proteinacinus (KIAA0670), mRNA. /FEA=mRNA /GEN=KIAA0670 /PROD=KIAA0670 proteinacinus /DB_XREF=gi:7662237 /UG=Hs.227133 KIAA0670 proteinacinus /FL=gb:AF124726.1 gb:NM_014977.1
201716_at	644.1	P	0.000244	gb:NM_003099.1 /DEF=Homo sapiens sorting nexin 1 (SNX1), mRNA. /FEA=mRNA /GEN=SNX1 /PROD=sorting nexin 1 /DB_XREF=gi:4507138 /UG=Hs.75283 sorting nexin 1 /FL=gb:BC000357.1 gb:U53225.1 gb:AF065483.1 gb:NM_003099.1
201717_at	912.8	P	0.000244	gb:NM_004927.1 /DEF=Homo sapiens chromosome 11 open reading frame 4 (C11ORF4), mRNA. /FEA=mRNA /GEN=C11ORF4 /PROD=chromosome 11 open reading frame 4 /DB_XREF=gi:4826648 /UG=Hs.75859 chromosome 11 open reading frame 4 /FL=gb:U39400.1 gb:BC004378.1 gb:NM_004927.1
201718_s_at	74.3	P	0.008057	Consensus includes gb:BF511685 /FEA=EST /DB_XREF=gi:11594983 /DB_XREF=est:UI-H-BI4-aom-c-09-0-UI.s1 /CLONE=IMAGE:3085432 /UG=Hs.7857 erythrocyte membrane protein band 4.1-like 2 /FL=gb:AF027299.1 gb:NM_001431.1
201719_s_at	193.0	P	0.001221	gb:NM_001431.1 /DEF=Homo sapiens erythrocyte membrane protein band 4.1-like 2 (EPB41L2), mRNA. /FEA=mRNA /GEN=EPB41L2 /PROD=erythrocyte membrane protein band 4.1-like 2 /DB_XREF=gi:4503578 /UG=Hs.7857 erythrocyte membrane protein band 4.1-like 2 /FL=gb:AF027299.1 gb:NM_001431.1
201720_s_at	5.1	A	0.633789	Consensus includes gb:AI589086 /FEA=EST /DB_XREF=gi:4598134 /DB_XREF=est:tf80g10.x1 /CLONE=IMAGE:2105634 /UG=Hs.79356 Lysosomal-associated multispanning membrane protein-5 /FL=gb:U51240.1 gb:NM_006762.1 gb:U30498.1
201721_s_at	29.6	P	0.023926	gb:NM_006762.1 /DEF=Homo sapiens Lysosomal-associated multispanning membrane protein-5 (LAPTM5), mRNA. /FEA=mRNA /GEN=LAPTM5 /PROD=Lysosomal-associated multispanning membraneprotein-5 /DB_XREF=gi:5803055 /UG=Hs.79356 Lysosomal-associated multispanning membrane protein-5 /FL=gb:U51240.1 gb:NM_006762.1 gb:U30498.1
201722_s_at	606.0	P	0.000244	Consensus includes gb:AV692127 /FEA=EST /DB_XREF=gi:10293990 /DB_XREF=est:AV692127 /CLONE=GKCAOB04 /UG=Hs.80120 UDP-N-acetyl-alpha-D-galactosamine:polypeptide N-acetylgalactosaminyltransferase 1 (GalNAc-T1) /FL=gb:U41514.1 gb:NM_020474.2
201723_s_at	869.1	P	0.000244	gb:U41514.1 /DEF=Human UDP-GalNAc:polypeptide N-acetylgalactosaminyltransferase mRNA, complete cds. /FEA=mRNA /PROD=UDP-GalNAc:polypeptideN-acetylgalactosaminyltransferase /DB_XREF=gi:1136284 /UG=Hs.80120 UDP-N-acetyl-alpha-D-galactosamine:polypeptide N-acetylgalactosaminyltransferase 1 (GalNAc-T1) /FL=gb:U41514.1 gb:NM_020474.2
201724_s_at	382.5	P	0.000244	gb:NM_020474.2 /DEF=Homo sapiens UDP-N-acetyl-alpha-D-galactosamine:polypeptide N-acetylgalactosaminyltransferase 1 (GalNAc-T1) (GALNT1), mRNA. /FEA=mRNA /GEN=GALNT1 /PROD=polypeptide N-acetylgalactosaminyltransferase 1 /DB_XREF=gi:13124890 /UG=Hs.80120 UDP-N-acetyl-alpha-D-galactosamine:polypeptide N-acetylgalactosaminyltransferase 1 (GalNAc-T1) /FL=gb:U41514.1 gb:NM_020474.2
201725_at	792.1	P	0.000244	gb:NM_006023.1 /DEF=Homo sapiens D123 gene product (D123), mRNA. /FEA=mRNA /GEN=D123 /PROD=D123 gene product /DB_XREF=gi:5174422 /UG=Hs.82043 D123 gene product /FL=gb:BC001600.1 gb:D14878.1 gb:U27112.1 gb:NM_006023.1
201726_at	2056.1	P	0.000244	gb:BC003376.1 /DEF=Homo sapiens, ELAV (embryonic lethal, abnormal vision, Drosophila)-like 1 (Hu antigen R), clone MGC:5084, mRNA, complete cds. /FEA=mRNA /PROD=ELAV (embryonic lethal, abnormal vision,Drosophila)-like 1 (Hu antigen R) /DB_XREF=gi:13097227 /UG=Hs.12379 ELAV (embryonic lethal, abnormal vision, Drosophila)-like 1 (Hu antigen R) /FL=gb:U38175.1 gb:BC003376.1 gb:NM_001419.1
201727_s_at	160.9	P	0.000244	gb:NM_001419.1 /DEF=Homo sapiens ELAV (embryonic lethal, abnormal vision, Drosophila)-like 1 (Hu antigen R) (ELAVL1), mRNA. /FEA=mRNA /GEN=ELAVL1 /PROD=ELAV (embryonic lethal, abnormal vision,Drosophila)-like 1 (Hu antigen R) /DB_XREF=gi:4503550 /UG=Hs.12379 ELAV (embryonic lethal, abnormal vision, Drosophila)-like 1 (Hu antigen R) /FL=gb:U38175.1 gb:BC003376.1 gb:NM_001419.1
201728_s_at	60.8	P	0.018555	Consensus includes gb:AA904674 /FEA=EST /DB_XREF=gi:3039797 /DB_XREF=est:oj73f02.s1 /CLONE=IMAGE:1503963 /UG=Hs.151761 KIAA0100 gene product /FL=gb:D43947.1 gb:NM_014680.1
201729_s_at	800.4	P	0.000244	gb:NM_014680.1 /DEF=Homo sapiens KIAA0100 gene product (KIAA0100), mRNA. /FEA=mRNA /GEN=KIAA0100 /PROD=KIAA0100 gene product /DB_XREF=gi:7661903 /UG=Hs.151761 KIAA0100 gene product /FL=gb:D43947.1 gb:NM_014680.1
201730_s_at	1118.6	P	0.000244	Consensus includes gb:BF110993 /FEA=EST /DB_XREF=gi:10940683 /DB_XREF=est:7n42e09.x1 /CLONE=IMAGE:3567448 /UG=Hs.169750 translocated promoter region (to activated MET oncogene) /FL=gb:NM_003292.1
201731_s_at	775.4	P	0.000244	gb:NM_003292.1 /DEF=Homo sapiens translocated promoter region (to activated MET oncogene) (TPR), mRNA. /FEA=mRNA /GEN=TPR /PROD=translocated promoter region (to activated METoncogene) /DB_XREF=gi:4507658 /UG=Hs.169750 translocated promoter region (to activated MET oncogene) /FL=gb:NM_003292.1
201732_s_at	156.8	P	0.001953	Consensus includes gb:AF029346.1 /DEF=Homo sapiens chloride channel protein 3 (CLCN3) mRNA, complete cds. /FEA=CDS /GEN=CLCN3 /PROD=chloride channel protein 3 /DB_XREF=gi:2599547 /UG=Hs.174139 chloride channel 3 /FL=gb:AF029346.1 gb:NM_001829.1 gb:AF172729.1
201733_at	32.6	P	0.018555	Consensus includes gb:AA902971 /FEA=EST /DB_XREF=gi:3038094 /DB_XREF=est:ok44c09.s1 /CLONE=IMAGE:1516816 /UG=Hs.174139 chloride channel 3 /FL=gb:AF029346.1 gb:NM_001829.1 gb:AF172729.1
201734_at	484.7	P	0.000244	Consensus includes gb:AI760629 /FEA=EST /DB_XREF=gi:5176296 /DB_XREF=est:wi66e06.x1 /CLONE=IMAGE:2398306 /UG=Hs.174139 chloride channel 3 /FL=gb:AF029346.1 gb:NM_001829.1 gb:AF172729.1
201735_s_at	291.2	P	0.000244	gb:NM_001829.1 /DEF=Homo sapiens chloride channel 3 (CLCN3), mRNA. /FEA=mRNA /GEN=CLCN3 /PROD=chloride channel 3 /DB_XREF=gi:4502868 /UG=Hs.174139 chloride channel 3 /FL=gb:AF029346.1 gb:NM_001829.1 gb:AF172729.1
201736_s_at	1409.7	P	0.000244	Consensus includes gb:BF000409 /FEA=EST /DB_XREF=gi:10700684 /DB_XREF=est:7h27h07.x1 /CLONE=IMAGE:3317245 /UG=Hs.20141 similar to S. cerevisiae SSM4 /FL=gb:AF009301.1 gb:NM_005885.1
201737_s_at	444.6	P	0.000244	gb:NM_005885.1 /DEF=Homo sapiens similar to S. cerevisiae SSM4 (TEB4), mRNA. /FEA=mRNA /GEN=TEB4 /PROD=similar to S. cerevisiae SSM4 /DB_XREF=gi:5032166 /UG=Hs.20141 similar to S. cerevisiae SSM4 /FL=gb:AF009301.1 gb:NM_005885.1
201738_at	1870.9	P	0.000244	gb:NM_005875.1 /DEF=Homo sapiens translation factor sui1 homolog (GC20), mRNA. /FEA=mRNA /GEN=GC20 /PROD=translation factor sui1 homolog /DB_XREF=gi:5031710 /UG=Hs.21756 translation factor sui1 homolog /FL=gb:AF064607.1 gb:AF077052.1 gb:NM_005875.1 gb:AF263452.1
201739_at	111.8	P	0.000244	gb:NM_005627.1 /DEF=Homo sapiens serumglucocorticoid regulated kinase (SGK), mRNA. /FEA=mRNA /GEN=SGK /PROD=serumglucocorticoid regulated kinase /DB_XREF=gi:5032090 /UG=Hs.296323 serumglucocorticoid regulated kinase /FL=gb:BC001263.1 gb:NM_005627.1 gb:AF153609.1
201740_at	1644.4	P	0.000244	gb:NM_004551.1 /DEF=Homo sapiens NADH dehydrogenase (ubiquinone) Fe-S protein 3 (30kD) (NADH-coenzyme Q reductase) (NDUFS3), mRNA. /FEA=mRNA /GEN=NDUFS3 /PROD=NADH dehydrogenase (ubiquinone) Fe-S protein 3(30kD) (NADH-coenzyme Q reductase) /DB_XREF=gi:4758787 /UG=Hs.5273 NADH dehydrogenase (ubiquinone) Fe-S protein 3 (30kD) (NADH-coenzyme Q reductase) /FL=gb:BC000617.1 gb:AF067139.1 gb:NM_004551.…
201741_x_at	17.7	A	0.129639	Consensus includes gb:M69040.1 /DEF=Human SF2p33 mRNA, complete cds. /FEA=mRNA /PROD=SF2p33 /DB_XREF=gi:338046 /UG=Hs.73737 splicing factor, arginineserine-rich 1 (splicing factor 2, alternate splicing factor) /FL=gb:M69040.1 gb:NM_006924.1
201742_x_at	722.5	P	0.000244	gb:NM_006924.1 /DEF=Homo sapiens splicing factor, arginineserine-rich 1 (splicing factor 2, alternate splicing factor) (SFRS1), mRNA. /FEA=mRNA /GEN=SFRS1 /PROD=splicing factor, arginineserine-rich 1(splicing factor 2, alternate splicing factor) /DB_XREF=gi:5902075 /UG=Hs.73737 splicing factor, arginineserine-rich 1 (splicing factor 2, alternate splicing factor) /FL=gb:M69040.1 gb:NM_006924.1
201743_at	4.2	A	0.567627	gb:NM_000591.1 /DEF=Homo sapiens CD14 antigen (CD14), mRNA. /FEA=mRNA /GEN=CD14 /PROD=CD14 antigen precursor /DB_XREF=gi:4557416 /UG=Hs.75627 CD14 antigen /FL=gb:M86511.1 gb:AF097942.1 gb:NM_000591.1
201744_s_at	7.5	A	0.334473	gb:NM_002345.1 /DEF=Homo sapiens lumican (LUM), mRNA. /FEA=mRNA /GEN=LUM /PROD=lumican /DB_XREF=gi:4505046 /UG=Hs.79914 lumican /FL=gb:NM_002345.1 gb:U18728.1 gb:U21128.1
201745_at	1368.6	P	0.000244	gb:NM_002822.1 /DEF=Homo sapiens protein tyrosine kinase 9 (PTK9), mRNA. /FEA=mRNA /GEN=PTK9 /PROD=protein tyrosine kinase 9 /DB_XREF=gi:4506274 /UG=Hs.82643 protein tyrosine kinase 9 /FL=gb:NM_002822.1 gb:U02680.1
201746_at	179.6	P	0.002930	gb:NM_000546.2 /DEF=Homo sapiens tumor protein p53 (Li-Fraumeni syndrome) (TP53), mRNA. /FEA=mRNA /GEN=TP53 /PROD=tumor protein p53 /DB_XREF=gi:8400737 /UG=Hs.1846 tumor protein p53 (Li-Fraumeni syndrome) /FL=gb:AF307851.1 gb:BC003596.1 gb:M14694.1 gb:M14695.1 gb:NM_000546.2
201747_s_at	63.2	P	0.010742	Consensus includes gb:AI769566 /FEA=EST /DB_XREF=gi:5236075 /DB_XREF=est:wj24e11.x1 /CLONE=IMAGE:2403788 /UG=Hs.23978 scaffold attachment factor B /FL=gb:U72355.1 gb:NM_002967.1
201748_s_at	261.4	P	0.000732	gb:NM_002967.1 /DEF=Homo sapiens scaffold attachment factor B (SAFB), mRNA. /FEA=mRNA /GEN=SAFB /PROD=scaffold attachment factor B /DB_XREF=gi:4506778 /UG=Hs.23978 scaffold attachment factor B /FL=gb:U72355.1 gb:NM_002967.1
201749_at	122.5	P	0.005859	Consensus includes gb:BF969352 /FEA=EST /DB_XREF=gi:12336567 /DB_XREF=est:602271616F1 /CLONE=IMAGE:4359794 /UG=Hs.288203 endothelin converting enzyme 1 /FL=gb:NM_001397.1 gb:AB031742.1 gb:D49471.1
201750_s_at	25.6	A	0.171387	gb:NM_001397.1 /DEF=Homo sapiens endothelin converting enzyme 1 (ECE1), mRNA. /FEA=mRNA /GEN=ECE1 /PROD=endothelin converting enzyme 1 /DB_XREF=gi:4503442 /UG=Hs.288203 endothelin converting enzyme 1 /FL=gb:NM_001397.1 gb:AB031742.1 gb:D49471.1
201751_at	384.7	P	0.000244	gb:NM_014876.1 /DEF=Homo sapiens KIAA0063 gene product (KIAA0063), mRNA. /FEA=mRNA /GEN=KIAA0063 /PROD=KIAA0063 gene product /DB_XREF=gi:7661887 /UG=Hs.3094 KIAA0063 gene product /FL=gb:D31884.1 gb:NM_014876.1
201752_s_at	77.2	P	0.001221	Consensus includes gb:AI763123 /FEA=EST /DB_XREF=gi:5178790 /DB_XREF=est:wi06f09.x1 /CLONE=IMAGE:2389481 /UG=Hs.324470 adducin 3 (gamma) /FL=gb:D67031.1 gb:NM_019903.1
201753_s_at	71.1	P	0.000244	gb:NM_019903.1 /DEF=Homo sapiens adducin 3 (gamma) (ADD3), transcript variant 2, mRNA. /FEA=mRNA /GEN=ADD3 /PROD=adducin 3, isoform b /DB_XREF=gi:9951926 /UG=Hs.324470 adducin 3 (gamma) /FL=gb:D67031.1 gb:NM_019903.1
201754_at	12753.1	P	0.000244	gb:NM_004374.1 /DEF=Homo sapiens cytochrome c oxidase subunit VIc (COX6C), nuclear gene encoding mitochondrial protein, mRNA. /FEA=mRNA /GEN=COX6C /PROD=cytochrome c oxidase subunit VIc /DB_XREF=gi:4758039 /UG=Hs.74649 cytochrome c oxidase subunit VIc /FL=gb:BC000187.1 gb:NM_004374.1
201755_at	60.0	A	0.067627	gb:NM_006739.1 /DEF=Homo sapiens minichromosome maintenance deficient (S. cerevisiae) 5 (cell division cycle 46) (MCM5), mRNA. /FEA=mRNA /GEN=MCM5 /PROD=minichromosome maintenance deficient (S.cerevisiae) 5 (cell division cycle 46) /DB_XREF=gi:6981191 /UG=Hs.77171 minichromosome maintenance deficient (S. cerevisiae) 5 (cell division cycle 46) /FL=gb:D83986.1 gb:BC000142.1 gb:BC003656.1 gb:NM_0067…
201756_at	515.9	P	0.000244	gb:NM_002946.1 /DEF=Homo sapiens replication protein A2 (32kD) (RPA2), mRNA. /FEA=mRNA /GEN=RPA2 /PROD=replication protein A2 (32kD) /DB_XREF=gi:4506584 /UG=Hs.79411 replication protein A2 (32kD) /FL=gb:BC001630.1 gb:J05249.1 gb:NM_002946.1
201757_at	5167.1	P	0.000244	gb:NM_004552.1 /DEF=Homo sapiens NADH dehydrogenase (ubiquinone) Fe-S protein 5 (15kD) (NADH-coenzyme Q reductase) (NDUFS5), mRNA. /FEA=mRNA /GEN=NDUFS5 /PROD=NADH dehydrogenase (ubiquinone) Fe-S protein 5(15kD) (NADH-coenzyme Q reductase) /DB_XREF=gi:4758789 /UG=Hs.80595 NADH dehydrogenase (ubiquinone) Fe-S protein 5 (15kD) (NADH-coenzyme Q reductase) /FL=gb:BC001884.1 gb:AF020352.1 gb:AF047434.…
201758_at	1492.5	P	0.000244	gb:NM_006292.1 /DEF=Homo sapiens tumor susceptibility gene 101 (TSG101), mRNA. /FEA=mRNA /GEN=TSG101 /PROD=tumor susceptibility gene 101 /DB_XREF=gi:5454139 /UG=Hs.118910 tumor susceptibility gene 101 /FL=gb:BC002487.1 gb:U82130.1 gb:NM_006292.1
201759_at	58.1	P	0.014160	Consensus includes gb:AW247323 /FEA=EST /DB_XREF=gi:6590316 /DB_XREF=est:2819524.3prime /CLONE=IMAGE:2819524 /UG=Hs.12570 tubulin-specific chaperone d /FL=gb:BC003094.1 gb:AB023205.1 gb:NM_005993.2
201760_s_at	1560.4	P	0.000244	gb:NM_018639.1 /DEF=Homo sapiens CS box-containing WD protein (LOC55884), mRNA. /FEA=mRNA /GEN=LOC55884 /PROD=CS box-containing WD protein /DB_XREF=gi:8923880 /UG=Hs.136644 CS box-containing WD protein /FL=gb:AF229181.1 gb:AF163324.1 gb:NM_018639.1
201761_at	1486.2	P	0.000244	gb:NM_006636.2 /DEF=Homo sapiens methylene tetrahydrofolate dehydrogenase (NAD+ dependent), methenyltetrahydrofolate cyclohydrolase (MTHFD2), nuclear gene encoding mitochondrial protein, mRNA. /FEA=mRNA /GEN=MTHFD2 /PROD=methylene tetrahydrofolate dehydrogenase (NAD+dependent), methenyltetrahydrofolate cyclohydrolase,precursor /DB_XREF=gi:13699869 /UG=Hs.154672 methylene tetrahydrofolate dehydrog…
201762_s_at	4806.1	P	0.000244	gb:NM_002818.1 /DEF=Homo sapiens proteasome (prosome, macropain) activator subunit 2 (PA28 beta) (PSME2), mRNA. /FEA=mRNA /GEN=PSME2 /PROD=proteasome (prosome, macropain) activatorsubunit 2 (PA28 beta) /DB_XREF=gi:4506236 /UG=Hs.179774 proteasome (prosome, macropain) activator subunit 2 (PA28 beta) /FL=gb:D45248.1 gb:BC004368.1 gb:NM_002818.1
201763_s_at	155.5	P	0.000732	gb:NM_001350.1 /DEF=Homo sapiens death-associated protein 6 (DAXX), mRNA. /FEA=mRNA /GEN=DAXX /PROD=death-associated protein 6 /DB_XREF=gi:4503256 /UG=Hs.180224 death-associated protein 6 /FL=gb:AF015956.2 gb:AF039136.1 gb:AF050179.1 gb:AF097742.1 gb:AB015051.1 gb:NM_001350.1
201764_at	2603.3	P	0.000244	gb:NM_024056.1 /DEF=Homo sapiens hypothetical protein MGC5576 (MGC5576), mRNA. /FEA=mRNA /GEN=MGC5576 /PROD=hypothetical protein MGC5576 /DB_XREF=gi:13129025 /UG=Hs.103834 hypothetical protein MGC5576 /FL=gb:BC000854.1 gb:NM_024056.1
201765_s_at	1237.4	P	0.000244	Consensus includes gb:AL523158 /FEA=EST /DB_XREF=gi:12786651 /DB_XREF=est:AL523158 /CLONE=CS0DC001YM06 (3 prime) /UG=Hs.119403 hexosaminidase A (alpha polypeptide) /FL=gb:NM_000520.2
201766_at	9.3	A	0.525635	Consensus includes gb:AF304370.1 /DEF=Homo sapiens putative prostate cancer susceptibility protein HPC2ELAC2 mRNA, complete cds. /FEA=mRNA /PROD=putative prostate cancer susceptibility proteinHPC2ELAC2 /DB_XREF=gi:10880932 /UG=Hs.12124 putative prostate cancer susceptibility protein /FL=gb:AF304370.1 gb:NM_018127.2 gb:BC001939.1 gb:BC004158.1
201767_s_at	367.3	P	0.000244	gb:NM_018127.2 /DEF=Homo sapiens putative prostate cancer susceptibility protein (HPC2), mRNA. /FEA=mRNA /GEN=HPC2 /PROD=putative prostate cancer susceptibility protein /DB_XREF=gi:11875212 /UG=Hs.12124 putative prostate cancer susceptibility protein /FL=gb:AF304370.1 gb:NM_018127.2 gb:BC001939.1 gb:BC004158.1
201768_s_at	189.8	P	0.000732	gb:BC004467.1 /DEF=Homo sapiens, KIAA0171 gene product, clone MGC:10257, mRNA, complete cds. /FEA=mRNA /PROD=KIAA0171 gene product /DB_XREF=gi:13325306 /UG=Hs.155623 KIAA0171 gene product /FL=gb:D79993.1 gb:BC004467.1 gb:NM_014666.1
201769_at	1239.1	P	0.000244	gb:NM_014666.1 /DEF=Homo sapiens KIAA0171 gene product (KIAA0171), mRNA. /FEA=mRNA /GEN=KIAA0171 /PROD=KIAA0171 gene product /DB_XREF=gi:7661967 /UG=Hs.155623 KIAA0171 gene product /FL=gb:D79993.1 gb:BC004467.1 gb:NM_014666.1
201770_at	733.5	P	0.000244	gb:NM_004596.1 /DEF=Homo sapiens small nuclear ribonucleoprotein polypeptide A (SNRPA), mRNA. /FEA=mRNA /GEN=SNRPA /PROD=small nuclear ribonucleoprotein polypeptide A /DB_XREF=gi:4759155 /UG=Hs.173255 small nuclear ribonucleoprotein polypeptide A /FL=gb:BC000405.1 gb:NM_004596.1
201771_at	421.5	P	0.000732	gb:NM_005698.1 /DEF=Homo sapiens secretory carrier membrane protein 3 (SCAMP3), mRNA. /FEA=mRNA /GEN=SCAMP3 /PROD=secretory carrier membrane protein 3 /DB_XREF=gi:5032076 /UG=Hs.200600 secretory carrier membrane protein 3 /FL=gb:BC000161.2 gb:BC005135.1 gb:AF005039.1 gb:NM_005698.1
201772_at	1088.5	P	0.000244	gb:NM_015878.1 /DEF=Homo sapiens antizyme inhibitor (LOC51582), mRNA. /FEA=mRNA /GEN=LOC51582 /PROD=antizyme inhibitor /DB_XREF=gi:7706219 /UG=Hs.223014 antizyme inhibitor /FL=gb:D88674.1 gb:NM_015878.1
201773_at	2961.8	P	0.000244	gb:NM_015339.1 /DEF=Homo sapiens activity-dependent neuroprotective protein (ADNP), mRNA. /FEA=mRNA /GEN=ADNP /PROD=activity-dependent neuroprotective protein /DB_XREF=gi:12229216 /UG=Hs.3657 activity-dependent neuroprotective protein /FL=gb:AF250860.1 gb:NM_015339.1
201774_s_at	168.4	P	0.000244	Consensus includes gb:AK022511.1 /DEF=Homo sapiens cDNA FLJ12449 fis, clone NT2RM1000314, highly similar to Human mRNA for KIAA0159 gene. /FEA=mRNA /DB_XREF=gi:10433940 /UG=Hs.5719 chromosome condensation-related SMC-associated protein 1 /FL=gb:NM_014865.1 gb:D63880.1
201775_s_at	82.1	P	0.004150	Consensus includes gb:AA676790 /FEA=EST /DB_XREF=gi:2657312 /DB_XREF=est:zj64h12.s1 /CLONE=IMAGE:455111 /UG=Hs.62515 KIAA0494 gene product /FL=gb:BC002525.1 gb:AB007963.1 gb:NM_014774.1
201776_s_at	380.0	P	0.000244	Consensus includes gb:AK001487.1 /DEF=Homo sapiens cDNA FLJ10625 fis, clone NT2RP2005540, highly similar to Homo sapiens mRNA for KIAA0494 protein. /FEA=mRNA /DB_XREF=gi:7022773 /UG=Hs.62515 KIAA0494 gene product /FL=gb:BC002525.1 gb:AB007963.1 gb:NM_014774.1
201777_s_at	134.9	P	0.001221	gb:BC002525.1 /DEF=Homo sapiens, KIAA0494 gene product, clone MGC:1949, mRNA, complete cds. /FEA=mRNA /PROD=KIAA0494 gene product /DB_XREF=gi:12803404 /UG=Hs.62515 KIAA0494 gene product /FL=gb:BC002525.1 gb:AB007963.1 gb:NM_014774.1
201778_s_at	959.9	P	0.000732	gb:NM_014774.1 /DEF=Homo sapiens KIAA0494 gene product (KIAA0494), mRNA. /FEA=mRNA /GEN=KIAA0494 /PROD=KIAA0494 gene product /DB_XREF=gi:7662159 /UG=Hs.62515 KIAA0494 gene product /FL=gb:BC002525.1 gb:AB007963.1 gb:NM_014774.1
201779_s_at	1531.4	P	0.000244	gb:AF070558.1 /DEF=Homo sapiens clone 24450 RING zinc finger protein RZF mRNA, complete cds. /FEA=mRNA /PROD=RING zinc finger protein RZF /DB_XREF=gi:3387924 /UG=Hs.6900 ring finger protein 13 /FL=gb:AF037204.1 gb:AF070558.1 gb:NM_007282.1
201780_s_at	638.7	P	0.000244	gb:NM_007282.1 /DEF=Homo sapiens ring finger protein 13 (RNF13), mRNA. /FEA=mRNA /GEN=RNF13 /PROD=ring finger protein 13 /DB_XREF=gi:6005863 /UG=Hs.6900 ring finger protein 13 /FL=gb:AF037204.1 gb:AF070558.1 gb:NM_007282.1
201781_s_at	337.6	P	0.000244	Consensus includes gb:AL558532 /FEA=EST /DB_XREF=gi:12903142 /DB_XREF=est:AL558532 /CLONE=CS0DJ006YJ15 (5 prime) /UG=Hs.75305 aryl hydrocarbon receptor-interacting protein /FL=gb:U31913.1 gb:U78521.1 gb:NM_003977.1
201782_s_at	553.9	P	0.000244	gb:NM_003977.1 /DEF=Homo sapiens aryl hydrocarbon receptor-interacting protein (AIP), mRNA. /FEA=mRNA /GEN=AIP /PROD=aryl hydrocarbon receptor-interacting protein /DB_XREF=gi:4502008 /UG=Hs.75305 aryl hydrocarbon receptor-interacting protein /FL=gb:U31913.1 gb:U78521.1 gb:NM_003977.1
201783_s_at	564.5	P	0.000244	gb:NM_021975.1 /DEF=Homo sapiens v-rel avian reticuloendotheliosis viral oncogene homolog A (nuclear factor of kappa light polypeptide gene enhancer in B-cells 3 (p65)) (RELA), mRNA. /FEA=mRNA /GEN=RELA /PROD=v-rel avian reticuloendotheliosis viral oncogenehomolog A (nuclear factor of kappa light polypeptide geneenhancer in B-cells 3 (p65)) /DB_XREF=gi:11496238 /UG=Hs.75569 v-rel avian reticuloen…
201784_s_at	2300.7	P	0.000244	gb:NM_014267.1 /DEF=Homo sapiens small acidic protein (IMAGE145052), mRNA. /FEA=mRNA /GEN=IMAGE145052 /PROD=small acidic protein /DB_XREF=gi:7657233 /UG=Hs.78050 small acidic protein /FL=gb:U51678.1 gb:NM_014267.1
201785_at	22.5	A	0.432373	gb:NM_002933.1 /DEF=Homo sapiens ribonuclease, RNase A family, 1 (pancreatic) (RNASE1), mRNA. /FEA=mRNA /GEN=RNASE1 /PROD=ribonuclease, RNase A family, 1 (pancreatic) /DB_XREF=gi:4506546 /UG=Hs.78224 ribonuclease, RNase A family, 1 (pancreatic) /FL=gb:BC005324.1 gb:NM_002933.1 gb:D26129.1
201786_s_at	3269.3	P	0.000244	gb:NM_001111.2 /DEF=Homo sapiens adenosine deaminase, RNA-specific (ADAR), transcript variant ADAR-a, mRNA. /FEA=mRNA /GEN=ADAR /PROD=adenosine deaminase, RNA-specific, isoformADAR-a /DB_XREF=gi:7669471 /UG=Hs.7957 adenosine deaminase, RNA-specific /FL=gb:U10439.1 gb:NM_001111.2 gb:U18121.1
201787_at	29.5	A	0.080566	gb:NM_001996.1 /DEF=Homo sapiens fibulin 1 (FBLN1), transcript variant C, mRNA. /FEA=mRNA /GEN=FBLN1 /PROD=fibulin 1 isoform C precursor /DB_XREF=gi:4503662 /UG=Hs.79732 fibulin 1 /FL=gb:NM_001996.1
201788_at	1574.7	P	0.000244	gb:NM_007372.1 /DEF=Homo sapiens RNA helicase-related protein (RNAHP), mRNA. /FEA=mRNA /GEN=RNAHP /PROD=RNA helicase-related protein /DB_XREF=gi:11321631 /UG=Hs.8765 RNA helicase-related protein /FL=gb:NM_007372.1 gb:AF083255.1
201789_at	3.3	A	0.466064	Consensus includes gb:BC000637.1 /DEF=Homo sapiens, CGI-86 protein, clone MGC:681, mRNA, complete cds. /FEA=mRNA /PROD=CGI-86 protein /DB_XREF=gi:12653704 /UG=Hs.109201 CGI-86 protein /FL=gb:BC000637.1 gb:AF151844.1 gb:NM_016029.1
201790_s_at	185.8	P	0.010742	Consensus includes gb:AW150953 /FEA=EST /DB_XREF=gi:6198851 /DB_XREF=est:xg42f09.x1 /CLONE=IMAGE:2630249 /UG=Hs.11806 7-dehydrocholesterol reductase /FL=gb:BC000054.1 gb:AF034544.1 gb:AF067127.1 gb:AF096305.1 gb:NM_001360.1
201791_s_at	384.0	P	0.005859	gb:NM_001360.1 /DEF=Homo sapiens 7-dehydrocholesterol reductase (DHCR7), mRNA. /FEA=mRNA /GEN=DHCR7 /PROD=7-dehydrocholesterol reductase /DB_XREF=gi:4503320 /UG=Hs.11806 7-dehydrocholesterol reductase /FL=gb:BC000054.1 gb:AF034544.1 gb:AF067127.1 gb:AF096305.1 gb:NM_001360.1
201792_at	38.5	A	0.111572	gb:NM_001129.2 /DEF=Homo sapiens AE-binding protein 1 (AEBP1), mRNA. /FEA=mRNA /GEN=AEBP1 /PROD=adipocyte enhancer binding protein 1 precursor /DB_XREF=gi:4755145 /UG=Hs.118397 AE-binding protein 1 /FL=gb:D86479.1 gb:AF053944.1 gb:NM_001129.2
201793_x_at	63.5	P	0.002930	Consensus includes gb:BF509099 /FEA=EST /DB_XREF=gi:11592397 /DB_XREF=est:UI-H-BI4-aou-e-05-0-UI.s1 /CLONE=IMAGE:3086288 /UG=Hs.15087 KIAA0250 gene product /FL=gb:D87437.1 gb:NM_014837.1
201794_s_at	552.9	P	0.000732	gb:NM_014837.1 /DEF=Homo sapiens KIAA0250 gene product (KIAA0250), mRNA. /FEA=mRNA /GEN=KIAA0250 /PROD=KIAA0250 gene product /DB_XREF=gi:7662023 /UG=Hs.15087 KIAA0250 gene product /FL=gb:D87437.1 gb:NM_014837.1
201795_at	384.5	P	0.000732	gb:NM_002296.1 /DEF=Homo sapiens lamin B receptor (LBR), mRNA. /FEA=mRNA /GEN=LBR /PROD=lamin B receptor /DB_XREF=gi:4504960 /UG=Hs.152931 lamin B receptor /FL=gb:L25931.1 gb:NM_002296.1
201796_s_at	4.6	A	0.828613	Consensus includes gb:BE790854 /FEA=EST /DB_XREF=gi:10212052 /DB_XREF=est:601582271F1 /CLONE=IMAGE:3936952 /UG=Hs.159637 valyl-tRNA synthetase 2 /FL=gb:NM_006295.1
201797_s_at	135.3	P	0.001953	gb:NM_006295.1 /DEF=Homo sapiens valyl-tRNA synthetase 2 (VARS2), mRNA. /FEA=mRNA /GEN=VARS2 /PROD=valyl-tRNA synthetase 2 /DB_XREF=gi:5454157 /UG=Hs.159637 valyl-tRNA synthetase 2 /FL=gb:NM_006295.1
201798_s_at	1778.1	P	0.000244	gb:NM_013451.1 /DEF=Homo sapiens fer-1 (C.elegans)-like 3 (myoferlin) (FER1L3), mRNA. /FEA=mRNA /GEN=FER1L3 /PROD=fer-1 (C.elegans)-like 3 (myoferlin) /DB_XREF=gi:7305052 /UG=Hs.234680 fer-1 (C.elegans)-like 3 (myoferlin) /FL=gb:AF182316.1 gb:NM_013451.1
201799_s_at	105.8	P	0.004150	Consensus includes gb:AI927993 /FEA=EST /DB_XREF=gi:5663957 /DB_XREF=est:wo92c11.x1 /CLONE=IMAGE:2462804 /UG=Hs.24734 oxysterol binding protein /FL=gb:AF185696.1 gb:M86917.1 gb:NM_002556.1
201800_s_at	243.8	P	0.000244	gb:AF185696.1 /DEF=Homo sapiens oxysterol-binding protein 1 (OSBP1) mRNA, complete cds. /FEA=mRNA /GEN=OSBP1 /PROD=oxysterol-binding protein 1 /DB_XREF=gi:10441379 /UG=Hs.24734 oxysterol binding protein /FL=gb:AF185696.1 gb:M86917.1 gb:NM_002556.1
201801_s_at	13.8	A	0.095215	gb:AF079117.1 /DEF=Homo sapiens equilibrative NBMPR-sensitive nucleoside transporter (ENT1) mRNA, complete cds. /FEA=mRNA /GEN=ENT1 /PROD=equilibrative NBMPR-sensitive nucleosidetransporter /DB_XREF=gi:3694939 /UG=Hs.25450 solute carrier family 29 (nucleoside transporters), member 1 /FL=gb:BC001382.1 gb:U81375.1 gb:AF079117.1 gb:NM_004955.1
201802_at	55.8	P	0.046143	gb:NM_004955.1 /DEF=Homo sapiens solute carrier family 29 (nucleoside transporters), member 1 (SLC29A1), mRNA. /FEA=mRNA /GEN=SLC29A1 /PROD=solute carrier family 29 (nucleosidetransporters), member 1 /DB_XREF=gi:4826715 /UG=Hs.25450 solute carrier family 29 (nucleoside transporters), member 1 /FL=gb:BC001382.1 gb:U81375.1 gb:AF079117.1 gb:NM_004955.1
201803_at	1107.0	P	0.000244	gb:NM_000938.1 /DEF=Homo sapiens polymerase (RNA) II (DNA directed) polypeptide B (140kD) (POLR2B), mRNA. /FEA=mRNA /GEN=POLR2B /PROD=polymerase (RNA) II (DNA directed) polypeptide B(140kD) /DB_XREF=gi:4505940 /UG=Hs.296014 polymerase (RNA) II (DNA directed) polypeptide B (140kD) /FL=gb:NM_000938.1
201804_x_at	1351.0	P	0.000244	gb:NM_001281.1 /DEF=Homo sapiens cytoskeleton-associated protein 1 (CKAP1), mRNA. /FEA=mRNA /GEN=CKAP1 /PROD=CKAP1 /DB_XREF=gi:4502848 /UG=Hs.31053 cytoskeleton-associated protein 1 /FL=gb:AF013488.1 gb:NM_001281.1 gb:D49738.1
201805_at	737.0	P	0.000244	gb:NM_002733.1 /DEF=Homo sapiens protein kinase, AMP-activated, gamma 1 non-catalytic subunit (PRKAG1), mRNA. /FEA=mRNA /GEN=PRKAG1 /PROD=protein kinase, AMP-activated, gamma 1non-catalytic subunit /DB_XREF=gi:4506060 /UG=Hs.3136 protein kinase, AMP-activated, gamma 1 non-catalytic subunit /FL=gb:BC000358.1 gb:U42412.1 gb:NM_002733.1
201806_s_at	31.7	A	0.129639	gb:NM_007245.1 /DEF=Homo sapiens ataxin 2 related protein (A2LP), transcript variant 1, mRNA. /FEA=mRNA /GEN=A2LP /PROD=ataxin 2 related protein, isoform 1 /DB_XREF=gi:6005698 /UG=Hs.43509 ataxin 2 related protein /FL=gb:AF034373.1 gb:NM_007245.1
201807_at	1396.7	P	0.000244	gb:NM_004896.1 /DEF=Homo sapiens vacuolar protein sorting 26 (yeast homolog) (VPS26), mRNA. /FEA=mRNA /GEN=VPS26 /PROD=vacuolar protein sorting 26 (yeast homolog) /DB_XREF=gi:4758509 /UG=Hs.67052 vacuolar protein sorting 26 (yeast homolog) /FL=gb:AF054179.1 gb:NM_004896.1 gb:AF175266.1
201808_s_at	4.6	A	0.725830	Consensus includes gb:BE732652 /FEA=EST /DB_XREF=gi:10146644 /DB_XREF=est:601571266F1 /CLONE=IMAGE:3925601 /UG=Hs.76753 endoglin (Osler-Rendu-Weber syndrome 1) /FL=gb:NM_000118.1
201809_s_at	2.7	A	0.888428	gb:NM_000118.1 /DEF=Homo sapiens endoglin (Osler-Rendu-Weber syndrome 1) (ENG), mRNA. /FEA=mRNA /GEN=ENG /PROD=endoglin precursor /DB_XREF=gi:4557554 /UG=Hs.76753 endoglin (Osler-Rendu-Weber syndrome 1) /FL=gb:NM_000118.1
201810_s_at	1627.6	P	0.000244	Consensus includes gb:AL562152 /FEA=EST /DB_XREF=gi:12910291 /DB_XREF=est:AL562152 /CLONE=CS0DC001YK23 (3 prime) /UG=Hs.109150 SH3-domain binding protein 5 (BTK-associated) /FL=gb:AB005047.1 gb:NM_004844.1
201811_x_at	3684.7	P	0.000244	gb:NM_004844.1 /DEF=Homo sapiens SH3-domain binding protein 5 (BTK-associated) (SH3BP5), mRNA. /FEA=mRNA /GEN=SH3BP5 /PROD=SH3-domain binding protein 5 (BTK-associated) /DB_XREF=gi:4759057 /UG=Hs.109150 SH3-domain binding protein 5 (BTK-associated) /FL=gb:AB005047.1 gb:NM_004844.1
201812_s_at	3149.5	P	0.000244	gb:NM_019059.1 /DEF=Homo sapiens 6.2 kd protein (LOC54543), mRNA. /FEA=mRNA /GEN=LOC54543 /PROD=6.2 kd protein /DB_XREF=gi:9506858 /UG=Hs.112318 6.2 kd protein /FL=gb:BC001732.1 gb:AF150733.1 gb:NM_019059.1
201813_s_at	377.4	P	0.004150	Consensus includes gb:AI654161 /FEA=EST /DB_XREF=gi:4738140 /DB_XREF=est:ty62e04.x1 /CLONE=IMAGE:2283678 /UG=Hs.115740 KIAA0210 gene product /FL=gb:D86965.1 gb:NM_014744.1
201814_at	802.2	P	0.001221	Consensus includes gb:AI300084 /FEA=EST /DB_XREF=gi:3959430 /DB_XREF=est:qn59f02.x1 /CLONE=IMAGE:1902555 /UG=Hs.115740 KIAA0210 gene product /FL=gb:D86965.1 gb:NM_014744.1
201815_s_at	50.3	P	0.001953	gb:NM_014744.1 /DEF=Homo sapiens KIAA0210 gene product (KIAA0210), mRNA. /FEA=mRNA /GEN=KIAA0210 /PROD=KIAA0210 gene product /DB_XREF=gi:7661997 /UG=Hs.115740 KIAA0210 gene product /FL=gb:D86965.1 gb:NM_014744.1
201816_s_at	808.2	P	0.000244	gb:NM_001483.1 /DEF=Homo sapiens glioblastoma amplified sequence (GBAS), mRNA. /FEA=mRNA /GEN=GBAS /PROD=glioblastoma amplified sequence /DB_XREF=gi:4503936 /UG=Hs.152707 glioblastoma amplified sequence /FL=gb:BC000732.1 gb:BC001837.1 gb:AF029786.1 gb:NM_001483.1
201817_at	719.4	P	0.000244	gb:NM_014671.1 /DEF=Homo sapiens KIAA0010 gene product (KIAA0010), mRNA. /FEA=mRNA /GEN=KIAA0010 /PROD=KIAA0010 gene product /DB_XREF=gi:7661855 /UG=Hs.155287 KIAA0010 gene product /FL=gb:D13635.1 gb:NM_014671.1
201818_at	1106.1	P	0.000732	gb:NM_024830.1 /DEF=Homo sapiens hypothetical protein FLJ12443 (FLJ12443), mRNA. /FEA=mRNA /GEN=FLJ12443 /PROD=hypothetical protein FLJ12443 /DB_XREF=gi:13376233 /UG=Hs.179882 hypothetical protein FLJ12443 /FL=gb:NM_024830.1
201819_at	125.7	P	0.014160	gb:NM_005505.1 /DEF=Homo sapiens CD36 antigen (collagen type I receptor, thrombospondin receptor)-like 1 (CD36L1), mRNA. /FEA=mRNA /GEN=CD36L1 /PROD=CD36 antigen (collagen type I receptor,thrombospondin receptor)-like 1 /DB_XREF=gi:5031628 /UG=Hs.180616 CD36 antigen (collagen type I receptor, thrombospondin receptor)-like 1 /FL=gb:NM_005505.1
201820_at	1.9	A	0.753906	gb:NM_000424.1 /DEF=Homo sapiens keratin 5 (epidermolysis bullosa simplex, Dowling-MearaKobnerWeber-Cockayne types) (KRT5), mRNA. /FEA=mRNA /GEN=KRT5 /PROD=keratin 5 (epidermolysis bullosa simplex,Dowling-MearaKobnerWeber-Cockayne types) /DB_XREF=gi:4557889 /UG=Hs.195850 keratin 5 (epidermolysis bullosa simplex, Dowling-MearaKobnerWeber-Cockayne types) /FL=gb:M21389.1 gb:NM_000424.1
201821_s_at	1309.2	P	0.000244	gb:BC004439.1 /DEF=Homo sapiens, translocase of inner mitochondrial membrane 17 (yeast) homolog A, clone MGC:4031, mRNA, complete cds. /FEA=mRNA /PROD=translocase of inner mitochondrial membrane 17(yeast) homolog A /DB_XREF=gi:13325239 /UG=Hs.20716 translocase of inner mitochondrial membrane 17 (yeast) homolog A /FL=gb:BC004439.1 gb:AF106622.1 gb:NM_006335.1
201822_at	24.1	P	0.023438	gb:NM_006335.1 /DEF=Homo sapiens translocase of inner mitochondrial membrane 17 (yeast) homolog A (TIM17), mRNA. /FEA=mRNA /GEN=TIM17 /PROD=translocase of inner mitochondrial membrane 17(yeast) homolog A /DB_XREF=gi:5454119 /UG=Hs.20716 translocase of inner mitochondrial membrane 17 (yeast) homolog A /FL=gb:BC004439.1 gb:AF106622.1 gb:NM_006335.1
201823_s_at	253.1	P	0.000244	gb:NM_004290.1 /DEF=Homo sapiens ring finger protein 14 (RNF14), mRNA. /FEA=mRNA /GEN=RNF14 /PROD=ring finger protein 14 /DB_XREF=gi:4757761 /UG=Hs.215857 ring finger protein 14 /FL=gb:AF060544.1 gb:NM_004290.1 gb:AB022663.1
201824_at	261.6	P	0.000244	gb:AB022663.1 /DEF=Homo sapiens HFB30 mRNA, complete cds. /FEA=mRNA /GEN=HFB30 /DB_XREF=gi:5019617 /UG=Hs.215857 ring finger protein 14 /FL=gb:AF060544.1 gb:NM_004290.1 gb:AB022663.1
201825_s_at	2228.1	P	0.000244	Consensus includes gb:AL572542 /FEA=EST /DB_XREF=gi:12930912 /DB_XREF=est:AL572542 /CLONE=CS0DI008YC09 (3 prime) /UG=Hs.238126 CGI-49 protein /FL=gb:AF151807.1 gb:NM_016002.1
201826_s_at	571.2	P	0.000244	gb:NM_016002.1 /DEF=Homo sapiens CGI-49 protein (LOC51097), mRNA. /FEA=mRNA /GEN=LOC51097 /PROD=CGI-49 protein /DB_XREF=gi:7705766 /UG=Hs.238126 CGI-49 protein /FL=gb:AF151807.1 gb:NM_016002.1
201827_at	1804.4	P	0.000244	gb:AF113019.1 /DEF=Homo sapiens PRO2451 mRNA, complete cds. /FEA=mRNA /PROD=PRO2451 /DB_XREF=gi:6642761 /UG=Hs.250581 SWISNF related, matrix associated, actin dependent regulator of chromatin, subfamily d, member 2 /FL=gb:U66618.1 gb:NM_003077.1 gb:AF113019.1
201828_x_at	834.9	P	0.000244	gb:NM_003928.1 /DEF=Homo sapiens CAAX box 1 (CXX1), mRNA. /FEA=mRNA /GEN=CXX1 /PROD=CAAX box 1 /DB_XREF=gi:4503180 /UG=Hs.250708 CAAX box 1 /FL=gb:BC002385.1 gb:BC002410.1 gb:AF038168.1 gb:AF052096.1 gb:NM_003928.1
201829_at	1250.4	P	0.000244	Consensus includes gb:AW263232 /FEA=EST /DB_XREF=gi:6640048 /DB_XREF=est:xn79e03.x1 /CLONE=IMAGE:2700700 /UG=Hs.25155 neuroepithelial cell transforming gene 1 /FL=gb:NM_005863.1 gb:U02081.1
201830_s_at	1011.9	P	0.000244	gb:NM_005863.1 /DEF=Homo sapiens neuroepithelial cell transforming gene 1 (NET1), mRNA. /FEA=mRNA /GEN=NET1 /PROD=neuroepithelial cell transforming gene 1 /DB_XREF=gi:5031938 /UG=Hs.25155 neuroepithelial cell transforming gene 1 /FL=gb:NM_005863.1 gb:U02081.1
201831_s_at	217.4	P	0.001221	Consensus includes gb:BE875592 /FEA=EST /DB_XREF=gi:10324368 /DB_XREF=est:601487031F1 /CLONE=IMAGE:3889710 /UG=Hs.325948 vesicle docking protein p115 /FL=gb:D86326.1 gb:NM_003715.1
201832_s_at	689.5	P	0.000244	gb:NM_003715.1 /DEF=Homo sapiens vesicle docking protein p115 (P115), mRNA. /FEA=mRNA /GEN=P115 /PROD=vesicle docking protein p115 /DB_XREF=gi:4505540 /UG=Hs.325948 vesicle docking protein p115 /FL=gb:D86326.1 gb:NM_003715.1
201833_at	1373.9	P	0.000244	gb:NM_001527.1 /DEF=Homo sapiens histone deacetylase 2 (HDAC2), mRNA. /FEA=mRNA /GEN=HDAC2 /PROD=histone deacetylase 2 /DB_XREF=gi:4557640 /UG=Hs.3352 histone deacetylase 2 /FL=gb:U31814.1 gb:NM_001527.1
201834_at	291.5	P	0.001953	gb:BC001007.1 /DEF=Homo sapiens, protein kinase, AMP-activated, beta 1 non-catalytic subunit, clone MGC:8608, mRNA, complete cds. /FEA=mRNA /PROD=protein kinase, AMP-activated, beta 1non-catalytic subunit /DB_XREF=gi:12654368 /UG=Hs.6061 protein kinase, AMP-activated, beta 1 non-catalytic subunit /FL=gb:BC001007.1 gb:BC001056.1 gb:BC001823.1 gb:AF022116.1 gb:U83994.1 gb:NM_006253.1
[truncated: 53,251 more rows]
